# Supplementary material
Source: publisher figshare collection journal article supplement (https://gsapubs.figshare.com/articles/dataset/_/24451885)
Supplement: Supplementary file 1 [file 1]

## Sheet: Dataset S1 - Standards
Session	Date	SampleID	Spot	Pb206Pb204	Pb206Pb204_Int2SE	Pb207Pb204	Pb207Pb204_Int2SE	Pb208Pb204	Pb208Pb204_Int2SE	208Pb/206Pb	2S.E	207Pb/206Pb	2S.E	Pb Conc. (ppm)	2S.E	204Hg/204Total	2S.E
1	2020-06-16	NIST612	1	17.1531	0.0774093	15.5472	0.0541623	37.0777	0.137242	2.16163	0.00616863	0.906398	0.00256836	30.7823	1.08504	0.0727888	0.00163809
1	2020-06-16	NIST612	2	17.0986	0.0453562	15.496	0.0376653	36.9404	0.0892918	2.16046	0.00246264	0.906284	0.00133113	38.4639	2.54493	0.0564856	0.00304621
1	2020-06-16	NIST612	3	17.1023	0.0410749	15.5036	0.0307796	36.9722	0.0788183	2.16185	0.00234599	0.906536	0.00143811	37.4	2.26949	0.0525203	0.00254491
1	2020-06-16	NIST612	4	17.1223	0.0411568	15.5037	0.040886	37.0024	0.0794264	2.16249	0.00298442	0.906056	0.00138852	36.8588	2.30877	0.0545626	0.00229489
1	2020-06-16	NIST612	5	17.0942	0.0456998	15.5017	0.0384928	36.9866	0.0751355	2.16373	0.00280814	0.906849	0.00167545	36.0292	2.11667	0.0541565	0.0027391
1	2020-06-16	NIST612	6	17.0896	0.0605056	15.4988	0.0432797	36.9857	0.122344	2.16425	0.00323761	0.906932	0.00191039	37.8651	1.68892	0.0516006	0.00210391
1	2020-06-16	NIST612	7	17.0653	0.0522555	15.4866	0.0441311	36.9015	0.0994244	2.16346	0.00215082	0.907493	0.00106374	42.0064	2.26218	0.0454126	0.00223812
1	2020-06-16	NIST612	8	17.1541	0.0468922	15.5462	0.0334141	37.0819	0.0865284	2.16172	0.00232325	0.906279	0.0011734	37.5723	2.44053	0.0494429	0.00229003
1	2020-06-16	NIST612	9	17.0584	0.0446529	15.4607	0.0416131	36.9006	0.101463	2.1632	0.00318046	0.906344	0.0018781	42.407	2.27729	0.0445618	0.00210108
1	2020-06-16	NIST612	10	17.0797	0.0445185	15.4957	0.0438546	36.9235	0.0949614	2.16185	0.002753	0.907265	0.00180579	39.4163	2.175	0.0460123	0.00207648
1	2020-06-16	NIST612	11	17.0851	0.0371646	15.502	0.0330732	36.9277	0.070395	2.16142	0.00214103	0.907347	0.0013315	38.7404	2.27205	0.047781	0.00215537
1	2020-06-16	NIST612	12	17.0412	0.0476539	15.4782	0.0385382	36.8829	0.104292	2.16434	0.00380546	0.908287	0.00192981	45.2574	2.27925	0.0412554	0.00196722
1	2020-06-16	NIST612	13	17.0723	0.0759416	15.4492	0.0686629	36.8634	0.16635	2.15927	0.00598541	0.904939	0.00290633	29.5038	0.974107	0.0481829	0.000659118
1	2020-06-16	NIST612	14	17.1154	0.0405593	15.5224	0.0312459	37.0161	0.0755602	2.16276	0.0022823	0.906935	0.00128228	39.4919	2.28867	0.0443822	0.0021635
1	2020-06-16	NIST612	15	17.1266	0.042948	15.5454	0.0418276	37.0547	0.0940505	2.16358	0.00199329	0.907681	0.00171059	42.8168	2.31216	0.0429541	0.00212876
1	2020-06-16	NIST612	16	17.1024	0.0438785	15.5334	0.0345017	36.9998	0.0885104	2.16344	0.00229547	0.908265	0.00117974	38.7857	2.1731	0.0440658	0.00205587
1	2020-06-16	NIST612	17	17.1197	0.0395353	15.5274	0.0290149	37.0326	0.0784679	2.16317	0.00260279	0.906997	0.00113203	41.6763	2.43453	0.0475091	0.00264475
1	2020-06-16	NIST612	18	17.1269	0.0508876	15.5243	0.0409596	37.0213	0.101453	2.1616	0.00249688	0.906437	0.00152187	45.5644	2.5238	0.0401556	0.00189597
1	2020-06-16	NIST612	19	17.1529	0.0389761	15.5509	0.0317054	37.055	0.0931563	2.15832	0.0022255	0.906243	0.000989737	42.2921	2.21458	0.0412782	0.00133863
1	2020-06-16	NIST612	20	17.118	0.0529323	15.529	0.040631	37.0046	0.0948595	2.16176	0.00227318	0.907184	0.00114122	44.4955	2.50136	0.0394778	0.00178561
1	2020-06-16	NIST612	21	17.0852	0.0563499	15.4971	0.046897	36.962	0.102895	2.16342	0.00295132	0.907059	0.00158829	42.3049	1.97695	0.0376642	0.00106293
1	2020-06-16	NIST612	22	17.1116	0.0439813	15.5061	0.0358032	36.9709	0.093469	2.16057	0.0023729	0.906178	0.00143187	45.2594	2.51457	0.0368818	0.0013105
1	2020-06-16	NIST612	23	17.1115	0.0461478	15.5106	0.0432656	36.9864	0.109293	2.1615	0.00259188	0.906449	0.00156239	48.8519	2.49225	0.0346984	0.00182926
1	2020-06-16	NIST612	24	17.1277	0.0522822	15.51	0.0435821	36.9895	0.103102	2.15965	0.00296487	0.90556	0.00160712	48.1679	2.34804	0.0316436	0.00204909
2	2020-06-17	NIST612	1	17.1499	0.0542399	15.5389	0.037675	37.0715	0.118434	2.16164	0.00246869	0.90608	0.00166153	35.3198	2.20058	0.058825	0.00290969
2	2020-06-17	NIST612	2	17.0737	0.048806	15.4829	0.036273	36.917	0.116706	2.16222	0.002727	0.906832	0.00146797	35.6414	2.12347	0.0584139	0.00297985
2	2020-06-17	NIST612	3	17.0405	0.0527085	15.4636	0.0403405	36.8356	0.111239	2.16167	0.00218623	0.907463	0.00116292	35.8955	1.91035	0.0548354	0.00363616
2	2020-06-17	NIST612	4	17.0935	0.0581243	15.499	0.0318553	36.9755	0.117313	2.16317	0.00291106	0.907331	0.00158149	38.6042	2.2326	0.0491324	0.0023372
2	2020-06-17	NIST612	5	17.073	0.0559956	15.4942	0.0416387	36.9208	0.124874	2.16255	0.00265147	0.907543	0.00176858	36.7923	2.03954	0.0461656	0.00245259
2	2020-06-17	NIST612	6	17.1417	0.0523837	15.5418	0.0377327	37.0924	0.110603	2.16274	0.00303402	0.906682	0.0016029	36.9173	2.37372	0.0492427	0.00228358
2	2020-06-17	NIST612	7	17.1192	0.0531246	15.5356	0.0365381	37.0217	0.121427	2.16261	0.00327451	0.907511	0.00179223	35.9748	1.98078	0.0480298	0.00249328
2	2020-06-17	NIST612	8	17.1094	0.0561552	15.5138	0.0419758	36.9794	0.122127	2.16138	0.00299001	0.906756	0.00169247	37.2686	2.14739	0.0475144	0.00181946
2	2020-06-17	NIST612	9	17.069	0.0460294	15.4978	0.037383	36.9243	0.120107	2.16325	0.00309462	0.907956	0.00136491	36.2098	2.28017	0.0467349	0.00195545
2	2020-06-17	NIST612	10	17.0702	0.0526318	15.5102	0.0392669	36.9389	0.117391	2.16397	0.00259429	0.907984	0.00134232	37.8757	2.20025	0.0445298	0.0021725
3	2020-07-30	NIST612	1	17.1135	0.0977788	15.4904	0.0977788	37.0264	0.134209	2.16364	0.00698614	0.905161	0.00607361	33.0998	0.653608	0.0449098	0.00177169
3	2020-07-30	NIST612	2	17.1001	0.0571388	15.5167	0.0571388	37.0403	0.105908	2.16614	0.00455255	0.908262	0.0021429	35.5483	1.91153	0.0392627	0.00291689
3	2020-07-30	NIST612	3	17.0964	0.0604849	15.5238	0.0604849	36.9622	0.107368	2.16204	0.00390793	0.908033	0.00192636	38.2453	2.29116	0.0361203	0.00330702
3	2020-07-30	NIST612	4	17.1218	0.0481641	15.5063	0.0481641	36.9574	0.0917919	2.15854	0.00439231	0.905658	0.00273604	35.7822	1.82608	0.035238	0.00371332
3	2020-07-30	NIST612	5	17.1367	0.0807468	15.5216	0.0807468	37.0312	0.157173	2.16096	0.0041793	0.905759	0.00225888	40.5969	2.35712	0.034283	0.00257229
3	2020-07-30	NIST612	6	17.1196	0.0525803	15.5246	0.0525803	36.9923	0.104096	2.16084	0.00458756	0.90685	0.00291158	35.983	1.9611	0.0353526	0.00327341
3	2020-07-30	NIST612	7	17.1079	0.0569184	15.5261	0.0569184	37.0192	0.126892	2.16388	0.00371682	0.907547	0.00210502	37.59	1.96595	0.0374599	0.00363525
3	2020-07-30	NIST612	8	17.0494	0.0640671	15.4891	0.0640671	36.9384	0.132751	2.16659	0.00417626	0.908504	0.00275606	35.9163	1.63605	0.0414351	0.0034475
3	2020-07-30	NIST612	9	17.1248	0.0592778	15.5359	0.0592778	37.0036	0.101985	2.16087	0.00510511	0.907227	0.00208308	36.4632	2.2283	0.0360415	0.00259331
3	2020-07-30	NIST612	10	17.0733	0.0556772	15.4708	0.0556772	36.9588	0.097622	2.16476	0.00318384	0.906161	0.00227117	40.2737	2.2886	0.0403399	0.00264368
4	2020-07-31	NIST612	1	17.0902	0.0668355	15.506	0.0652994	36.9702	0.143095	2.16325	0.00206513	0.907302	0.00131671	33.4344	1.61781	0.0259861	0.0015008
4	2020-07-31	NIST612	2	17.0889	0.0313591	15.4933	0.0339493	36.9798	0.070797	2.16397	0.00220896	0.906629	0.00147414	35.3118	1.8153	0.0244022	0.00131071
4	2020-07-31	NIST612	3	17.0923	0.0494013	15.5021	0.0399358	36.9723	0.0858469	2.16312	0.00254083	0.906968	0.000945013	35.8396	1.80352	0.025391	0.00105833
4	2020-07-31	NIST612	4	17.0922	0.042747	15.4935	0.0392005	36.9546	0.0946079	2.16208	0.00210157	0.906473	0.00118586	37.5231	1.88391	0.026544	0.0012803
4	2020-07-31	NIST612	5	17.0906	0.0521986	15.5102	0.0416204	36.9886	0.106686	2.16428	0.00191831	0.907538	0.000913894	37.9564	1.8185	0.0266497	0.0014133
4	2020-07-31	NIST612	6	17.0988	0.0489376	15.5233	0.0387324	36.9986	0.110451	2.16381	0.0015413	0.907866	0.00116298	41.9062	1.78762	0.0245336	0.00171885
4	2020-07-31	NIST612	7	17.1138	0.0477741	15.5138	0.0441963	37.0016	0.110611	2.16151	0.00145431	0.906515	0.00096257	37.984	1.81446	0.0271227	0.00141107
4	2020-07-31	NIST612	8	17.0998	0.045518	15.5014	0.046396	36.966	0.106099	2.16177	0.0014002	0.906525	0.000870262	38.922	1.82187	0.0265831	0.00149548
4	2020-07-31	NIST612	9	17.1104	0.0494107	15.5065	0.0454459	36.9812	0.0990105	2.16134	0.00248587	0.906267	0.00166828	35.6168	1.34056	0.0260203	0.000789691
4	2020-07-31	NIST612	10	17.1352	0.0515868	15.5355	0.0450243	37.0455	0.110418	2.16195	0.00157274	0.906646	0.00112361	36.3965	1.52443	0.024127	0.00116423
5	2020-08-03	NIST612	1	17.0696	0.0616112	15.4788	0.061343	36.8894	0.140741	2.16112	0.00178837	0.906803	0.00123884	40.6363	1.85139	0.0269911	0.00194617
5	2020-08-03	NIST612	2	17.1567	0.0930086	15.5746	0.0736985	37.1602	0.192366	2.16595	0.0024523	0.907792	0.0017577	39.4632	1.76411	0.0223148	0.0016211
5	2020-08-03	NIST612	3	17.1227	0.0599262	15.5474	0.0597545	37.1243	0.136903	2.16814	0.00208717	0.907998	0.00113337	37.4229	1.66135	0.0252635	0.00155547
5	2020-08-03	NIST612	4	17.0445	0.0697444	15.4886	0.0584046	36.9381	0.172373	2.16716	0.00203243	0.908722	0.00117136	36.0034	1.79903	0.0228619	0.00160286
5	2020-08-03	NIST612	5	17.0982	0.0595873	15.5096	0.0513741	37.0033	0.14428	2.16417	0.00258909	0.907091	0.00139696	37.817	1.68473	0.0209757	0.00161351
6	2020-08-04	NIST612	1	17.1005	0.0597122	15.5048	0.0525947	36.9856	0.129944	2.16284	0.00186661	0.906691	0.00115511	37.1352	1.82586	0.0440255	0.00207823
6	2020-08-04	NIST612	2	17.1405	0.0460812	15.5709	0.0368651	37.142	0.0949768	2.16693	0.00188859	0.908434	0.00098018	34.0321	1.22964	0.0395821	0.00126712
6	2020-08-04	NIST612	3	17.1517	0.0640028	15.5496	0.0629953	37.0615	0.139913	2.1608	0.00156607	0.90659	0.000868138	39.222	1.75631	0.0320812	0.00220136
6	2020-08-04	NIST612	4	17.0362	0.0800342	15.4749	0.110568	36.8791	0.229698	2.16473	0.00472289	0.908345	0.00311085	43.3152	1.3012	0.0253566	0.00153055
6	2020-08-04	NIST612	5	17.0568	0.0720951	15.4732	0.0748593	36.9491	0.167994	2.16624	0.00538985	0.907155	0.00234956	41.8436	1.84241	0.0268577	0.00187138
6	2020-08-04	NIST612	6	17.1501	0.0553306	15.5512	0.0456688	37.0831	0.104884	2.16229	0.00219014	0.906781	0.00135822	35.7819	1.71609	0.0317605	0.00182575
6	2020-08-04	NIST612	7	17.1229	0.0489095	15.544	0.0371073	37.0227	0.0944674	2.16219	0.0023289	0.907799	0.00126739	35.5854	1.8797	0.0315855	0.00182536
6	2020-08-04	NIST612	8	17.1071	0.0515782	15.5104	0.0428823	36.9746	0.0958366	2.16138	0.00217815	0.906673	0.000806795	34.5463	1.60302	0.0314984	0.00163663
6	2020-08-04	NIST612	9	17.1086	0.0671085	15.5134	0.0663473	37.0064	0.141983	2.16304	0.00205479	0.906762	0.00159504	37.1702	1.57393	0.0292454	0.00189735
6	2020-08-04	NIST612	10	17.0982	0.0475238	15.4937	0.0446399	36.9302	0.109005	2.15989	0.00152246	0.906163	0.000862121	34.8338	1.64355	0.0304021	0.00160391
6	2020-08-04	NIST612	11	17.0861	0.0633414	15.4991	0.0424979	36.9518	0.11756	2.1627	0.00314369	0.907133	0.00182534	35.7645	1.34465	0.0289213	0.00128022
6	2020-08-04	NIST612	12	17.103	0.0470205	15.5117	0.036447	36.9939	0.0989478	2.16301	0.00291465	0.906962	0.00141325	38.8894	2.05175	0.0255284	0.00183281
6	2020-08-04	NIST612	13	17.056	0.0702034	15.4867	0.0604931	36.9995	0.156781	2.1693	0.00144008	0.907995	0.00148465	41.7443	1.78006	0.0225187	0.00162691
6	2020-08-04	NIST612	14	17.094	0.0630042	15.516	0.0634914	37.0215	0.151	2.16576	0.00283089	0.907691	0.00172583	40.3805	1.97265	0.0224966	0.00172065
6	2020-08-04	NIST612	15	17.0926	0.05363	15.5064	0.0510674	36.9828	0.111343	2.16368	0.00250046	0.907202	0.00145519	33.3572	1.43877	0.0263891	0.00112057
6	2020-08-04	NIST612	16	17.0404	0.0503535	15.4671	0.0479826	36.8977	0.116901	2.16531	0.00178608	0.907675	0.00118198	34.7716	1.63596	0.0261841	0.00142906
6	2020-08-04	NIST612	17	17.079	0.0215248	15.5072	0.0308477	36.9392	0.0612925	2.16284	0.00154811	0.90797	0.00116766	41.3769	1.52067	0.0205587	0.001668
6	2020-08-04	NIST612	18	17.0745	0.0794754	15.4889	0.0471861	36.9508	0.128	2.16414	0.00335958	0.907161	0.00210455	37.4308	1.77993	0.0232656	0.00118151
6	2020-08-04	NIST612	19	17.0358	0.0660966	15.464	0.0595584	36.8934	0.150557	2.16565	0.00230006	0.907739	0.00122891	38.3906	1.6861	0.0216992	0.0012549
6	2020-08-04	NIST612	20	17.1154	0.0754548	15.5207	0.0706983	36.9794	0.164677	2.16059	0.00355078	0.906831	0.00224566	39.3951	1.474	0.0199324	0.00102311
6	2020-08-04	NIST612	21	17.1228	0.0691764	15.5302	0.0574858	37.0235	0.133009	2.16225	0.00223771	0.906997	0.00140855	38.3994	1.72791	0.0222601	0.00138055
7	2020-08-05	NIST612	1	17.0986	0.0597384	15.5042	0.0593772	36.9491	0.135933	2.16094	0.00251549	0.906748	0.00112896	36.815	1.67812	0.0525121	0.00207707
7	2020-08-05	NIST612	2	17.0977	0.0790947	15.5066	0.0615307	36.9903	0.146653	2.16349	0.00287628	0.906949	0.00105501	41.1326	1.77173	0.0403829	0.00260264
7	2020-08-05	NIST612	3	17.0712	0.0711724	15.4681	0.0691827	36.8714	0.142415	2.15988	0.00274379	0.906096	0.00179303	33.3534	1.181	0.0497264	0.00158474
7	2020-08-05	NIST612	4	17.1306	0.045495	15.5192	0.0420066	37.012	0.0944579	2.16058	0.00242182	0.905933	0.00101722	38.481	1.84375	0.0413698	0.00198139
7	2020-08-05	NIST612	5	17.1108	0.0425924	15.5017	0.0432426	36.963	0.0893546	2.16022	0.00271871	0.905965	0.00168319	35.7704	1.61838	0.0443299	0.0021415
7	2020-08-05	NIST612	6	17.0798	0.0553988	15.4849	0.045662	36.9049	0.102337	2.16077	0.00310792	0.906633	0.00115154	35.6547	1.71372	0.0425439	0.00196408
7	2020-08-05	NIST612	7	17.0726	0.0589764	15.4785	0.0490039	36.9241	0.118439	2.16278	0.00304201	0.906633	0.00147203	32.6157	0.906045	0.0458306	0.00109369
7	2020-08-05	NIST612	8	17.0763	0.0523612	15.5103	0.0429863	36.9139	0.104383	2.16172	0.0024911	0.908311	0.00160078	35.8059	1.7989	0.0418831	0.00208292
7	2020-08-05	NIST612	9	17.0874	0.0415929	15.4784	0.040445	36.8935	0.0907024	2.15912	0.00211394	0.905844	0.00139638	34.4664	1.51472	0.0418963	0.00221504
7	2020-08-05	NIST612	10	17.0863	0.0519586	15.4975	0.05172	36.9633	0.111665	2.16334	0.00253013	0.907016	0.00136561	35.8686	1.7037	0.0389582	0.002012
7	2020-08-05	NIST612	11	17.1118	0.0419063	15.5286	0.0428467	37.0177	0.0826833	2.1633	0.00371221	0.907483	0.00178651	38.8225	1.69963	0.0366582	0.00184437
7	2020-08-05	NIST612	12	17.0793	0.0923997	15.4793	0.0920524	36.9146	0.195176	2.16138	0.0025447	0.906318	0.00191685	33.262	0.963732	0.0428119	0.00111725
7	2020-08-05	NIST612	13	17.0741	0.0772324	15.5219	0.0516742	36.9572	0.128685	2.16457	0.00458277	0.909118	0.00250198	32.6536	0.86729	0.0436436	0.00133662
7	2020-08-05	NIST612	14	17.0848	0.0511156	15.4908	0.0453395	36.9414	0.0987647	2.16226	0.00261949	0.906711	0.00121951	36.8212	1.73306	0.0381604	0.0019783
7	2020-08-05	NIST612	15	17.0822	0.0544169	15.4781	0.0513244	36.9192	0.106923	2.16129	0.00261828	0.906099	0.00137105	36.5916	1.74979	0.0348687	0.00163225
7	2020-08-05	NIST612	16	17.0959	0.0583863	15.488	0.0583048	36.9408	0.116191	2.16082	0.0031747	0.90595	0.00154433	34.7817	1.05678	0.0387506	0.00126969
7	2020-08-05	NIST612	17	17.08	0.044693	15.5126	0.037012	36.948	0.0889137	2.16324	0.00183503	0.908238	0.00111734	36.8791	1.82138	0.034933	0.00168372
7	2020-08-05	NIST612	18	17.0947	0.0509888	15.5006	0.0321905	36.9421	0.0829589	2.16105	0.00281504	0.906763	0.00134836	34.3619	1.11738	0.0369166	0.000901048
7	2020-08-05	NIST612	19	17.0781	0.0304685	15.4854	0.0300574	36.9181	0.0571147	2.16173	0.00228813	0.906746	0.00130377	36.4142	1.79377	0.0339277	0.00158502
8	2020-09-08	NIST612	1	17.1895	0.0707875	15.5965	0.062995	37.1173	0.11348	2.16114	0.00629246	0.908085	0.00278229	39.634	1.64461	0.0182755	0.000760412
8	2020-09-08	NIST612	2	17.1321	0.0582058	15.5646	0.0529995	37.069	0.100307	2.16384	0.00439873	0.908555	0.00263446	39.9166	1.58801	0.0179751	0.000733991
8	2020-09-08	NIST612	3	17.1652	0.0558947	15.5275	0.0486105	37.0644	0.105113	2.15938	0.00509237	0.904633	0.00219933	39.6499	1.50038	0.0177284	0.000639488
8	2020-09-08	NIST612	4	17.1606	0.0651526	15.5507	0.0651284	37.0767	0.125579	2.16206	0.00514946	0.906232	0.00310707	37.6815	1.474	0.0175412	0.000756753
8	2020-09-08	NIST612	5	17.1344	0.0737803	15.5325	0.0632854	37.0129	0.122312	2.16033	0.00620177	0.906567	0.00290125	40.6472	1.46197	0.0160836	0.000677883
8	2020-09-08	NIST612	6	17.114	0.0845615	15.5346	0.0764655	37.0201	0.160417	2.16328	0.00731285	0.907766	0.00379084	39.7738	1.28944	0.0158901	0.000866027
8	2020-09-08	NIST612	7	17.0843	0.0634486	15.4939	0.0778486	36.9683	0.147639	2.16395	0.00725267	0.906934	0.00404264	42.0321	1.4117	0.0148702	0.000685626
8	2020-09-08	NIST612	8	17.1098	0.0785007	15.5323	0.0755412	36.9712	0.134948	2.16098	0.00667697	0.907849	0.00350911	39.5261	1.42791	0.0156367	0.000745593
8	2020-09-08	NIST612	9	17.0841	0.0569957	15.4776	0.0655056	36.9632	0.114212	2.16369	0.00637961	0.905984	0.00309488	40.869	1.28977	0.0150757	0.000814228
8	2020-09-08	NIST612	10	17.1053	0.0716247	15.5089	0.058804	36.9209	0.145458	2.15884	0.00555543	0.907012	0.00321717	37.8018	1.48771	0.0156265	0.000603323
8	2020-09-08	NIST612	11	17.1207	0.074934	15.5178	0.0925104	37.01	0.147195	2.16183	0.00767093	0.906411	0.0046985	41.3411	1.37985	0.0141789	0.000653854
8	2020-09-08	NIST612	12	17.0273	0.0788129	15.4784	0.0858417	36.8975	0.153325	2.16704	0.00624863	0.90905	0.00354006	42.6374	1.31536	0.0139504	0.000754883
8	2020-09-08	NIST612	13	17.0331	0.0758004	15.4156	0.0837117	36.7859	0.138101	2.15975	0.00750569	0.905045	0.00362242	42.9177	0.99988	0.0134629	0.000753686
8	2020-09-08	NIST612	14	17.1274	0.067978	15.4798	0.0839581	37.0002	0.125194	2.16037	0.00758638	0.903825	0.00449372	44.5201	1.16142	0.0136015	0.000786344
8	2020-09-08	NIST612	15	17.08	0.0972842	15.501	0.0739892	36.9135	0.162582	2.16138	0.00669627	0.907639	0.0036789	36.9169	1.05339	0.0154812	0.000610766
8	2020-09-08	NIST612	16	17.126	0.0801107	15.5378	0.070315	37.094	0.137705	2.16608	0.00633484	0.907339	0.00413128	39.9566	1.34848	0.0145264	0.000639512
8	2020-09-08	NIST612	17	17.1117	0.0686125	15.4944	0.0712811	36.9431	0.123844	2.15903	0.00506329	0.905509	0.00298085	41.3409	1.45501	0.0134485	0.000551495
8	2020-09-08	NIST612	18	17.1242	0.0804387	15.5537	0.0898801	37.0495	0.192324	2.16363	0.00875369	0.908315	0.00442435	44.1261	1.1627	0.0130318	0.000631853
8	2020-09-08	NIST612	19	17.141	0.0635105	15.5125	0.0532646	36.9689	0.121024	2.15688	0.00695227	0.905048	0.00320541	37.8973	1.15115	0.0149834	0.000559429
8	2020-09-08	NIST612	20	17.1212	0.0844917	15.5582	0.0727308	36.9921	0.122217	2.16069	0.00664172	0.908747	0.00403639	46.9963	1.03909	0.0121014	0.000807571
8	2020-09-08	NIST612	21	17.0688	0.0738377	15.4848	0.0634381	36.9446	0.126692	2.1646	0.00561768	0.907258	0.00297786	40.6421	1.49694	0.0141117	0.000716583
8	2020-09-08	NIST612	22	17.0711	0.0813963	15.4566	0.0696806	36.8552	0.138731	2.1569	0.00490107	0.905476	0.00384696	44.3725	1.27349	0.0126885	0.000420429
8	2020-09-08	NIST612	23	17.0429	0.103328	15.4451	0.0686226	36.8562	0.16918	2.16275	0.00845193	0.906333	0.00357058	43.8625	1.26694	0.0128342	0.000752603
9	2020-09-09	NIST612	1	17.0691	0.0657212	15.545	0.148816	37.0748	0.193779	2.17206	0.00973441	0.910697	0.00737278	53.9194	0.93998	0.0521597	0.00162902
9	2020-09-09	NIST612	2	17.1637	0.0692119	15.4906	0.0966024	36.9927	0.17821	2.15534	0.00828393	0.902562	0.00543699	44.2397	1.55665	0.0396537	0.00174429
9	2020-09-09	NIST612	3	16.9995	0.0962392	15.4749	0.0801099	36.9275	0.141369	2.17252	0.0085593	0.910416	0.00475479	42.1868	1.41376	0.0399355	0.00164097
9	2020-09-09	NIST612	4	17.1003	0.0909649	15.5016	0.0804626	36.9798	0.170264	2.16268	0.0070375	0.907741	0.00338918	42.4067	1.63772	0.0422788	0.00166758
9	2020-09-09	NIST612	5	17.1262	0.151475	15.5147	0.116284	36.8942	0.221896	2.15468	0.0131161	0.90604	0.00557098	38.4138	1.05759	0.0400863	0.00116931
9	2020-09-09	NIST612	6	17.1147	0.105891	15.5474	0.0806682	37.0154	0.157102	2.16302	0.0086454	0.908518	0.00439444	41.5699	1.34296	0.0375437	0.0018029
9	2020-09-09	NIST612	7	17.1066	0.0935265	15.527	0.0972356	36.9984	0.147981	2.163	0.0102806	0.907693	0.00453767	45.8309	1.34975	0.0366526	0.00122298
9	2020-09-09	NIST612	8	17.0484	0.173264	15.4453	0.136896	36.8522	0.267673	2.1619	0.0143471	0.906025	0.00445103	44.4272	1.32001	0.0223464	0.0013638
9	2020-09-09	NIST612	9	17.0793	0.118857	15.5078	0.0896514	36.8954	0.24445	2.16042	0.0128218	0.908083	0.00527339	37.7843	0.893577	0.0398919	0.000889014
9	2020-09-09	NIST612	10	17.0934	0.0952536	15.4597	0.0816994	37.0138	0.168746	2.16565	0.00874125	0.904551	0.00472489	39.5937	1.45017	0.0373076	0.00154396
9	2020-09-09	NIST612	11	17.0935	0.118247	15.5411	0.13312	36.987	0.167807	2.16405	0.00995726	0.909273	0.00757295	36.2115	0.816351	0.0444066	0.00143177
9	2020-09-09	NIST612	12	17.1239	0.0870912	15.5407	0.0633803	37.0029	0.144625	2.16103	0.00755915	0.907638	0.00482126	42.5137	1.1764	0.0328807	0.00176678
9	2020-09-09	NIST612	13	17.1746	0.0728203	15.5475	0.109719	37.0877	0.164927	2.15954	0.00814001	0.905289	0.00578341	43.5573	1.30472	0.033954	0.00176865
9	2020-09-09	NIST612	14	17.0887	0.0890609	15.4736	0.0824471	36.9742	0.151207	2.16552	0.00631134	0.905582	0.00382401	38.825	1.49645	0.0368237	0.000928827
9	2020-09-09	NIST612	15	17.1127	0.0777368	15.5123	0.0778405	36.9792	0.129569	2.16117	0.00678392	0.905655	0.00371809	38.6231	1.55245	0.0331208	0.00134277
9	2020-09-09	NIST612	16	17.1426	0.0941658	15.5855	0.0923711	36.9953	0.155717	2.15819	0.00853599	0.909191	0.00424669	45.001	1.13845	0.0207099	0.000893507
9	2020-09-09	NIST612	17	17.0789	0.0763839	15.4647	0.0647469	36.8976	0.140913	2.16061	0.00629365	0.905578	0.00337001	37.8107	1.60056	0.0317322	0.000872973
9	2020-09-09	NIST612	18	17.1524	0.0957472	15.4828	0.0964249	36.8885	0.166621	2.15079	0.00929093	0.902768	0.0066256	36.2426	0.844847	0.0393451	0.00130856
9	2020-09-09	NIST612	19	17.1	0.0767573	15.5039	0.0617833	36.965	0.128267	2.16016	0.00772286	0.905813	0.00408569	38.275	1.36282	0.0360116	0.00159575
9	2020-09-09	NIST612	20	17.1501	0.0827257	15.5499	0.0592456	36.9639	0.113281	2.15725	0.00653215	0.906888	0.00447154	38.9888	1.49856	0.0299116	0.000887169
9	2020-09-09	NIST612	21	17.1655	0.0708162	15.5592	0.0682606	37.0527	0.117261	2.15877	0.0063123	0.906494	0.00345522	38.0681	1.40171	0.0326581	0.00146375
10	2020-09-10	NIST612	1	17.1232	0.10951	15.5226	0.098319	37.0676	0.170551	2.16539	0.0107779	0.906788	0.00602742	36.5475	1.63726	0.0595404	0.00167902
10	2020-09-10	NIST612	2	17.0763	0.081211	15.471	0.0901739	36.9302	0.147056	2.1638	0.00918975	0.907386	0.00572707	37.496	1.52506	0.0573049	0.00245046
10	2020-09-10	NIST612	3	17.1316	0.105189	15.5143	0.0706843	37.0057	0.151892	2.16078	0.0114705	0.905896	0.00523072	37.6541	1.54587	0.0655122	0.00233769
10	2020-09-10	NIST612	4	17.0984	0.0865362	15.5118	0.0773609	36.931	0.139942	2.15805	0.00874136	0.906249	0.00448571	38.6976	1.57349	0.0602339	0.00221036
10	2020-09-10	NIST612	5	17.1331	0.109669	15.5649	0.0889369	37.0434	0.157495	2.16281	0.0116907	0.907427	0.00591195	38.846	1.67924	0.0565415	0.00202732
10	2020-09-10	NIST612	6	17.1782	0.124577	15.5663	0.146066	37.0921	0.241148	2.15942	0.0128349	0.906276	0.00934014	38.4711	0.977734	0.0542975	0.00171595
10	2020-09-10	NIST612	7	17.0718	0.101123	15.4796	0.115053	36.9419	0.189509	2.16416	0.0117096	0.906843	0.00706604	39.1951	1.20356	0.0528304	0.0015651
10	2020-09-10	NIST612	8	17.0733	0.112075	15.5552	0.113229	37.0777	0.279819	2.17175	0.014097	0.911137	0.00704044	50.2562	0.899004	0.0467109	0.00147166
10	2020-09-10	NIST612	9	17.1496	0.141695	15.5695	0.101693	37.0339	0.20043	2.16004	0.0152297	0.908145	0.00792648	34.2825	0.904695	0.0595863	0.00140715
10	2020-09-10	NIST612	10	17.1748	0.116973	15.5745	0.117715	37.1207	0.269484	2.16148	0.0125475	0.906921	0.00696006	40.5068	0.946772	0.0513744	0.00190868
10	2020-09-10	NIST612	11	17.1226	0.116231	15.56	0.135586	37.0772	0.256211	2.16554	0.0112807	0.908832	0.00756719	42.1487	1.16567	0.0512629	0.00254955
10	2020-09-10	NIST612	12	17.1177	0.0895898	15.5132	0.0992526	36.9442	0.138112	2.15856	0.0110596	0.906406	0.00681287	46.3949	1.4054	0.0450756	0.00219289
10	2020-09-10	NIST612	13	17.0706	0.10992	15.4782	0.129357	37.1553	0.16322	2.18061	0.0129615	0.906883	0.00814776	35.8158	1.01361	0.0499173	0.00150176
11	2020-09-14	NIST612	1	17.1494	0.0924065	15.5455	0.0796305	37.0697	0.134871	2.16198	0.00860181	0.906638	0.00472657	44.0802	1.91817	0.055978	0.00260196
11	2020-09-14	NIST612	2	17.1059	0.0806785	15.5083	0.0648059	36.9846	0.131003	2.16239	0.00729184	0.907645	0.00366292	42.822	1.95132	0.0603621	0.00208426
11	2020-09-14	NIST612	3	17.1128	0.106042	15.4978	0.0941841	36.9905	0.175143	2.16181	0.00692653	0.905705	0.00392873	46.9688	1.70606	0.0527794	0.00247123
11	2020-09-14	NIST612	4	17.0954	0.0741414	15.4871	0.0670506	36.94	0.138582	2.16106	0.00771554	0.906028	0.00383379	43.0784	1.96271	0.058562	0.00220476
11	2020-09-14	NIST612	5	17.064	0.069123	15.4685	0.0710306	36.9403	0.131434	2.16501	0.00711436	0.907556	0.00359787	42.7943	1.86304	0.0561007	0.00193494
11	2020-09-14	NIST612	6	17.0121	0.0723855	15.4822	0.0733819	36.9647	0.152104	2.173	0.00654514	0.910133	0.00350117	42.487	1.78573	0.0568628	0.00230714
11	2020-09-14	NIST612	7	17.1163	0.0761842	15.4988	0.0647301	37.0092	0.125912	2.1625	0.00750199	0.905634	0.00411378	42.2364	1.82312	0.0552104	0.00187624
11	2020-09-14	NIST612	8	17.1321	0.080266	15.5426	0.077477	36.9721	0.133206	2.15839	0.00745457	0.907336	0.00402104	41.0853	1.83896	0.0546571	0.00196425
11	2020-09-14	NIST612	9	17.0899	0.0622768	15.4899	0.0524042	37.0213	0.107455	2.16649	0.00728976	0.906483	0.00364542	42.235	1.83509	0.0522701	0.00192877
11	2020-09-14	NIST612	10	17.0882	0.0724217	15.502	0.0740228	36.9381	0.119733	2.15958	0.00789058	0.906316	0.0044798	41.3436	1.6329	0.049203	0.00202116
11	2020-09-14	NIST612	11	17.1726	0.114126	15.5214	0.0915551	37.0209	0.214122	2.1559	0.00746295	0.903893	0.00387361	50.5286	1.28303	0.0467603	0.00151503
11	2020-09-14	NIST612	12	17.1355	0.0622677	15.5506	0.0634183	37.1135	0.128694	2.16545	0.00669371	0.906506	0.00358466	43.0552	1.78536	0.0541096	0.00193613
11	2020-09-14	NIST612	13	17.0947	0.0654449	15.518	0.0837692	37.0106	0.130069	2.16513	0.00981827	0.907825	0.0061263	50.5355	1.32549	0.0457212	0.00111996
12	2020-11-02	NIST612	1	17.0629	0.0859682	15.4809	0.0903863	36.9676	0.143419	2.16669	0.008087	0.905148	0.00442164	46.2482	1.42483	0.039007	0.0010697
12	2020-11-02	NIST612	2	17.0716	0.111231	15.4845	0.11102	36.9002	0.17935	2.16166	0.0121169	0.907066	0.00532843	44.1127	0.873827	0.0377784	0.00145956
12	2020-11-02	NIST612	3	17.0617	0.106581	15.4894	0.124563	37.0124	0.223953	2.1694	0.00716052	0.907884	0.0059675	34.1597	0.612201	0.0449269	0.00147386
12	2020-11-02	NIST612	4	17.0837	0.11176	15.5653	0.093166	37.0322	0.186565	2.16792	0.0097797	0.91119	0.00420461	34.0696	0.666421	0.0452608	0.00167968
12	2020-11-02	NIST612	5	17.1197	0.0651503	15.5046	0.0613523	36.9929	0.117279	2.16095	0.00479579	0.906641	0.00284034	40.9661	1.53629	0.0396019	0.00171299
12	2020-11-02	NIST612	6	17.0941	0.0619358	15.5207	0.0597072	36.9596	0.118726	2.16225	0.00535587	0.90885	0.0032899	40.4317	1.57935	0.0399071	0.00138791
12	2020-11-02	NIST612	7	17.1131	0.117134	15.532	0.102701	37.0029	0.192124	2.16262	0.0108794	0.907747	0.00560825	36.1992	1.05921	0.0441697	0.000906391
12	2020-11-02	NIST612	8	17.0907	0.0571385	15.4987	0.0642688	36.9357	0.130972	2.16124	0.00582875	0.906879	0.00295039	40.1328	1.52304	0.0402011	0.00148739
12	2020-11-02	NIST612	9	17.1527	0.0764717	15.5842	0.0699397	37.0957	0.143313	2.16281	0.00759971	0.908617	0.00390481	38.7307	1.15715	0.0420022	0.0011606
12	2020-11-02	NIST612	10	17.1361	0.0761568	15.5306	0.0675818	37.0539	0.148806	2.16247	0.00550813	0.906379	0.00314316	40.0931	1.53916	0.0419568	0.00139206
12	2020-11-02	NIST612	11	17.1126	0.0739545	15.5142	0.0544936	36.9047	0.102897	2.15823	0.00575057	0.906683	0.00274035	39.0343	1.5073	0.0379113	0.00115747
12	2020-11-02	NIST612	12	17.1139	0.0775912	15.486	0.0894626	37.0178	0.13516	2.16321	0.00741537	0.904907	0.00403621	34.4368	0.932227	0.0456735	0.00153592
12	2020-11-02	NIST612	13	17.1088	0.08673	15.5165	0.084736	36.9629	0.14777	2.16066	0.00807662	0.905804	0.00335586	34.4179	0.818401	0.0457491	0.00107315
12	2020-11-02	NIST612	14	17.0933	0.0604459	15.4791	0.0609565	36.9234	0.0976313	2.15978	0.00597216	0.904727	0.003687	39.0278	1.45824	0.0372404	0.00120554
12	2020-11-02	NIST612	15	17.0974	0.0628876	15.5011	0.0551813	36.9872	0.121975	2.16349	0.0068978	0.90672	0.00347525	39.2437	1.48039	0.0386461	0.00104243
12	2020-11-02	NIST612	16	17.1005	0.0699648	15.4841	0.072379	36.9184	0.141462	2.16054	0.00468515	0.90669	0.00308277	39.0791	1.45218	0.0403054	0.00137938
12	2020-11-02	NIST612	17	17.0623	0.0695332	15.4652	0.0609093	36.9278	0.120425	2.16447	0.00566058	0.906451	0.00265595	36.5758	1.31383	0.0419258	0.00136106
12	2020-11-02	NIST612	18	17.0786	0.0888009	15.5059	0.0827644	37.0186	0.144222	2.16777	0.00765296	0.907982	0.00389409	34.994	0.949091	0.0444333	0.00120724
12	2020-11-02	NIST612	19	17.1757	0.103647	15.538	0.12335	37.0865	0.217814	2.15933	0.00811616	0.904693	0.0060967	31.8912	0.678589	0.04945	0.00143592
13	2020-11-16	NIST612	1	17.1122	0.071845	15.5507	0.0663558	37.0426	0.146554	2.16473	0.00599408	0.908766	0.00279897	34.091	0.508132	0.050776	0.00110531
13	2020-11-16	NIST612	2	17.0899	0.0740314	15.5407	0.0835197	36.9954	0.164491	2.1648	0.00805722	0.909364	0.00370945	34.8034	0.663778	0.050434	0.00129062
13	2020-11-16	NIST612	3	17.0707	0.0716309	15.4913	0.0517247	36.9113	0.141465	2.16229	0.00500377	0.907507	0.00298434	35.134	0.589892	0.0511634	0.00106009
13	2020-11-16	NIST612	4	17.1115	0.0447703	15.5258	0.0530181	37.0295	0.0903516	2.16403	0.00428733	0.907332	0.00214606	42.4774	0.751645	0.0462222	0.000938008
13	2020-11-16	NIST612	5	17.0729	0.0480772	15.5052	0.0443016	37.0093	0.100555	2.16774	0.00273965	0.908187	0.00126596	42.2783	1.19688	0.0474936	0.00133026
13	2020-11-16	NIST612	6	17.0763	0.0707979	15.4917	0.06653	36.9833	0.118931	2.16579	0.00426281	0.907207	0.00227157	50.2212	1.02231	0.0386235	0.00121954
13	2020-11-16	NIST612	7	17.0822	0.0630782	15.5096	0.0495831	37.035	0.118573	2.16809	0.00452399	0.90796	0.00206955	47.4137	1.25163	0.0400159	0.0012968
13	2020-11-16	NIST612	8	17.1325	0.0389917	15.5478	0.0364365	37.0879	0.071155	2.16483	0.00271026	0.907523	0.00156144	39.7858	1.56238	0.0461638	0.00133313
13	2020-11-16	NIST612	9	17.1012	0.0401768	15.5182	0.0365654	37.0085	0.0842921	2.16411	0.00220689	0.907444	0.00124418	40.3475	1.57883	0.0460703	0.00159006
13	2020-11-16	NIST612	10	17.0431	0.0404207	15.4618	0.039877	36.8798	0.0837926	2.16395	0.0030085	0.907229	0.00155176	39.4849	1.51815	0.0459206	0.00126171
13	2020-11-16	NIST612	11	17.0531	0.0405518	15.4562	0.0399329	36.8842	0.0867396	2.16292	0.00228282	0.906369	0.00137188	40.0482	1.54498	0.0447932	0.00139331
13	2020-11-16	NIST612	12	17.0832	0.0413164	15.4982	0.040136	36.9814	0.0834088	2.16481	0.00251492	0.907226	0.00120384	39.9739	1.55637	0.0464341	0.00164893
13	2020-11-16	NIST612	13	17.0854	0.0650258	15.5316	0.0437166	37.0905	0.10056	2.17094	0.00398143	0.90908	0.00160138	45.7488	1.30899	0.0406088	0.00164852
13	2020-11-16	NIST612	14	17.0386	0.0498802	15.4619	0.0504065	36.9645	0.111996	2.16946	0.00250297	0.907466	0.00143348	47.0346	1.19371	0.0397847	0.00123431
13	2020-11-16	NIST612	15	17.0937	0.0480047	15.5279	0.0448482	37.0131	0.0874398	2.16534	0.00421282	0.908413	0.00207325	45.8893	1.28161	0.041653	0.00124316
13	2020-11-16	NIST612	16	17.1203	0.0389073	15.5267	0.0322209	37.0171	0.0697207	2.1622	0.00306125	0.906922	0.00122443	44.835	1.2225	0.0415086	0.00128049
13	2020-11-16	NIST612	17	17.1522	0.0761828	15.5666	0.070947	37.0614	0.154087	2.16081	0.00496322	0.907574	0.00192969	32.9042	0.728281	0.0513678	0.00084047
13	2020-11-16	NIST612	18	17.1086	0.0450334	15.5191	0.0436035	36.9924	0.0932095	2.1628	0.00237485	0.907341	0.00102988	38.8396	1.45744	0.0465923	0.00152324
13	2020-11-16	NIST612	19	17.0688	0.054977	15.4955	0.0566666	37.0277	0.117417	2.16934	0.00241413	0.907826	0.00139032	44.5194	1.33939	0.0414706	0.00143816
13	2020-11-16	NIST612	20	17.0888	0.048754	15.5308	0.0485908	37.0515	0.0919974	2.16821	0.0032812	0.908832	0.00143441	43.5899	1.47287	0.0431948	0.00141152
13	2020-11-16	NIST612	21	17.0441	0.0746709	15.4862	0.0740406	36.9136	0.14901	2.1658	0.00322431	0.908597	0.00181564	44.1583	1.29145	0.0410238	0.00166069
13	2020-11-16	NIST612	22	17.0711	0.0672259	15.483	0.0651481	36.9735	0.145966	2.16586	0.00306006	0.906973	0.00125655	46.1665	0.939548	0.0382492	0.00122179
14	2021-04-19	NIST612	1	17.0748	0.0364137	15.4905	0.0296658	36.9636	0.0663437	2.16483	0.00278471	0.906722	0.00172164	34.464	1.27713	0.0505513	0.00166672
14	2021-04-19	NIST612	2	17.0605	0.0611437	15.4951	0.0491779	36.9703	0.113858	2.16704	0.0028821	0.908263	0.00181427	46.8845	1.20697	0.0326082	0.000734135
14	2021-04-19	NIST612	3	17.0865	0.0405403	15.5119	0.0389837	37.0094	0.0875106	2.1657	0.00142044	0.907851	0.000937683	41.769	1.83725	0.0382459	0.0013038
14	2021-04-19	NIST612	4	17.0976	0.0389337	15.4976	0.0325562	36.9978	0.0792361	2.16394	0.00145526	0.906253	0.000754586	42.5867	1.92097	0.0388608	0.00142839
14	2021-04-19	NIST612	5	17.0854	0.0389237	15.5	0.030006	36.9682	0.0713939	2.16376	0.00189653	0.907223	0.00105471	42.0951	1.93306	0.0379375	0.00127954
14	2021-04-19	NIST612	6	17.0658	0.0350004	15.4878	0.0363545	36.9571	0.0656298	2.16546	0.0018022	0.907025	0.00107428	46.7581	1.75698	0.0354862	0.000943723
14	2021-04-19	NIST612	7	17.0472	0.0382409	15.491	0.0402091	36.9199	0.0749939	2.16572	0.0016648	0.908236	0.00101161	40.9571	1.7015	0.0391946	0.00128629
14	2021-04-19	NIST612	8	17.1257	0.0368908	15.5444	0.0340906	37.0685	0.0764467	2.16512	0.00200857	0.907672	0.00121153	43.9923	1.67614	0.0368431	0.0011006
14	2021-04-19	NIST612	9	17.0994	0.0258866	15.5226	0.0263328	37.032	0.0584541	2.16641	0.00167983	0.90809	0.000871706	40.7577	1.77098	0.0381003	0.00113845
14	2021-04-19	NIST612	10	17.0811	0.0420518	15.4786	0.0323228	36.944	0.073331	2.16408	0.00167915	0.906797	0.00103261	43.7647	1.67463	0.0365707	0.00102859
14	2021-04-19	NIST612	11	17.1041	0.0305161	15.5223	0.0292083	37.0283	0.0666001	2.16489	0.00169869	0.907361	0.000758491	41.5715	1.86832	0.0382867	0.00120768
14	2021-04-19	NIST612	12	17.1125	0.0351729	15.5249	0.0331635	37.0346	0.0816433	2.16419	0.00206782	0.907453	0.00103818	41.354	1.79727	0.0373156	0.00113948
14	2021-04-19	NIST612	13	17.0975	0.0545002	15.5146	0.050579	37.0054	0.115475	2.16438	0.00205846	0.907417	0.000943546	46.2964	1.56618	0.034508	0.00082761
14	2021-04-19	NIST612	14	17.124	0.0344255	15.5383	0.0336673	37.0673	0.0702003	2.16465	0.00162013	0.907403	0.000946469	42.1687	1.84355	0.0367407	0.00104263
14	2021-04-19	NIST612	15	17.1033	0.0388844	15.5201	0.0350138	37.0375	0.0820887	2.16553	0.00192003	0.907438	0.000879741	40.6257	1.77488	0.0373693	0.00104902
14	2021-04-19	NIST612	16	17.0948	0.0324939	15.5062	0.0295304	37.0109	0.0644082	2.16509	0.00194217	0.907441	0.000877558	41.8456	1.8384	0.0370111	0.00111691
14	2021-04-19	NIST612	17	17.0951	0.034663	15.5085	0.0316599	36.9671	0.0712074	2.16342	0.00162853	0.907604	0.000918167	41.598	1.83837	0.0370923	0.0011166
14	2021-04-19	NIST612	18	17.1239	0.0354837	15.5343	0.0338039	37.0616	0.0645568	2.16514	0.00205963	0.907175	0.00107635	41.566	1.82717	0.0365169	0.0011173
14	2021-04-19	NIST612	19	17.1017	0.0345318	15.5019	0.0286853	36.9868	0.0689269	2.16277	0.00146595	0.906465	0.000975027	41.1474	1.85757	0.0363245	0.00104806
15	2021-04-20	NIST612	1	17.1183	0.0542093	15.5223	0.0540181	37.0297	0.117433	2.16317	0.00267133	0.906768	0.00162004	44.8159	0.803415	0.0446388	0.000574829
15	2021-04-20	NIST612	2	17.098	0.0345231	15.5086	0.0326052	36.9742	0.0661806	2.16299	0.00163654	0.907465	0.00100063	37.1743	1.69459	0.0449778	0.00148557
15	2021-04-20	NIST612	3	17.0761	0.0302993	15.4695	0.0267918	36.9054	0.0590156	2.16125	0.00204823	0.905924	0.00108855	37.6096	1.68485	0.0434168	0.00142449
15	2021-04-20	NIST612	4	17.1077	0.0387972	15.5042	0.033867	36.9652	0.0803813	2.16033	0.00175184	0.906483	0.000949199	37.5676	1.7062	0.0438419	0.00145226
15	2021-04-20	NIST612	5	17.1333	0.0617857	15.5313	0.0530247	37.0342	0.120877	2.16155	0.0029133	0.90651	0.00207975	30.5004	0.698023	0.0703057	0.00119943
15	2021-04-20	NIST612	6	17.0779	0.0315969	15.4913	0.0293257	36.9365	0.0632643	2.16285	0.00168668	0.906862	0.00100799	37.9107	1.69556	0.0418945	0.00127711
15	2021-04-20	NIST612	7	17.1152	0.0321385	15.5115	0.0361614	36.9935	0.0737234	2.16192	0.00195492	0.906692	0.0011179	37.4409	1.53604	0.0420511	0.00126256
15	2021-04-20	NIST612	8	17.1114	0.0451457	15.5253	0.0425118	36.9827	0.100657	2.1613	0.00248435	0.907311	0.00117488	41.0198	1.41999	0.0379771	0.000981221
15	2021-04-20	NIST612	9	17.0961	0.0363906	15.5009	0.0298661	36.9373	0.0714704	2.1606	0.00155299	0.906895	0.000828886	38.1809	1.71056	0.0403942	0.0011848
15	2021-04-20	NIST612	10	17.1098	0.0372683	15.5093	0.0384945	36.9722	0.0839443	2.16232	0.00172946	0.907112	0.000998934	36.2468	1.62406	0.0417577	0.00129493
15	2021-04-20	NIST612	11	17.0973	0.0368632	15.4843	0.0328912	36.9456	0.0812096	2.16092	0.00229584	0.905667	0.00104892	37.3125	1.54328	0.0398018	0.00113748
15	2021-04-20	NIST612	12	17.0749	0.0353037	15.4695	0.0308109	36.8723	0.0760974	2.15946	0.00201791	0.906231	0.000881586	37.0073	1.65397	0.0413676	0.00126196
15	2021-04-20	NIST612	13	17.0747	0.0357525	15.4843	0.0284138	36.9055	0.0690405	2.16145	0.00189914	0.906873	0.00106309	36.7668	1.64515	0.0400414	0.00121988
15	2021-04-20	NIST612	14	17.0742	0.0349405	15.4909	0.0298835	36.9431	0.0691616	2.16371	0.0018735	0.907283	0.00102181	37.394	1.68989	0.0393541	0.00127219
15	2021-04-20	NIST612	15	17.097	0.0419939	15.5031	0.0387052	36.9515	0.0851567	2.1613	0.00237088	0.906779	0.00127098	31.1337	1.03657	0.0442538	0.00127951
15	2021-04-20	NIST612	16	17.0802	0.0462883	15.4887	0.0539269	36.943	0.104318	2.16381	0.00253731	0.907335	0.00160524	31.7885	1.03758	0.0417638	0.000846933
15	2021-04-20	NIST612	17	17.0946	0.035134	15.4939	0.03252	36.9472	0.0747652	2.16135	0.00184386	0.906368	0.00099764	36.9669	1.61619	0.0375632	0.00107124
16	2022-05-03	NIST612	1	16.7775	0.294123	15.2539	0.261492	36.5234	0.653512	2.17093	0.00836165	0.907378	0.0043224	43.5723	1.4063	0.0408254	0.00651563
16	2022-05-03	NIST612	2	17.1649	0.298497	15.5891	0.279893	37.1292	0.660745	2.15513	0.00668134	0.906976	0.00298113	45.9655	1.76854	0.0446451	0.00680098
16	2022-05-03	NIST612	3	17.0129	0.217083	15.4372	0.243353	36.7447	0.476347	2.16936	0.00627134	0.904331	0.00436925	47.7062	1.97291	0.0516522	0.00501608
16	2022-05-03	NIST612	4	16.934	0.300255	15.259	0.241268	36.61	0.655031	2.16197	0.00828531	0.902861	0.00468432	48.2377	1.90496	0.051038	0.00531586
16	2022-05-03	NIST612	5	17.0689	0.24632	15.4451	0.234495	36.9972	0.526919	2.17579	0.00654851	0.905264	0.00301558	48.3045	1.79445	0.043239	0.00426355
16	2022-05-03	NIST612	6	17.2977	0.284959	15.7053	0.247334	37.4184	0.600199	2.1556	0.00888876	0.908521	0.00340102	48.4095	1.64113	0.0452932	0.00636929
16	2022-05-03	NIST612	7	16.9025	0.307094	15.3876	0.26997	36.7901	0.671246	2.17263	0.00756033	0.908645	0.00363816	44.682	1.47258	0.0495746	0.00725457
16	2022-05-03	NIST612	8	17.0789	0.24345	15.6577	0.211928	37.6061	0.508458	2.18612	0.00800071	0.913065	0.00385417	44.85	1.61462	0.0478225	0.00639957
16	2022-05-03	NIST612	9	17.1398	0.281266	15.5325	0.236793	37.1213	0.578538	2.16921	0.00686813	0.905982	0.00351849	48.0603	1.49016	0.0448952	0.00455279
16	2022-05-03	NIST612	10	16.939	0.242366	15.2871	0.230002	36.617	0.542178	2.1696	0.00771355	0.907553	0.00388686	48.6656	1.50406	0.0407888	0.00656833
16	2022-05-03	NIST612	11	16.9278	0.298586	15.2575	0.269738	36.4236	0.615946	2.15702	0.00688571	0.905576	0.00367237	48.3903	1.62767	0.0511496	0.00647547
16	2022-05-03	NIST612	12	17.3667	0.266259	15.7391	0.25496	37.7173	0.58751	2.1641	0.00712748	0.903256	0.00402695	49.2336	1.62556	0.0523149	0.0054217
16	2022-05-03	NIST612	13	17.2011	0.324414	15.6091	0.290686	37.2161	0.715193	2.15468	0.00984983	0.905519	0.00379601	44.3789	1.39721	0.0505937	0.00690804
16	2022-05-03	NIST612	14	17.1899	0.321186	15.5351	0.281613	37.1514	0.699913	2.16385	0.00664559	0.905366	0.00326921	43.5215	1.58615	0.0495068	0.00542573
16	2022-05-03	NIST612	15	17.2537	0.314331	15.5575	0.277229	37.1615	0.694434	2.15082	0.00894284	0.901438	0.00384743	46.4376	1.70465	0.0498556	0.00565651
16	2022-05-03	NIST612	16	17.0786	0.287331	15.409	0.250526	36.8809	0.591933	2.15892	0.00791978	0.903001	0.00305445	47.478	1.60549	0.0471956	0.00507833
16	2022-05-03	NIST612	17	17.0059	0.371403	15.3718	0.318972	36.7372	0.766947	2.16323	0.0079996	0.906628	0.003971	47.6004	1.59942	0.0486269	0.00510271
16	2022-05-03	NIST612	18	16.8695	0.324417	15.3099	0.259239	36.4743	0.709092	2.16162	0.00740524	0.903938	0.00395316	48.1468	1.58023	0.0413256	0.00556414
16	2022-05-03	NIST612	19	17.362	0.285283	15.8359	0.26927	37.6259	0.599251	2.16335	0.00786084	0.909281	0.00374545	45.9459	1.23464	0.0446583	0.00524866
16	2022-05-03	NIST612	20	17.0821	0.265611	15.6631	0.245345	36.9145	0.590003	2.15229	0.00637434	0.904545	0.00376565	43.4003	1.31758	0.04921	0.0060401
16	2022-05-03	NIST612	21	17.2652	0.259642	15.7721	0.245267	37.3201	0.578287	2.15657	0.00836955	0.906387	0.00452977	46.5378	1.23231	0.0518517	0.00578787
16	2022-05-03	NIST612	22	17.1974	0.255363	15.567	0.222886	37.3605	0.546564	2.16477	0.00569576	0.903749	0.00272923	45.8924	1.65059	0.0480551	0.00536547
16	2022-05-03	NIST612	23	17.1994	0.279691	15.5839	0.249253	37.4384	0.596391	2.17069	0.00806464	0.90532	0.00455222	46.4239	1.51147	0.0480437	0.00592248
16	2022-05-03	NIST612	24	17.1314	0.325069	15.4765	0.286404	37.1827	0.657751	2.16878	0.00820694	0.904908	0.00361573	46.7551	1.59807	0.0496124	0.0047728
17	2022-06-27	NIST612	1	17.1216	0.129207	15.4803	0.121316	37.1367	0.282096	2.16833	0.0042487	0.903957	0.00185057	36.2968	1.00579	0.0578408	0.0028754
17	2022-06-27	NIST612	2	17.0613	0.0958151	15.4806	0.080101	36.8917	0.202047	2.16199	0.00317543	0.906763	0.00189989	38.603	0.963963	0.0540477	0.00320645
17	2022-06-27	NIST612	3	17.278	0.122816	15.6441	0.102261	37.3895	0.260003	2.16372	0.00352868	0.90529	0.00179719	38.5451	0.92464	0.0546529	0.00258793
17	2022-06-27	NIST612	4	17.0803	0.146019	15.5024	0.130596	36.94	0.307306	2.1629	0.00298885	0.906465	0.00201292	38.8008	0.843404	0.0514527	0.00248088
17	2022-06-27	NIST612	5	17.0451	0.13851	15.433	0.122085	36.8476	0.293406	2.16201	0.00334324	0.905677	0.00173383	37.6996	0.896421	0.0545536	0.0028619
17	2022-06-27	NIST612	6	17.1052	0.156019	15.5543	0.11123	37.1586	0.26635	2.1669	0.00397551	0.907103	0.00159435	37.4846	0.754593	0.0518441	0.00225275
17	2022-06-27	NIST612	7	17.0625	0.153887	15.5243	0.146531	36.9858	0.324323	2.16874	0.00320918	0.909533	0.00231514	34.433	0.836177	0.0611828	0.00302392
17	2022-06-27	NIST612	8	17.0838	0.124121	15.49	0.10514	36.9737	0.257907	2.16418	0.00441504	0.907051	0.00158719	37.426	0.873305	0.0555146	0.00260044
17	2022-06-27	NIST612	9	17.0913	0.139444	15.4889	0.116189	36.9521	0.279705	2.16255	0.00401343	0.906406	0.00234623	37.8921	0.688048	0.0539394	0.00318267
17	2022-06-27	NIST612	10	17.1118	0.131987	15.5465	0.12235	37.0669	0.289702	2.1656	0.00397012	0.907578	0.00226469	35.5558	0.87079	0.0537044	0.00266836
17	2022-06-27	NIST612	11	17.0384	0.157586	15.4354	0.148833	36.8737	0.344096	2.16426	0.00385009	0.906329	0.00124489	38.3188	0.601121	0.0464289	0.00258544
17	2022-06-27	NIST612	12	17.0687	0.133813	15.4697	0.113542	36.9717	0.282625	2.1661	0.0037807	0.906516	0.00204325	35.632	0.896946	0.0509223	0.00270008
17	2022-06-27	NIST612	13	17.2398	0.156965	15.6514	0.147478	37.3169	0.340868	2.16434	0.00404229	0.907461	0.00199727	37.7012	0.846535	0.0517973	0.00254091
17	2022-06-27	NIST612	14	17.0178	0.121417	15.4361	0.11177	36.7989	0.252383	2.16345	0.00333164	0.907419	0.00169437	36.5926	0.801172	0.0508524	0.00208799
18	2022-07-06	NIST612	1	17.0435	0.089805	15.4609	0.0828439	37.0019	0.15574	2.17414	0.00298658	0.907153	0.0016392	43.2588	1.89167	0.131552	0.00522964
18	2022-07-06	NIST612	2	17.0851	0.0768303	15.4684	0.0749804	37.0924	0.159456	2.17107	0.00268326	0.905371	0.00134791	44.7643	1.9887	0.130873	0.00504585
18	2022-07-06	NIST612	3	17.0938	0.0967587	15.463	0.0905466	37.0497	0.204473	2.16746	0.00339369	0.904601	0.00167007	49.0618	1.82645	0.116419	0.0033612
18	2022-07-06	NIST612	4	17.104	0.135048	15.4246	0.112277	37.078	0.266944	2.16785	0.00367934	0.90184	0.00234044	49.9055	1.40828	0.114655	0.00350771
18	2022-07-06	NIST612	5	17.1147	0.0764326	15.4698	0.0723914	37.1414	0.157737	2.17021	0.00322363	0.903892	0.00145824	43.4075	2.34553	0.131569	0.00561731
18	2022-07-06	NIST612	6	17.1458	0.0884039	15.4794	0.079375	37.1219	0.195385	2.16508	0.00261138	0.902394	0.00143493	47.4739	1.84705	0.121266	0.00440047
18	2022-07-06	NIST612	7	17.1281	0.094799	15.4942	0.0806747	37.1188	0.181217	2.1672	0.00351821	0.904634	0.00205863	48.4021	2.04613	0.119735	0.00423129
18	2022-07-06	NIST612	8	17.0956	0.0848337	15.4921	0.0705618	37.138	0.168127	2.17156	0.00243662	0.905772	0.00125561	50.9819	2.05586	0.114585	0.00394767
18	2022-07-06	NIST612	9	17.0716	0.0584355	15.4692	0.0577991	37.1322	0.128567	2.17544	0.00272974	0.906131	0.00135323	41.5928	2.37422	0.138278	0.00618067
18	2022-07-06	NIST612	10	17.12	0.108262	15.4404	0.101553	37.1173	0.225583	2.16809	0.00468805	0.901896	0.00210471	47.7788	1.68408	0.120575	0.00360391
18	2022-07-06	NIST612	11	17.1238	0.0686506	15.4675	0.0707559	37.071	0.13791	2.16491	0.00411925	0.903272	0.00215899	49.7174	1.51056	0.118647	0.0033228
18	2022-07-06	NIST612	12	17.1016	0.0944354	15.5002	0.0829497	37.1532	0.191454	2.17256	0.00352961	0.906382	0.00193337	47.4457	2.0097	0.122878	0.00456475
18	2022-07-06	NIST612	13	17.0801	0.100461	15.5114	0.0932337	37.0245	0.235141	2.16768	0.00323952	0.908159	0.00164565	49.1599	1.3282	0.117083	0.00336647
18	2022-07-06	NIST612	14	17.0301	0.0880454	15.4519	0.0841129	36.9647	0.18011	2.1706	0.00277251	0.90733	0.00154652	43.1876	1.99317	0.13317	0.00493889
18	2022-07-06	NIST612	15	17.0718	0.0757433	15.4416	0.0686521	37.0451	0.159897	2.16999	0.00250663	0.904265	0.000983366	36.4013	1.93033	0.156349	0.00622134
18	2022-07-06	NIST612	16	17.1482	0.0560993	15.516	0.0532207	37.0935	0.128189	2.16311	0.00225476	0.904035	0.00116102	45.4191	2.13769	0.131157	0.0051476
18	2022-07-06	NIST612	17	17.1483	0.0874623	15.5307	0.0761682	37.1687	0.181684	2.16753	0.00304644	0.905684	0.00117387	46.4919	1.91044	0.125179	0.00429224
18	2022-07-06	NIST612	18	17.1286	0.0820183	15.5759	0.0737711	37.2588	0.177021	2.17527	0.00274043	0.909369	0.0012627	42.0727	2.10208	0.139258	0.00582449
18	2022-07-06	NIST612	19	17.0732	0.0895543	15.4862	0.0851742	36.9249	0.164326	2.16611	0.00352633	0.907046	0.00135994	47.2951	1.93211	0.125921	0.00413739
19	2022-08-15	NIST612	1	17.1455	0.143742	15.5864	0.129501	37.2031	0.305975	2.16976	0.00363329	0.909244	0.00116956	49.1613	2.88104	0.0928192	0.00599204
19	2022-08-15	NIST612	2	17.233	0.104094	15.6492	0.0966301	37.3241	0.229405	2.16532	0.00370564	0.907998	0.00151673	39.7344	2.90687	0.101844	0.00641033
19	2022-08-15	NIST612	3	17.2394	0.0991144	15.6387	0.0942324	37.3459	0.213724	2.1659	0.00232739	0.907059	0.00134044	40.9018	2.81864	0.0995452	0.0054648
19	2022-08-15	NIST612	4	17.1088	0.11771	15.5177	0.1146	37.1053	0.252357	2.16852	0.00337932	0.906969	0.00180889	39.6219	2.89342	0.0896197	0.00592014
19	2022-08-15	NIST612	5	17.209	0.108746	15.6273	0.103234	37.3529	0.247287	2.17185	0.00315225	0.908102	0.0016977	39.0329	3.01431	0.0949339	0.0053075
19	2022-08-15	NIST612	6	17.2021	0.101798	15.6355	0.0789504	37.3219	0.193174	2.1647	0.00311101	0.906974	0.00138648	38.5002	2.98901	0.086212	0.00360926
19	2022-08-15	NIST612	7	17.1086	0.132526	15.5448	0.116767	37.037	0.278263	2.16558	0.00338719	0.908502	0.00146332	38.4944	2.69173	0.0830475	0.00411667
19	2022-08-15	NIST612	8	17.2059	0.107745	15.6159	0.101559	37.288	0.249162	2.16657	0.00337791	0.90803	0.00157424	47.5218	3.09247	0.0767399	0.00423247
19	2022-08-15	NIST612	9	16.99	0.157064	15.3973	0.139647	36.7138	0.325038	2.15916	0.00351238	0.906189	0.00157303	55.692	2.64637	0.0702698	0.00436634
19	2022-08-15	NIST612	10	17.0022	0.124156	15.4116	0.11284	36.8867	0.271513	2.17175	0.00283728	0.906195	0.00191678	38.6442	2.66902	0.0790737	0.00428161
19	2022-08-15	NIST612	11	17.2402	0.136879	15.652	0.114415	37.2879	0.272619	2.16215	0.00321498	0.908079	0.00161744	44.4659	3.25151	0.0880406	0.00590749
19	2022-08-15	NIST612	12	17.2788	0.116555	15.6707	0.105764	37.4655	0.248488	2.16726	0.00288034	0.907257	0.00139852	49.7735	2.8052	0.0705524	0.00599427
19	2022-08-15	NIST612	13	17.0292	0.0834676	15.4796	0.0728542	36.9859	0.175843	2.17281	0.0029459	0.908684	0.00143934	47.2233	2.7351	0.0707075	0.00405751
19	2022-08-15	NIST612	14	16.8703	0.151557	15.3377	0.140106	36.5299	0.326081	2.16705	0.0050292	0.909844	0.00220815	49.9807	2.63557	0.0666817	0.00316306
19	2022-08-15	NIST612	15	16.9092	0.109267	15.3328	0.0976813	36.5716	0.220001	2.16261	0.00315591	0.906319	0.00171547	39.2833	3.0289	0.0691457	0.00415276
19	2022-08-15	NIST612	16	17.1869	0.126148	15.6274	0.109224	37.3273	0.261841	2.17011	0.00323681	0.90914	0.0014956	38.5336	2.78181	0.0758033	0.00435645
19	2022-08-15	NIST612	17	17.1801	0.116844	15.602	0.0838218	37.2974	0.195748	2.17704	0.00375012	0.91104	0.0017673	51.3712	2.57204	0.063143	0.00352272
19	2022-08-15	NIST612	18	17.2037	0.135566	15.6531	0.119674	37.3593	0.29366	2.17085	0.00265264	0.91011	0.00148249	34.3265	2.52352	0.0788447	0.00501328
19	2022-08-15	NIST612	19	16.8804	0.104638	15.2899	0.092274	36.4055	0.216902	2.15592	0.00346006	0.90523	0.00158237	43.2692	2.96593	0.0703842	0.00430214
19	2022-08-15	NIST612	20	16.7661	0.094189	15.1957	0.0923079	36.21	0.205609	2.16053	0.00227602	0.906617	0.00135153	38.989	3.13085	0.0720885	0.00467155
20	2022-08-16	NIST612	1	17.107	0.0775557	15.5372	0.0692309	37.0542	0.174341	2.16629	0.00255468	0.908379	0.00121876	44.7957	3.04371	0.0529575	0.00296224
20	2022-08-16	NIST612	2	17.0573	0.0706527	15.4858	0.0624957	36.9507	0.14796	2.16967	0.00269218	0.908984	0.000999788	49.4734	3.38768	0.0500188	0.00235907
20	2022-08-16	NIST612	3	17.0527	0.0865015	15.475	0.0817059	36.995	0.184975	2.16828	0.00226517	0.9075	0.00140692	44.1152	3.50119	0.0552046	0.00283456
20	2022-08-16	NIST612	4	17.0993	0.0794884	15.5293	0.0743878	37.1034	0.173483	2.16946	0.00333716	0.908194	0.00120639	46.7993	3.60253	0.0529024	0.00278731
20	2022-08-16	NIST612	5	17.0218	0.0925505	15.4066	0.0803512	36.8139	0.182493	2.16294	0.00259836	0.905044	0.00115834	51.5477	3.47577	0.0493719	0.00255397
20	2022-08-16	NIST612	6	17.0711	0.0569225	15.5032	0.0532694	37.0721	0.118802	2.17166	0.0020583	0.908293	0.00120836	45.3869	3.54521	0.0559809	0.00272135
20	2022-08-16	NIST612	7	17.0626	0.0815921	15.4816	0.0746316	37.0177	0.1853	2.16981	0.00268709	0.907392	0.00111598	43.3304	3.50533	0.0554793	0.00316789
20	2022-08-16	NIST612	8	17.1239	0.0991609	15.5474	0.0910461	37.0853	0.212158	2.16634	0.0025458	0.907983	0.00128487	43.754	3.31009	0.0503033	0.00272142
20	2022-08-16	NIST612	9	17.0241	0.147588	15.4326	0.131161	36.9327	0.317791	2.17011	0.00325912	0.906531	0.00201501	29.2482	1.88386	0.0647654	0.00312706
20	2022-08-16	NIST612	10	17.0759	0.116701	15.4769	0.104938	36.9724	0.241766	2.16524	0.00232974	0.906207	0.00124102	43.4225	3.37383	0.0502596	0.00216246
20	2022-08-16	NIST612	11	17.1266	0.0947997	15.5524	0.0890283	37.1204	0.20268	2.16746	0.00284048	0.90849	0.00130373	38.3058	3.31399	0.044597	0.00175911
20	2022-08-16	NIST612	12	17.0678	0.101105	15.4639	0.0875409	36.916	0.208695	2.16295	0.00235414	0.906257	0.00124997	44.3882	3.16946	0.0403657	0.00135332
20	2022-08-16	NIST612	13	17.116	0.107302	15.5094	0.11758	36.9725	0.272407	2.16532	0.00363439	0.908323	0.00160616	28.9546	1.9497	0.050987	0.00243553
20	2022-08-16	NIST612	14	17.0667	0.103444	15.5259	0.0771131	37.0171	0.211718	2.16915	0.00316997	0.908118	0.00130555	41.7263	3.4055	0.0464553	0.00246588
20	2022-08-16	NIST612	15	17.1543	0.0937299	15.5182	0.0821376	37.1153	0.195283	2.16465	0.00276203	0.905459	0.00148805	36.7113	3.2436	0.0473065	0.00202203
20	2022-08-16	NIST612	16	17.1074	0.102673	15.5065	0.100178	37.0295	0.241271	2.16436	0.00288299	0.905996	0.00118758	37.4586	3.21123	0.0520691	0.00242875
20	2022-08-16	NIST612	17	17.1624	0.0702754	15.5422	0.0687128	37.142	0.150248	2.16413	0.00317566	0.905617	0.00107034	36.5959	3.17671	0.0505245	0.00249909
20	2022-08-16	NIST612	18	17.1248	0.0831798	15.5633	0.0819298	37.1591	0.189324	2.16998	0.00291909	0.908695	0.00159996	36.3611	3.2176	0.0499883	0.00270336
20	2022-08-16	NIST612	19	17.1439	0.0929715	15.5425	0.0806417	37.1309	0.187939	2.16574	0.00288219	0.906903	0.0010054	36.1459	3.216	0.0553852	0.00269408
20	2022-08-16	NIST612	20	17.0695	0.0948261	15.4986	0.0832365	36.9766	0.196542	2.167	0.00314839	0.908524	0.00170231	39.6258	3.16233	0.0540568	0.00277645
21	2022-08-17	NIST612	1	17.0749	0.139811	15.4538	0.126187	36.7381	0.299446	2.15007	0.00305211	0.904559	0.001099	39.1472	4.06947	0.081457	0.00662744
21	2022-08-17	NIST612	2	17.0294	0.0794297	15.4569	0.0706426	36.9015	0.159081	2.16888	0.00276009	0.907979	0.00144885	41.5766	3.92206	0.0688012	0.00491368
21	2022-08-17	NIST612	3	17.1424	0.0749572	15.5439	0.0616619	37.0929	0.159931	2.16426	0.00288922	0.907191	0.00129146	44.9261	3.7609	0.066474	0.0047838
21	2022-08-17	NIST612	4	17.0489	0.115924	15.4528	0.107599	36.9264	0.248525	2.16572	0.00294922	0.905853	0.00126912	42.8957	3.70186	0.062945	0.00494528
21	2022-08-17	NIST612	5	17.0349	0.0910864	15.4494	0.0760436	36.9299	0.185894	2.16662	0.0022995	0.907316	0.00125583	41.5676	4.03324	0.0677682	0.00480996
21	2022-08-17	NIST612	6	16.9803	0.0906622	15.3943	0.0861689	36.7708	0.201891	2.16611	0.00268543	0.906685	0.00144361	39.8318	3.65679	0.0655828	0.0041019
21	2022-08-17	NIST612	7	17.0902	0.084579	15.4597	0.0778671	36.9504	0.183127	2.16354	0.00357528	0.904707	0.0013942	39.1853	3.79778	0.0689152	0.00519761
21	2022-08-17	NIST612	8	17.1268	0.101103	15.5017	0.0795194	37.0077	0.219595	2.16113	0.00329056	0.904102	0.00165448	39.8636	3.79529	0.065833	0.00508543
21	2022-08-17	NIST612	9	17.0287	0.107645	15.4586	0.106398	36.9427	0.25227	2.1652	0.00276125	0.905791	0.00136386	38.1269	3.65056	0.0695478	0.00516848
21	2022-08-17	NIST612	10	17.0994	0.0989811	15.5034	0.0990326	37.0928	0.217365	2.1697	0.00314344	0.907226	0.00124716	38.153	3.63465	0.0657377	0.00449895
21	2022-08-17	NIST612	11	16.9967	0.10931	15.4051	0.104458	36.8195	0.244442	2.16638	0.00283849	0.90707	0.00123861	40.1417	3.50132	0.0627542	0.004088
21	2022-08-17	NIST612	12	17.1135	0.102488	15.494	0.089786	37.0792	0.213504	2.16436	0.00261667	0.904747	0.00128288	36.764	3.44561	0.0645407	0.00464535
21	2022-08-17	NIST612	13	17.1001	0.0938327	15.4708	0.0945715	37.0055	0.206243	2.16309	0.00296559	0.905325	0.00150139	36.5988	3.50962	0.0602453	0.00538711
21	2022-08-17	NIST612	14	17.0716	0.108391	15.4602	0.0913456	36.9297	0.218577	2.16272	0.00265216	0.90551	0.00184133	36.6317	3.70655	0.0641328	0.00488945
21	2022-08-17	NIST612	15	17.1572	0.111655	15.5554	0.0994421	37.1184	0.243712	2.16343	0.00307036	0.907019	0.00147781	37.7233	3.55531	0.0611393	0.00449691
21	2022-08-17	NIST612	16	17.0293	0.0915081	15.4103	0.0814345	36.8373	0.191715	2.16451	0.00257976	0.906062	0.00131454	35.4726	3.39124	0.0652461	0.0053539
21	2022-08-17	NIST612	17	17.0611	0.102493	15.4424	0.0871944	36.8578	0.222609	2.16006	0.00354007	0.905082	0.00144505	35.849	3.31725	0.0665366	0.00512552
21	2022-08-17	NIST612	18	17.1541	0.108565	15.5562	0.0951724	37.1125	0.222124	2.1645	0.0034939	0.906872	0.00167579	45.1537	3.68424	0.0511679	0.00397709
21	2022-08-17	NIST612	19	17.0427	0.0982313	15.4252	0.0878699	36.907	0.204693	2.16577	0.00334158	0.90641	0.00137816	35.9426	3.35788	0.0603546	0.00436794
21	2022-08-17	NIST612	20	17.1491	0.109938	15.5748	0.100726	37.1608	0.233855	2.16569	0.00321577	0.906875	0.00136807	38.1769	3.40199	0.0588026	0.0040705
21	2022-08-17	NIST612	21	17.0002	0.127057	15.4159	0.110288	36.8003	0.269667	2.16501	0.00340778	0.907016	0.00127238	35.7434	3.4121	0.061248	0.00403495
21	2022-08-17	NIST612	22	17.1772	0.127058	15.5823	0.108259	37.1545	0.265803	2.16438	0.00326427	0.907891	0.00176086	40.4114	3.48636	0.0538994	0.00324658
22	2022-11-02	NIST612	1	17.0109	0.125392	15.4761	0.128307	36.8714	0.285474	2.16433	0.00410568	0.907528	0.00172841	44.7054	4.45664	0.0677075	0.00655499
22	2022-11-02	NIST612	2	17.0918	0.165588	15.4683	0.143539	36.976	0.3225	2.15876	0.0032725	0.904437	0.00170655	46.1367	4.10335	0.0707921	0.006594
22	2022-11-02	NIST612	3	17.1172	0.130878	15.5193	0.111492	36.9549	0.268921	2.15537	0.00341351	0.905271	0.00154376	47.9239	4.34605	0.0664582	0.00682425
22	2022-11-02	NIST612	4	17.1357	0.160366	15.5304	0.146766	37.0924	0.35937	2.16162	0.00309425	0.905883	0.00163408	45.0542	4.51419	0.0678681	0.00674063
22	2022-11-02	NIST612	5	17.037	0.124863	15.4433	0.111328	36.8263	0.277714	2.16137	0.00374558	0.906704	0.00185794	62.8647	3.42669	0.0505181	0.00344994
22	2022-11-02	NIST612	6	17.1909	0.142344	15.5948	0.128032	37.2786	0.324659	2.16685	0.00544359	0.90716	0.00249461	43.3012	3.33431	0.0591804	0.00549475
22	2022-11-02	NIST612	7	17.1522	0.136486	15.5993	0.132803	37.1388	0.295519	2.16518	0.00363935	0.906853	0.00158034	49.529	4.24551	0.0612425	0.00483026
22	2022-11-02	NIST612	8	17.0946	0.130021	15.467	0.119575	36.9448	0.29155	2.1646	0.00360275	0.905166	0.00169712	42.3445	4.09032	0.0619074	0.00667672
22	2022-11-02	NIST612	9	17.0775	0.151797	15.4538	0.149695	36.9336	0.348871	2.16646	0.00329875	0.906521	0.0020394	39.3036	3.97319	0.0779448	0.00808899
22	2022-11-02	NIST612	10	17.0281	0.160434	15.4926	0.136061	36.9322	0.356037	2.16729	0.00377537	0.906886	0.00156485	41.5119	3.97778	0.0786297	0.0085189
22	2022-11-02	NIST612	11	16.999	0.131509	15.4206	0.122151	36.902	0.283021	2.16803	0.00329863	0.907841	0.00149406	42.2321	4.12606	0.0664706	0.00587887
22	2022-11-02	NIST612	12	17.0932	0.186054	15.4778	0.166053	36.9618	0.397772	2.16438	0.00335313	0.905943	0.00169138	39.865	4.00906	0.0709216	0.00705002
22	2022-11-02	NIST612	13	17.1634	0.155429	15.5554	0.149242	37.044	0.317775	2.16324	0.00377994	0.904855	0.00198831	38.1962	3.75053	0.0690353	0.00600821
22	2022-11-02	NIST612	14	17.0564	0.159314	15.497	0.143441	36.9579	0.36089	2.16499	0.0049448	0.907107	0.00217038	50.4465	3.35482	0.0533511	0.00424152
22	2022-11-02	NIST612	15	17.097	0.185647	15.5203	0.169142	37.0014	0.382198	2.16448	0.00398818	0.907777	0.0021437	36.6396	3.715	0.0722683	0.00764048
22	2022-11-02	NIST612	16	17.0193	0.141984	15.4741	0.128035	36.9687	0.291064	2.16507	0.00397616	0.906116	0.00195095	36.7528	3.82013	0.0709336	0.00682808
22	2022-11-02	NIST612	17	17.0766	0.17281	15.5088	0.161816	37.0395	0.376556	2.16634	0.00407302	0.907828	0.00167983	35.5125	3.44748	0.0738608	0.00674527
22	2022-11-02	NIST612	18	17.0548	0.236097	15.4769	0.215313	36.9043	0.518286	2.16426	0.00538916	0.907466	0.00289623	56.4075	2.16178	0.0395285	0.00567119

## Sheet: Dataset S2 - Summary Table
Dataset S2. Summary of the K-feldspar Pb isotope data for granites from the Yilgarn Craton. Data reported as mean and standard errors of N analyses from each sample.																										Zircon Hf isotope Data
#	Sample	Age	1σ	X	Y	N	206Pb204Pb	2 S.E.	2 S.D.	207Pb204Pb	2 S.E.	2 S.D.	208Pb204Pb	2 S.E.	2 S.D.		207Pb/206Pb	208Pb/206Pb	204Pb/206Pb	204Hg/204Total	Pb Conc. (ppm)	206Pb Source Age	207Pb Source Age	208Pb Source Age		176Hf/177Hf initial	1σ	CHUR_T	DM_T_4.5Ga	εHf	1σ	1σ-full	Tdm_4.5Ga
This Study
1	185929	2606	5	117.974	-26.6976	24	13.7439	0.0186	0.091121	14.8957	0.0151	0.0739746	33.584	0.034	0.166565		1.0838	2.44356	0.0727596	0.0282938	69	2720.25	3066.58	2812.31		0.280954	1.15016e-05	0.28111	0.281335	-5.5405	0.167718	2.16934	3.47205
2	168902	2621	5	120.115	-29.8364	19	13.9083	0.0252	0.109844	15.03	0.0192	0.0836909	33.8944	0.0425	0.185253		1.08065	2.43699	0.0718995	0.028317	66.5	2959.34	3320.38	3085.81		0.280866	1.40001e-05	0.2811	0.281324	-8.3373	0.248052	2.19669	3.66065
3	199047	2622	14	120.46	-32.1119	23	13.7661	0.0174	0.0834475	14.865	0.0128	0.0613866	33.4642	0.0284	0.136202		1.07983	2.43091	0.0726422	0.0381104	50.4	2798.74	3042.07	2759.67
4	207630	2626	6	117.138	-29.1457	26	13.5948	0.0281	0.143282	14.7271	0.0261	0.133084	33.3418	0.0557	0.284015		1.08329	2.45254	0.0735575	0.0288645	68	2609.21	2740.97	2675.13		0.280932	1.60003e-05	0.281097	0.28132	-5.8609	0.324	2.21872	3.50808
5	205935	2628	2	116.427	-32.3844	4	13.8121	0.0372	0.0744	14.8431	0.0216	0.0432	33.494	0.0446	0.0892		1.07464	2.42498	0.0724003	0.0218823	67.2	2871.56	3012.18	2797.42
6	142994	2632	4	120.549	-29.926	17	13.6512	0.014	0.0577235	14.7919	0.0171	0.0705051	33.3489	0.0313	0.129053		1.08356	2.44293	0.0732536	0.0222413	84.7	2696.54	2913.73	2695.51		0.280968	1.30003e-05	0.281093	0.281316	-4.42526	0.2139	2.19815	3.42186
7	193433	2634	3	123.027	-28.772	32	13.5594	0.0137	0.0774989	14.7234	0.0132	0.0746705	33.2495	0.0351	0.198556		1.08584	2.45214	0.0737496	0.0159714	90.8	2593.57	2755.18	2623.57
8	168970	2635	8	119.263	-29.0694	26	13.8279	0.0182	0.0928022	14.9207	0.0244	0.124416	33.648	0.0541	0.275857		1.07903	2.43334	0.0723176	0.0137853	43.6	2912.26	3171.32	2932.61
9	207529	2637	6	120.126	-31.6124	37	13.7597	0.0117	0.0711683	14.8761	0.0126	0.0766428	33.5475	0.0286	0.173967		1.08114	2.4381	0.072676	0.0477445	30.8	2840.12	3095.81	2860.66
10	224380	2638	5	116.686	-32.9375	11	13.9316	0.0245	0.0812573	14.885	0.0143	0.0474277	33.6447	0.0237	0.078604		1.06843	2.41499	0.0717793	0.0631551	37.2	3039.49	3114.27	2937.45
11	182783	2639	7	119.121	-31.3071	26	13.79	0.0185	0.0943319	14.833	0.018	0.0917824	33.4062	0.0366	0.186624		1.07563	2.42249	0.0725163	0.0270987	73.8	2881.6	3017.24	2757.05
12	207528	2641	9	120.335	-31.8683	20	13.6514	0.0263	0.117617	14.7688	0.0215	0.0961509	33.3256	0.0516	0.230762		1.08185	2.44119	0.0732526	0.0252674	60.2	2726.6	2885.08	2699.85
13	224339	2641	4	118.365	-33.8807	34	13.9859	0.0065	0.0379012	14.9823	0.0072	0.0419829	33.6705	0.0181	0.10554		1.07124	2.40746	0.0715006	0.0321317	52.2	3109.58	3282.84	2964.48
14	219901	2643	3	117.921	-33.5748	35	13.7963	0.0116	0.0686265	14.8543	0.0117	0.0692181	33.5177	0.0274	0.162101		1.07669	2.42947	0.0724832	0.041397	58.2	2901.74	3067.86	2852.6
15	207527	2643	7	120.268	-31.5881	27	13.779	0.0147	0.0763834	14.8862	0.0139	0.0722265	33.6204	0.037	0.192258		1.08035	2.43997	0.0725742	0.0346173	42.9	2881.85	3126.88	2931.16
16	179449	2643	3	123.425	-27.9925	14	13.7349	0.032	0.119733	14.8209	0.029	0.108508	33.6315	0.0704	0.263413		1.07907	2.44862	0.0728072	0.020462	59	2830.86	3002.16	2939.64		0.281138	1.2e-05	0.281085	0.281308	1.87442	0.182259	2.1999	3.02962
17	142810	2644	13	121.22	-27.4641	28	13.7605	0.0127	0.0672021	14.8148	0.0116	0.0613814	33.5729	0.0296	0.156628		1.07662	2.4398	0.0726718	0.0726315	29.3	2863.75	2992.07	2897.32
18	224316	2647	6	117.068	-33.8647	27	13.8007	0.0169	0.087815	14.8412	0.0121	0.0628734	33.5358	0.0285	0.14809		1.07539	2.43001	0.0724601	0.0376791	45	2919.65	3051.62	2876.31
19	178059	2647	4	119.93	-27.6018	28	13.9406	0.0203	0.107418	15.0402	0.017	0.0899555	33.9368	0.0403	0.213248		1.07888	2.43439	0.0717329	0.0182718	62.3	3077.85	3378.19	3181		0.280882	1.00001e-05	0.281083	0.281305	-7.14891	0.131635	2.18918	3.60607
20	178057	2648	6	119.55	-27.8989	32	13.9547	0.0104	0.0588313	15.0859	0.0104	0.0588313	33.9678	0.0177	0.100126		1.08106	2.43415	0.0716604	0.0115658	56.1	3096.71	3441.91	3206.79		0.280954	1.20001e-05	0.281082	0.281304	-4.56208	0.182264	2.1998	3.44313
21	169096	2649	4	119.961	-27.2603	23	13.9939	0.021	0.100712	15.0973	0.0181	0.0868046	34.0482	0.0399	0.191354		1.07885	2.43307	0.0714597	0.00641815	84.5	3143.33	3458.33	3269.67		0.28106	1.65e-05	0.281081	0.281303	-0.759448	0.344909	2.2402	3.20231
22	142815	2651	10	121.513	-26.5673	26	13.6016	0.0245	0.124926	14.697	0.0279	0.142263	33.4041	0.0588	0.299822		1.08053	2.45589	0.0735208	0.0391383	39.4	2700.9	2737.6	2785.12
23	182316	2653	3	123.857	-28.1543	35	13.7281	0.0171	0.101165	14.8059	0.0144	0.0851915	33.4886	0.0352	0.208246		1.07851	2.43942	0.0728433	0.0120302	43.3	2855.51	2995.3	2854.93
24	168974	2654	6	119.506	-29.7149	22	13.8355	0.0078	0.0365852	14.9861	0.0056	0.0262663	33.7556	0.0122	0.0572231		1.08316	2.43978	0.0722778	0.0139665	79.6	2981.7	3311.59	3060.97		0.28096	3.74001e-05	0.281078	0.281299	-4.19238	1.77048	2.54073	3.42441
25	199034	2655	3	121.17	-32.8836	10	13.8401	0.0386	0.122064	14.9288	0.0345	0.109099	33.5147	0.069	0.218197		1.07866	2.42156	0.0722538	0.0662204	18	2990.09	3223.8	2879.85
26	224332	2655	7	117.213	-32.918	31	13.9786	0.0146	0.0812894	15.0303	0.0163	0.0907546	33.9295	0.0405	0.225494		1.07524	2.42725	0.0715379	0.0918708	41.6	3145.05	3377.4	3194.89
27	224378	2660	4	116.51	-32.8703	22	13.5736	0.0106	0.0497184	14.7161	0.0086	0.0403376	33.3396	0.0228	0.106941		1.08417	2.45621	0.0736724	0.0225173	56.9	2697.7	2812.93	2757.76
28	178058	2660	4	119.873	-27.7842	36	13.8051	0.0139	0.0834	14.8841	0.0112	0.0672	33.6667	0.0261	0.1566		1.07816	2.43871	0.072437	0.0401394	48.7	2966.33	3158.3	3008.1		0.280831	1.25001e-05	0.281074	0.281295	-8.66527	0.198097	2.21377	3.71202
29	207526	2663	7	120.267	-31.587	33	13.8171	0.0132	0.0758282	14.9242	0.014	0.0804239	33.5905	0.0274	0.157401		1.08013	2.43108	0.0723741	0.0312454	44.4	2989.52	3231.63	2957.42
30	179669	2663	3	122.085	-32.0336	17	14.0935	0.0258	0.106376	15.0352	0.0132	0.054425	33.7318	0.0466	0.192137		1.06682	2.39343	0.0709547	0.0481449	31.5	3295.18	3397.3	3064.88
31	104964	2664	5	121.631	-31.8696	24	13.7141	0.0189	0.0925907	14.7914	0.0189	0.0925907	33.2648	0.0418	0.204777		1.07855	2.42559	0.0729177	0.0296022	54	2875.05	2992.09	2710.01		0.281221	6.80001e-05	0.281072	0.281292	5.31432	5.85309	3.25229	2.82594
32	211059	2664	3	121.266	-29.0482	39	13.6488	0.0149	0.0930505	14.7613	0.0156	0.097422	33.3605	0.0376	0.234812		1.08151	2.44421	0.0732665	0.0309022	47.5	2799.33	2928.35	2783.75
33	183149	2664	5	123.645	-28.1943	35	13.6867	0.02	0.118322	14.8256	0.0173	0.102348	33.5533	0.0323	0.191089		1.08321	2.45153	0.0730636	0.0723754	27.2	2843.39	3059.97	2931.49
34	199024	2669	19	119.212	-31.3067	23	13.7337	0.0131	0.0628254	14.8475	0.0078	0.0374075	33.4302	0.0199	0.095437		1.0811	2.43417	0.0728136	0.0360312	51.1	2913.76	3112.03	2849.62
35	224329	2669	7	117.509	-33.5126	34	13.8505	0.0134	0.0781348	14.8833	0.0102	0.0594757	33.5846	0.0217	0.126532		1.07457	2.42479	0.0721996	0.0396632	34.1	3046.22	3175.31	2967.64
36	193316	2669	3	123.042	-27.3086	4	13.7312	0.0231	0.0462	14.8522	0.0317	0.0634	33.6235	0.0609	0.1218		1.08164	2.44869	0.0728268	0.0492362	35.5	2910.89	3120.56	2997.26
37	178190	2670	9	118.141	-27.0652	39	13.7408	0.0161	0.100544	14.8516	0.0097	0.0605765	33.5653	0.0272	0.169864		1.08084	2.44275	0.072776	0.0297975	53.7	2925.11	3121.63	2955.38		0.281102	1.70007e-05	0.281068	0.281287	1.20518	0.37092	2.26044	3.09357
38	219902	2670	5	117.91	-33.5412	35	13.8407	0.009	0.0532447	14.9172	0.01	0.0591608	33.6605	0.0246	0.145536		1.07778	2.43199	0.0722507	0.0509855	26.7	3038.38	3233.73	3027.85
39	204585	2671	7	121.54	-31.3286	22	13.7905	0.0212	0.0994368	14.8445	0.02	0.0938083	33.6048	0.0474	0.222326		1.07643	2.43681	0.0725137	0.0438867	47.4	2984.9	3110.89	2987.93
40	185985	2671	5	119.856	-28.2049	25	13.7721	0.0129	0.0645	14.9028	0.0105	0.0525	33.6986	0.0449	0.2245		1.0821	2.44687	0.0726106	0.0495107	33.4	2964.02	3212.13	3059.22		0.280903	1.8e-05	0.281067	0.281287	-5.81957	0.410135	2.2687	3.54088
41	178054	2674	9	119.136	-28.1051	11	13.7389	0.035	0.116082	14.8412	0.036	0.119398	33.5137	0.0771	0.255712		1.08023	2.43933	0.072786	0.0255712	55.9	2935.82	3111.4	2925.83		0.280964	2.30004e-05	0.281065	0.281284	-3.59768	0.669663	2.32753	3.4024
42	178199	2675	3	117.941	-27.0238	20	13.8336	0.0286	0.127903	14.8898	0.0187	0.0836289	33.4511	0.039	0.174413		1.07635	2.41811	0.0722878	0.0254523	83.7	3046.23	3198.43	2880.42		0.281063	1.40001e-05	0.281064	0.281284	-0.0351305	0.248113	2.23619	3.17662
43	214243	2676	6	118.029	-27.4415	38	13.5969	0.0099	0.0610277	14.737	0.0117	0.0721236	33.2687	0.0292	0.180001		1.08385	2.44679	0.0735462	0.0261059	55.9	2778.19	2906.19	2742.81
44	224395	2676	4	116.587	-31.8913	15	13.7359	0.0096	0.0371806	14.8397	0.0091	0.0352441	33.5359	0.018	0.0697137		1.08036	2.44148	0.0728019	0.0550027	50	2938.83	3113.02	2947.68
45	98260	2676	8	121.072	-30.6901	25	13.8043	0.0144	0.072	14.8986	0.0131	0.0655	33.5871	0.0273	0.1365		1.07927	2.43309	0.0724412	0.0261549	45.1	3016.43	3215.04	2986.71
46	168901	2676	5	120.029	-29.4142	31	13.888	0.0148	0.0824029	15.0885	0.0159	0.0885275	33.838	0.0422	0.23496		1.08644	2.43649	0.0720046	0.0476347	38.1	3110.14	3487.82	3176.85		0.280828	2.05003e-05	0.281064	0.281283	-8.38545	0.557634	2.30303	3.70698
47	207524	2677	6	120.356	-31.8542	31	13.8839	0.0191	0.106344	14.9303	0.014	0.0779487	33.5836	0.0307	0.17093		1.07537	2.41889	0.0720259	0.026271	75.4	3108.72	3267.85	2986.49
48	198220	2678	8	118.622	-28.4428	27	13.829	0.013	0.06755	14.903	0.0085	0.0441673	33.5857	0.0243	0.126267		1.07766	2.42864	0.0723118	0.0487644	50	3050.56	3226.18	2990.54
49	185997	2679	8	118.139	-29.054	11	13.8113	0.0253	0.0839106	14.9209	0.0172	0.0570459	33.6424	0.0388	0.128685		1.08034	2.43586	0.0724045	0.0333922	71	3033.84	3256.84	3036.11		0.281068	1.01513e-05	0.281062	0.281281	0.236141	0.134784	2.21359	3.16241
50	207530	2680	6	120.481	-31.9555	32	13.8531	0.0147	0.0831558	14.9633	0.0155	0.0876812	33.7238	0.0328	0.185545		1.08014	2.43439	0.072186	0.0398608	46.4	3083.84	3323.55	3100.28
51	199023	2681	3	119.319	-31.4809	37	13.7534	0.0094	0.057178	14.858	0.0088	0.0535283	33.3939	0.0208	0.126521		1.08031	2.42805	0.0727093	0.0314292	61.9	2974.8	3156.35	2851.41
52	198212	2681	5	118.134	-29.1913	30	13.772	0.0166	0.0909219	14.8823	0.0165	0.0903742	33.5617	0.0401	0.219637		1.08062	2.43695	0.0726111	0.0420984	45.4	2995.88	3197.92	2979.62		0.280993	1.55e-05	0.28106	0.281279	-2.39092	0.304451	2.25239	3.33128
53	168963	2683	4	119.637	-29.3081	30	13.656	0.0131	0.0717517	14.8198	0.0128	0.0701085	33.3764	0.0291	0.159387		1.08522	2.44408	0.0732279	0.0211843	68.8	2869.8	3091.85	2842.93		0.281008	1.60001e-05	0.281059	0.281277	-1.82661	0.324079	2.25818	3.29697
54	155514	2684	3	117.554	-27.5928	33	13.8066	0.0139	0.0798494	14.8786	0.0125	0.071807	33.5905	0.0429	0.246442		1.07764	2.43293	0.0724291	0.0162075	37.9	3044.42	3197.77	3008.9
55	155502	2686	4	117.51	-27.8916	24	13.672	0.025	0.122474	14.8237	0.0231	0.113166	33.4573	0.0551	0.269934		1.08424	2.44714	0.0731422	0.0225829	47.9	2897.97	3105.75	2912.26
56	185986	2686	5	119.856	-28.2055	31	13.9287	0.0252	0.140308	15.0984	0.0244	0.135853	33.9286	0.0544	0.302886		1.08398	2.43588	0.0717942	0.0565857	38	3186.29	3515.07	3269.27		0.280889	1.95003e-05	0.281057	0.281275	-5.96526	0.481704	2.29447	3.5619
57	178052	2688	11	119.017	-28.5207	16	13.7091	0.0294	0.1176	14.9243	0.0341	0.1364	33.6873	0.0612	0.2448		1.08864	2.45729	0.0729442	0.00895764	60.8	2946.89	3279.12	3092.15		0.280874	3.40005e-05	0.281056	0.281274	-6.47046	1.46348	2.50003	3.59545
58	168903	2693	4	119.823	-29.8045	18	13.709	0.0254	0.107763	14.8809	0.0256	0.108612	33.5742	0.0645	0.27365		1.08548	2.44906	0.0729448	0.0397508	39.5	2962.86	3219.66	3018.55		0.280866	1.70002e-05	0.281052	0.28127	-6.63019	0.365874	2.2732	3.60948
59	155513	2693	9	118.038	-27.517	12	13.8232	0.0186	0.0644323	14.9306	0.0187	0.0647787	33.6278	0.0402	0.139257		1.08011	2.43271	0.0723421	0.033914	59.1	3091.43	3298.08	3059.25
60	168966	2694	6	119.173	-29.3833	22	13.6895	0.0198	0.0928702	14.8439	0.0169	0.079268	33.4406	0.0291	0.136491		1.08433	2.44279	0.0730487	0.037718	36.1	2943.87	3159.19	2919.19		0.280888	3.20005e-05	0.281052	0.281269	-5.82441	1.31666	2.47363	3.55927
61	185992	2698	4	119.365	-30.0559	21	13.5938	0.0135	0.0618648	14.8057	0.0143	0.0655308	33.3178	0.0343	0.157182		1.08915	2.45096	0.0735629	0.0490353	40	2846.9	3099.46	2835.05		0.280936	1.10001e-05	0.281049	0.281266	-4.04117	0.15319	2.22993	3.44944
62	199700	2700	4	117.683	-27.9772	27	13.6334	0.0211	0.109639	14.7981	0.0182	0.09457	33.5101	0.033	0.171473		1.08543	2.45794	0.0733493	0.0413757	38.9	2899.09	3089.9	2986.94
63	207505	2700	6	120.363	-32.3515	38	13.7725	0.0249	0.153494	14.9354	0.0249	0.153494	33.5367	0.0547	0.337193		1.08444	2.43505	0.0726085	0.0442033	25.7	3056.89	3318.14	3007.19
64	169068	2701	8	119.001	-28.5705	14	13.715	0.0328	0.122726	14.8511	0.0291	0.108882	33.5638	0.0754	0.282121		1.08284	2.44723	0.0729129	0.0203832	46.3	2995.33	3186.25	3030.24		0.280938	2.95003e-05	0.281047	0.281264	-3.89484	1.10463	2.43569	3.44251
65	207525	2701	5	120.425	-31.5168	25	13.919	0.0152	0.076	14.9992	0.0159	0.0795	33.7654	0.0356	0.178		1.07761	2.42585	0.0718442	0.0272697	47.1	3222.11	3410.61	3182.83
66	205942	2702	11	117.242	-33.7363	19	13.7651	0.0091	0.039666	14.8085	0.0094	0.0409737	33.4323	0.0237	0.103306		1.0758	2.42877	0.0726475	0.025991	49.5	3054.94	3113.57	2932.54
67	155503	2702	4	117.51	-27.8916	35	13.7161	0.0144	0.0851915	14.8637	0.0166	0.0982069	33.5505	0.0396	0.234277		1.08367	2.44607	0.072907	0.0111399	49.1	2999.78	3209.43	3022.58
68	192226	2706	5	123.61	-28.7058	35	13.6501	0.0124	0.0733594	14.7934	0.0105	0.0621188	33.2576	0.0272	0.160917		1.08376	2.43644	0.0732595	0.063799	23.6	2937.66	3094.86	2808.63
69	155504	2706	4	117.728	-28.0515	35	13.6233	0.0201	0.118913	14.7747	0.0177	0.104715	33.2834	0.0361	0.21357		1.08452	2.44312	0.0734037	0.0445412	35.9	2906.99	3059.57	2828.44
70	168956	2711	4	119.014	-30.3147	31	13.7824	0.0188	0.104674	14.9114	0.013	0.0723809	33.5624	0.0403	0.224381		1.08192	2.43516	0.0725563	0.0346888	43.8	3102.74	3302.46	3053.66
71	182603	2714	4	123.045	-29.0244	8	13.7281	0.0312	0.0882469	14.9243	0.0229	0.064771	33.6309	0.0449	0.126996		1.08714	2.44979	0.0728433	0.0269431	46.7	3051.58	3327.28	3112.9
72	155505	2716	12	117.728	-28.0515	20	13.6712	0.0181	0.0809457	14.8136	0.0141	0.0630571	33.4556	0.0354	0.158314		1.08356	2.44716	0.0731465	0.0538056	35.1	2993.87	3153.57	2984.73
73	182308	2718	6	120.752	-32.373	29	13.8082	0.0211	0.113627	14.9332	0.0147	0.0791619	33.5223	0.0336	0.180942		1.08147	2.42771	0.0724207	0.0272665	51.9	3153.34	3347.55	3040.35		0.280961	1.10018e-05	0.281036	0.281251	-2.68241	0.15325	2.24424	3.3789
74	155511	2728	9	118.146	-27.5308	12	13.5714	0.022	0.0762102	14.7451	0.0186	0.0644323	33.3284	0.0471	0.163159		1.08648	2.45578	0.0736844	0.0284511	41.2	2919.05	3055.34	2917.24
75	142919	2729	4	119.264	-29.9267	30	13.6108	0.0104	0.0569631	14.8515	0.0067	0.0366974	33.5358	0.0198	0.108449		1.09116	2.46391	0.0734711	0.0664794	31.4	2967.23	3244.25	3077.53		0.280867	1.80002e-05	0.281029	0.281243	-5.75445	0.41152	2.30759	3.58238
76	182379	2732	16	123.839	-28.1586	34	13.7448	0.0223	0.13003	14.7303	0.0171	0.0997093	33.3674	0.0421	0.245483		1.0717	2.42764	0.0727548	0.0271189	20.9	3127.2	3036.35	2956.86
77	155507	2732	4	117.826	-27.8692	6	13.7712	0.026	0.0636867	14.8749	0.0343	0.0840175	33.5444	0.0669	0.163871		1.08015	2.43584	0.0726153	0.0074185	75.9	3156.4	3286.87	3091.38
78	142813	2738	6	120.929	-27.5386	30	13.9424	0.0255	0.139669	14.9888	0.0156	0.0854447	33.6676	0.0439	0.24045		1.07505	2.41476	0.0717237	0.0386501	34.5	3360.89	3458.14	3199.09
79	155874	2746	4	116.89	-28.9261	28	13.3515	0.0122	0.0645563	14.602	0.0108	0.0571482	33.0898	0.0271	0.1434		1.09366	2.47836	0.074898	0.0319982	61	2722.98	2792.1	2778.87
80	155822	2749	4	116.85	-28.6074	26	13.3726	0.0136	0.0693467	14.6597	0.0109	0.0555793	33.1459	0.0269	0.137164		1.09625	2.47864	0.0747798	0.0399048	59	2757.89	2935.34	2829.42		0.280924	1.20001e-05	0.281015	0.281228	-3.26409	0.182351	2.27179	3.44023
81	207503	2750	14	120.541	-32.036	22	13.8475	0.0209	0.0980297	14.8828	0.0169	0.079268	33.4657	0.0352	0.165103		1.07476	2.41673	0.0722152	0.0388866	40.2	3295.66	3333.18	3075.8
82	155875	2766	4	116.84	-28.9609	34	13.328	0.0105	0.061225	14.6328	0.0101	0.0588926	33.164	0.0297	0.173179		1.0979	2.4883	0.07503	0.0620609	50.1	2762.51	2924.73	2885.4
83	178122	2770	3	123.49	-28.0455	27	13.7862	0.0301	0.156404	14.8234	0.02	0.103923	33.4136	0.0567	0.294622		1.07523	2.4237	0.0725363	0.0198523	26.6	3291.15	3282.94	3085.31		0.281056	1.80003e-05	0.281002	0.281212	1.93327	0.411606	2.33662	3.12568
84	178194	2774	3	117.667	-27.2333	14	13.6607	0.0224	0.0838131	14.8278	0.0249	0.0931673	33.501	0.0563	0.210655		1.08543	2.45236	0.0732027	0.0110028	46.1	3166.7	3297.72	3161.2		0.28097	1.25e-05	0.280999	0.281209	-1.031	0.200734	2.29352	3.31789
85	199049	2780	5	120.863	-32.5955	27	13.629	0.0139	0.0722265	14.8068	0.0069	0.0358535	33.2833	0.0162	0.0841777		1.08642	2.44209	0.073373	0.0333377	43.1	3150.68	3277.67	3010.96
86	182454	2808	7	120.462	-28.1255	37	13.77	0.0091	0.0553531	14.8506	0.006	0.0364966	33.5107	0.0165	0.100366		1.07847	2.4336	0.0726216	0.0485397	34.8	3390.7	3396.58	3251.41
87	155522	2816	6	117.718	-28.4622	16	13.4472	0.0123	0.0492	14.695	0.0176	0.0704	33.3097	0.0429	0.1716		1.09279	2.47707	0.0743649	0.0548178	32.6	3063.54	3174.64	3119.42
88	199046	2923	3	120.449	-32.1642	22	13.7867	0.042	0.196997	14.8938	0.0419	0.196528	33.6653	0.088	0.412757		1.0803	2.44187	0.0725337	0.111905	15.4	3753.39	3650.22	3644.59
89	155843	2925	5	116.712	-28.535	24	13.3346	0.0099	0.0484999	14.6089	0.007	0.0342929	33.1025	0.0212	0.103858		1.09556	2.48245	0.0749929	0.0420543	38	3288.11	3290.99	3230.38
90	198213	2945	6	118.347	-29.0585	26	13.5441	0.0206	0.10504	14.7325	0.0139	0.0708764	33.2845	0.0372	0.189684		1.08774	2.45749	0.0738329	0.0851966	21.3	3571.76	3503.37	3415.51		0.280882	1.55007e-05	0.280886	0.28108	-0.124607	0.304858	2.43365	3.39447
91	219311	2946	4	116.424	-29.0939	36	13.1918	0.0135	0.081	14.577	0.0122	0.0732	32.925	0.0314	0.1884		1.105	2.49587	0.0758047	0.0465165	29.3	3199.75	3291.81	3148.2
92	155879	2956	58	116.7	-28.7582	31	13.4692	0.0166	0.0924249	14.7046	0.0131	0.0729377	33.1934	0.0335	0.18652		1.09172	2.46439	0.0742435	0.0333263	42.2	3527.59	3490.06	3374.31		0.280889	2.04566e-05	0.280879	0.281071	0.386607	0.548287	2.4902	3.37049
93	142920	3023	10	119.328	-29.8463	12	13.6738	0.0348	0.120551	14.821	0.0239	0.082792	33.4619	0.0518	0.17944		1.0839	2.44715	0.0731326	0.0536282	25.4	3934.24	3740.09	3735.26
94	ARC-1A (15µm)	2695	10	119.188	-30.3282	7	13.5443	0.0762	0.201606	14.7701	0.1031	0.272777	33.1975	0.2507	0.66329		1.09	2.45103	0.0738318	0.02	74.5	2779.41	3024.24	2735.09		0.281002	2.70044e-05	0.281051	0.281268	-1.75227	0.923205	2.39534	3.30168
95	ARC-19 (15µm)	2665	17	119.521	-30.8864	25	13.7397	0.044	0.22	14.749	0.0457	0.2285	33.2993	0.1109	0.5545		1.07	2.42358	0.0727818	0.02	52.6	2907.72	2903.76	2739.1
96	ARC-20 (15µm)	2626	11	119.687	-31.1706	27	13.8332	0.0552	0.286828	14.9095	0.062	0.322161	33.4836	0.1354	0.703559		1.08	2.42052	0.0722899	0.03	53.2	2889.42	3133.65	2784.48		0.280993	1.7003e-05	0.281097	0.28132	-3.69459	0.365882	2.22854	3.3708
97	ARC-21 (15µm)	2661	9	119.812	-31.284	25	13.8314	0.0426	0.213	15.006	0.0499	0.2495	33.8837	0.1326	0.663		1.08	2.44977	0.0722993	0.03	48.9	2999.34	3352.88	3174.91		0.281021	3.20001e-05	0.281074	0.281294	-1.86784	1.30757	2.45224	3.28222
98	ARC-22 (15µm)	2746	8	119.642	-31.2947	22	13.7879	0.0442	0.207316	14.7848	0.0445	0.208724	33.1861	0.1007	0.472325		1.07	2.4069	0.0725274	0.04	48.2	3218.52	3169.35	2852.82
99	ARC-23 (15µm)	2773	8	120.532	-32.2892	36	14.0764	0.0488	0.2928	15.1678	0.0476	0.2856	34.1281	0.117	0.702		1.08	2.42449	0.0710409	0.03	37.1	3606.22	3713.93	3626.73		0.280957	2.20002e-05	0.280999	0.281209	-1.4904	0.612979	2.38179	3.34714
100	ARC-24 (15µm)	2696	14	120.599	-32.2839	33	13.903	0.0466	0.267697	14.9757	0.0504	0.289526	33.6546	0.1236	0.710028		1.08	2.42067	0.0719269	0.03	31.1	3189.1	3369.54	3086.9		0.281099	3.05009e-05	0.28105	0.281268	1.72307	1.20339	2.45305	3.08095
101	ARC-30 (15µm)	2653	13	121.333	-32.735	37	14.0418	0.0344	0.209247	15.0344	0.039	0.237228	33.7712	0.1072	0.652072		1.07	2.40505	0.0712159	0.02	44.9	3208.39	3379.87	3070.36		0.28103	1.50001e-05	0.281079	0.2813	-1.74947	0.284796	2.22951	3.26847
102	ARC-31 (15µm)	2656	9	121.422	-32.6541	27	14.0571	0.0477	0.247856	15.0928	0.051	0.265004	34.0821	0.1295	0.672902		1.07	2.42455	0.0711384	0.03	41.3	3234.32	3463.1	3311.98		0.281046	1.90003e-05	0.281077	0.281298	-1.08785	0.458216	2.26991	3.22873
103	ARC-32	2691	9	121.688	-32.457	38	14.2579	0.0259	0.159658	15.2614	0.0283	0.174453	34.082	0.0685	0.422262		1.07038	2.39039	0.0701366	0.0259256	58.6	3552.79	3703.72	3396.14		0.281025	2.45007e-05	0.281054	0.281271	-1.01476	0.87418	2.37899	3.25127
104	ARC-33	2658	5	120.686	-32.0726	29	13.9391	0.0273	0.147015	14.9782	0.0292	0.157247	33.7396	0.0693	0.373192		1.07455	2.4205	0.0717406	0.0369621	39.9	3110.61	3306.77	3058.59		0.280917	4.4e-05	0.281076	0.281296	-5.64833	2.45053	2.67325	3.51981
105	ARC-34	2652	7	120.931	-32.1306	37	13.9464	0.0267	0.16241	15.0166	0.0265	0.161193	33.7789	0.0649	0.394771		1.07674	2.42205	0.0717031	0.0218336	67.3	3099.98	3352.94	3073.77		0.281049	1.00002e-05	0.281079	0.281301	-1.09346	0.126578	2.19296	3.22594
106	ARC-35	2673	8	121.591	-32.173	37	13.9457	0.0195	0.118614	15.0122	0.0222	0.135037	33.8095	0.0639	0.388689		1.07648	2.42437	0.0717067	0.0288297	48	3164.65	3381.85	3148.05		0.281054	1.50002e-05	0.281066	0.281285	-0.416633	0.284826	2.24276	3.19936
107	ARC-36	2653	15	119.42	-31.7829	35	13.9264	0.0317	0.18754	14.9809	0.0329	0.194639	33.6795	0.0807	0.477428		1.07572	2.41839	0.0718061	0.0247205	49.4	3080.81	3302	3000.71		0.281013	1.20016e-05	0.281079	0.2813	-2.35452	0.182315	2.20563	3.30694
108	ARC-37	2755	12	119.488	-31.652	35	13.6346	0.0282	0.166833	14.8305	0.0293	0.173341	33.4327	0.0639	0.378037		1.08771	2.45205	0.0733428	0.0320194	39.4	3077.49	3263.59	3063.03		0.28099	1.55013e-05	0.281012	0.281223	-0.776989	0.319809	2.30629	3.28678
109	ARC-38	2773	36	119.591	-31.7187	36	13.5285	0.0248	0.1488	14.7176	0.0233	0.1398	33.4262	0.0587	0.3522		1.0879	2.4708	0.073918	0.0370159	32.2	3016.14	3112.4	3102.2		0.281031	2.80024e-05	0.281	0.28121	1.10691	0.993065	2.46001	3.18081
110	ARC-40	2666	3	118.51	-31.4304	29	13.9669	0.0326	0.175556	14.9536	0.0299	0.161016	33.6229	0.0724	0.389886		1.07	2.40733	0.0715978	0.04	50.2	3166.28	3283.69	2989.46		0.281053	1.60001e-05	0.28107	0.28129	-0.62651	0.325318	2.24692	3.2072
111	ARC-45	2640	7	118.671	-31.1939	29	13.8265	0.0176	0.0947789	14.862	0.0193	0.103934	33.5862	0.0437	0.235332		1.07	2.42912	0.0723249	0.04	44.3	2926.7	3075.89	2897.66		0.28093	2.80001e-05	0.281087	0.28131	-5.59211	0.99735	2.37436	3.50208
112	ARC-58	2696	5	120.003	-31.2647	38	13.7263	0.0193	0.118973	14.7904	0.0218	0.134384	33.5125	0.0504	0.310686		1.08	2.44148	0.0728528	0.05	36.3	2992.11	3066.15	2978.95		0.280952	4.10002e-05	0.28105	0.281268	-3.5168	2.12816	2.63459	3.41459
113	ARC-67	2684	6	121.405	-31.1219	32	13.8827	0.0175	0.0989949	14.9322	0.0244	0.138027	33.6668	0.0589	0.333189		1.08	2.42509	0.0720321	0.03	61.8	3129.31	3283.86	3066.85		0.281115	1.90006e-05	0.281058	0.281277	1.99903	0.457026	2.28914	3.05389
114	ARC-68	2687	14	121.085	-31.0373	29	13.6773	0.0183	0.0985485	14.7112	0.0193	0.103934	33.2137	0.0444	0.239101		1.08	2.42838	0.0731138	0.05	31.5	2907.29	2877.71	2727.71		0.281143	2.30037e-05	0.281056	0.281274	3.07608	0.681292	2.339	2.98738
115	ARC-69	2621	4	120.959	-31.1482	34	14.1156	0.0181	0.10554	15.149	0.0157	0.0915459	33.9723	0.0467	0.272305		1.07	2.40672	0.0708436	0.03	49.9	3190.99	3483.35	3144.75		0.281049	2.10002e-05	0.2811	0.281324	-1.82404	0.559384	2.26867	3.24803
116	ARC-70	2646	9	120.927	-31.2924	37	13.8923	0.0132	0.0802925	14.9736	0.0167	0.101582	33.6966	0.04	0.243311		1.08	2.42556	0.0719823	0.04	44.1	3020.51	3278.35	2996.6		0.281043	1.90002e-05	0.281083	0.281305	-1.28806	0.456924	2.27366	3.24325
117	ARC-71	2635	5	120.758	-31.6405	33	14.0498	0.0208	0.119487	15.0887	0.0216	0.124083	33.8982	0.0603	0.346397		1.07	2.41272	0.0711754	0.04	56.6	3161.7	3425.66	3122.73		0.281006	1.55001e-05	0.281091	0.281314	-3.03064	0.304387	2.22108	3.33573
118	ARC-74	2675	16	119.071	-31.7609	35	13.9947	0.0097	0.057386	15.0053	0.0082	0.0485119	33.7308	0.0311	0.18399		1.07	2.41026	0.0714556	0.04	63.3	3224.58	3375.52	3093.39		0.280949	1.60047e-05	0.281064	0.281284	-4.09726	0.324251	2.25234	3.4349
119	ARC-75	2607	10	118.739	-31.8263	25	13.9509	0.013	0.065	14.9344	0.0139	0.0695	33.5973	0.0432	0.216		1.07	2.40825	0.07168	0.04	51.4	2963.33	3139.82	2824.98		0.28095	3.00001e-05	0.281109	0.281335	-5.66768	1.13893	2.38352	3.48089
120	ARC-76	2671	7	119.437	-32.0354	38	13.8503	0.0061	0.0376029	14.9281	0.0073	0.0450002	33.624	0.0226	0.139316		1.08	2.42767	0.0722006	0.04	54.8	3052.32	3253.1	3002.54		0.280995	1.95002e-05	0.281067	0.281287	-2.54657	0.481664	2.28469	3.3333
121	ARC-77	2685	5	119.64	-31.9431	35	13.6953	0.0195	0.115364	14.8354	0.0136	0.0804587	33.4834	0.0393	0.232502		1.08	2.44488	0.0730178	0.04	54.7	2921.45	3124.82	2929.73		0.281027	1.80001e-05	0.281058	0.281276	-1.10678	0.415227	2.27985	3.25275
122	ARC-78	2648	15	119.668	-32.3678	34	13.6448	0.0073	0.0425659	14.8491	0.0062	0.0361519	33.5364	0.0235	0.137027		1.09	2.45782	0.073288	0.05	42.3	2741.96	3069.01	2879.23		0.280977	3.95015e-05	0.281082	0.281304	-3.74969	2.36256	2.6304	3.39161
123	ARC-79	2663	14	119.784	-32.7914	32	13.8771	0.0119	0.0673166	14.8917	0.0048	0.0271529	33.4262	0.02	0.113137		1.07	2.40873	0.0720612	0.03	64.6	3057.11	3177.52	2831.75		0.281184	3.8e-05	0.281072	0.281293	3.9776	1.82781	2.55888	2.91083
124	ARC-80	2663	9	119.991	-32.9119	37	13.6375	0.0066	0.0401462	14.7923	0.0088	0.0535283	33.479	0.0218	0.132604		1.08	2.45492	0.0733272	0.04	47.9	2782.85	2991.51	2872.22		0.280897	4.90003e-05	0.281072	0.281293	-6.22486	3.03922	2.7838	3.56024
125	ARC-81	2663	10	119.546	-32.8388	38	13.7721	0.0092	0.0567126	14.8344	0.0095	0.0585619	33.4977	0.0316	0.194795		1.08	2.43229	0.0726106	0.04	40.2	2938.36	3074.49	2886.53		0.280986	3.7e-05	0.281072	0.281293	-3.0746	1.75313	2.54205	3.36053
126	ARC-82	2664	7	119.416	-32.676	37	13.7291	0.0137	0.0833338	14.8435	0.0197	0.11983	33.4619	0.0409	0.248785		1.08	2.4373	0.072838	0.05	38.9	2892.32	3093.76	2861.59		0.280978	2.10001e-05	0.281072	0.281292	-3.33154	0.558227	2.297	3.37765
127	ARC-83	2639	4	119.035	-32.8199	37	13.9849	0.0087	0.05292	15.0097	0.0102	0.0620442	33.7421	0.0356	0.216546		1.07	2.41275	0.0715057	0.04	51.4	3102.23	3320.8	3014.1		0.281027	1.4e-05	0.281088	0.281311	-2.16146	0.248069	2.21136	3.28365
128	ARC-85	2642	11	119.261	-33.5302	26	14.1403	0.0248	0.126456	15.0126	0.0202	0.103	33.8579	0.0384	0.195802		1.06	2.39443	0.0707199	0.03	50.7	3282	3330.2	3109.26		0.28115	3.00005e-05	0.281086	0.281308	2.28485	1.14041	2.40736	3.0026
129	ARC-87	2686	8	119.882	-33.1657	36	13.7697	0.0151	0.0906	14.8292	0.0193	0.1158	33.4398	0.0454	0.2724		1.08	2.42851	0.0726232	0.04	49.3	3009.23	3115.79	2898.88		0.281035	4.30001e-05	0.281075	0.281296	-1.41047	2.34042	2.65308	3.25162
130	ARC-86	2659	7	119.753	-33.2556	38	13.842	0.0215	0.132535	14.9139	0.0234	0.144247	33.6528	0.0597	0.368016		1.08	2.43121	0.0722439	0.05	60.9	3004.96	3206.99	2995.08		0.28107	2.60002e-05	0.281057	0.281275	0.459384	0.855784	2.37546	3.15375
131	ARC-88	2631	6	119.495	-33.3349	38	13.9245	0.0181	0.111576	14.9921	0.0188	0.115891	33.7527	0.0529	0.326098		1.08	2.42398	0.0718159	0.05	52.1	3009.41	3280.21	3002.61		0.281008	1.75001e-05	0.281093	0.281317	-3.01933	0.390445	2.23759	3.33183
132	ARC-89	2650	9	120.097	-33.0669	31	13.8511	0.0247	0.137524	14.9301	0.0234	0.130286	33.6444	0.0525	0.292308		1.08	2.42901	0.0721964	0.05	49.5	2986.64	3216.35	2966.64		0.280936	3.55002e-05	0.281081	0.281302	-5.15713	1.59545	2.50346	3.48239
133	ARC-90	2646	5	120.287	-33.0672	26	13.9064	0.0218	0.111159	14.9424	0.0238	0.121357	33.6899	0.0564	0.287585		1.07	2.42262	0.0719093	0.05	51.5	3036.38	3228.85	2991.5		0.281072	4.3e-05	0.281083	0.281305	-0.402848	2.34027	2.64664	3.17725
134	ARC-96	2673	7	120.057	-33.4582	35	13.6838	0.031	0.183398	14.7778	0.0271	0.160326	33.3577	0.0718	0.424775		1.08	2.43775	0.0730791	0.04	51.3	2869.34	2986.09	2803.86		0.281038	2.00008e-05	0.281066	0.281285	-0.993	0.526644	2.29575	3.23606
135	ARC-99	2654	3	119.524	-32.3211	37	13.9248	0.0151	0.0918497	15.0238	0.0177	0.107665	33.923	0.0468	0.284673		1.08	2.43616	0.0718143	0.04	54.7	3082.16	3366.57	3187.57		0.280991	3e-05	0.281078	0.281299	-3.08878	1.13917	2.41322	3.35437
136	ARC-100	2708	4	119.955	-32.0287	36	13.5751	0.0241	0.1446	14.7337	0.0277	0.1662	33.2442	0.0665	0.399		1.09	2.44891	0.0736643	0.06	31	2858.02	2982.73	2803.29		0.280962	2.00002e-05	0.281043	0.281259	-2.85027	0.506435	2.31474	3.3817
137	ARC-101	2639	6	120.287	-31.8236	23	13.4647	0.0223	0.106947	14.872	0.0168	0.08057	33.6416	0.0452	0.216772		1.1	2.4985	0.0742683	0.04	60.5	2495.66	3092.47	2937.53		0.281019	1.80005e-05	0.281088	0.281311	-2.44342	0.410095	2.24754	3.30157
138	ARC-104	2660	3	120.636	-31.5323	38	13.9379	0.032	0.197261	14.9436	0.0232	0.143014	33.6544	0.0536	0.330413		1.07	2.4146	0.0717468	0.03	60.1	3115.53	3257.02	2998.74		0.281022	2e-05	0.281074	0.281295	-1.84849	0.506314	2.28273	3.28027
139	ARC-118	2699	8	120.357	-32.3467	36	13.6677	0.0151	0.0906	14.8234	0.0145	0.087	33.3888	0.0393	0.2358		1.08	2.4429	0.0731652	0.05	43.6	2935.13	3133.81	2891.91		0.281055	2.00004e-05	0.281049	0.281265	0.244498	0.506424	2.30937	3.17767
140	ARC-119	2639	5	120.272	-28.8375	34	13.8433	0.0132	0.0769686	14.9707	0.0149	0.0868812	33.8448	0.0393	0.229156		1.08	2.44485	0.0722371	0.03	81.4	2942.69	3261.17	3092.04		0.281007	3.30002e-05	0.281088	0.281311	-2.88877	1.39856	2.45623	3.32984
141	224345	2648	5	119.008	-34.1201	34	13.9273	0.0151	0.0880474	14.9569	0.0155	0.0903798	33.6941	0.0368	0.214579		1.07	2.41928	0.0718014	0.04	43.9	3066.12	3255.84	2999.59
142	224357	2978	5	119.896	-33.5366	28	13.3778	0.012	0.063498	14.7277	0.0161	0.0851932	33.3015	0.0324	0.171445		1.1	2.48931	0.0747507	0.03	66.7	3499.92	3560.64	3508.28
143	242405	2928	5	117.14	-29.7611	29	13.5343	0.0187	0.100703	14.7754	0.0186	0.100164	33.4192	0.0464	0.249872		1.09	2.46922	0.0738863	0.06	45.3	3509.68	3523.77	3474.51
144	227403	2646	6	116.371	-26.5432	15	13.9006	0.0223	0.0863675	14.9962	0.0223	0.0863675	33.6094	0.0437	0.169249		1.08	2.42	0.0719	0.2		3029.86	3312.75	2930.13
Zametzer et al., 2022
145	92969052	2650	-	120.937	-28.9383	36	13.7276	0.0296083	0.17765	14.8707	0.0188756	0.113254	33.5513	0.0691522	0.414913		1.08327	2.44408	0.0728459	0.023186	64.3695	2845.18	3113.58	2895.55
146	92969054	2640	-	120.344	-28.8486	36	13.7183	0.0303534	0.18212	14.8541	0.0167192	0.100315	33.4831	0.0434993	0.260996		1.08279	2.44076	0.0728951	0.0146149	97.4004	2801.81	3060.79	2818.67
147	92969068	2640	-	120.27	-28.5445	30	13.7248	0.0462931	0.253558	14.9031	0.0165123	0.0904415	33.6785	0.0708078	0.387831		1.08585	2.45384	0.0728607	0.0240634	62.3571	2809.37	3150.69	2968.13
148	92969082	2665	5	120.567	-28.1565	37	13.7382	0.0230085	0.139956	14.8862	0.0174719	0.106278	33.5629	0.0397144	0.241573		1.08356	2.44304	0.0727897	0.0223103	59.5695	2906.01	3172.16	2941.3
149	92969063	2684	8	119.739	-28.5107	28	13.6782	0.03844	0.203405	14.8489	0.031329	0.165778	33.5404	0.0789492	0.41776		1.08559	2.4521	0.0731089	0.0289284	52.9536	2898.63	3146.75	2970.73
150	92969019	2640	50	119.723	-27.1557	18	13.9494	0.0848312	0.359908	15.01	0.0403672	0.171263	33.8896	0.114174	0.4844		1.07603	2.42947	0.0716878	0.0245928	54.1236	3065.72	3322.97	3128.37
151	92969033	2671	3	119.128	-27.339	30	13.8216	0.034532	0.18914	14.9701	0.0386905	0.211917	33.747	0.0893267	0.489263		1.0831	2.44162	0.0723508	0.0273701	56.7724	3020	3317.68	3095.94
152	92969055	2712	6	119.395	-27.5856	27	13.6299	0.029231	0.151888	14.8417	0.0190079	0.0987678	33.3647	0.0495332	0.257382		1.08891	2.44791	0.0733682	0.0284487	45.2844	2933.99	3193.28	2905.53
153	92969114	2630	50	117.45	-27.1326	14	13.9194	0.100474	0.37594	14.8909	0.0396785	0.148463	33.8125	0.122122	0.45694		1.0698	2.42917	0.0718422	0.0243006	51.7665	3000.47	3108.36	3045.65
154	92969108	2650	-	121.301	-27.296	34	13.6584	0.0301241	0.175652	14.7743	0.0172531	0.100602	33.4352	0.0640556	0.373505		1.0817	2.44796	0.0732149	0.02457	58.7059	2764.56	2920.83	2806.59
155	92969113	2640	-	122.207	-28.0165	35	13.6135	0.0372428	0.220331	14.7001	0.0357276	0.211368	33.3118	0.086958	0.514451		1.07981	2.44696	0.0734563	0.0362434	40.2322	2678.45	2711.66	2686.71
156	92969113A	2671	12	122.207	-28.0165	39	13.4971	0.0249752	0.15597	14.7486	0.0179633	0.112181	33.2722	0.0448733	0.280234		1.09273	2.46514	0.0740902	0.100114	29.6773	2643.47	2918.78	2733.08
157	92969122	2939	6	121.953	-27.4147	26	13.6021	0.0677241	0.345326	14.8617	0.0184148	0.0938972	33.2035	0.05909	0.301301		1.0926	2.44106	0.0735181	0.0961855	34.3462	3613.39	3642.09	3340.43
158	92969071	2650	-	120.81	-28.0069	37	13.7223	0.068432	0.416255	14.8554	0.0138851	0.0844597	33.5017	0.0433708	0.263814		1.08258	2.44141	0.0728743	0.0161813	89.7564	2838.99	3085.38	2857.6
159	92969082A	2682	5	119.733	-28.7103	33	13.719	0.0144609	0.0830716	14.9324	0.00939809	0.0539879	33.6701	0.0315658	0.181332		1.08845	2.45428	0.0728919	0.0310906	41.2461	2938.8	3280.4	3064.5
160	92969045	2700	15	118.986	-27.1706	36	13.6918	0.0362009	0.217205	14.8263	0.012319	0.0739142	33.4884	0.0273958	0.164375		1.08286	2.44588	0.0730366	0.0286694	46.783	2965.78	3141.06	2970.39

## Sheet: PlotDat8
Source sheet	Dataset S3 - Individual	0.2	13.7652	1	13.8399	0.0931477	0.85	13.7468
Plot name	Average8	3995.8	13.7652	2	13.7063	0.113062	1.15	13.7468
Plot Type	15			3	13.696	0.0696338	1.15	13.933
1st free col	8			4	13.7735	0.0926627	0.85	13.933
Sigma Level	1			5	13.7799	0.0476925	0.85	13.7468
Absolute Errs	TRUE			6	13.7072	0.198448	ErrBox	ErrBox
Symbol Type	1			7	13.7608	0.201625	1.85	13.5932
Inverse Plot	FALSE			8	13.6619	0.0975531	2.15	13.5932
Color Plot	TRUE			9	13.7212	0.164048	2.15	13.8193
3D plot	FALSE			10	13.7419	0.143215	1.85	13.8193
Linear	FALSE			11	13.7217	0.146095	1.85	13.5932
Data Range	C3:D4140			12	13.7826	0.0952154	ErrBox	ErrBox
Filled Symbols	TRUE			13	13.7525	0.0883207	2.85	13.6264
ConcAge	FALSE			14	13.752	0.205373	3.15	13.6264
ConcSwap	FALSE			15	13.7429	0.121996	3.15	13.7657
1st Symbol-row	1			16	13.7272	0.152992	2.85	13.7657
				17	13.7183	0.22178	2.85	13.6264
				18	13.7967	0.108445	ErrBox	ErrBox
				19	13.7968	0.122118	3.85	13.6809
				20	13.7872	0.15776	4.15	13.6809
				21	13.721	0.101079	4.15	13.8662
				22	13.677	0.0968554	3.85	13.8662
				23	13.8093	0.257973	3.85	13.6809
				24	13.68	0.0314375	ErrBox	ErrBox
				25	13.9181	0.150233	4.85	13.7322
				26	14.0124	0.239394	5.15	13.7322
				27	13.8759	0.425613	5.15	13.8276
				28	13.8152	0.275323	4.85	13.8276
				29	13.9176	0.435637	4.85	13.7322
				30	13.9389	0.137702	ErrBox	ErrBox
				31	13.8981	0.413307	5.85	13.5087
				32	13.9289	0.249775	6.15	13.5087
				33	13.8081	0.0350224	6.15	13.9056
				34	13.9079	0.446557	5.85	13.9056
				35	13.9026	0.311677	5.85	13.5087
				36	13.9212	0.121241	ErrBox	ErrBox
				37	13.8402	0.14426	6.85	13.5592
				38	13.9944	0.187105	7.15	13.5592
				39	13.9525	0.184586	7.15	13.9624
				40	13.8906	0.121685	6.85	13.9624
				41	13.9718	0.264881	6.85	13.5592
				42	13.9144	0.199983	ErrBox	ErrBox
				43	13.8493	0.115111	7.85	13.5644
				44	13.7559	0.222097	8.15	13.5644
				45	13.7368	0.0649328	8.15	13.7595
				46	13.7447	0.0779786	7.85	13.7595
				47	13.7036	0.104477	7.85	13.5644
				48	13.7601	0.115362	ErrBox	ErrBox
				49	13.7397	0.0528524	8.85	13.5571
				50	13.7171	0.0650978	9.15	13.5571
				51	13.827	0.117368	9.15	13.8852
				52	13.7665	0.111378	8.85	13.8852
				53	13.7733	0.113209	8.85	13.5571
				54	13.7955	0.391625	ErrBox	ErrBox
				55	13.7909	0.0700452	9.85	13.5987
				56	13.7708	0.0697688	10.15	13.5987
				57	13.6765	0.0490335	10.15	13.8851
				58	13.8376	0.160119	9.85	13.8851
				59	13.8318	0.102471	9.85	13.5987
				60	13.812	0.115964	ErrBox	ErrBox
				61	13.7404	0.0832017	10.85	13.5756
				62	13.7445	0.0838283	11.15	13.5756
				63	13.7676	0.088563	11.15	13.8678
				64	13.8232	0.0816016	10.85	13.8678
				65	13.7659	0.0693139	10.85	13.5756
				66	13.7397	0.0953324	ErrBox	ErrBox
				67	13.513	0.17912	11.85	13.6874
				68	13.5413	0.419764	12.15	13.6874
				69	13.5383	0.502929	12.15	13.8778
				70	13.6519	0.171008	11.85	13.8778
				71	13.4642	0.408325	11.85	13.6874
				72	13.4939	0.372838	ErrBox	ErrBox
				73	13.5279	0.37732	12.85	13.6642
				74	13.5303	0.181937	13.15	13.6642
				75	13.6284	0.215958	13.15	13.8409
				76	13.5839	0.198383	12.85	13.8409
				77	13.5445	0.215737	12.85	13.6642
				78	13.5369	0.173668	ErrBox	ErrBox
				79	13.6108	0.356174	13.85	13.5466
				80	13.5941	0.144468	14.15	13.5466
				81	13.5172	0.116187	14.15	13.9574
				82	13.6425	0.137791	13.85	13.9574
				83	13.6829	0.201326	13.85	13.5466
				84	13.7228	0.171615	ErrBox	ErrBox
				85	13.6985	0.537386	14.85	13.6209
				86	13.5895	0.222505	15.15	13.6209
				87	13.7108	0.175787	15.15	13.8649
				88	13.6128	0.433589	14.85	13.8649
				89	13.6647	0.242706	14.85	13.6209
				90	13.646	0.178087	ErrBox	ErrBox
				91	13.6556	0.125603	15.85	13.5742
				92	13.5631	0.185913	16.15	13.5742
				93	13.834	0.475203	16.15	13.8802
				94	13.8079	0.413616	15.85	13.8802
				95	13.845	0.468353	15.85	13.5742
				96	13.7615	0.524699	ErrBox	ErrBox
				97	13.686	0.309854	16.85	13.4965
				98	13.6715	0.204174	17.15	13.4965
				99	13.6829	0.361748	17.15	13.9401
				100	13.6283	0.211829	16.85	13.9401
				101	13.6689	0.144997	16.85	13.4965
				102	13.6657	0.279193	ErrBox	ErrBox
				103	13.6606	0.423309	17.85	13.6882
				104	13.6459	0.120278	18.15	13.6882
				105	13.7101	0.154331	18.15	13.9051
				106	13.627	0.22903	17.85	13.9051
				107	13.6397	0.206147	17.85	13.6882
				108	13.633	0.134426	ErrBox	ErrBox
				109	13.634	0.174507	18.85	13.6747
				110	13.6042	0.248278	19.15	13.6747
				111	13.6087	0.1567	19.15	13.9189
				112	13.6712	0.191959	18.85	13.9189
				113	13.6333	0.105703	18.85	13.6747
				114	13.6147	0.147672	ErrBox	ErrBox
				115	13.5307	0.172777	19.85	13.6294
				116	13.5794	0.121341	20.15	13.6294
				117	13.5584	0.0545068	20.15	13.9449
				118	13.5871	0.134369	19.85	13.9449
				119	13.6332	0.108288	19.85	13.6294
				120	13.5676	0.101404	ErrBox	ErrBox
				121	13.5627	0.101269	20.85	13.6199
				122	13.532	0.050313	21.15	13.6199
				123	13.5481	0.0876217	21.15	13.8221
				124	13.4991	0.0603488	20.85	13.8221
				125	13.5918	0.124191	20.85	13.6199
				126	13.5878	0.131355	ErrBox	ErrBox
				127	13.5125	0.0702925	21.85	13.5802
				128	13.6072	0.137675	22.15	13.5802
				129	13.5547	0.105313	22.15	13.7739
				130	13.6017	0.378076	21.85	13.7739
				131	13.5191	0.0418658	21.85	13.5802
				132	13.5885	0.109078	ErrBox	ErrBox
				133	13.5101	0.0637762	22.85	13.5513
				134	13.5346	0.0883964	23.15	13.5513
				135	13.6365	0.107555	23.15	14.0672
				136	13.5231	0.0728706	22.85	14.0672
				137	13.5229	0.103917	22.85	13.5513
				138	13.5582	0.130858	ErrBox	ErrBox
				139	13.5451	0.122878	23.85	13.6486
				140	13.5595	0.0644294	24.15	13.6486
				141	13.595	0.139082	24.15	13.7115
				142	13.4817	0.0589214	23.85	13.7115
				143	13.5425	0.106802	23.85	13.6486
				144	13.5342	0.0713831	ErrBox	ErrBox
				145	13.5814	0.134796	24.85	13.7679
				146	13.7683	0.253683	25.15	13.7679
				147	13.863	0.18242	25.15	14.0683
				148	13.7956	0.216537	24.85	14.0683
				149	13.8196	0.18876	24.85	13.7679
				150	13.8823	0.385354	ErrBox	ErrBox
				151	13.8211	0.186711	25.85	13.773
				152	13.831	0.154827	26.15	13.773
				153	13.7555	0.18343	26.15	14.2517
				154	13.8395	0.111323	25.85	14.2517
				155	13.7593	0.210817	25.85	13.773
				156	13.9181	0.114902	ErrBox	ErrBox
				157	13.8739	0.180041	26.85	13.4503
				158	13.7913	0.363254	27.15	13.4503
				159	13.8934	0.24086	27.15	14.3015
				160	13.8504	0.0674904	26.85	14.3015
				161	13.8669	0.0926798	26.85	13.4503
				162	13.8301	0.247096	ErrBox	ErrBox
				163	13.7788	0.24402	27.85	13.5399
				164	13.7418	0.106762	28.15	13.5399
				165	13.7788	0.241071	28.15	14.0906
				166	13.8581	0.233597	27.85	14.0906
				167	13.8418	0.1604	27.85	13.5399
				168	13.8325	0.0869966	ErrBox	ErrBox
				169	13.8125	0.558	28.85	13.4819
				170	13.8842	0.122055	29.15	13.4819
				171	13.8369	0.241223	29.15	14.3532
				172	13.709	0.123537	28.85	14.3532
				173	13.7641	0.249034	28.85	13.4819
				174	13.7372	0.0957604	ErrBox	ErrBox
				175	13.7007	0.109	29.85	13.8012
				176	13.7158	0.12687	30.15	13.8012
				177	13.7982	0.117637	30.15	14.0766
				178	13.8011	0.171978	29.85	14.0766
				179	13.721	0.172911	29.85	13.8012
				180	13.8132	0.198499	ErrBox	ErrBox
				181	13.8186	0.0759262	30.85	13.4847
				182	13.7512	0.147593	31.15	13.4847
				183	13.8066	0.157866	31.15	14.3114
				184	13.7067	0.138537	30.85	14.3114
				185	13.7646	0.154802	30.85	13.4847
				186	13.7166	0.116546	ErrBox	ErrBox
				187	13.7877	0.137569	31.85	13.6792
				188	13.7625	0.137666	32.15	13.6792
				189	13.7589	0.16317	32.15	14.1787
				190	13.7768	0.192888	31.85	14.1787
				191	13.7404	0.151189	31.85	13.6792
				192	13.8094	0.086628	ErrBox	ErrBox
				193	13.7861	0.109582	32.85	13.7731
				194	13.7959	0.0610531	33.15	13.7731
				195	13.7726	0.130542	33.15	13.8431
				196	13.7763	0.191034	32.85	13.8431
				197	13.8181	0.253515	32.85	13.7731
				198	13.7411	0.131275	ErrBox	ErrBox
				199	13.7347	0.210682	33.85	13.4613
				200	13.76	0.124538	34.15	13.4613
				201	13.736	0.255471	34.15	14.3544
				202	13.7746	0.100473	33.85	14.3544
				203	13.7342	0.182082	33.85	13.4613
				204	13.7491	0.171077	ErrBox	ErrBox
				205	13.7755	0.117826	34.85	13.5909
				206	13.7788	0.228628	35.15	13.5909
				207	13.725	0.195183	35.15	14.2142
				208	13.6919	0.178016	34.85	14.2142
				209	13.918	0.637423	34.85	13.5909
				210	13.9506	0.4003	ErrBox	ErrBox
				211	13.9297	0.697562	35.85	13.8
				212	13.9453	0.872679	36.15	13.8
				213	13.8615	0.558485	36.15	14.0424
				214	13.8835	0.477372	35.85	14.0424
				215	13.9011	0.734249	35.85	13.8
				216	13.9658	0.625443	ErrBox	ErrBox
				217	13.918	0.64095	36.85	13.696
				218	13.9901	0.482664	37.15	13.696
				219	13.9844	0.509786	37.15	13.9845
				220	13.8508	0.526175	36.85	13.9845
				221	13.8294	0.106782	36.85	13.696
				222	13.8124	0.132087	ErrBox	ErrBox
				223	13.8258	0.197713	37.85	13.8073
				224	13.8334	0.187753	38.15	13.8073
				225	13.7747	0.186438	38.15	14.1815
				226	13.7473	0.361451	37.85	14.1815
				227	13.7424	0.149708	37.85	13.8073
				228	13.8124	0.349347	ErrBox	ErrBox
				229	13.7578	0.215359	38.85	13.7679
				230	13.7856	0.164618	39.15	13.7679
				231	13.696	0.106081	39.15	14.1371
				232	13.7182	0.21127	38.85	14.1371
				233	13.8565	0.136824	38.85	13.7679
				234	13.7783	0.155446	ErrBox	ErrBox
				235	13.7672	0.156596	39.85	13.769
				236	13.7649	0.143213	40.15	13.769
				237	13.7811	0.230722	40.15	14.0123
				238	13.7295	0.141165	39.85	14.0123
				239	13.7145	0.176565	39.85	13.769
				240	13.8141	0.327334	ErrBox	ErrBox
				241	13.8308	0.0956493	40.85	13.7069
				242	13.8076	0.117018	41.15	13.7069
				243	13.793	0.108237	41.15	14.2367
				244	13.8508	0.293365	40.85	14.2367
				245	13.8645	0.556697	40.85	13.7069
				246	13.6734	0.260677	ErrBox	ErrBox
				247	13.6997	0.247165	41.85	13.7144
				248	13.5419	0.571968	42.15	13.7144
				249	13.6226	0.0863057	42.15	14.1144
				250	13.6217	0.130477	41.85	14.1144
				251	13.6524	0.294581	41.85	13.7144
				252	13.6415	0.244172	ErrBox	ErrBox
				253	13.693	0.37685	42.85	13.7342
				254	13.6663	0.362507	43.15	13.7342
				255	13.7527	0.541576	43.15	13.9644
				256	13.6847	0.285532	42.85	13.9644
				257	13.5567	0.367987	42.85	13.7342
				258	13.5784	0.23261	ErrBox	ErrBox
				259	13.7338	0.386796	43.85	13.5339
				260	13.6385	0.322241	44.15	13.5339
				261	13.7399	0.27552	44.15	13.978
				262	13.6493	0.230435	43.85	13.978
				263	13.6165	0.252691	43.85	13.5339
				264	13.6824	0.17695	ErrBox	ErrBox
				265	13.5834	0.434019	44.85	13.6719
				266	13.9479	0.297759	45.15	13.6719
				267	14.0149	0.616468	45.15	13.8017
				268	13.9981	0.401871	44.85	13.8017
				269	13.9797	0.524018	44.85	13.6719
				270	13.9898	0.591832	ErrBox	ErrBox
				271	13.9607	0.471134	45.85	13.6667
				272	13.9865	0.502872	46.15	13.6667
				273	14.0192	0.632292	46.15	13.8227
				274	13.9997	0.498383	45.85	13.8227
				275	13.9834	0.525567	45.85	13.6667
				276	13.9624	0.385747	ErrBox	ErrBox
				277	13.9814	0.432789	46.85	13.5991
				278	13.9626	0.44839	47.15	13.5991
				279	13.9715	0.447287	47.15	13.8081
				280	13.9749	0.483939	46.85	13.8081
				281	13.9891	0.435322	46.85	13.5991
				282	13.9941	0.52148	ErrBox	ErrBox
				283	14.0101	0.507204	47.85	13.6448
				284	13.9969	0.539263	48.15	13.6448
				285	13.9835	0.500868	48.15	13.8755
				286	13.9981	0.409791	47.85	13.8755
				287	13.9674	0.360708	47.85	13.6448
				288	13.9907	0.536204	ErrBox	ErrBox
				289	13.9978	0.497677	48.85	13.6868
				290	14.0195	0.624141	49.15	13.6868
				291	13.9809	0.425458	49.15	13.7925
				292	13.9958	0.480651	48.85	13.7925
				293	13.948	0.332018	48.85	13.6868
				294	13.965	0.4439	ErrBox	ErrBox
				295	13.9959	0.49653	49.85	13.652
				296	13.9658	0.634454	50.15	13.652
				297	13.9866	0.498696	50.15	13.7822
				298	13.9894	0.523185	49.85	13.7822
				299	14.0126	0.39772	49.85	13.652
				300	13.8057	0.413938	ErrBox	ErrBox
				301	13.7887	0.440129	50.85	13.7096
				302	13.8382	0.480836	51.15	13.7096
				303	13.7482	0.362837	51.15	13.9443
				304	13.7672	0.375059	50.85	13.9443
				305	13.8692	0.551697	50.85	13.7096
				306	13.7616	0.580708	ErrBox	ErrBox
				307	13.7582	0.375951	51.85	13.6551
				308	13.7709	0.551957	52.15	13.6551
				309	13.777	1.04392	52.15	13.8779
				310	13.8059	0.688923	51.85	13.8779
				311	13.8276	0.386246	51.85	13.6551
				312	13.7898	0.551652	ErrBox	ErrBox
				313	13.8383	0.529436	52.85	13.6601
				314	13.8773	0.803466	53.15	13.6601
				315	13.7706	0.519732	53.15	13.8865
				316	13.7983	0.666172	52.85	13.8865
				317	13.7525	0.454261	52.85	13.6601
				318	13.7559	0.365772	ErrBox	ErrBox
				319	13.7808	0.417854	53.85	13.4039
				320	13.8255	0.779438	54.15	13.4039
				321	13.8329	0.601975	54.15	14.1871
				322	13.8636	0.786343	53.85	14.1871
				323	13.7583	0.41845	53.85	13.4039
				324	13.762	0.462749	ErrBox	ErrBox
				325	13.7881	0.588585	54.85	13.7208
				326	13.8201	0.592094	55.15	13.7208
				327	13.8042	0.51911	55.15	13.8609
				328	13.8129	0.533608	54.85	13.8609
				329	13.7901	0.487959	54.85	13.7208
				330	13.7703	0.498948	ErrBox	ErrBox
				331	13.7785	0.569816	55.85	13.701
				332	13.7782	0.590223	56.15	13.701
				333	13.8192	0.501255	56.15	13.8406
				334	13.7833	0.464646	55.85	13.8406
				335	13.7755	0.208485	55.85	13.701
				336	13.8069	0.226367	ErrBox	ErrBox
				337	13.7544	0.117619	56.85	13.6275
				338	13.7523	0.198621	57.15	13.6275
				339	13.7239	0.148229	57.15	13.7255
				340	13.7008	0.078745	56.85	13.7255
				341	13.7617	0.212419	56.85	13.6275
				342	13.8153	0.0871347	ErrBox	ErrBox
				343	13.7849	0.127731	57.85	13.6775
				344	13.7605	0.192824	58.15	13.6775
				345	13.7963	0.233302	58.15	13.9977
				346	13.838	0.17821	57.85	13.9977
				347	13.8168	0.0955313	57.85	13.6775
				348	13.8283	0.174032	ErrBox	ErrBox
				349	13.7282	0.141694	58.85	13.7293
				350	13.8207	0.149896	59.15	13.7293
				351	13.8351	0.203216	59.15	13.9343
				352	13.744	0.134232	58.85	13.9343
				353	13.7945	0.187992	58.85	13.7293
				354	13.7355	0.129756	ErrBox	ErrBox
				355	13.8152	0.318364	59.85	13.696
				356	13.7567	0.10568	60.15	13.696
				357	13.7551	0.0971814	60.15	13.9279
				358	13.7326	0.0703576	59.85	13.9279
				359	13.8123	0.182688	59.85	13.696
				360	13.8072	0.203567	ErrBox	ErrBox
				361	13.7815	0.121316	60.85	13.6572
				362	13.6407	0.077126	61.15	13.6572
				363	13.7683	0.190717	61.15	13.8236
				364	13.7948	0.188262	60.85	13.8236
				365	13.7474	0.0358558	60.85	13.6572
				366	13.8044	0.239282	ErrBox	ErrBox
				367	13.7554	0.0844985	61.85	13.6606
				368	13.7428	0.137723	62.15	13.6606
				369	13.6528	0.0951865	62.15	13.8283
				370	13.7881	0.0884989	61.85	13.8283
				371	13.7655	0.0744476	61.85	13.6606
				372	13.7364	0.202853	ErrBox	ErrBox
				373	13.7795	0.143358	62.85	13.679
				374	13.693	0.101094	63.15	13.679
				375	13.6196	0.0928465	63.15	13.8562
				376	13.7965	0.160141	62.85	13.8562
				377	13.7683	0.0934468	62.85	13.679
				378	13.7911	0.121124	ErrBox	ErrBox
				379	13.7547	0.196227	63.85	13.7416
				380	13.762	0.065814	64.15	13.7416
				381	13.7421	0.0584969	64.15	13.9048
				382	13.7879	0.686524	63.85	13.9048
				383	13.7766	0.0719603	63.85	13.7416
				384	13.8449	0.148262	ErrBox	ErrBox
				385	13.819	0.0896227	64.85	13.6966
				386	13.7679	0.0835578	65.15	13.6966
				387	13.7345	0.0693926	65.15	13.8352
				388	13.7046	0.0595827	64.85	13.8352
				389	13.7773	0.0915031	64.85	13.6966
				390	13.788	0.0934473	ErrBox	ErrBox
				391	13.7377	0.0947692	65.85	13.6444
				392	13.7201	0.0857656	66.15	13.6444
				393	13.7633	0.0773241	66.15	13.8351
				394	13.7929	0.0852005	65.85	13.8351
				395	13.7576	0.285243	65.85	13.6444
				396	13.7218	0.0734915	ErrBox	ErrBox
				397	13.7475	0.0963964	66.85	13.3338
				398	13.7502	0.0991838	67.15	13.3338
				399	13.6999	0.0549565	67.15	13.6921
				400	13.74	0.125594	66.85	13.6921
				401	13.7314	0.163997	66.85	13.3338
				402	13.7872	0.126372	ErrBox	ErrBox
				403	13.7297	0.0766775	67.85	13.1215
				404	13.8303	1.0241	68.15	13.1215
				405	13.8963	0.512095	68.15	13.961
				406	13.8075	0.569758	67.85	13.961
				407	13.7781	0.510865	67.85	13.1215
				408	13.8651	0.540943	ErrBox	ErrBox
				409	13.8718	0.93777	68.85	13.0354
				410	13.8195	0.78674	69.15	13.0354
				411	13.7601	0.408853	69.15	14.0412
				412	13.7558	0.568887	68.85	14.0412
				413	13.7726	0.60885	68.85	13.0354
				414	13.7563	0.489402	ErrBox	ErrBox
				415	13.789	0.386007	69.85	13.4809
				416	13.7858	1.0772	70.15	13.4809
				417	13.7435	0.391496	70.15	13.8229
				418	13.7808	0.613967	69.85	13.8229
				419	13.7629	0.559832	69.85	13.4809
				420	13.7786	0.685729	ErrBox	ErrBox
				421	13.8265	0.838536	70.85	13.0558
				422	13.7988	0.740095	71.15	13.0558
				423	13.7419	0.611954	71.15	13.8725
				424	13.8247	0.394149	70.85	13.8725
				425	13.7634	0.516926	70.85	13.0558
				426	13.8191	0.68771	ErrBox	ErrBox
				427	13.8742	0.8747	71.85	13.121
				428	13.7866	1.2892	72.15	13.121
				429	13.7629	0.446746	72.15	13.8667
				430	13.8674	0.810219	71.85	13.8667
				431	13.9095	0.0619651	71.85	13.121
				432	13.9378	0.124845	ErrBox	ErrBox
				433	13.933	0.118275	72.85	13.1506
				434	13.9504	0.0831673	73.15	13.1506
				435	13.9179	0.0640018	73.15	13.9052
				436	13.8787	0.0820646	72.85	13.9052
				437	13.9739	0.075652	72.85	13.1506
				438	13.9282	0.0598585	ErrBox	ErrBox
				439	13.9581	0.216942	73.85	13.3484
				440	14.114	0.156813	74.15	13.3484
				441	13.928	0.0779601	74.15	13.7123
				442	13.9633	0.116771	73.85	13.7123
				443	13.9497	0.117313	73.85	13.3484
				444	13.9933	0.0922496	ErrBox	ErrBox
				445	13.8728	0.150607	74.85	13.4125
				446	13.8723	0.0601924	75.15	13.4125
				447	13.9964	0.0146166	75.15	13.8444
				448	13.8982	0.0662492	74.85	13.8444
				449	14.0051	0.1442	74.85	13.4125
				450	13.9048	0.136748	ErrBox	ErrBox
				451	14.0132	0.108006	75.85	13.3855
				452	13.9219	0.122864	76.15	13.3855
				453	13.9663	0.129502	76.15	13.7822
				454	13.862	0.154413	75.85	13.7822
				455	13.9031	0.0833524	75.85	13.3855
				456	13.9553	0.0837618	ErrBox	ErrBox
				457	13.9463	0.0782702	76.85	13.3287
				458	13.8821	0.189396	77.15	13.3287
				459	13.9748	0.193094	77.15	13.7602
				460	13.9356	0.125327	76.85	13.7602
				461	13.9821	0.20846	76.85	13.3287
				462	13.9441	0.0945818	ErrBox	ErrBox
				463	13.9824	0.264571	77.85	13.3632
				464	13.9563	0.189424	78.15	13.3632
				465	13.9833	0.139028	78.15	13.7105
				466	13.9918	0.184194	77.85	13.7105
				467	13.9537	0.136884	77.85	13.3632
				468	13.9625	0.144348	ErrBox	ErrBox
				469	13.9881	0.32886	78.85	13.2547
				470	13.9178	0.366992	79.15	13.2547
				471	13.9152	0.124629	79.15	13.967
				472	13.957	0.124427	78.85	13.967
				473	13.9978	0.505315	78.85	13.2547
				474	13.974	0.176551	ErrBox	ErrBox
				475	13.9325	0.0913995	79.85	13.4496
				476	13.9295	0.295804	80.15	13.4496
				477	13.9179	0.0827271	80.15	13.7385
				478	13.9361	0.096347	79.85	13.7385
				479	14.0076	0.17368	79.85	13.4496
				480	13.9814	0.119237	ErrBox	ErrBox
				481	13.9854	0.21972	80.85	13.401
				482	13.9637	0.140072	81.15	13.401
				483	13.933	0.100286	81.15	13.6334
				484	13.9553	0.161469	80.85	13.6334
				485	13.9536	0.198989	80.85	13.401
				486	13.9328	0.319309	ErrBox	ErrBox
				487	13.8729	0.343318	81.85	13.5047
				488	13.9421	0.152482	82.15	13.5047
				489	13.9272	0.275198	82.15	13.7803
				490	13.9643	0.214352	81.85	13.7803
				491	14.0461	0.204489	81.85	13.5047
				492	14.0363	0.226254	ErrBox	ErrBox
				493	14.0352	0.237947	82.85	13.4816
				494	13.9536	0.0955128	83.15	13.4816
				495	13.969	0.271153	83.15	13.8842
				496	13.9853	0.119323	82.85	13.8842
				497	13.8977	0.376668	82.85	13.4816
				498	13.9861	0.284158	ErrBox	ErrBox
				499	14.0494	0.256478	83.85	13.5512
				500	14.0306	0.151118	84.15	13.5512
				501	14.0288	0.233935	84.15	13.8944
				502	13.8911	0.145851	83.85	13.8944
				503	14.0536	0.131332	83.85	13.5512
				504	14.0367	0.265562	ErrBox	ErrBox
				505	13.9796	0.153993	84.85	13.1611
				506	13.9116	0.333312	85.15	13.1611
				507	13.9613	0.136802	85.15	14.2359
				508	14.0345	0.275744	84.85	14.2359
				509	13.9733	0.159649	84.85	13.1611
				510	13.9619	0.187123	ErrBox	ErrBox
				511	14.0381	0.225856	85.85	13.367
				512	13.9613	0.141966	86.15	13.367
				513	14.0385	0.251151	86.15	13.812
				514	13.624	0.165528	85.85	13.812
				515	13.7027	0.177508	85.85	13.367
				516	13.6539	0.202975	ErrBox	ErrBox
				517	13.6698	0.268564	86.85	13.535
				518	13.6826	0.323507	87.15	13.535
				519	13.6491	0.272249	87.15	13.8866
				520	13.5226	0.263588	86.85	13.8866
				521	13.5933	0.365422	86.85	13.535
				522	13.6556	0.422429	ErrBox	ErrBox
				523	13.6168	0.31273	87.85	13.1792
				524	13.5208	0.312632	88.15	13.1792
				525	13.5686	0.332477	88.15	14.0464
				526	13.5589	0.258984	87.85	14.0464
				527	13.6234	0.484543	87.85	13.1792
				528	13.5658	0.404598	ErrBox	ErrBox
				529	13.6687	0.567313	88.85	13.422
				530	13.5198	0.355776	89.15	13.422
				531	13.5406	0.29656	89.15	13.9074
				532	13.6659	0.437079	88.85	13.9074
				533	13.6381	0.448494	88.85	13.422
				534	13.5371	0.302709	ErrBox	ErrBox
				535	13.6348	0.339758	89.85	13.4679
				536	13.5322	0.192954	90.15	13.4679
				537	13.6032	0.433676	90.15	13.8241
				538	13.4637	0.392615	89.85	13.8241
				539	13.6282	0.216316	89.85	13.4679
				540	13.7487	0.176317	ErrBox	ErrBox
				541	13.694	0.202758	90.85	13.53
				542	13.6978	0.131411	91.15	13.53
				543	13.7492	0.180323	91.15	13.7812
				544	13.8011	0.161121	90.85	13.7812
				545	13.7688	0.157757	90.85	13.53
				546	13.8265	0.286287	ErrBox	ErrBox
				547	13.707	0.171066	91.85	13.3772
				548	13.6669	0.113797	92.15	13.3772
				549	13.7217	0.110939	92.15	13.749
				550	13.7162	0.190446	91.85	13.749
				551	13.678	0.132747	91.85	13.3772
				552	13.7318	0.144387	ErrBox	ErrBox
				553	13.7619	0.15152	92.85	13.3588
				554	13.8058	0.156161	93.15	13.3588
				555	13.7183	0.188826	93.15	14.3092
				556	13.6597	0.117525	92.85	14.3092
				557	13.7181	0.181686	92.85	13.3588
				558	13.7694	0.187024	ErrBox	ErrBox
				559	13.7187	0.149356	93.85	13.3943
				560	13.7052	0.189944	94.15	13.3943
				561	13.7618	0.148619	94.15	14.2215
				562	13.7228	0.154622	93.85	14.2215
				563	13.7459	0.128244	93.85	13.3943
				564	13.6284	0.108851	ErrBox	ErrBox
				565	13.7323	0.172025	94.85	13.3767
				566	13.7534	0.150903	95.15	13.3767
				567	13.682	0.169846	95.15	14.3134
				568	13.6632	0.125257	94.85	14.3134
				569	13.6439	0.0924858	94.85	13.3767
				570	13.7141	0.203908	ErrBox	ErrBox
				571	13.7008	0.0853788	95.85	13.2368
				572	13.7792	0.225795	96.15	13.2368
				573	13.8594	0.357784	96.15	14.2862
				574	13.7321	0.166749	95.85	14.2862
				575	13.8562	0.0656715	95.85	13.2368
				576	13.8437	0.0899504	ErrBox	ErrBox
				577	13.8172	0.15557	96.85	13.3761
				578	13.8513	0.129462	97.15	13.3761
				579	13.8406	0.131394	97.15	13.9958
				580	13.8135	0.065516	96.85	13.9958
				581	13.8915	0.0999702	96.85	13.3761
				582	13.8421	0.14001	ErrBox	ErrBox
				583	13.83	0.160151	97.85	13.4673
				584	13.8287	0.0665896	98.15	13.4673
				585	13.8176	0.117531	98.15	13.8757
				586	13.8316	0.0616075	97.85	13.8757
				587	13.8359	0.109007	97.85	13.4673
				588	13.8325	0.103586	ErrBox	ErrBox
				589	13.8502	0.101086	98.85	13.3211
				590	13.8437	0.0880578	99.15	13.3211
				591	13.8165	0.0472363	99.15	14.0446
				592	13.814	0.0768609	98.85	14.0446
				593	13.8222	0.0696282	98.85	13.3211
				594	13.8319	0.0845008	ErrBox	ErrBox
				595	13.851	0.0639596	99.85	13.4164
				596	13.8183	0.0973385	100.15	13.4164
				597	13.9216	0.31477	100.15	13.8401
				598	13.8426	0.29824	99.85	13.8401
				599	13.9076	0.296768	99.85	13.4164
				600	13.8471	0.454527	ErrBox	ErrBox
				601	13.7837	0.284994	100.85	13.5239
				602	13.7162	0.610774	101.15	13.5239
				603	13.8961	0.375852	101.15	13.8139
				604	13.8245	0.356772	100.85	13.8139
				605	13.8221	0.568907	100.85	13.5239
				606	13.8392	0.810029	ErrBox	ErrBox
				607	14.0404	0.653888	101.85	13.3865
				608	13.9313	0.456861	102.15	13.3865
				609	13.9702	0.611484	102.15	13.9449
				610	13.9668	0.565648	101.85	13.9449
				611	13.896	0.554383	101.85	13.3865
				612	13.998	0.62778	ErrBox	ErrBox
				613	13.9586	0.539974	102.85	13.2373
				614	13.961	0.523574	103.15	13.2373
				615	13.9734	0.555502	103.15	14.0839
				616	14.0443	0.99258	102.85	14.0839
				617	13.9409	0.556162	102.85	13.2373
				618	13.9506	0.676401	ErrBox	ErrBox
				619	13.9356	0.509963	103.85	13.5257
				620	13.9166	0.602077	104.15	13.5257
				621	13.9575	0.760849	104.15	13.7662
				622	13.9738	0.661249	103.85	13.7662
				623	14.0145	0.867276	103.85	13.5257
				624	14.0344	0.774164	ErrBox	ErrBox
				625	13.9964	0.554296	104.85	13.5558
				626	13.9682	0.545844	105.15	13.5558
				627	14.0307	0.780341	105.15	13.8645
				628	14.0479	0.50454	104.85	13.8645
				629	13.9517	0.592536	104.85	13.5558
				630	13.9476	0.50481	ErrBox	ErrBox
				631	13.9449	0.502271	105.85	13.398
				632	14.0192	1.23841	106.15	13.398
				633	13.9391	0.493332	106.15	13.8561
				634	13.9931	1.10688	105.85	13.8561
				635	13.998	0.670939	105.85	13.398
				636	14.0375	1.03256	ErrBox	ErrBox
				637	13.9998	0.783755	106.85	13.4335
				638	13.604	0.432476	107.15	13.4335
				639	13.6077	0.284715	107.15	13.8458
				640	13.6018	0.612652	106.85	13.8458
				641	13.5565	0.389806	106.85	13.4335
				642	13.5653	0.3888	ErrBox	ErrBox
				643	13.6022	0.392407	107.85	13.4986
				644	13.5475	0.408982	108.15	13.4986
				645	13.5555	0.32807	108.15	13.7675
				646	13.5707	0.504484	107.85	13.7675
				647	13.5411	0.365965	107.85	13.4986
				648	13.5428	0.373492	ErrBox	ErrBox
				649	13.5456	0.328428	108.85	13.4595
				650	13.5884	0.46134	109.15	13.4595
				651	13.5917	0.608669	109.15	13.8085
				652	13.5729	0.496521	108.85	13.8085
				653	13.5864	0.606951	108.85	13.4595
				654	13.5604	0.37695	ErrBox	ErrBox
				655	13.5759	0.505615	109.85	13.3559
				656	13.5519	0.489931	110.15	13.3559
				657	13.6308	0.460379	110.15	13.8525
				658	13.5632	0.443997	109.85	13.8525
				659	13.5561	0.468279	109.85	13.3559
				660	13.84	0.114591	ErrBox	ErrBox
				661	13.7738	0.0813606	110.85	13.452
				662	13.8099	0.0590689	111.15	13.452
				663	13.8885	0.116847	111.15	13.7654
				664	13.8246	0.0793499	110.85	13.7654
				665	13.7605	0.117896	110.85	13.452
				666	13.7741	0.0501495	ErrBox	ErrBox
				667	13.7621	0.0668897	111.85	13.4793
				668	13.7607	0.0598093	112.15	13.4793
				669	13.8089	0.120995	112.15	13.8632
				670	13.8245	0.135752	111.85	13.8632
				671	13.8782	0.13227	111.85	13.4793
				672	13.8737	0.150111	ErrBox	ErrBox
				673	13.8402	0.0751067	112.85	13.5276
				674	13.7538	0.0532639	113.15	13.5276
				675	13.812	0.0987715	113.15	13.739
				676	13.7576	0.0997963	112.85	13.739
				677	13.8092	0.0978525	112.85	13.5276
				678	13.8095	0.161927	ErrBox	ErrBox
				679	13.7646	0.124445	113.85	13.467
				680	13.8111	0.0729675	114.15	13.467
				681	13.7305	0.0565946	114.15	13.7623
				682	13.7895	0.0685805	113.85	13.7623
				683	13.8245	0.0933391	113.85	13.467
				684	13.8272	0.090272	ErrBox	ErrBox
				685	13.8242	0.130861	114.85	13.3579
				686	13.8809	0.0787743	115.15	13.3579
				687	13.7784	0.0621744	115.15	13.7034
				688	13.8509	0.11784	114.85	13.7034
				689	13.7404	0.0434227	114.85	13.3579
				690	13.7986	0.195108	ErrBox	ErrBox
				691	13.7999	0.0506929	115.85	13.4581
				692	13.7692	0.0800705	116.15	13.4581
				693	13.7566	0.0661417	116.15	13.7007
				694	13.8549	0.0952496	115.85	13.7007
				695	13.8193	0.108448	115.85	13.4581
				696	13.8325	0.166828	ErrBox	ErrBox
				697	13.7829	0.0992208	116.85	13.5039
				698	13.7974	0.148417	117.15	13.5039
				699	13.7457	0.168389	117.15	13.6129
				700	13.7995	0.135522	116.85	13.6129
				701	13.8291	0.128202	116.85	13.5039
				702	13.7469	0.136064	ErrBox	ErrBox
				703	13.881	0.175313	117.85	13.4527
				704	13.7695	0.13043	118.15	13.4527
				705	13.8081	0.0936343	118.15	13.7214
				706	13.7396	0.1123	117.85	13.7214
				707	13.8171	0.157271	117.85	13.4527
				708	13.7839	0.124137	ErrBox	ErrBox
				709	13.8272	0.168691	118.85	13.5249
				710	13.8818	0.215451	119.15	13.5249
				711	13.8195	0.102184	119.15	13.7415
				712	13.8085	0.223436	118.85	13.7415
				713	13.8388	0.126457	118.85	13.5249
				714	13.7945	0.101668	ErrBox	ErrBox
				715	13.8262	0.166553	119.85	13.4662
				716	13.8003	0.156389	120.15	13.4662
				717	13.8885	0.254854	120.15	13.669
				718	13.8145	0.14313	119.85	13.669
				719	13.8036	0.114435	119.85	13.4662
				720	13.8301	0.141322	ErrBox	ErrBox
				721	13.8409	0.200098	120.85	13.4614
				722	13.7783	0.220361	121.15	13.4614
				723	13.8441	0.157275	121.15	13.6639
				724	13.8255	0.161439	120.85	13.6639
				725	13.868	0.147217	120.85	13.4614
				726	13.8234	0.192181	ErrBox	ErrBox
				727	13.861	0.163154	121.85	13.4817
				728	13.858	0.196332	122.15	13.4817
				729	14.0905	0.142209	122.15	13.5823
				730	14.1081	0.10119	121.85	13.5823
				731	14.1133	0.20193	121.85	13.4817
				732	14.1636	0.136935	ErrBox	ErrBox
				733	14.0701	0.163149	122.85	13.4605
				734	14.1798	0.319838	123.15	13.4605
				735	14.0229	0.220468	123.15	13.6358
				736	14.0417	0.173526	122.85	13.6358
				737	14.129	0.225141	122.85	13.4605
				738	14.0398	0.158614	ErrBox	ErrBox
				739	14.1612	0.209829	123.85	13.4387
				740	14.0961	0.11555	124.15	13.4387
				741	14.0663	0.231109	124.15	13.5594
				742	14.0262	0.314749	123.85	13.5594
				743	14.0238	0.146629	123.85	13.4387
				744	14.0928	0.152663	ErrBox	ErrBox
				745	14.1651	0.218752	124.85	13.4676
				746	13.8304	0.14534	125.15	13.4676
				747	13.7448	0.184086	125.15	13.716
				748	13.73	0.0681278	124.85	13.716
				749	13.7729	0.0972852	124.85	13.4676
				750	13.6921	0.115705	ErrBox	ErrBox
				751	13.683	0.214653	125.85	13.4564
				752	13.7012	0.067344	126.15	13.4564
				753	13.7594	0.164328	126.15	13.7191
				754	13.7261	0.106299	125.85	13.7191
				755	13.735	0.228784	125.85	13.4564
				756	13.674	0.0700188	ErrBox	ErrBox
				757	13.6482	0.0987694	126.85	13.4422
				758	13.6636	0.0972157	127.15	13.4422
				759	13.6983	0.128978	127.15	13.5828
				760	13.6604	0.0745874	126.85	13.5828
				761	13.662	0.139071	126.85	13.4422
				762	13.7685	0.0979946	ErrBox	ErrBox
				763	13.6779	0.0522784	127.85	13.4696
				764	13.6778	0.119944	128.15	13.4696
				765	13.7826	0.0880994	128.15	13.7449
				766	13.6759	0.118002	127.85	13.7449
				767	13.7351	0.131218	127.85	13.4696
				768	13.724	0.120054	ErrBox	ErrBox
				769	13.7163	0.157631	128.85	13.4494
				770	13.6959	0.121495	129.15	13.4494
				771	13.658	0.423957	129.15	13.66
				772	13.5999	0.0468556	128.85	13.66
				773	13.6372	0.139169	128.85	13.4494
				774	13.6126	0.0567182	ErrBox	ErrBox
				775	13.635	0.0661078	129.85	13.2236
				776	13.6318	0.222716	130.15	13.2236
				777	13.6674	0.105543	130.15	13.9797
				778	13.7458	0.165496	129.85	13.9797
				779	13.646	0.136366	129.85	13.2236
				780	13.6387	0.0661314	ErrBox	ErrBox
				781	13.6741	0.11135	130.85	13.4772
				782	13.706	0.147635	131.15	13.4772
				783	13.7039	0.0976363	131.15	13.5609
				784	13.69	0.156124	130.85	13.5609
				785	13.6362	0.0660604	130.85	13.4772
				786	13.5996	0.346192	ErrBox	ErrBox
				787	13.6684	0.135051	131.85	13.4794
				788	13.6514	0.146144	132.15	13.4794
				789	13.7256	0.135094	132.15	13.6975
				790	13.7109	0.119301	131.85	13.6975
				791	13.6334	0.181802	131.85	13.4794
				792	13.5754	0.0626813	ErrBox	ErrBox
				793	13.6888	0.142551	132.85	13.4463
				794	13.6488	0.124813	133.15	13.4463
				795	13.7183	0.132846	133.15	13.5739
				796	13.5646	0.101697	132.85	13.5739
				797	13.6759	0.125455	132.85	13.4463
				798	13.6939	0.181003	ErrBox	ErrBox
				799	13.6545	0.114647	133.85	13.4462
				800	13.5896	0.0871569	134.15	13.4462
				801	13.5657	0.106336	134.15	13.623
				802	13.5772	0.0944297	133.85	13.623
				803	13.6261	0.111212	133.85	13.4462
				804	13.6396	0.369215	ErrBox	ErrBox
				805	13.6594	0.309489	134.85	13.529
				806	13.6355	0.0871111	135.15	13.529
				807	13.5737	0.102025	135.15	13.7441
				808	13.6497	0.116807	134.85	13.7441
				809	13.7329	0.301352	134.85	13.529
				810	13.6786	0.156202	ErrBox	ErrBox
				811	13.7674	0.188651	135.85	13.4502
				812	13.7258	0.20979	136.15	13.4502
				813	13.7574	0.237171	136.15	13.5959
				814	13.5828	0.335414	135.85	13.5959
				815	13.6876	0.309733	135.85	13.4502
				816	13.7258	0.362458	ErrBox	ErrBox
				817	13.7767	0.421414	136.85	13.4189
				818	13.7827	0.277216	137.15	13.4189
				819	13.7326	0.205853	137.15	13.6268
				820	13.6658	0.291777	136.85	13.6268
				821	13.7079	0.195933	136.85	13.4189
				822	13.6785	0.340204	ErrBox	ErrBox
				823	13.7498	0.525126	137.85	13.4273
				824	13.5835	0.262704	138.15	13.4273
				825	13.6279	0.36244	138.15	13.689
				826	13.6526	0.277822	137.85	13.689
				827	13.7197	0.208624	137.85	13.4273
				828	13.6904	0.213159	ErrBox	ErrBox
				829	13.7128	0.171002	138.85	13.4223
				830	13.7657	0.300962	139.15	13.4223
				831	13.7097	0.166121	139.15	13.668
				832	13.7344	0.18653	138.85	13.668
				833	13.6647	0.240457	138.85	13.4223
				834	13.611	0.213765	ErrBox	ErrBox
				835	13.7609	0.239085	139.85	13.4951
				836	13.654	0.206188	140.15	13.4951
				837	13.6264	0.222417	140.15	13.6239
				838	13.6755	0.46399	139.85	13.6239
				839	13.5934	0.177287	139.85	13.4951
				840	13.6413	0.267201	ErrBox	ErrBox
				841	13.6156	0.236542	140.85	13.4559
				842	13.6286	0.221438	141.15	13.4559
				843	13.6159	0.208184	141.15	13.7341
				844	13.6892	0.0630123	140.85	13.7341
				845	13.712	0.101072	140.85	13.4559
				846	13.7027	0.0599043	ErrBox	ErrBox
				847	13.6951	0.0696809	141.85	13.4228
				848	13.7368	0.207198	142.15	13.4228
				849	13.7601	0.358847	142.15	13.5406
				850	13.7331	0.0651912	141.85	13.5406
				851	13.8128	0.181646	141.85	13.4228
				852	13.7722	0.0919371	ErrBox	ErrBox
				853	13.7652	0.0895784	142.85	13.4357
				854	13.7376	0.0560925	143.15	13.4357
				855	13.725	0.0861792	143.15	13.6493
				856	13.7479	0.120013	142.85	13.6493
				857	13.6843	0.0682786	142.85	13.4357
				858	13.7496	0.109341	ErrBox	ErrBox
				859	13.716	0.0638228	143.85	13.4628
				860	13.7033	0.107346	144.15	13.4628
				861	13.7314	0.163367	144.15	13.6056
				862	13.7574	0.10555	143.85	13.6056
				863	13.733	0.104503	143.85	13.4628
				864	13.7186	0.0569323	ErrBox	ErrBox
				865	13.7131	0.115612	144.85	13.4466
				866	13.7786	0.196691	145.15	13.4466
				867	13.8048	0.576481	145.15	13.7162
				868	13.8169	0.594365	144.85	13.7162
				869	13.8432	0.753597	144.85	13.4466
				870	13.9087	0.70753	ErrBox	ErrBox
				871	13.8965	0.525937	145.85	13.5146
				872	13.8494	0.537989	146.15	13.5146
				873	13.8047	0.626556	146.15	14.022
				874	13.9102	0.437262	145.85	14.022
				875	13.8827	0.596749	145.85	13.5146
				876	13.8045	0.480878	ErrBox	ErrBox
				877	13.8669	0.611086	146.85	13.6806
				878	13.8176	0.724487	147.15	13.6806
				879	13.8079	0.489958	147.15	14.0454
				880	13.8017	0.529495	146.85	14.0454
				881	13.8001	0.515717	146.85	13.6806
				882	13.832	0.64605	ErrBox	ErrBox
				883	13.8136	0.718598	147.85	13.5791
				884	13.8775	0.822195	148.15	13.5791
				885	13.9135	0.780109	148.15	14.0121
				886	13.8532	0.521459	147.85	14.0121
				887	13.8518	0.555229	147.85	13.5791
				888	13.8309	0.50048	ErrBox	ErrBox
				889	13.8934	0.474103	148.85	13.6308
				890	13.7841	0.470056	149.15	13.6308
				891	13.8557	0.554121	149.15	14.0083
				892	13.8871	0.504583	148.85	14.0083
				893	13.8892	0.397618	148.85	13.6308
				894	13.9021	0.705487	ErrBox	ErrBox
				895	13.8133	0.577872	149.85	13.4969
				896	13.854	0.525581	150.15	13.4969
				897	13.8281	0.606983	150.15	14.2676
				898	13.8649	0.362097	149.85	14.2676
				899	13.8446	0.590244	149.85	13.4969
				900	13.9123	0.649559	ErrBox	ErrBox
				901	13.7514	0.366155	150.85	13.6343
				902	13.7221	0.192468	151.15	13.6343
				903	13.7028	0.245158	151.15	14.0078
				904	13.7484	0.366951	150.85	14.0078
				905	13.7116	0.159049	150.85	13.6343
				906	13.7702	0.280984	ErrBox	ErrBox
				907	13.8374	0.398108	151.85	13.6761
				908	13.7045	0.192442	152.15	13.6761
				909	13.7033	0.236853	152.15	13.9858
				910	13.8034	0.263511	151.85	13.9858
				911	13.7764	0.104015	151.85	13.6761
				912	13.7771	0.189823	ErrBox	ErrBox
				913	13.7156	0.302439	152.85	13.5721
				914	13.7317	0.198107	153.15	13.5721
				915	13.6488	0.144477	153.15	13.9389
				916	13.767	0.195491	152.85	13.9389
				917	13.7724	0.166443	152.85	13.5721
				918	13.6718	0.192054	ErrBox	ErrBox
				919	13.7897	0.174952	153.85	13.7282
				920	13.7984	0.181059	154.15	13.7282
				921	13.7651	0.136162	154.15	13.9508
				922	13.7687	0.403181	153.85	13.9508
				923	13.6951	0.144515	153.85	13.7282
				924	13.7369	0.390835	ErrBox	ErrBox
				925	13.7968	0.247139	154.85	13.5485
				926	13.6619	0.305357	155.15	13.5485
				927	13.697	0.476096	155.15	13.9701
				928	13.7716	0.168128	154.85	13.9701
				929	13.789	0.220512	154.85	13.5485
				930	13.6869	0.136409	ErrBox	ErrBox
				931	13.7785	0.319507	155.85	13.8032
				932	13.759	0.192299	156.15	13.8032
				933	13.7244	0.212366	156.15	14.033
				934	13.7639	0.19727	155.85	14.033
				935	13.6558	0.253305	155.85	13.8032
				936	13.7228	0.168176	ErrBox	ErrBox
				937	13.7015	0.167777	156.85	13.6939
				938	13.8512	0.523817	157.15	13.6939
				939	13.7262	0.130447	157.15	14.054
				940	13.7179	0.148549	156.85	14.054
				941	13.7436	0.124229	156.85	13.6939
				942	13.7524	0.420307	ErrBox	ErrBox
				943	13.6453	0.425253	157.85	13.428
				944	13.8062	0.572641	158.15	13.428
				945	13.817	0.526146	158.15	14.1545
				946	13.8471	0.671982	157.85	14.1545
				947	13.8314	0.56679	157.85	13.428
				948	13.8283	0.510994	ErrBox	ErrBox
				949	13.815	0.533258	158.85	13.6525
				950	13.8413	0.5198	159.15	13.6525
				951	13.8257	0.565992	159.15	14.1342
				952	13.8532	0.597506	158.85	14.1342
				953	13.853	0.579617	158.85	13.6525
				954	13.8442	0.491594	ErrBox	ErrBox
				955	13.8537	0.49741	159.85	13.7829
				956	13.8429	0.471938	160.15	13.7829
				957	13.8968	0.681152	160.15	13.9179
				958	13.8426	0.548849	159.85	13.9179
				959	13.8112	0.546729	159.85	13.7829
				960	13.8393	0.50636	ErrBox	ErrBox
				961	13.8245	0.531731	160.85	13.7742
				962	13.8155	0.674523	161.15	13.7742
				963	13.8536	0.585616	161.15	13.9596
				964	13.8533	0.555641	160.85	13.9596
				965	13.8825	0.547595	160.85	13.7742
				966	13.8164	0.53355	ErrBox	ErrBox
				967	13.8475	0.465547	161.85	13.583
				968	13.8738	0.617737	162.15	13.583
				969	13.8333	0.532478	162.15	14.0772
				970	13.8734	0.478046	161.85	14.0772
				971	13.8327	0.536595	161.85	13.583
				972	13.9011	0.705237	ErrBox	ErrBox
				973	13.8951	0.897233	162.85	13.5348
				974	13.8364	0.526093	163.15	13.5348
				975	13.8039	0.409135	163.15	14.0229
				976	13.8173	0.516853	162.85	14.0229
				977	13.8178	0.423751	162.85	13.5348
				978	13.7992	0.509396	ErrBox	ErrBox
				979	13.8076	0.25443	163.85	13.6351
				980	13.8124	0.0779493	164.15	13.6351
				981	13.8014	0.0944879	164.15	13.8486
				982	13.722	0.108434	163.85	13.8486
				983	13.8173	0.616622	163.85	13.6351
				984	13.8674	0.124868	ErrBox	ErrBox
				985	13.8563	0.544542	164.85	13.5377
				986	13.7537	0.374917	165.15	13.5377
				987	13.7689	0.486184	165.15	14.0199
				988	13.8207	0.0816415	164.85	14.0199
				989	13.7797	0.329225	164.85	13.5377
				990	13.8733	0.209479	ErrBox	ErrBox
				991	13.7823	0.194498	165.85	13.6245
				992	13.7352	0.160156	166.15	13.6245
				993	13.8218	0.500556	166.15	14.0917
				994	13.8272	0.131427	165.85	14.0917
				995	13.6888	0.0387238	165.85	13.6245
				996	13.8103	0.224398	ErrBox	ErrBox
				997	13.7652	0.125835	166.85	13.6814
				998	13.7938	0.270778	167.15	13.6814
				999	13.6961	0.0808558	167.15	14.0022
				1000	13.789	0.12489	166.85	14.0022
				1001	13.7865	0.0685543	166.85	13.6814
				1002	13.7432	0.0686063	ErrBox	ErrBox
				1003	13.8029	0.301382	167.85	13.7455
				1004	13.7743	0.153215	168.15	13.7455
				1005	13.781	0.23257	168.15	13.9195
				1006	13.7949	0.145535	167.85	13.9195
				1007	13.8078	0.0775582	167.85	13.7455
				1008	13.8193	0.106435	ErrBox	ErrBox
				1009	13.8207	0.12278	168.85	13.2545
				1010	13.7332	0.0968157	169.15	13.2545
				1011	13.8021	0.0853818	169.15	14.3705
				1012	13.7045	0.115516	168.85	14.3705
				1013	13.7569	0.13488	168.85	13.2545
				1014	13.7588	0.155281	ErrBox	ErrBox
				1015	13.785	0.155899	169.85	13.7621
				1016	13.7786	0.0903819	170.15	13.7621
				1017	13.7284	0.138121	170.15	14.0062
				1018	13.7415	0.280481	169.85	14.0062
				1019	13.7637	0.122299	169.85	13.7621
				1020	13.818	0.111006	ErrBox	ErrBox
				1021	13.7938	0.208692	170.85	13.5957
				1022	13.7152	0.130812	171.15	13.5957
				1023	13.764	0.076109	171.15	14.0781
				1024	13.767	0.0897857	170.85	14.0781
				1025	13.7614	0.0801556	170.85	13.5957
				1026	13.8272	0.234811	ErrBox	ErrBox
				1027	13.6695	0.0596235	171.85	13.5855
				1028	13.6567	0.177411	172.15	13.5855
				1029	13.7697	0.175348	172.15	13.8326
				1030	13.7189	0.138996	171.85	13.8326
				1031	13.8034	0.190885	171.85	13.5855
				1032	13.7395	0.223128	ErrBox	ErrBox
				1033	13.7489	0.159741	172.85	13.5151
				1034	13.7631	0.121768	173.15	13.5151
				1035	13.656	0.151673	173.15	14.0132
				1036	13.7746	0.216294	172.85	14.0132
				1037	13.7765	0.434554	172.85	13.5151
				1038	13.8114	0.233361	ErrBox	ErrBox
				1039	13.7225	0.088526	173.85	13.6415
				1040	13.8448	0.185606	174.15	13.6415
				1041	13.7521	0.0809438	174.15	13.833
				1042	13.7911	0.305478	173.85	13.833
				1043	13.7823	0.0894485	173.85	13.6415
				1044	13.8594	0.115153	ErrBox	ErrBox
				1045	13.892	0.146834	174.85	13.5917
				1046	13.9402	0.0982796	175.15	13.5917
				1047	13.7774	0.122925	175.15	13.8097
				1048	13.797	0.0964249	174.85	13.8097
				1049	13.749	0.216794	174.85	13.5917
				1050	13.9042	0.33983	ErrBox	ErrBox
				1051	13.9045	0.19358	175.85	13.5889
				1052	13.9171	0.169197	176.15	13.5889
				1053	13.8427	0.0886846	176.15	13.8427
				1054	13.8933	0.20395	175.85	13.8427
				1055	13.8866	0.219599	175.85	13.5889
				1056	13.8277	0.0541131	ErrBox	ErrBox
				1057	13.643	0.0918889	176.85	13.6805
				1058	13.5877	0.231647	177.15	13.6805
				1059	13.6462	0.119776	177.15	13.9158
				1060	13.6084	0.502166	176.85	13.9158
				1061	13.536	0.073778	176.85	13.6805
				1062	13.6074	0.161612	ErrBox	ErrBox
				1063	13.5312	0.0709409	177.85	13.6291
				1064	13.6025	0.172696	178.15	13.6291
				1065	13.5795	0.0790043	178.15	13.9731
				1066	13.6014	0.153368	177.85	13.9731
				1067	13.6063	0.103861	177.85	13.6291
				1068	13.5501	0.0757715	ErrBox	ErrBox
				1069	13.568	0.0930738	178.85	13.5481
				1070	13.5966	0.0818266	179.15	13.5481
				1071	13.6394	0.098326	179.15	13.8939
				1072	13.5749	0.0558251	178.85	13.8939
				1073	13.6094	0.0987714	178.85	13.5481
				1074	13.6297	0.125018	ErrBox	ErrBox
				1075	13.5417	0.0934914	179.85	13.6147
				1076	13.5764	0.111821	180.15	13.6147
				1077	13.5937	0.0974993	180.15	14.0117
				1078	13.5846	0.104084	179.85	14.0117
				1079	13.5418	0.0712438	179.85	13.6147
				1080	13.604	0.0922536	ErrBox	ErrBox
				1081	13.5944	0.398636	180.85	13.7427
				1082	13.5911	0.062601	181.15	13.7427
				1083	13.6062	0.123964	181.15	13.8946
				1084	13.6118	0.21807	180.85	13.8946
				1085	13.6429	0.0819356	180.85	13.7427
				1086	13.6185	0.104889	ErrBox	ErrBox
				1087	13.604	0.117505	181.85	13.6036
				1088	13.6363	0.216293	182.15	13.6036
				1089	13.5902	0.0564074	182.15	13.8988
				1090	13.6426	0.156441	181.85	13.8988
				1091	13.586	0.0950288	181.85	13.6036
				1092	13.6172	0.0851755	ErrBox	ErrBox
				1093	13.6033	0.102539	182.85	13.6487
				1094	13.5762	0.0995435	183.15	13.6487
				1095	13.7309	0.490226	183.15	13.9644
				1096	13.7683	0.4792	182.85	13.9644
				1097	13.7283	0.508701	182.85	13.6487
				1098	13.7078	0.739412	ErrBox	ErrBox
				1099	13.7354	0.492727	183.85	13.5682
				1100	13.7115	0.338701	184.15	13.5682
				1101	13.7522	0.492053	184.15	13.8453
				1102	13.7509	0.538657	183.85	13.8453
				1103	13.7307	0.460877	183.85	13.5682
				1104	13.7073	0.520526	ErrBox	ErrBox
				1105	13.7618	0.530934	184.85	13.6098
				1106	13.7514	0.483709	185.15	13.6098
				1107	13.7386	0.433892	185.15	13.9194
				1108	13.7306	0.479717	184.85	13.9194
				1109	13.7331	0.556236	184.85	13.6098
				1110	13.7717	0.124764	ErrBox	ErrBox
				1111	13.7491	0.276247	185.85	13.6
				1112	13.744	0.103552	186.15	13.6
				1113	13.8204	0.126992	186.15	13.8331
				1114	13.8407	0.159716	185.85	13.8331
				1115	13.7714	0.0552984	185.85	13.6
				1116	13.7808	0.138787	ErrBox	ErrBox
				1117	13.8117	0.13068	186.85	13.6501
				1118	13.845	0.354821	187.15	13.6501
				1119	13.8141	0.152759	187.15	13.9252
				1120	13.754	0.11627	186.85	13.9252
				1121	13.8078	0.156295	186.85	13.6501
				1122	13.7614	0.0509678	ErrBox	ErrBox
				1123	13.8473	0.0741185	187.85	13.6248
				1124	13.8009	0.106662	188.15	13.6248
				1125	13.7957	0.0786305	188.15	13.9001
				1126	13.8142	0.119935	187.85	13.9001
				1127	13.8488	0.192064	187.85	13.6248
				1128	13.8344	0.149876	ErrBox	ErrBox
				1129	13.7346	0.144136	188.85	13.5957
				1130	13.8181	0.21087	189.15	13.5957
				1131	13.842	0.227329	189.15	13.922
				1132	13.8418	0.0902434	188.85	13.922
				1133	13.8269	0.0810597	188.85	13.5957
				1134	13.8302	0.151924	ErrBox	ErrBox
				1135	13.9093	0.147082	189.85	13.5839
				1136	13.9443	0.410974	190.15	13.5839
				1137	13.8099	0.16294	190.15	13.9697
				1138	13.8851	0.248107	189.85	13.9697
				1139	13.8735	0.202555	189.85	13.5839
				1140	13.8905	0.184361	ErrBox	ErrBox
				1141	13.923	0.458889	190.85	13.5893
				1142	13.8339	0.20728	191.15	13.5893
				1143	13.8888	0.187762	191.15	13.8916
				1144	13.8673	0.213915	190.85	13.8916
				1145	13.8985	0.377081	190.85	13.5893
				1146	13.8384	0.146386	ErrBox	ErrBox
				1147	13.9121	0.317169	191.85	13.7228
				1148	13.7886	0.176417	192.15	13.7228
				1149	13.9053	0.171297	192.15	13.8961
				1150	13.8928	0.168059	191.85	13.8961
				1151	13.8881	0.179222	191.85	13.7228
				1152	13.8636	0.152456	ErrBox	ErrBox
				1153	13.9078	0.137058	192.85	13.6765
				1154	13.9082	0.25904	193.15	13.6765
				1155	13.9705	0.251849	193.15	13.8956
				1156	13.8408	0.481986	192.85	13.8956
				1157	13.9205	0.227154	192.85	13.6765
				1158	13.8439	0.697177	ErrBox	ErrBox
				1159	13.9371	0.299038	193.85	13.7349
				1160	13.9287	0.319681	194.15	13.7349
				1161	13.8651	0.290139	194.15	13.857
				1162	13.9298	0.236972	193.85	13.857
				1163	13.8536	0.190309	193.85	13.7349
				1164	13.8737	0.226425	ErrBox	ErrBox
				1165	13.9339	0.254856	194.85	13.6421
				1166	13.8608	0.170809	195.15	13.6421
				1167	13.8361	0.108623	195.15	13.9032
				1168	13.8257	0.133459	194.85	13.9032
				1169	13.8068	0.151883	194.85	13.6421
				1170	13.8538	0.178928	ErrBox	ErrBox
				1171	13.815	0.185499	195.85	13.5853
				1172	13.8848	0.245279	196.15	13.5853
				1173	13.9605	0.286583	196.15	13.9673
				1174	13.9123	0.200092	195.85	13.9673
				1175	13.9451	0.328526	195.85	13.5853
				1176	13.9348	0.201949	ErrBox	ErrBox
				1177	13.858	0.187559	196.85	13.5646
				1178	13.816	0.13024	197.15	13.5646
				1179	13.8323	0.105901	197.15	14.0716
				1180	13.8465	0.184162	196.85	14.0716
				1181	13.8587	0.195175	196.85	13.5646
				1182	13.7899	0.154423	ErrBox	ErrBox
				1183	13.8344	0.137627	197.85	13.6099
				1184	13.9047	0.334276	198.15	13.6099
				1185	13.8774	0.206321	198.15	13.8724
				1186	13.9321	0.362004	197.85	13.8724
				1187	13.8417	0.111554	197.85	13.6099
				1188	13.9542	0.17496	ErrBox	ErrBox
				1189	13.9528	0.210401	198.85	13.524
				1190	13.9262	0.125066	199.15	13.524
				1191	13.889	0.301156	199.15	13.9454
				1192	13.9357	0.173104	198.85	13.9454
				1193	13.949	0.202128	198.85	13.524
				1194	13.9118	0.207762	ErrBox	ErrBox
				1195	13.8747	0.151395	199.85	13.6355
				1196	13.9789	0.310798	200.15	13.6355
				1197	13.8177	0.159776	200.15	13.8845
				1198	13.8615	0.100592	199.85	13.8845
				1199	13.8091	0.0946558	199.85	13.6355
				1200	13.7836	0.195709	ErrBox	ErrBox
				1201	13.839	0.198488	200.85	13.4805
				1202	13.8709	0.258357	201.15	13.4805
				1203	13.8239	0.0746113	201.15	13.9914
				1204	13.7979	0.177749	200.85	13.9914
				1205	13.7835	0.0460271	200.85	13.4805
				1206	13.7791	0.0617869	ErrBox	ErrBox
				1207	13.777	0.0689254	201.85	13.6741
				1208	13.8295	0.0984669	202.15	13.6741
				1209	13.7703	0.219845	202.15	13.8751
				1210	13.8253	0.351131	201.85	13.8751
				1211	13.8414	0.0785653	201.85	13.6741
				1212	13.8548	0.181945	ErrBox	ErrBox
				1213	13.8071	0.0543356	202.85	13.5521
				1214	13.8642	0.176177	203.15	13.5521
				1215	13.8268	0.116892	203.15	13.9163
				1216	13.8259	0.0958422	202.85	13.9163
				1217	13.8518	0.0660616	202.85	13.5521
				1218	13.8164	0.0542149	ErrBox	ErrBox
				1219	13.8434	0.145281	203.85	13.5781
				1220	13.8338	0.0604442	204.15	13.5781
				1221	13.883	0.0614923	204.15	13.9202
				1222	13.8794	0.087956	203.85	13.9202
				1223	13.8868	0.0889318	203.85	13.5781
				1224	13.7765	0.0572218	ErrBox	ErrBox
				1225	13.7931	0.0693395	204.85	13.6577
				1226	13.86	0.0678815	205.15	13.6577
				1227	13.8076	0.0595712	205.15	13.8933
				1228	13.837	0.0693879	204.85	13.8933
				1229	13.7425	0.101523	204.85	13.6577
				1230	13.8089	0.102744	ErrBox	ErrBox
				1231	13.8701	0.192442	205.85	13.5502
				1232	13.8229	0.234364	206.15	13.5502
				1233	13.755	0.281853	206.15	14.0074
				1234	13.8503	0.0925259	205.85	14.0074
				1235	13.8619	0.23749	205.85	13.5502
				1236	13.8532	0.310058	ErrBox	ErrBox
				1237	13.9072	0.258371	206.85	13.5299
				1238	13.9011	0.343267	207.15	13.5299
				1239	13.8716	0.175379	207.15	13.9202
				1240	13.8954	0.216896	206.85	13.9202
				1241	13.8898	0.15274	206.85	13.5299
				1242	13.856	0.334498	ErrBox	ErrBox
				1243	13.9105	0.114481	207.85	13.5139
				1244	13.9033	0.19685	208.15	13.5139
				1245	13.8307	0.282205	208.15	13.8699
				1246	13.8725	0.182142	207.85	13.8699
				1247	13.8851	0.173307	207.85	13.5139
				1248	13.852	0.118508	ErrBox	ErrBox
				1249	13.8805	0.176997	208.85	13.2805
				1250	13.8156	0.147264	209.15	13.2805
				1251	13.8807	0.163163	209.15	14.5554
				1252	13.8699	0.337368	208.85	14.5554
				1253	13.8664	0.184615	208.85	13.2805
				1254	13.9093	0.19246	ErrBox	ErrBox
				1255	13.8231	0.141959	209.85	13.5503
				1256	13.8059	0.169159	210.15	13.5503
				1257	13.8345	0.132036	210.15	14.3509
				1258	13.8118	0.187723	209.85	14.3509
				1259	13.9062	0.175381	209.85	13.5503
				1260	13.813	0.1681	ErrBox	ErrBox
				1261	13.7885	0.171763	210.85	13.2321
				1262	13.7969	0.276201	211.15	13.2321
				1263	13.7979	0.142306	211.15	14.6272
				1264	13.7948	0.155221	210.85	14.6272
				1265	13.8436	0.306035	210.85	13.2321
				1266	13.77	0.224476	ErrBox	ErrBox
				1267	13.8108	0.085821	211.85	13.0726
				1268	13.7205	0.0437032	212.15	13.0726
				1269	13.7759	0.055648	212.15	14.818
				1270	13.7734	0.0589964	211.85	14.818
				1271	13.6919	0.089856	211.85	13.0726
				1272	13.7303	0.0463557	ErrBox	ErrBox
				1273	13.7673	0.094823	212.85	13.3031
				1274	13.7622	0.0758515	213.15	13.3031
				1275	13.7468	0.0514146	213.15	14.42
				1276	13.7358	0.0507961	212.85	14.42
				1277	13.7706	0.0871297	212.85	13.3031
				1278	13.7583	0.14972	ErrBox	ErrBox
				1279	13.778	0.10672	213.85	13.4061
				1280	13.753	0.0519494	214.15	13.4061
				1281	13.7525	0.0567227	214.15	14.3609
				1282	13.7728	0.0782894	213.85	14.3609
				1283	13.7479	0.050948	213.85	13.4061
				1284	13.7834	0.0836533	ErrBox	ErrBox
				1285	13.7682	0.103375	214.85	13.1668
				1286	13.7701	0.0615694	215.15	13.1668
				1287	13.7769	0.0734863	215.15	14.6353
				1288	13.7622	0.0584032	214.85	14.6353
				1289	13.7258	0.0532475	214.85	13.1668
				1290	13.7232	0.0470114	ErrBox	ErrBox
				1291	13.7765	0.0720161	215.85	13.3403
				1292	13.7	0.0384836	216.15	13.3403
				1293	13.7829	0.0625472	216.15	14.5912
				1294	13.7535	0.0613339	215.85	14.5912
				1295	13.7548	0.110526	215.85	13.3403
				1296	13.719	0.0543275	ErrBox	ErrBox
				1297	13.6859	0.0481358	216.85	13.2771
				1298	13.7716	0.0856848	217.15	13.2771
				1299	13.8035	0.0770381	217.15	14.559
				1300	13.7311	0.0513798	216.85	14.559
				1301	13.7347	0.0512186	216.85	13.2771
				1302	13.7373	0.0672252	ErrBox	ErrBox
				1303	13.7682	0.0504425	217.85	13.5074
				1304	13.8084	0.150576	218.15	13.5074
				1305	13.676	0.162487	218.15	14.4727
				1306	13.7951	0.109551	217.85	14.4727
				1307	13.7312	0.168737	217.85	13.5074
				1308	13.7983	0.132934	ErrBox	ErrBox
				1309	13.7805	0.252035	218.85	13.4746
				1310	13.7615	0.230488	219.15	13.4746
				1311	13.6945	0.110761	219.15	14.4941
				1312	13.8321	0.161277	218.85	14.4941
				1313	13.7999	0.104087	218.85	13.4746
				1314	13.7648	0.100646	ErrBox	ErrBox
				1315	13.8004	0.217918	219.85	13.3246
				1316	13.8627	0.182455	220.15	13.3246
				1317	13.809	0.179252	220.15	14.377
				1318	13.7413	0.150018	219.85	14.377
				1319	13.7191	0.0783533	219.85	13.3246
				1320	13.8033	0.179687	ErrBox	ErrBox
				1321	13.7119	0.140606	220.85	13.7226
				1322	13.837	0.231268	221.15	13.7226
				1323	13.7507	0.260022	221.15	13.9362
				1324	13.8284	0.207552	220.85	13.9362
				1325	13.7736	0.0743015	220.85	13.7226
				1326	13.7858	0.201217	ErrBox	ErrBox
				1327	13.8272	0.193996	221.85	13.6804
				1328	13.7285	0.132675	222.15	13.6804
				1329	13.7576	0.120372	222.15	13.9445
				1330	13.7665	0.0922265	221.85	13.9445
				1331	13.7264	0.157751	221.85	13.6804
				1332	13.7544	0.178491	ErrBox	ErrBox
				1333	13.7344	0.0731726	222.85	13.6281
				1334	13.6875	0.112161	223.15	13.6281
				1335	13.6458	0.129907	223.15	14.0235
				1336	13.614	0.0902208	222.85	14.0235
				1337	13.6636	0.130608	222.85	13.6281
				1338	13.6614	0.140764	ErrBox	ErrBox
				1339	13.6155	0.0647007	223.85	13.6456
				1340	13.6298	0.100762	224.15	13.6456
				1341	13.6532	0.236143	224.15	14.0211
				1342	13.6807	0.205765	223.85	14.0211
				1343	13.6672	0.132917	223.85	13.6456
				1344	13.5914	0.133119	ErrBox	ErrBox
				1345	13.6494	0.235322	224.85	13.5883
				1346	13.6048	0.177998	225.15	13.5883
				1347	13.6151	0.123061	225.15	13.9612
				1348	13.6468	0.176396	224.85	13.9612
				1349	13.6823	0.208494	224.85	13.5883
				1350	13.6409	0.116428	ErrBox	ErrBox
				1351	13.698	0.138882	225.85	13.3859
				1352	13.6047	0.156531	226.15	13.3859
				1353	13.6493	0.164875	226.15	14.1088
				1354	13.6208	0.228409	225.85	14.1088
				1355	13.687	0.161051	225.85	13.3859
				1356	13.6403	0.10664	ErrBox	ErrBox
				1357	13.643	0.182066	226.85	13.5927
				1358	13.6495	0.112563	227.15	13.5927
				1359	13.7257	0.380665	227.15	13.8921
				1360	13.699	0.187224	226.85	13.8921
				1361	13.6816	0.134662	226.85	13.5927
				1362	13.7249	0.147606	ErrBox	ErrBox
				1363	13.7069	0.16138	227.85	13.4631
				1364	13.8556	0.205062	228.15	13.4631
				1365	13.8134	0.117231	228.15	14.1618
				1366	13.7568	0.15349	227.85	14.1618
				1367	13.7938	0.125238	227.85	13.4631
				1368	13.8236	0.162829	ErrBox	ErrBox
				1369	13.8275	0.235575	228.85	13.5424
				1370	13.8147	0.106125	229.15	13.5424
				1371	13.8568	0.253111	229.15	13.9732
				1372	13.8651	0.255492	228.85	13.9732
				1373	13.826	0.319604	228.85	13.5424
				1374	13.8214	0.227133	ErrBox	ErrBox
				1375	13.7769	0.120505	229.85	13.621
				1376	13.7682	0.171132	230.15	13.621
				1377	13.8256	0.130777	230.15	13.9502
				1378	13.836	0.253002	229.85	13.9502
				1379	13.8158	0.246902	229.85	13.621
				1380	13.8035	0.209254	ErrBox	ErrBox
				1381	13.8144	0.153151	230.85	13.5899
				1382	13.8514	0.290305	231.15	13.5899
				1383	13.8636	0.359061	231.15	13.8021
				1384	13.7418	0.343241	230.85	13.8021
				1385	13.8387	0.277875	230.85	13.5899
				1386	13.7327	0.179124	ErrBox	ErrBox
				1387	13.8635	0.18043	231.85	13.5069
				1388	13.7523	0.176134	232.15	13.5069
				1389	13.743	0.235981	232.15	13.9295
				1390	13.823	0.201819	231.85	13.9295
				1391	13.771	0.15889	231.85	13.5069
				1392	13.8406	0.207713	ErrBox	ErrBox
				1393	13.8013	0.209866	232.85	13.7197
				1394	13.7752	0.175915	233.15	13.7197
				1395	13.7879	0.430462	233.15	13.9934
				1396	13.7365	0.14206	232.85	13.9934
				1397	13.6153	0.169585	232.85	13.7197
				1398	13.6372	0.110767	ErrBox	ErrBox
				1399	13.7038	0.203899	233.85	13.6228
				1400	13.6485	0.136689	234.15	13.6228
				1401	13.586	0.110029	234.15	13.9337
				1402	13.6712	0.0877425	233.85	13.9337
				1403	13.661	0.07525	233.85	13.6228
				1404	13.5574	0.113675	ErrBox	ErrBox
				1405	13.7626	0.0969275	234.85	13.6106
				1406	13.7471	0.152051	235.15	13.6106
				1407	13.6103	0.11466	235.15	13.9238
				1408	13.727	0.155071	234.85	13.9238
				1409	13.6105	0.149342	234.85	13.6106
				1410	13.6709	0.186993	ErrBox	ErrBox
				1411	13.7439	0.118735	235.85	13.6217
				1412	13.7183	0.151001	236.15	13.6217
				1413	13.651	0.209627	236.15	13.9081
				1414	13.7015	0.0468069	235.85	13.9081
				1415	13.6653	0.122246	235.85	13.6217
				1416	13.7483	0.0850653	ErrBox	ErrBox
				1417	13.7801	0.214181	236.85	13.5504
				1418	13.6757	0.129948	237.15	13.5504
				1419	13.5774	0.0926888	237.15	14.0118
				1420	13.6579	0.0772072	236.85	14.0118
				1421	13.9451	0.241247	236.85	13.5504
				1422	13.8707	0.202552	ErrBox	ErrBox
				1423	13.9025	0.222149	237.85	13.5883
				1424	14.0179	0.114819	238.15	13.5883
				1425	13.9292	0.308619	238.15	13.8706
				1426	13.8799	0.307101	237.85	13.8706
				1427	13.9722	0.262234	237.85	13.5883
				1428	13.8281	0.607835	ErrBox	ErrBox
				1429	13.9298	0.182546	238.85	13.538
				1430	13.861	0.219642	239.15	13.538
				1431	13.9202	0.0496635	239.15	13.8911
				1432	13.9776	0.173291	238.85	13.8911
				1433	14.0394	0.118269	238.85	13.538
				1434	13.8572	0.155837	ErrBox	ErrBox
				1435	13.8865	0.152498	239.85	13.4868
				1436	13.9743	0.120945	240.15	13.4868
				1437	13.9109	0.422588	240.15	14.1414
				1438	13.8588	0.199875	239.85	14.1414
				1439	13.9821	0.298069	239.85	13.4868
				1440	14.0277	0.122462	ErrBox	ErrBox
				1441	13.9244	0.258062	240.85	13.7352
				1442	13.843	0.146264	241.15	13.7352
				1443	13.8756	0.143217	241.15	13.9265
				1444	14.0398	0.282909	240.85	13.9265
				1445	13.8408	0.0842355	240.85	13.7352
				1446	13.9227	0.252924	ErrBox	ErrBox
				1447	13.8524	0.131417	241.85	13.6906
				1448	13.8716	0.134391	242.15	13.6906
				1449	13.923	0.125309	242.15	13.9246
				1450	14.0583	0.3596	241.85	13.9246
				1451	14.0664	0.0651815	241.85	13.6906
				1452	13.7505	0.0770184	ErrBox	ErrBox
				1453	13.6165	0.35834	242.85	13.6848
				1454	13.7668	0.10453	243.15	13.6848
				1455	13.7364	0.251299	243.15	13.9012
				1456	13.6561	0.223059	242.85	13.9012
				1457	13.7469	0.0995862	242.85	13.6848
				1458	13.7438	0.173274	ErrBox	ErrBox
				1459	13.6509	0.20278	243.85	13.5574
				1460	13.7461	0.176257	244.15	13.5574
				1461	13.6256	0.339284	244.15	14.1441
				1462	13.7531	0.296599	243.85	14.1441
				1463	13.7671	0.0753348	243.85	13.5574
				1464	13.6235	0.164324	ErrBox	ErrBox
				1465	13.7452	0.113602	244.85	13.3078
				1466	13.6511	0.14368	245.15	13.3078
				1467	13.7655	0.118835	245.15	14.4212
				1468	13.7239	0.340269	244.85	14.4212
				1469	13.7115	0.381294	244.85	13.3078
				1470	13.779	0.352598	ErrBox	ErrBox
				1471	13.6896	0.295828	245.85	13.4127
				1472	13.7668	0.457033	246.15	13.4127
				1473	13.7668	0.368708	246.15	13.9341
				1474	13.7922	0.223817	245.85	13.9341
				1475	13.669	0.198048	245.85	13.4127
				1476	13.6295	0.233483	ErrBox	ErrBox
				1477	13.6783	0.185207	246.85	13.4525
				1478	13.691	0.52814	247.15	13.4525
				1479	13.6299	0.560545	247.15	13.9469
				1480	13.6877	0.226255	246.85	13.9469
				1481	13.7928	0.311921	246.85	13.4525
				1482	13.7055	0.170636	ErrBox	ErrBox
				1483	13.7401	0.415255	247.85	12.97
				1484	13.6708	0.164023	248.15	12.97
				1485	13.638	0.379984	248.15	14.1139
				1486	13.79	0.234778	247.85	14.1139
				1487	13.8342	0.0691309	247.85	12.97
				1488	13.8112	0.267364	ErrBox	ErrBox
				1489	13.8095	0.349135	248.85	13.5363
				1490	13.7648	0.0743614	249.15	13.5363
				1491	13.8527	0.0753194	249.15	13.7089
				1492	13.7994	0.224656	248.85	13.7089
				1493	13.865	0.258167	248.85	13.5363
				1494	13.8767	0.146949	ErrBox	ErrBox
				1495	13.8175	0.0990402	249.85	13.4912
				1496	13.8159	0.193695	250.15	13.4912
				1497	13.8417	0.0906792	250.15	13.7521
				1498	13.7028	0.22903	249.85	13.7521
				1499	13.7549	0.172727	249.85	13.4912
				1500	13.6239	0.139221	ErrBox	ErrBox
				1501	13.6758	0.17226	250.85	13.3578
				1502	13.7433	0.150967	251.15	13.3578
				1503	13.7325	0.388735	251.15	13.947
				1504	13.6345	0.261975	250.85	13.947
				1505	13.6814	0.256337	250.85	13.3578
				1506	13.6837	0.327193	ErrBox	ErrBox
				1507	13.6378	0.13566	251.85	13.3973
				1508	13.653	0.16367	252.15	13.3973
				1509	13.6619	0.114155	252.15	13.8856
				1510	13.7203	0.324088	251.85	13.8856
				1511	13.7264	0.356571	251.85	13.3973
				1512	13.7593	0.163355	ErrBox	ErrBox
				1513	13.6698	0.195865	252.85	13.3161
				1514	13.6383	0.152318	253.15	13.3161
				1515	13.7137	0.307005	253.15	14.0698
				1516	13.7425	0.163563	252.85	14.0698
				1517	13.6763	0.14053	252.85	13.3161
				1518	13.7355	0.284734	ErrBox	ErrBox
				1519	13.6017	0.290474	253.85	13.3038
				1520	13.6268	0.157977	254.15	13.3038
				1521	13.6139	0.123103	254.15	14.0288
				1522	13.609	0.104121	253.85	14.0288
				1523	13.5916	0.0794545	253.85	13.3038
				1524	13.6306	0.108443	ErrBox	ErrBox
				1525	13.649	0.12233	254.85	13.2111
				1526	13.6126	0.0864008	255.15	13.2111
				1527	13.5961	0.107762	255.15	14.2943
				1528	13.5889	0.261209	254.85	14.2943
				1529	13.5698	0.153724	254.85	13.2111
				1530	13.6206	0.112079	ErrBox	ErrBox
				1531	13.5721	0.182194	255.85	13.3991
				1532	13.5521	0.119824	256.15	13.3991
				1533	13.5917	0.143766	256.15	13.9702
				1534	13.5433	0.10808	255.85	13.9702
				1535	13.5527	0.0875242	255.85	13.3991
				1536	13.5575	0.0810363	ErrBox	ErrBox
				1537	13.5752	0.14565	256.85	13.1887
				1538	13.6484	0.169557	257.15	13.1887
				1539	13.5804	0.0872972	257.15	13.9247
				1540	13.5877	0.0995382	256.85	13.9247
				1541	13.578	0.135423	256.85	13.1887
				1542	13.5597	0.0860091	ErrBox	ErrBox
				1543	13.6374	0.109765	257.85	13.3458
				1544	13.6366	0.150803	258.15	13.3458
				1545	13.6409	0.443647	258.15	13.811
				1546	13.6141	0.108961	257.85	13.811
				1547	13.6161	0.367472	257.85	13.3458
				1548	13.5128	0.0654769	ErrBox	ErrBox
				1549	13.6113	0.0905496	258.85	13.347
				1550	13.5705	0.0810061	259.15	13.347
				1551	13.6407	0.123751	259.15	14.1206
				1552	13.6191	0.101739	258.85	14.1206
				1553	13.6112	0.140345	258.85	13.347
				1554	13.735	0.174101	ErrBox	ErrBox
				1555	13.6565	0.0989916	259.85	13.3163
				1556	13.5616	0.0889569	260.15	13.3163
				1557	13.6193	0.0916846	260.15	13.9608
				1558	13.6004	0.078828	259.85	13.9608
				1559	13.6266	0.243022	259.85	13.3163
				1560	13.6309	0.0776511	ErrBox	ErrBox
				1561	13.6726	0.196627	260.85	13.4644
				1562	13.7312	0.120715	261.15	13.4644
				1563	13.6998	0.118746	261.15	14.0154
				1564	13.7203	0.0859084	260.85	14.0154
				1565	13.6204	0.241276	260.85	13.4644
				1566	13.6568	0.107646	ErrBox	ErrBox
				1567	13.7228	0.0822474	261.85	13.4189
				1568	13.6698	0.536439	262.15	13.4189
				1569	13.6188	0.422853	262.15	13.8798
				1570	13.8196	0.397178	261.85	13.8798
				1571	13.7489	0.360112	261.85	13.4189
				1572	13.724	0.3635	ErrBox	ErrBox
				1573	13.7714	0.236627	262.85	13.3638
				1574	13.7936	0.431102	263.15	13.3638
				1575	13.9101	0.492303	263.15	13.8692
				1576	13.7291	0.570936	262.85	13.8692
				1577	13.6943	0.243099	262.85	13.3638
				1578	13.8834	0.349882	ErrBox	ErrBox
				1579	13.711	0.288109	263.85	13.5055
				1580	13.6395	0.438112	264.15	13.5055
				1581	13.8243	0.255961	264.15	13.8594
				1582	13.796	0.523569	263.85	13.8594
				1583	13.7754	0.218596	263.85	13.5055
				1584	13.6526	0.381349	ErrBox	ErrBox
				1585	13.8122	0.447589	264.85	13.1494
				1586	13.7763	0.554434	265.15	13.1494
				1587	13.7544	0.507818	265.15	14.0174
				1588	13.789	0.451462	264.85	14.0174
				1589	13.7028	0.47305	264.85	13.1494
				1590	13.6921	0.25393	ErrBox	ErrBox
				1591	13.6316	0.440891	265.85	13.6501
				1592	13.895	0.244443	266.15	13.6501
				1593	13.8678	0.562276	266.15	14.2456
				1594	13.7665	0.44511	265.85	14.2456
				1595	13.8417	0.59186	265.85	13.6501
				1596	13.739	0.317722	ErrBox	ErrBox
				1597	13.7994	0.393023	266.85	13.3984
				1598	13.7139	0.358296	267.15	13.3984
				1599	13.8351	0.256399	267.15	14.6313
				1600	13.8666	0.350793	266.85	14.6313
				1601	13.8197	0.376103	266.85	13.3984
				1602	13.8107	0.245484	ErrBox	ErrBox
				1603	13.7642	0.326076	267.85	13.5963
				1604	13.8399	0.373813	268.15	13.5963
				1605	13.8746	0.335914	268.15	14.4
				1606	13.6872	0.291118	267.85	14.4
				1607	13.7058	0.274821	267.85	13.5963
				1608	13.6792	0.14187	ErrBox	ErrBox
				1609	13.6584	0.0935608	268.85	13.4556
				1610	13.7983	0.0651384	269.15	13.4556
				1611	13.6742	0.0876224	269.15	14.5037
				1612	13.7368	0.218599	268.85	14.5037
				1613	13.7578	0.335199	268.85	13.4556
				1614	13.7929	0.111591	ErrBox	ErrBox
				1615	13.8023	0.100062	269.85	13.398
				1616	13.729	0.185632	270.15	13.398
				1617	13.6233	0.215787	270.15	14.5817
				1618	13.7474	0.185265	269.85	14.5817
				1619	13.6178	0.152962	269.85	13.398
				1620	13.8967	0.116179	ErrBox	ErrBox
				1621	13.8807	0.11762	270.85	13.4895
				1622	13.9621	0.198873	271.15	13.4895
				1623	13.9335	0.165576	271.15	14.4318
				1624	13.8871	0.142606	270.85	14.4318
				1625	13.8547	0.147563	270.85	13.4895
				1626	13.9108	0.130734	ErrBox	ErrBox
				1627	13.9332	0.268242	271.85	13.4837
				1628	13.8786	0.218286	272.15	13.4837
				1629	13.9569	0.21137	272.15	14.4894
				1630	13.9708	0.197899	271.85	14.4894
				1631	13.9104	0.280533	271.85	13.4837
				1632	13.9329	0.159589	ErrBox	ErrBox
				1633	13.9216	0.143038	272.85	13.3869
				1634	13.8534	0.089985	273.15	13.3869
				1635	13.9168	0.141931	273.15	14.6515
				1636	13.979	0.200347	272.85	14.6515
				1637	13.8977	0.150066	272.85	13.3869
				1638	13.9137	0.13629	ErrBox	ErrBox
				1639	13.9075	0.170884	273.85	13.5013
				1640	13.8524	0.129421	274.15	13.5013
				1641	13.9689	0.195335	274.15	14.4981
				1642	13.952	0.231368	273.85	14.4981
				1643	13.9624	0.164075	273.85	13.5013
				1644	13.9418	0.167349	ErrBox	ErrBox
				1645	13.7577	0.428337	274.85	13.4578
				1646	13.7416	0.505859	275.15	13.4578
				1647	13.7999	0.423367	275.15	14.5089
				1648	13.7788	0.469479	274.85	14.5089
				1649	13.7698	0.782057	274.85	13.4578
				1650	13.7297	0.45847	ErrBox	ErrBox
				1651	13.7659	0.472814	275.85	13.5767
				1652	13.7736	0.341528	276.15	13.5767
				1653	13.8004	0.610295	276.15	14.3481
				1654	13.7811	0.427853	275.85	14.3481
				1655	13.7563	0.349986	275.85	13.5767
				1656	13.7642	0.422289	ErrBox	ErrBox
				1657	13.7513	0.387142	276.85	13.5487
				1658	13.7475	0.387321	277.15	13.5487
				1659	13.7338	0.452837	277.15	14.4142
				1660	13.7847	0.464468	276.85	14.4142
				1661	13.7628	0.38997	276.85	13.5487
				1662	13.78	0.541258	ErrBox	ErrBox
				1663	13.758	0.32343	277.85	13.5142
				1664	13.7508	0.0895086	278.15	13.5142
				1665	13.681	0.137266	278.15	14.411
				1666	13.6386	0.240894	277.85	14.411
				1667	13.6595	0.135652	277.85	13.5142
				1668	13.6884	0.1216	ErrBox	ErrBox
				1669	13.6866	0.208052	278.85	13.5243
				1670	13.7439	0.165126	279.15	13.5243
				1671	13.7221	0.304261	279.15	14.4188
				1672	13.6998	0.107447	278.85	14.4188
				1673	13.7259	0.127816	278.85	13.5243
				1674	13.6492	0.300034	ErrBox	ErrBox
				1675	13.6958	0.331573	279.85	13.4909
				1676	13.7081	0.267271	280.15	13.4909
				1677	13.7478	0.192862	280.15	14.4588
				1678	13.6311	0.125871	279.85	14.4588
				1679	13.6581	0.102022	279.85	13.4909
				1680	13.7841	0.438583	ErrBox	ErrBox
				1681	13.7508	0.152836	280.85	13.5538
				1682	13.7439	0.155709	281.15	13.5538
				1683	13.7641	0.169711	281.15	14.4244
				1684	13.7695	0.14926	280.85	14.4244
				1685	13.738	0.135414	280.85	13.5538
				1686	13.7298	0.16173	ErrBox	ErrBox
				1687	13.6738	0.214722	281.85	13.4726
				1688	13.7487	0.195903	282.15	13.4726
				1689	13.7566	0.177536	282.15	14.5156
				1690	13.7038	0.256226	281.85	14.5156
				1691	13.7669	0.166937	281.85	13.4726
				1692	13.7267	0.13907	ErrBox	ErrBox
				1693	13.7734	0.160257	282.85	13.5029
				1694	13.7711	0.496985	283.15	13.5029
				1695	13.6623	0.100089	283.15	14.5173
				1696	13.6789	0.154964	282.85	14.5173
				1697	13.7082	0.106595	282.85	13.5029
				1698	13.7261	0.143675	ErrBox	ErrBox
				1699	13.6038	0.136922	283.85	13.4576
				1700	13.614	0.104	284.15	13.4576
				1701	13.6915	0.0852482	284.15	14.5361
				1702	13.7087	0.0936907	283.85	14.5361
				1703	13.6065	0.0862959	283.85	13.4576
				1704	13.7121	0.176848	ErrBox	ErrBox
				1705	13.6067	0.0873192	284.85	13.4826
				1706	13.6508	0.122844	285.15	13.4826
				1707	13.6021	0.0902382	285.15	14.4844
				1708	13.5997	0.0958046	284.85	14.4844
				1709	13.648	0.0808564	284.85	13.4826
				1710	13.599	0.132948	ErrBox	ErrBox
				1711	13.6252	0.111176	285.85	13.5883
				1712	13.6457	0.165914	286.15	13.5883
				1713	13.6696	0.100573	286.15	14.4079
				1714	13.6818	0.069762	285.85	14.4079
				1715	13.6973	0.119372	285.85	13.5883
				1716	13.6315	0.180293	ErrBox	ErrBox
				1717	13.6478	0.111754	286.85	13.6067
				1718	13.7092	0.240982	287.15	13.6067
				1719	13.636	0.152753	287.15	14.3281
				1720	13.6991	0.322824	286.85	14.3281
				1721	13.6886	0.163391	286.85	13.6067
				1722	13.6712	0.255929	ErrBox	ErrBox
				1723	13.6285	0.108593	287.85	13.4545
				1724	13.6915	0.157712	288.15	13.4545
				1725	13.6117	0.255806	288.15	14.5269
				1726	13.6294	0.0890929	287.85	14.5269
				1727	13.7034	0.137065	287.85	13.4545
				1728	13.6149	0.106931	ErrBox	ErrBox
				1729	13.6216	0.120067	288.85	13.5001
				1730	13.6559	0.118297	289.15	13.5001
				1731	13.6623	0.207764	289.15	14.4955
				1732	13.6458	0.138664	288.85	14.4955
				1733	13.6429	0.134436	288.85	13.5001
				1734	13.5372	0.124574	ErrBox	ErrBox
				1735	13.5413	0.264297	289.85	13.3954
				1736	13.5932	0.181434	290.15	13.3954
				1737	13.7167	0.363638	290.15	14.6437
				1738	13.6281	0.460576	289.85	14.6437
				1739	13.7199	0.653347	289.85	13.3954
				1740	13.6916	0.274696	ErrBox	ErrBox
				1741	13.5847	0.186097	290.85	13.5555
				1742	13.6261	0.17463	291.15	13.5555
				1743	13.5621	0.179224	291.15	14.4064
				1744	13.5743	0.239715	290.85	14.4064
				1745	13.6663	0.252806	290.85	13.5555
				1746	13.7089	0.426891	ErrBox	ErrBox
				1747	13.5563	0.2067	291.85	13.5152
				1748	13.6338	0.237552	292.15	13.5152
				1749	13.6831	0.261359	292.15	14.4765
				1750	13.54	0.195496	291.85	14.4765
				1751	13.6114	0.233365	291.85	13.5152
				1752	13.5823	0.235541	ErrBox	ErrBox
				1753	13.7244	0.290384	292.85	13.616
				1754	13.5564	0.169991	293.15	13.616
				1755	13.6614	0.189818	293.15	14.28
				1756	13.5813	0.256648	292.85	14.28
				1757	13.6361	0.448194	292.85	13.616
				1758	13.633	0.235065	ErrBox	ErrBox
				1759	13.5772	0.700873	293.85	13.5211
				1760	13.6577	0.486244	294.15	13.5211
				1761	13.5984	0.33233	294.15	14.4089
				1762	13.7065	0.189969	293.85	14.4089
				1763	13.5013	0.289426	293.85	13.5211
				1764	13.6466	0.196328	ErrBox	ErrBox
				1765	13.6209	0.152461	294.85	13.4994
				1766	13.6176	0.543087	295.15	13.4994
				1767	13.6637	0.52589	295.15	14.4924
				1768	13.6745	0.296955	294.85	14.4924
				1769	13.8206	0.18445	294.85	13.4994
				1770	13.8559	0.273564	ErrBox	ErrBox
				1771	13.7493	0.184042	295.85	13.3314
				1772	13.8595	0.186347	296.15	13.3314
				1773	13.7292	0.180893	296.15	14.6003
				1774	13.7349	0.163277	295.85	14.6003
				1775	13.7365	0.131118	295.85	13.3314
				1776	13.7429	0.168132	ErrBox	ErrBox
				1777	13.7689	0.422895	296.85	13.4879
				1778	13.8029	0.215274	297.15	13.4879
				1779	13.7949	0.252001	297.15	14.4853
				1780	13.8116	0.273516	296.85	14.4853
				1781	13.7528	0.152187	296.85	13.4879
				1782	13.7804	0.236124	ErrBox	ErrBox
				1783	13.7172	0.162862	297.85	13.4662
				1784	13.7916	0.253795	298.15	13.4662
				1785	13.8227	0.333316	298.15	14.5126
				1786	13.8029	0.190478	297.85	14.5126
				1787	13.6965	0.199921	297.85	13.4662
				1788	13.7505	0.187292	ErrBox	ErrBox
				1789	13.771	0.253664	298.85	13.6149
				1790	13.9003	0.165977	299.15	13.6149
				1791	13.7237	0.163796	299.15	14.4104
				1792	13.8679	0.292986	298.85	14.4104
				1793	13.7766	0.268854	298.85	13.6149
				1794	13.7031	0.253068	ErrBox	ErrBox
				1795	13.7654	0.231134	299.85	13.3917
				1796	13.782	0.221838	300.15	13.3917
				1797	13.7987	0.181724	300.15	14.2196
				1798	13.8819	0.401632	299.85	14.2196
				1799	13.7634	0.291809	299.85	13.3917
				1800	13.6705	0.257146	ErrBox	ErrBox
				1801	13.7668	0.274184	300.85	13.3486
				1802	13.6711	0.149369	301.15	13.3486
				1803	13.6884	0.151626	301.15	14.2289
				1804	13.777	0.240892	300.85	14.2289
				1805	13.743	0.160935	300.85	13.3486
				1806	13.7596	0.130975	ErrBox	ErrBox
				1807	13.7481	0.103586	301.85	13.3574
				1808	13.6835	0.598738	302.15	13.3574
				1809	13.678	0.47004	302.15	14.3191
				1810	13.6422	0.18752	301.85	14.3191
				1811	13.6364	0.11103	301.85	13.3574
				1812	13.6991	0.25995	ErrBox	ErrBox
				1813	13.7283	0.21788	302.85	13.3854
				1814	13.7206	0.193731	303.15	13.3854
				1815	13.698	0.287337	303.15	14.111
				1816	13.7221	0.230504	302.85	14.111
				1817	13.6765	0.341394	302.85	13.3854
				1818	13.5948	0.440721	ErrBox	ErrBox
				1819	13.6787	0.311796	303.85	13.3921
				1820	13.6565	0.215393	304.15	13.3921
				1821	13.6293	0.42575	304.15	14.1422
				1822	13.6767	0.254136	303.85	14.1422
				1823	13.7335	0.317962	303.85	13.3921
				1824	13.6266	0.331579	ErrBox	ErrBox
				1825	13.6245	0.387576	304.85	13.3175
				1826	13.6216	0.211075	305.15	13.3175
				1827	13.6962	0.230954	305.15	14.4209
				1828	13.8146	0.213539	304.85	14.4209
				1829	13.7546	0.0962354	304.85	13.3175
				1830	13.8983	0.208533	ErrBox	ErrBox
				1831	13.886	0.190177	305.85	13.1809
				1832	13.8028	0.135564	306.15	13.1809
				1833	13.8094	0.125797	306.15	14.3423
				1834	13.7749	0.162823	305.85	14.3423
				1835	13.7196	0.078342	305.85	13.1809
				1836	13.8434	0.176588	ErrBox	ErrBox
				1837	13.7029	0.0792965	306.85	13.3823
				1838	13.8542	0.109788	307.15	13.3823
				1839	13.7534	0.163682	307.15	14.1342
				1840	13.9116	0.463193	306.85	14.1342
				1841	13.7812	0.134025	306.85	13.3823
				1842	13.7722	0.165098	ErrBox	ErrBox
				1843	13.732	0.100868	307.85	13.219
				1844	13.8153	0.112295	308.15	13.219
				1845	13.849	0.0988163	308.15	14.3229
				1846	13.9143	0.137795	307.85	14.3229
				1847	13.8253	0.141491	307.85	13.219
				1848	13.8445	0.179961	ErrBox	ErrBox
				1849	13.7829	0.112057	308.85	12.733
				1850	13.8476	0.278631	309.15	12.733
				1851	13.7686	0.123224	309.15	14.8209
				1852	13.7975	0.12756	308.85	14.8209
				1853	13.7432	0.0875918	308.85	12.733
				1854	13.8068	0.114819	ErrBox	ErrBox
				1855	13.7643	0.143716	309.85	13.1169
				1856	13.8684	0.120171	310.15	13.1169
				1857	13.5851	0.184596	310.15	14.4948
				1858	13.5716	0.120909	309.85	14.4948
				1859	13.5907	0.0621478	309.85	13.1169
				1860	13.6174	0.166131	ErrBox	ErrBox
				1861	13.552	0.149241	310.85	13.4414
				1862	13.5915	0.141952	311.15	13.4414
				1863	13.5764	0.159047	311.15	14.2138
				1864	13.4791	0.152088	310.85	14.2138
				1865	13.5232	0.158928	310.85	13.4414
				1866	13.571	0.080681	ErrBox	ErrBox
				1867	13.6029	0.161953	311.85	13.2382
				1868	13.5962	0.11098	312.15	13.2382
				1869	13.5811	0.0692395	312.15	14.3415
				1870	13.6606	0.160394	311.85	14.3415
				1871	13.5939	0.0597101	311.85	13.2382
				1872	13.6096	0.156659	ErrBox	ErrBox
				1873	13.6316	0.120796	312.85	13.3089
				1874	13.5587	0.077688	313.15	13.3089
				1875	13.542	0.239791	313.15	14.3677
				1876	13.6052	0.218832	312.85	14.3677
				1877	13.5933	0.249469	312.85	13.3089
				1878	13.5515	0.333847	ErrBox	ErrBox
				1879	13.6582	0.17671	313.85	13.0739
				1880	13.6144	0.0790926	314.15	13.0739
				1881	13.6165	0.0937664	314.15	14.6808
				1882	13.6122	0.15926	313.85	14.6808
				1883	13.6258	0.0830001	313.85	13.0739
				1884	13.6303	0.0898987	ErrBox	ErrBox
				1885	13.6109	0.0964801	314.85	13.2508
				1886	13.6141	0.169106	315.15	13.2508
				1887	13.6651	0.19074	315.15	14.2903
				1888	13.6066	0.166008	314.85	14.2903
				1889	13.6301	0.0892303	314.85	13.2508
				1890	13.6169	0.11059	ErrBox	ErrBox
				1891	13.6193	0.402252	315.85	13.1322
				1892	13.6214	0.385495	316.15	13.1322
				1893	13.6247	0.112459	316.15	14.4645
				1894	13.6031	0.0653279	315.85	14.4645
				1895	13.6168	0.121749	315.85	13.1322
				1896	13.6076	0.188962	ErrBox	ErrBox
				1897	13.5786	0.0670908	316.85	13.2982
				1898	13.6222	0.0945137	317.15	13.2982
				1899	13.7431	0.195593	317.15	14.2068
				1900	13.7364	0.311836	316.85	14.2068
				1901	13.8273	0.188176	316.85	13.2982
				1902	13.8225	0.156204	ErrBox	ErrBox
				1903	13.728	0.223705	317.85	13.3901
				1904	13.7335	0.18456	318.15	13.3901
				1905	13.8676	0.230507	318.15	14.1216
				1906	13.7927	0.322552	317.85	14.1216
				1907	13.8359	0.48937	317.85	13.3901
				1908	13.6634	0.383392	ErrBox	ErrBox
				1909	13.7601	0.290635	318.85	13.363
				1910	13.7133	0.266818	319.15	13.363
				1911	13.6522	0.754427	319.15	14.1987
				1912	13.7022	0.182467	318.85	14.1987
				1913	13.8216	0.250184	318.85	13.363
				1914	13.7551	0.262062	ErrBox	ErrBox
				1915	13.7841	0.1705	319.85	13.0461
				1916	13.6311	0.161606	320.15	13.0461
				1917	13.7088	0.224637	320.15	14.605
				1918	13.7205	0.231976	319.85	14.605
				1919	13.7038	0.238057	319.85	13.0461
				1920	13.7261	0.196666	ErrBox	ErrBox
				1921	13.7084	0.154776	320.85	13.2309
				1922	13.6379	0.301239	321.15	13.2309
				1923	13.6935	0.139717	321.15	14.4349
				1924	13.6826	0.253517	320.85	14.4349
				1925	13.687	0.323098	320.85	13.2309
				1926	13.796	0.215082	ErrBox	ErrBox
				1927	13.8266	0.316873	321.85	13.0773
				1928	13.8061	0.495658	322.15	13.0773
				1929	13.8422	0.210382	322.15	14.6499
				1930	13.6824	0.418361	321.85	14.6499
				1931	13.8297	0.336279	321.85	13.0773
				1932	13.6997	0.208433	ErrBox	ErrBox
				1933	13.7995	0.176205	322.85	13.3399
				1934	13.7632	0.131598	323.15	13.3399
				1935	13.711	0.137614	323.15	14.1768
				1936	13.7887	0.15357	322.85	14.1768
				1937	13.7839	0.502946	322.85	13.3399
				1938	13.781	0.122856	ErrBox	ErrBox
				1939	13.9394	0.210851	323.85	13.2993
				1940	13.8437	0.183033	324.15	13.2993
				1941	14.0308	0.202947	324.15	14.2247
				1942	13.9952	0.194516	323.85	14.2247
				1943	13.8076	0.145282	323.85	13.2993
				1944	13.9852	0.298453	ErrBox	ErrBox
				1945	13.9204	0.393395	324.85	13.1995
				1946	14.0014	0.277767	325.15	13.1995
				1947	13.9548	0.1728	325.15	14.3766
				1948	14.0429	0.190927	324.85	14.3766
				1949	13.9844	0.327013	324.85	13.1995
				1950	13.8874	0.150481	ErrBox	ErrBox
				1951	13.8253	0.138749	325.85	13.228
				1952	13.9648	0.460039	326.15	13.228
				1953	13.8345	0.181067	326.15	14.4122
				1954	13.9871	0.253614	325.85	14.4122
				1955	13.8436	0.129598	325.85	13.228
				1956	13.8632	0.199407	ErrBox	ErrBox
				1957	13.9146	0.160358	326.85	13.2851
				1958	14.0146	0.169183	327.15	13.2851
				1959	13.9268	0.173821	327.15	14.3234
				1960	13.9359	0.259361	326.85	14.3234
				1961	13.982	0.304229	326.85	13.2851
				1962	13.9465	0.161183	ErrBox	ErrBox
				1963	14.0338	0.925914	327.85	13.2793
				1964	14.0286	0.19053	328.15	13.2793
				1965	13.8696	0.181474	328.15	14.3465
				1966	14.0231	0.268303	327.85	14.3465
				1967	13.9834	0.268322	327.85	13.2793
				1968	13.9028	0.617445	ErrBox	ErrBox
				1969	13.3374	0.640565	328.85	13.3021
				1970	13.3745	0.442399	329.15	13.3021
				1971	13.2974	0.458901	329.15	14.278
				1972	13.3192	0.891426	328.85	14.278
				1973	13.294	0.581851	328.85	13.3021
				1974	13.3414	0.629771	ErrBox	ErrBox
				1975	13.3474	0.512066	329.85	13.2714
				1976	13.3123	0.56392	330.15	13.2714
				1977	13.3714	0.459857	330.15	14.2693
				1978	13.3318	0.583828	329.85	14.2693
				1979	13.4134	0.690589	329.85	13.2714
				1980	13.3262	0.624986	ErrBox	ErrBox
				1981	13.3453	0.659642	330.85	13.2087
				1982	13.3638	0.511689	331.15	13.2087
				1983	13.4126	0.36489	331.15	14.3483
				1984	13.363	0.507693	330.85	14.3483
				1985	13.3843	0.483112	330.85	13.2087
				1986	13.4022	0.522529	ErrBox	ErrBox
				1987	13.381	0.412713	331.85	13.188
				1988	13.3511	0.54058	332.15	13.188
				1989	13.3361	0.680338	332.15	14.3685
				1990	13.3441	0.390495	331.85	14.3685
				1991	13.3724	1.0611	331.85	13.188
				1992	13.325	0.486979	ErrBox	ErrBox
				1993	13.3227	0.538199	332.85	13.3179
				1994	13.3852	0.467903	333.15	13.3179
				1995	13.3222	0.762932	333.15	14.3204
				1996	13.3652	0.474746	332.85	14.3204
				1997	13.3832	0.0625683	332.85	13.3179
				1998	13.3955	0.0947618	ErrBox	ErrBox
				1999	13.3835	0.117375	333.85	13.3187
				2000	13.3776	0.0708614	334.15	13.3187
[truncated: 21,970 more rows]

## Sheet: Dataset S3 - Individual
Dataset S3. Individual Pb isotope analyeses from K-feldspar from granites of the Yilgarn Craton, Western Australia.
SampleID	Spot	206Pb/204Pb	2S.E	207Pb/204Pb	2S.E	208Pb/204Pb	2S.E	208Pb/206Pb	2S.E	207Pb/206Pb	2S.E	Pb Conc. (ppm)	2S.E	204Hg/204Total	2S.E
185929	1	13.8399	0.0465739	14.9187	0.0522029	33.6057	0.122434	2.42817	0.00338199	1.07795	0.00139081	68.8607	1.44156	0.0215953	0.000485533
185929	2	13.7063	0.0565309	14.8445	0.0534762	33.457	0.115119	2.44101	0.00214716	1.08305	0.000966733	60.6952	1.48027	0.0207159	0.00112411
185929	3	13.696	0.0348169	14.8983	0.0377828	33.6046	0.0779082	2.45361	0.0019311	1.08779	0.000994639	65.7009	1.11849	0.019973	0.000710375
185929	4	13.7735	0.0463314	14.9446	0.0521572	33.7159	0.106511	2.44789	0.00204567	1.08503	0.000902869	58.686	3.77535	0.0249718	0.0022075
185929	5	13.7799	0.0238462	14.8377	0.0676283	33.4518	0.132832	2.42758	0.0110661	1.07677	0.00615275	21.3811	0.718062	0.0596331	0.00347008
185929	6	13.7072	0.0992241	14.8518	0.115942	33.4859	0.208111	2.44298	0.00831224	1.08351	0.00548857	20.7141	0.484801	0.0687034	0.00324954
185929	7	13.7608	0.100812	14.8735	0.100317	33.5747	0.252133	2.43988	0.00432217	1.08088	0.00395418	23.0947	1.63833	0.0628959	0.00587138
185929	8	13.6619	0.0487765	14.8595	0.0548764	33.5225	0.109376	2.45373	0.00312565	1.08766	0.00210096	53.4894	0.624406	0.0246456	0.00115812
185929	9	13.7212	0.082024	14.9115	0.0901271	33.6176	0.197684	2.45006	0.00101244	1.08675	0.000638888	167.32	6.24611	0.00914142	0.000365427
185929	10	13.7419	0.0716077	14.9348	0.0984339	33.6783	0.155016	2.45079	0.00611006	1.08682	0.00582565	31.2675	2.40413	0.046318	0.00516053
185929	11	13.7217	0.0730474	14.8384	0.0870091	33.4611	0.214183	2.43855	0.00610057	1.08138	0.00198051	22.2278	1.07163	0.0645957	0.00525931
185929	12	13.7826	0.0476077	14.8924	0.0426459	33.5601	0.0977767	2.43499	0.00262733	1.08054	0.00114649	124.193	3.92299	0.0119135	0.000347653
185929	13	13.7525	0.0441603	14.905	0.0485678	33.5972	0.10846	2.44299	0.0019397	1.0838	0.000787209	103.189	6.43208	0.0150664	0.00141214
185929	14	13.752	0.102686	14.9398	0.105532	33.6905	0.243146	2.44989	0.00324157	1.08639	0.00172561	47.2576	7.38356	0.0333164	0.00494262
185929	15	13.7429	0.0609982	14.9158	0.0717551	33.6323	0.159027	2.44724	0.00215489	1.08534	0.00151472	62.0937	4.25821	0.0231354	0.00233976
185929	16	13.7272	0.0764961	14.9276	0.086393	33.6381	0.192681	2.45046	0.00227177	1.08744	0.00114742	70.5998	9.33506	0.0237771	0.00310258
185929	17	13.7183	0.11089	14.8512	0.100579	33.4827	0.240201	2.44075	0.00235681	1.0826	0.00220966	55.0269	0.171623	0.0238331	0.000829179
185929	18	13.7967	0.0542224	14.9629	0.0489908	33.7315	0.10992	2.44636	0.003331	1.08455	0.00179385	64.138	5.44439	0.0223965	0.00254749
185929	19	13.7968	0.0610592	14.9294	0.0535401	33.6536	0.11217	2.43932	0.00373868	1.08277	0.00129239	49.6897	5.74501	0.0325098	0.0046508
185929	20	13.7872	0.0788799	14.8885	0.0995923	33.5306	0.217329	2.43201	0.00236458	1.07987	0.00122411	91.1375	1.00522	0.0156627	0.000335993
185929	21	13.721	0.0505396	14.8895	0.0516482	33.5663	0.12136	2.44635	0.00167298	1.08517	0.000921564	76.576	4.701	0.0179996	0.00138347
185929	22	13.677	0.0484277	14.875	0.0455901	33.5365	0.115201	2.45203	0.00125847	1.08759	0.000953698	119.215	4.28172	0.0115252	0.000477743
185929	23	13.8093	0.128986	14.934	0.125275	33.675	0.269317	2.43867	0.00854855	1.08148	0.00376765	94.4486	2.43715	0.0127795	0.000947038
185929	24	13.68	0.0157188	14.8726	0.0165847	33.5463	0.039058	2.45221	0.00120205	1.08718	0.000679733	104.388	3.97731	0.0119472	0.000716636
168902	1	13.9181	0.0751165	15.0611	0.0722269	34.0176	0.164971	2.44415	0.0047529	1.08214	0.00289797	45.5541	2.27398	0.041021	0.00280666
168902	2	14.0124	0.119697	15.1102	0.186629	34.0385	0.36374	2.42916	0.00551029	1.07833	0.00446044	71.0568	0.869801	0.0184541	0.00178879
168902	3	13.8759	0.212806	15.0109	0.171269	33.8886	0.40845	2.44242	0.00961692	1.08188	0.00446382	50.5698	1.92082	0.0274132	0.00272545
168902	4	13.8152	0.137662	15.0044	0.173185	33.8446	0.316201	2.44983	0.0041984	1.08606	0.00315225	46.6635	3.26045	0.0376866	0.00556797
168902	5	13.9176	0.217819	15.0033	0.17409	33.9573	0.405887	2.44014	0.014793	1.07813	0.00636483	57.4635	5.51075	0.0313065	0.00221095
168902	6	13.9389	0.0688509	15.0821	0.0605312	33.964	0.186816	2.43663	0.00718001	1.08203	0.00300231	80.639	3.64794	0.0216172	0.00247582
168902	7	13.8981	0.206653	15.0306	0.1863	33.9137	0.401728	2.44029	0.014635	1.08154	0.00725737	57.8296	1.42171	0.0268986	0.00323712
168902	8	13.9289	0.124887	14.9923	0.243267	33.7084	0.111872	2.42006	0.0136667	1.07632	0.0078145	37.0919	1.11782	0.0433899	0.0040134
168902	9	13.8081	0.0175112	14.9838	0.025712	33.7232	0.0998378	2.44228	0.00881593	1.08514	0.00270542	92.4051	4.29941	0.025498	0.00162357
168902	10	13.9079	0.223279	15.0559	0.23755	33.9371	0.497367	2.4402	0.0103979	1.08255	0.00379844	59.2636	3.61652	0.0280241	0.00519516
168902	11	13.9026	0.155838	15.0531	0.162982	33.9134	0.346386	2.43943	0.00331744	1.08277	0.00164314	79.227	2.68175	0.0236463	0.00128574
168902	12	13.9212	0.0606207	15.0603	0.0506732	33.931	0.113963	2.43404	0.0017001	1.08033	0.000891577	135.528	7.65692	0.0150227	0.00143994
168902	13	13.8402	0.0721301	14.9818	0.0807682	33.8101	0.165217	2.44291	0.00748031	1.08249	0.00326576	57.8129	3.50522	0.0284357	0.00292891
168902	14	13.9944	0.0935526	15.0575	0.078156	33.927	0.161175	2.42437	0.00640298	1.076	0.00618365	72.793	3.28106	0.0220739	0.00245587
168902	15	13.9525	0.0922931	15.025	0.0877667	33.872	0.220526	2.42768	0.00861876	1.07689	0.00502606	77.1419	2.71359	0.0192995	0.00242127
168902	16	13.8906	0.0608423	14.9974	0.0874159	33.8934	0.177386	2.44002	0.00779695	1.07967	0.00300995	43.4664	1.98661	0.0511644	0.00291987
168902	17	13.9718	0.132441	15.0355	0.195392	33.9125	0.363803	2.42719	0.00708918	1.0761	0.0066939	53.2057	2.19379	0.0295552	0.00561852
168902	18	13.9144	0.0999913	15.0805	0.0822857	33.9918	0.215654	2.44295	0.00444427	1.08384	0.00314134	86.4723	6.19043	0.0182985	0.00230999
168902	19	13.8493	0.0575553	14.9444	0.061932	33.7501	0.158392	2.43695	0.0045753	1.07908	0.00244971	59.8956	0.767509	0.0292167	0.00133703
199047	1	13.7559	0.111048	14.8734	0.105219	33.4321	0.21594	2.43045	0.00561634	1.08125	0.0018142	41.6254	1.22335	0.0464749	0.00133859
199047	2	13.7368	0.0324664	14.8135	0.0297066	33.3455	0.0620209	2.42748	0.00288684	1.07839	0.00132828	71.204	4.30862	0.0255352	0.00159338
199047	3	13.7447	0.0389893	14.8222	0.026206	33.3722	0.0630383	2.42809	0.00432664	1.07844	0.0018562	47.4817	1.80083	0.0398954	0.00165422
199047	4	13.7036	0.0522384	14.8341	0.0524864	33.3846	0.117173	2.43622	0.0018499	1.08251	0.00110097	59.3719	2.66517	0.0297697	0.00160798
199047	5	13.7601	0.0576812	14.8682	0.0528612	33.4841	0.116409	2.43346	0.00357398	1.08055	0.00225611	41.0941	2.61856	0.04148	0.00279044
199047	6	13.7397	0.0264262	14.8566	0.0311256	33.4618	0.0646119	2.43543	0.00269224	1.0813	0.00160896	43.8282	2.60449	0.0424728	0.0024563
199047	7	13.7171	0.0325489	14.8365	0.0297713	33.4206	0.0663497	2.43837	0.00150394	1.08198	0.00105062	51.0696	2.55791	0.034647	0.00198011
199047	8	13.827	0.0586841	14.8676	0.051452	33.4941	0.128383	2.42239	0.00413336	1.07527	0.00172265	70.7478	2.94218	0.0236446	0.000968562
199047	9	13.7665	0.0556888	14.8909	0.0531925	33.5249	0.123319	2.43532	0.00393382	1.08285	0.00213713	33.2835	2.96113	0.0555007	0.00402808
199047	10	13.7733	0.0566043	14.863	0.0531889	33.4527	0.115508	2.43156	0.00217181	1.08033	0.00120423	52.4413	3.93908	0.0330589	0.00187489
199047	11	13.7955	0.195813	14.9219	0.191048	33.5905	0.47928	2.43489	0.00458521	1.08167	0.00213528	61.8387	3.88069	0.0261842	0.00202493
199047	12	13.7909	0.0350226	14.862	0.0411653	33.4575	0.0915382	2.42606	0.00238865	1.07767	0.00122988	55.2052	2.69083	0.0365674	0.00198139
199047	13	13.7708	0.0348844	14.8527	0.0505233	33.494	0.0913555	2.43275	0.00387709	1.07994	0.00190511	42.9041	2.44064	0.0443316	0.00288891
199047	14	13.6765	0.0245168	14.8016	0.0292666	33.3258	0.0534432	2.43626	0.00156088	1.08226	0.00100478	56.7265	2.08237	0.0294218	0.00104424
199047	15	13.8376	0.0800597	14.8766	0.116635	33.4778	0.141938	2.41937	0.00797237	1.0751	0.00915221	24.343	0.87932	0.0664367	0.00331847
199047	16	13.8318	0.0512354	14.8707	0.0455657	33.4547	0.0926427	2.41877	0.00643042	1.07514	0.00281046	37.6822	0.658677	0.0453079	0.000893535
199047	17	13.812	0.0579818	14.87	0.0567232	33.4887	0.1245	2.42464	0.00538616	1.07661	0.00240041	73.8205	3.81666	0.0199004	0.00182758
199047	18	13.7404	0.0416009	14.854	0.0442015	33.445	0.0968273	2.43409	0.00286193	1.08105	0.00134884	39.2658	2.96828	0.0483992	0.00350317
199047	19	13.7445	0.0419141	14.8573	0.0417713	33.4259	0.0923787	2.43198	0.00246382	1.08098	0.00120108	53.2006	3.36077	0.0324497	0.00201848
199047	20	13.7676	0.0442815	14.9019	0.0479347	33.5353	0.110157	2.43581	0.00214443	1.08239	0.00116794	52.9295	4.08098	0.0373528	0.00358102
199047	21	13.8232	0.0408008	14.9173	0.0295756	33.5861	0.0723891	2.43119	0.00387155	1.079	0.00242723	38.8298	3.01976	0.0483112	0.00493847
199047	22	13.7659	0.0346569	14.9034	0.030116	33.5402	0.0733082	2.4365	0.00262087	1.08265	0.00127342	49.4351	3.43557	0.0378983	0.0021311
199047	23	13.7397	0.0476662	14.8791	0.0461384	33.4835	0.106103	2.43701	0.00219009	1.08295	0.00131129	59.8122	3.64495	0.0314989	0.00241345
207630	1	13.513	0.0895601	14.6603	0.0959531	33.2254	0.205883	2.45895	0.00518715	1.08429	0.00285206	62.0815	3.12814	0.031346	0.00142474
207630	2	13.5413	0.209882	14.7029	0.281136	33.2788	0.566374	2.45754	0.0153473	1.08568	0.00840721	67.9197	6.13563	0.0271048	0.00211167
207630	3	13.5383	0.251465	14.65	0.210543	33.1643	0.477353	2.45024	0.0165009	1.08246	0.0115914	49.791	1.1811	0.0353973	0.00129198
207630	4	13.6519	0.0855041	14.7709	0.0889381	33.4266	0.207875	2.44854	0.00573413	1.082	0.0030259	93.0585	9.32208	0.0220801	0.00234372
207630	5	13.4642	0.204162	14.617	0.217169	33.1436	0.48796	2.46171	0.00441654	1.08567	0.00320113	121.192	5.14254	0.0135782	0.000878251
207630	6	13.4939	0.186419	14.6424	0.134068	33.1279	0.249382	2.45556	0.0261837	1.08535	0.0126913	61.7204	0.982611	0.0263025	0.0010537
207630	7	13.5279	0.18866	14.7062	0.147626	33.2766	0.393536	2.46004	0.015836	1.08721	0.00642946	92.8084	7.12616	0.020442	0.00114686
207630	8	13.5303	0.0909687	14.709	0.102125	33.3093	0.2146	2.46204	0.00763397	1.0872	0.00407477	53.221	4.72352	0.0335786	0.00251456
207630	9	13.6284	0.107979	14.6648	0.0982049	33.2094	0.20082	2.43751	0.0108451	1.07638	0.00597555	48.7155	2.4724	0.0362212	0.00187899
207630	10	13.5839	0.0991914	14.6771	0.0978125	33.2472	0.219533	2.44772	0.00533383	1.08056	0.0029589	102.423	10.4041	0.0225814	0.00179813
207630	11	13.5445	0.107869	14.6719	0.104149	33.2431	0.230497	2.45475	0.00709463	1.08343	0.00402075	54.6293	2.5568	0.0354306	0.0014055
207630	12	13.5369	0.0868341	14.6628	0.0907065	33.2427	0.200269	2.45597	0.00836892	1.08331	0.00445712	52.3414	2.20324	0.0370177	0.00153109
207630	13	13.6108	0.178087	14.7588	0.17145	33.3807	0.419708	2.45262	0.00996686	1.08444	0.00479111	70.373	1.60067	0.0267335	0.00155813
207630	14	13.5941	0.0722342	14.7608	0.0818376	33.3007	0.14886	2.45237	0.00576242	1.08588	0.0035513	60.529	2.37206	0.0289289	0.00125604
207630	15	13.5172	0.0580936	14.6871	0.0585638	33.2915	0.125028	2.4631	0.00693352	1.08667	0.00404316	53.5415	0.843441	0.0359448	0.00118945
207630	16	13.6425	0.0688956	14.7808	0.063234	33.5062	0.159929	2.45423	0.00833626	1.08358	0.00404798	42.6279	2.75602	0.0431269	0.00299001
207630	17	13.6829	0.100663	14.7298	0.0789805	33.423	0.165882	2.44312	0.0116967	1.07673	0.00617166	54.206	1.432	0.0346685	0.00138586
207630	18	13.7228	0.0858074	14.8386	0.0988566	33.6129	0.18028	2.4498	0.00846075	1.0801	0.00463705	49.1314	5.09579	0.0371222	0.00377046
207630	19	13.6985	0.268693	14.8186	0.28294	33.4903	0.601786	2.44506	0.0107989	1.08182	0.00498764	100.592	3.10908	0.0164388	0.000805099
207630	20	13.5895	0.111253	14.712	0.156709	33.4273	0.199606	2.46004	0.0147448	1.0826	0.00776734	62.6136	1.05668	0.0261306	0.00121358
207630	21	13.7108	0.0878935	14.885	0.0910705	33.6625	0.189245	2.4554	0.00808877	1.08574	0.00466607	48.7764	4.92494	0.0415499	0.00411158
207630	22	13.6128	0.216795	14.7114	0.173543	33.3768	0.32904	2.45244	0.0177265	1.08093	0.00900166	44.54	1.20327	0.0366489	0.00224779
207630	23	13.6647	0.121353	14.8184	0.16335	33.5318	0.321638	2.45395	0.013058	1.08448	0.0094254	66.0769	3.01215	0.0271228	0.00205688
207630	24	13.646	0.0890437	14.7653	0.110103	33.3413	0.230984	2.44329	0.00488887	1.08201	0.00305576	123.45	2.44167	0.0117492	0.000654246
207630	25	13.6556	0.0628014	14.7638	0.0839582	33.4429	0.166199	2.44905	0.00634618	1.08115	0.00338458	78.2681	0.752575	0.0182546	0.000859694
207630	26	13.5631	0.0929564	14.7387	0.120162	33.2029	0.212448	2.44815	0.0111049	1.08669	0.00555128	54.186	1.16954	0.0249776	0.0014196
205935	1	13.834	0.237602	14.8232	0.229069	33.4687	0.489747	2.41992	0.0149121	1.07181	0.00799286	47.8213	6.80928	0.0295505	0.0050723
205935	2	13.8079	0.206808	14.8394	0.204018	33.4726	0.483788	2.42414	0.00769322	1.0747	0.00415128	93.9195	38.9859	0.0186312	0.00612263
205935	3	13.845	0.234177	14.8737	0.228975	33.5608	0.490212	2.42406	0.0104909	1.07431	0.00646142	57.4709	1.97512	0.0194112	0.00245928
205935	4	13.7615	0.262349	14.8361	0.269897	33.474	0.610186	2.43245	0.0104503	1.0781	0.00467389	69.7824	4.1597	0.0199362	0.00185359
142994	1	13.686	0.154927	14.8523	0.135784	33.3677	0.307778	2.43837	0.0133788	1.08541	0.00891517	42.1078	0.769951	0.0382732	0.00126868
142994	2	13.6715	0.102087	14.8036	0.110732	33.4864	0.237729	2.44949	0.00440195	1.08285	0.00270491	79.2949	2.86316	0.0189703	0.000895116
142994	3	13.6829	0.180874	14.7695	0.193441	33.2983	0.439431	2.43361	0.00480346	1.07945	0.00344457	122.441	7.07218	0.0107549	0.00073155
142994	4	13.6283	0.105915	14.8061	0.0833231	33.3516	0.187557	2.44822	0.0144569	1.08668	0.00763619	34.5151	1.16025	0.0391154	0.00197202
142994	5	13.6689	0.0724985	14.8318	0.0743166	33.4229	0.165624	2.44489	0.00429604	1.08481	0.00256822	114.07	6.32004	0.0137847	0.000921471
142994	6	13.6657	0.139597	14.8102	0.15469	33.4303	0.343502	2.4463	0.00369701	1.08373	0.00194098	115.441	8.43031	0.0128489	0.000922664
142994	7	13.6606	0.211655	14.8516	0.332802	33.2796	0.645246	2.43607	0.0230973	1.08705	0.0125161	36.891	1.06283	0.0484633	0.00179778
142994	8	13.6459	0.060139	14.7979	0.0647861	33.3578	0.109408	2.44483	0.00825552	1.08453	0.00430524	49.794	0.369712	0.028301	0.00078279
142994	9	13.7101	0.0771655	14.8062	0.0950987	33.3975	0.200085	2.43598	0.00554133	1.07994	0.00324545	116.002	4.41187	0.0143696	0.000904753
142994	10	13.627	0.114515	14.7777	0.132907	33.3677	0.269873	2.44891	0.00839816	1.0835	0.00422233	64.6217	3.11903	0.023612	0.00110205
142994	11	13.6397	0.103073	14.8177	0.0819777	33.4013	0.177224	2.44969	0.0123885	1.08676	0.00590352	37.6894	0.701207	0.0372875	0.00144906
142994	12	13.633	0.0672132	14.7543	0.0657129	33.2785	0.146466	2.44119	0.006063	1.08236	0.00391358	76.3618	2.80006	0.0190145	0.000686206
142994	13	13.634	0.0872535	14.7816	0.0921959	33.3473	0.219142	2.4459	0.0038558	1.08422	0.00206481	136.862	6.97301	0.0102697	0.000709768
142994	14	13.6042	0.124139	14.7327	0.130692	33.2763	0.292757	2.4462	0.00556419	1.08304	0.00313692	87.5177	1.19171	0.016842	0.000585917
142994	15	13.6087	0.0783498	14.7496	0.0833077	33.2933	0.181117	2.44711	0.00301862	1.08418	0.00156691	139.599	6.19433	0.0117883	0.000530869
142994	16	13.6712	0.0959794	14.7603	0.0991795	33.2599	0.221501	2.43302	0.00575567	1.07914	0.00255435	85.7168	4.98165	0.0209477	0.00174079
142994	17	13.6333	0.0528515	14.7589	0.0576908	33.3148	0.124134	2.44371	0.00486716	1.08202	0.00234568	100.687	4.22999	0.0134594	0.000595124
193433	1	13.6147	0.0738359	14.7992	0.0795353	33.3779	0.182066	2.45162	0.0011088	1.08701	0.00064208	115.258	4.66361	0.0129523	0.000511637
193433	2	13.5307	0.0863883	14.71	0.0927683	33.2019	0.215072	2.45383	0.00283854	1.08717	0.00131929	87.5002	2.48829	0.0154958	0.000461279
193433	3	13.5794	0.0606705	14.7609	0.0653467	33.299	0.138749	2.45217	0.00217221	1.08678	0.000990848	58.4495	3.74628	0.0238288	0.0015367
193433	4	13.5584	0.0272534	14.7437	0.0350636	33.2643	0.0767404	2.45214	0.00167663	1.08691	0.000935247	75.6193	1.14026	0.0164447	0.000622204
193433	5	13.5871	0.0671846	14.7619	0.0718838	33.3064	0.162524	2.45131	0.00133965	1.08645	0.000706512	93.6333	3.46852	0.015194	0.000646629
193433	6	13.6332	0.0541438	14.7488	0.0553903	33.3693	0.131842	2.44777	0.00157699	1.08188	0.0010687	87.2082	3.65566	0.0159608	0.000910345
193433	7	13.5676	0.0507022	14.7462	0.0576991	33.2825	0.12762	2.45309	0.00247184	1.08687	0.00110673	46.5558	0.909227	0.0250735	0.000705197
193433	8	13.5627	0.0506346	14.7403	0.0555139	33.2569	0.124649	2.4521	0.00125531	1.08683	0.000745432	104.074	3.14143	0.013089	0.000505745
193433	9	13.532	0.0251565	14.6916	0.0255983	33.1652	0.0541443	2.45089	0.0017968	1.0857	0.00101996	65.3468	0.497029	0.0202669	0.000464323
193433	10	13.5481	0.0438109	14.7224	0.0448927	33.2162	0.103794	2.45173	0.00153353	1.08669	0.000881638	86.0735	0.983736	0.0154074	0.000282472
193433	11	13.4991	0.0301744	14.6726	0.0321327	33.1063	0.0704195	2.45234	0.00151714	1.08689	0.0008767	83.7049	1.75537	0.0152048	0.000545023
193433	12	13.5918	0.0620955	14.769	0.0663157	33.3357	0.150343	2.45265	0.00135004	1.08662	0.000803037	98.1131	6.42616	0.0145947	0.000992581
193433	13	13.5878	0.0656775	14.7646	0.0737197	33.3246	0.164912	2.45253	0.00133094	1.0866	0.000789098	90.3431	4.83441	0.0170372	0.00107141
193433	14	13.5125	0.0351463	14.6842	0.0385866	33.1294	0.0853619	2.45176	0.001622	1.08671	0.000861397	94.8928	1.66689	0.0146004	0.000420014
193433	15	13.6072	0.0688375	14.7292	0.0705475	33.3561	0.169174	2.45136	0.00148921	1.08248	0.00138195	83.8399	3.70212	0.0158889	0.000742781
193433	16	13.5547	0.0526563	14.7132	0.0567314	33.2373	0.128277	2.4521	0.00214293	1.08649	0.00114546	68.2888	2.2892	0.0207367	0.000703766
193433	17	13.6017	0.189038	14.7765	0.198446	33.363	0.457198	2.45289	0.00234445	1.0864	0.00149407	79.0702	2.03121	0.0179503	0.000716122
193433	18	13.5191	0.0209329	14.6893	0.023646	33.1409	0.0493992	2.45142	0.00151854	1.08656	0.000959304	90.6477	1.47962	0.0163208	0.000372394
193433	19	13.5885	0.0545388	14.7566	0.059155	33.3005	0.131966	2.45078	0.00166392	1.08605	0.000946106	98.587	4.46523	0.0161339	0.000814765
193433	20	13.5101	0.0318881	14.6581	0.0348449	33.1031	0.0767706	2.45029	0.00137838	1.085	0.000710131	105.665	0.763597	0.0124685	0.000199151
193433	21	13.5346	0.0441982	14.7128	0.0430214	33.2049	0.0951035	2.45121	0.00141455	1.08627	0.000730227	81.3209	2.0954	0.0172221	0.000575439
193433	22	13.6365	0.0537774	14.7197	0.0559098	33.5399	0.134126	2.45986	0.00115714	1.07945	0.00124654	114.502	2.51211	0.0113939	0.000411901
193433	23	13.5231	0.0364353	14.6701	0.0394157	33.1969	0.0883069	2.45485	0.00151439	1.08482	0.000711586	94.4629	1.75108	0.0126976	0.000462885
193433	24	13.5229	0.0519586	14.6902	0.0603772	33.1541	0.129736	2.45164	0.0018449	1.08634	0.00101694	84.1269	3.17996	0.0180602	0.000702396
193433	25	13.5582	0.0654288	14.7307	0.0692846	33.234	0.157154	2.45128	0.00122767	1.08641	0.000581026	119.799	5.71774	0.0122493	0.00068207
193433	26	13.5451	0.0614391	14.6925	0.0695193	33.2154	0.157393	2.45219	0.00175328	1.08471	0.00154577	74.2714	1.14504	0.0184216	0.000476838
193433	27	13.5595	0.0322147	14.7096	0.0356451	33.2527	0.0778903	2.45236	0.00136478	1.08482	0.000675648	86.2414	1.64652	0.0166006	0.000657565
193433	28	13.595	0.0695409	14.7631	0.0766723	33.3202	0.173603	2.4509	0.00110903	1.08592	0.000703331	105.362	4.53586	0.0146148	0.000622622
193433	29	13.4817	0.0294607	14.6509	0.0321573	33.068	0.069035	2.45282	0.00134798	1.08673	0.000757516	114.693	1.44177	0.0118442	0.000229692
193433	30	13.5425	0.0534009	14.7052	0.0567572	33.1838	0.129349	2.45035	0.00130445	1.08586	0.000705509	105.992	3.20381	0.0150332	0.00051659
193433	31	13.5342	0.0356916	14.7076	0.0391017	33.1778	0.0873052	2.45141	0.00127489	1.0867	0.000699345	103.897	4.84964	0.0145342	0.000663174
193433	32	13.5814	0.0673981	14.7571	0.0727017	33.2985	0.161848	2.4518	0.00136665	1.08658	0.000700808	106.929	5.40243	0.0137649	0.000642413
168970	1	13.7683	0.126842	14.922	0.13057	33.6151	0.223075	2.44179	0.0155653	1.08387	0.0062585	34.8873	0.283741	0.014137	0.00102081
168970	2	13.863	0.0912101	14.9264	0.0994868	33.6675	0.19869	2.42868	0.0106836	1.07678	0.0073366	42.1041	1.12834	0.0134492	0.000860008
168970	3	13.7956	0.108268	14.8549	0.109922	33.5707	0.208177	2.43358	0.00943659	1.07687	0.00688089	44.7005	0.626567	0.0124984	0.000665104
168970	4	13.8196	0.09438	14.92	0.103474	33.6324	0.230216	2.43239	0.00580208	1.07892	0.0033132	39.3206	1.54215	0.0154265	0.000813919
168970	5	13.8823	0.192677	14.9415	0.169332	33.8316	0.325652	2.43773	0.0210083	1.07663	0.0120922	19.581	0.29866	0.0266545	0.00192853
168970	6	13.8211	0.0933555	14.886	0.10189	33.5915	0.156233	2.43062	0.0142505	1.0771	0.00668914	62.3523	0.983134	0.00760398	0.00046173
168970	7	13.831	0.0774133	14.9687	0.0758292	33.6594	0.0958238	2.43383	0.012005	1.08231	0.00465028	39.5989	0.355559	0.0123491	0.000460366
168970	8	13.7555	0.0917152	14.8906	0.086321	33.5697	0.175103	2.44064	0.00972011	1.0826	0.00520593	40.5478	0.59077	0.0122352	0.000727739
168970	9	13.8395	0.0556613	14.9587	0.0535272	33.7037	0.114428	2.43547	0.00494534	1.08095	0.00282434	50.6342	1.8675	0.011323	0.000586194
168970	10	13.7593	0.105408	14.825	0.0943225	33.4522	0.161012	2.43153	0.0108711	1.07757	0.00602166	38.3596	0.3062	0.0131923	0.000549911
168970	11	13.9181	0.0574509	15.0307	0.0534514	33.8535	0.119513	2.43246	0.0042905	1.08	0.00229523	80.8587	2.61527	0.0072028	0.000399338
168970	12	13.8739	0.0900207	14.9957	0.091709	33.757	0.18725	2.43333	0.00735011	1.08092	0.00361356	41.735	2.54999	0.0134092	0.000992449
168970	13	13.7913	0.181627	14.8643	0.213226	33.5373	0.494104	2.43176	0.0155628	1.07787	0.0114683	26.8549	0.196168	0.0196616	0.00196255
168970	14	13.8934	0.12043	15.0168	0.122221	33.8972	0.252576	2.43997	0.011467	1.08092	0.00586251	51.478	1.51576	0.00952171	0.000802677
168970	15	13.8504	0.0337452	14.9506	0.0392643	33.674	0.0736357	2.43132	0.00373194	1.07945	0.0020577	59.312	1.44885	0.00937462	0.000390114
168970	16	13.8669	0.0463399	14.987	0.0509511	33.7477	0.0927578	2.43184	0.00459081	1.07994	0.00260921	61.1744	3.16522	0.00946522	0.000639003
168970	17	13.8301	0.123548	14.848	0.108269	33.616	0.223135	2.43141	0.0173339	1.07408	0.0105159	20.2769	2.24782	0.029177	0.00330179
168970	18	13.7788	0.12201	14.84	0.112715	33.537	0.241831	2.43423	0.0161483	1.07715	0.00803176	33.3661	0.193963	0.0166447	0.000560476
168970	19	13.7418	0.0533808	14.8072	0.0596104	33.3756	0.0994419	2.43099	0.00763079	1.07766	0.00476297	28.6621	0.703401	0.0201933	0.000620416
168970	20	13.7788	0.120536	14.8369	0.103688	33.4007	0.268467	2.42413	0.00725578	1.07686	0.0046934	51.0526	1.29913	0.0101057	0.000688764
168970	21	13.8581	0.116799	14.9724	0.105229	33.794	0.238235	2.43872	0.0129944	1.08048	0.00622001	50.0934	2.18925	0.0107158	0.000963924
168970	22	13.8418	0.0802	14.9195	0.11401	33.6662	0.237769	2.4323	0.0144432	1.07789	0.00688939	41.3486	0.442961	0.0126456	0.00061133
168970	23	13.8325	0.0434983	14.9378	0.052792	33.6761	0.104853	2.43464	0.00502748	1.08052	0.00243073	50.3887	0.835039	0.0107025	0.000453538
168970	24	13.8125	0.279	14.8903	0.18405	33.4607	0.485624	2.42334	0.0344434	1.07846	0.0153675	27.6161	0.51225	0.016893	0.000383426
168970	25	13.8842	0.0610274	14.9912	0.0621978	33.8116	0.142148	2.43532	0.00350287	1.07978	0.00207915	60.397	2.22829	0.00928472	0.000427441
168970	26	13.8369	0.120611	14.9549	0.150286	33.7507	0.34935	2.43923	0.0183097	1.08082	0.00706006	35.8128	0.973706	0.0145522	0.0011874
207529	1	13.709	0.0617683	14.8277	0.0638093	33.4292	0.16227	2.43848	0.004624	1.08161	0.00263415	33.1154	0.900164	0.0431011	0.000782368
207529	2	13.7641	0.124517	14.8594	0.194729	33.504	0.352939	2.43413	0.00611114	1.07954	0.00438992	28.9192	0.370439	0.0513942	0.00307753
207529	3	13.7372	0.0478802	14.8621	0.064638	33.5215	0.132085	2.44021	0.00810865	1.08189	0.0033525	29.534	0.384329	0.0503668	0.00297324
207529	4	13.7007	0.0544998	14.8085	0.0476912	33.4506	0.0940928	2.44156	0.0128555	1.08087	0.00430395	21.395	0.475977	0.0673753	0.00363502
207529	5	13.7158	0.0634352	14.8381	0.0662958	33.4537	0.125421	2.43909	0.00422613	1.08183	0.0019855	23.0977	0.366966	0.057748	0.00192054
207529	6	13.7982	0.0588186	14.8705	0.056522	33.5883	0.111176	2.43428	0.00457895	1.07772	0.00334681	28.9353	0.4988	0.0461894	0.00291581
207529	7	13.8011	0.0859892	14.9193	0.109397	33.6145	0.185135	2.43566	0.00669807	1.08102	0.00338438	30.5625	0.252453	0.0452285	0.000730744
207529	8	13.721	0.0864555	14.8165	0.0896117	33.4199	0.154346	2.43573	0.0190596	1.07985	0.00481511	19.5957	0.330005	0.0736722	0.00339472
207529	9	13.8132	0.0992493	14.9125	0.0717155	33.6339	0.256544	2.4349	0.00285405	1.07961	0.00329302	34.5421	1.11576	0.0407848	0.0028094
207529	10	13.8186	0.0379631	14.9617	0.0975934	33.7395	0.172306	2.44159	0.00878007	1.08271	0.00479167	33.9777	0.447342	0.0436305	0.00220581
207529	11	13.7512	0.0737967	14.8562	0.0631899	33.4757	0.159611	2.4344	0.0018948	1.08037	0.0030382	30.7649	0.850778	0.0443635	0.00104296
207529	12	13.8066	0.0789328	14.9248	0.0718893	33.6819	0.15755	2.43959	0.00434972	1.08101	0.00211894	35.5567	0.88671	0.0391831	0.00257115
207529	13	13.7067	0.0692687	14.8438	0.114951	33.4011	0.214841	2.43683	0.00632294	1.08295	0.00477877	29.4234	0.323659	0.0475108	0.00288911
207529	14	13.7646	0.0774009	14.9032	0.0837807	33.5465	0.112735	2.43721	0.00679645	1.08272	0.00307533	26.3779	0.804711	0.0612118	0.00437623
207529	15	13.7166	0.058273	14.8388	0.0784344	33.4406	0.155873	2.43798	0.00603814	1.08181	0.00314252	35.9203	0.35252	0.0409927	0.00183858
207529	16	13.7877	0.0687844	14.9075	0.0618834	33.6107	0.154717	2.43776	0.00378065	1.08124	0.00209771	40.8545	1.68084	0.0348573	0.00305071
207529	17	13.7625	0.0688332	14.8834	0.0436465	33.5604	0.194715	2.43854	0.00594602	1.08147	0.00292304	29.8266	0.355082	0.0462617	0.00255087
207529	18	13.7589	0.0815848	14.9237	0.0777928	33.651	0.110943	2.44581	0.00661882	1.08468	0.00459141	28.2364	0.642197	0.0465391	0.00154746
207529	19	13.7768	0.0964439	14.8904	0.133531	33.5513	0.261342	2.43533	0.00559302	1.08082	0.00401459	33.0177	1.04907	0.0450785	0.00388923
207529	20	13.7404	0.0755944	14.8571	0.0704032	33.5174	0.142326	2.43935	0.00665333	1.08128	0.00387042	29.0606	0.67123	0.0443134	0.00163296
207529	21	13.8094	0.043314	14.9316	0.0613467	33.6469	0.16602	2.43651	0.00826121	1.08126	0.00293728	34.364	0.934412	0.043035	0.00212892
207529	22	13.7861	0.0547911	14.9135	0.0604041	33.6158	0.129187	2.4384	0.00336781	1.08179	0.00184623	41.159	0.804123	0.0341861	0.0020674
207529	23	13.7959	0.0305266	14.8856	0.047607	33.5737	0.091087	2.4336	0.00356059	1.07899	0.0020468	41.1016	0.880734	0.0400249	0.00155594
207529	24	13.7726	0.0652709	14.8766	0.0637802	33.5464	0.0727522	2.43579	0.0104565	1.08018	0.00560828	32.305	0.645455	0.045493	0.00266749
207529	25	13.7763	0.095517	14.8825	0.0795061	33.5581	0.163784	2.43599	0.00897077	1.08033	0.00549205	28.4158	1.08993	0.0518083	0.00350257
207529	26	13.8181	0.126758	14.9402	0.118188	33.7146	0.246116	2.43997	0.0112611	1.08122	0.00312963	30.2424	0.316864	0.0486575	0.00194749
207529	27	13.7411	0.0656376	14.8908	0.051912	33.5904	0.122516	2.44453	0.00442868	1.08368	0.0035392	27.5279	0.846022	0.0545089	0.0024811
207529	28	13.7347	0.105341	14.8451	0.11266	33.5038	0.220063	2.43937	0.0035215	1.08085	0.00351881	24.7742	0.379507	0.0643014	0.00326252
207529	29	13.76	0.0622688	14.8574	0.0609498	33.4942	0.149726	2.43417	0.00244061	1.07976	0.00167348	38.8438	0.577861	0.0395	0.00140753
207529	30	13.736	0.127736	14.8322	0.157655	33.5139	0.316504	2.43987	0.00412609	1.07979	0.00214584	34.0477	0.811922	0.0403201	0.00170313
207529	31	13.7746	0.0502366	14.8929	0.0512798	33.5709	0.105512	2.43718	0.00274714	1.08119	0.00177033	38.0441	0.762171	0.039266	0.00238118
207529	32	13.7342	0.091041	14.8442	0.124467	33.4151	0.137277	2.433	0.00622437	1.08082	0.00194768	27.9497	0.00952335	0.047518	0.0013586
207529	33	13.7491	0.0855383	14.8885	0.125973	33.589	0.19262	2.44302	0.00987733	1.08285	0.00450459	22.7425	0.402029	0.0672577	0.0035238
207529	34	13.7755	0.0589128	14.8947	0.0949764	33.6031	0.159665	2.43934	0.00545249	1.08123	0.00379709	32.5176	0.451064	0.0431799	0.00235647
207529	35	13.7788	0.114314	14.8898	0.11938	33.5964	0.292625	2.43826	0.00183561	1.08065	0.00577486	30.0306	1.42194	0.0429461	0.00410789
207529	36	13.725	0.0975915	14.809	0.105897	33.5354	0.166764	2.44342	0.00838482	1.07898	0.00316212	25.2198	0.363303	0.0512088	0.00277862
207529	37	13.6919	0.0890079	14.8357	0.109488	33.3992	0.214827	2.43937	0.0120756	1.08354	0.00546533	28.4905	0.26994	0.0435331	0.00136655
224380	1	13.918	0.318712	14.9232	0.356817	33.7053	0.683801	2.42178	0.0264964	1.07225	0.0154023	27.8957	11.1249	0.07178	0.028639
224380	2	13.9506	0.20015	14.865	0.211408	33.6019	0.295323	2.41188	0.0136635	1.06555	0.00771004	38.5108	1.07736	0.0557943	0.00306198
224380	3	13.9297	0.348781	14.8779	0.294103	33.6414	0.676788	2.41518	0.0247269	1.06812	0.0123409	38.8081	4.29102	0.055412	0.00694113
224380	4	13.9453	0.43634	14.9142	0.353575	33.6592	0.861434	2.41379	0.0268512	1.06956	0.0164004	24.8986	1.44913	0.09723	0.00646566
224380	5	13.8615	0.279243	14.8732	0.274304	33.619	0.641029	2.42536	0.0106968	1.0735	0.00658839	58.4757	21.7765	0.0405625	0.00983202
224380	6	13.8835	0.238686	14.8567	0.257623	33.582	0.527677	2.41888	0.0226502	1.07011	0.0111657	31.3462	3.73956	0.0687953	0.00549331
224380	7	13.9011	0.367124	14.8636	0.359867	33.6173	0.79947	2.41838	0.0175375	1.06927	0.0104562	50.4977	17.2682	0.0367628	0.00999722
224380	8	13.9658	0.312722	14.9026	0.28529	33.6992	0.623753	2.41306	0.0229595	1.06712	0.0126365	32.9583	9.44539	0.0620426	0.0137518
224380	9	13.918	0.320475	14.8964	0.313333	33.6497	0.679994	2.41636	0.0221811	1.0697	0.0123583	48.7857	9.45882	0.043465	0.00863439
224380	10	13.9901	0.241332	14.903	0.321229	33.681	0.522748	2.40752	0.0138844	1.06525	0.0122876	26.1871	1.21338	0.0920358	0.00537868
224380	11	13.9844	0.254893	14.8592	0.220247	33.6356	0.525236	2.40527	0.017462	1.06258	0.008275	30.7145	1.50707	0.0708257	0.00465073
182783	1	13.8508	0.263087	14.9075	0.277492	33.5317	0.69298	2.42084	0.0113025	1.07631	0.00320391	77.3506	2.45039	0.0343819	0.0017107
182783	2	13.8294	0.0533909	14.8584	0.0411399	33.4087	0.0846608	2.41746	0.00505007	1.0745	0.00281539	65.5831	0.806848	0.0293858	0.000998091
182783	3	13.8124	0.0660434	14.8441	0.0584372	33.4201	0.131685	2.41968	0.00737767	1.07477	0.00460555	64.1339	0.939424	0.0290764	0.000843993
182783	4	13.8258	0.0988563	14.871	0.097671	33.4731	0.205743	2.42119	0.00611326	1.07566	0.00379483	89.81	3.77905	0.0204804	0.00123793
182783	5	13.8334	0.0938765	14.9171	0.0961437	33.5665	0.162959	2.42683	0.0102131	1.07849	0.00634001	53.0368	1.12365	0.0361948	0.00133526
182783	6	13.7747	0.0932189	14.8686	0.0966081	33.4391	0.206056	2.42774	0.00461492	1.07949	0.00292907	74.2811	3.04144	0.028025	0.00177158
182783	7	13.7473	0.180726	14.7936	0.214302	33.4195	0.449094	2.43101	0.0119221	1.07611	0.00636798	82.4906	1.06173	0.0209275	0.00102318
182783	8	13.7424	0.074854	14.822	0.0854873	33.3599	0.18043	2.42758	0.00463276	1.07858	0.00257468	86.6443	2.88331	0.022086	0.00115897
182783	9	13.8124	0.174674	14.8342	0.153684	33.5012	0.374677	2.42567	0.00777517	1.07412	0.003498	76.539	2.47683	0.0258603	0.00118458
182783	10	13.7578	0.107679	14.747	0.0930851	33.3405	0.201878	2.42362	0.00998717	1.07203	0.00575203	83.1053	2.37462	0.021594	0.00116242
182783	11	13.7856	0.0823092	14.8444	0.0853328	33.4669	0.193311	2.42438	0.00496174	1.07524	0.0025623	72.0913	4.10046	0.0302633	0.00239719
182783	12	13.696	0.0530405	14.7688	0.0587531	33.2299	0.0987156	2.4283	0.00644016	1.07838	0.00326342	56.6973	0.40472	0.0327714	0.00087829
182783	13	13.7182	0.105635	14.7733	0.10923	33.281	0.241507	2.4262	0.00449804	1.07698	0.00235975	82.6822	4.17605	0.0250548	0.00163378
182783	14	13.8565	0.0684122	14.8359	0.0763436	33.5577	0.152906	2.42193	0.00546533	1.07072	0.00305767	63.6291	3.11428	0.0292017	0.00158729
182783	15	13.7783	0.0777228	14.7992	0.072106	33.3619	0.164908	2.42154	0.00527635	1.07419	0.0024382	67.837	3.48661	0.0298049	0.00142191
182783	16	13.7672	0.078298	14.8123	0.0958803	33.3498	0.182006	2.42247	0.00359259	1.07738	0.00243145	75.2974	4.6083	0.028703	0.00157972
182783	17	13.7649	0.0716065	14.8119	0.0802822	33.3328	0.172715	2.42165	0.00468395	1.07611	0.00318868	79.4465	3.11132	0.0248076	0.00114484
182783	18	13.7811	0.115361	14.7981	0.115478	33.3968	0.252549	2.42352	0.00482964	1.07386	0.00269542	93.7981	3.95097	0.0219264	0.00106009
182783	19	13.7295	0.0705825	14.7832	0.0729174	33.2513	0.164138	2.42201	0.00595782	1.0768	0.00272002	66.2226	1.4399	0.0284023	0.0007612
182783	20	13.7145	0.0882827	14.7625	0.100311	33.2372	0.244731	2.4198	0.00408344	1.07669	0.00236081	82.3241	2.96511	0.0245767	0.00120014
182783	21	13.8141	0.163667	14.8427	0.175185	33.4085	0.374124	2.41855	0.00803059	1.07448	0.00318175	64.3842	1.79047	0.028335	0.0013528
182783	22	13.8308	0.0478246	14.8869	0.0468806	33.4629	0.108653	2.42052	0.00420451	1.07547	0.00265248	67.0869	1.31667	0.0282184	0.000845053
182783	23	13.8076	0.0585092	14.8801	0.0617309	33.4003	0.12178	2.41906	0.00562722	1.07773	0.00402524	66.2085	0.685553	0.0283908	0.000723211
182783	24	13.793	0.0541183	14.8598	0.0497819	33.3924	0.114311	2.42111	0.00571496	1.07742	0.00284452	65.9417	1.56278	0.0286126	0.00100505
182783	25	13.8508	0.146683	14.8827	0.161756	33.5154	0.334321	2.41984	0.008982	1.07453	0.00483714	68.327	2.01719	0.0280053	0.00132197
182783	26	13.8645	0.278348	14.8517	0.244233	33.4569	0.579405	2.41347	0.0108956	1.07139	0.00519747	93.558	1.77946	0.019481	0.00094231
207528	1	13.6734	0.130338	14.7954	0.13951	33.3964	0.329869	2.44243	0.00516676	1.08208	0.00260508	44.9675	1.08507	0.0332291	0.00111137
207528	2	13.6997	0.123582	14.8576	0.132764	33.4849	0.294708	2.44424	0.0024512	1.08453	0.00126084	57.9008	1.40088	0.0246262	0.000934141
207528	3	13.5419	0.285984	14.6733	0.278694	33.1395	0.664643	2.44733	0.00597613	1.08368	0.00346607	35.1264	2.31064	0.0404516	0.00289969
207528	4	13.6226	0.0431529	14.7528	0.047726	33.2753	0.107966	2.44265	0.00178828	1.08296	0.000889862	64.8822	1.02886	0.0211461	0.000499957
207528	5	13.6217	0.0652385	14.7346	0.0776316	33.2111	0.167161	2.4381	0.00332006	1.0817	0.00148653	72.2219	1.90643	0.0171179	0.000552876
207528	6	13.6524	0.147291	14.7931	0.164857	33.3484	0.370377	2.44264	0.00217709	1.08353	0.00105482	109.803	1.35619	0.0128768	0.000354852
207528	7	13.6415	0.122086	14.7522	0.130011	33.2826	0.307417	2.4398	0.00309893	1.08143	0.00152791	67.5601	2.02146	0.0206141	0.000721553
207528	8	13.693	0.188425	14.812	0.196972	33.4268	0.451097	2.44123	0.0069953	1.08176	0.00326853	41.5816	1.30043	0.0336059	0.00144024
207528	9	13.6663	0.181254	14.7426	0.211998	33.2899	0.477186	2.43581	0.00689887	1.07872	0.00358033	59.7928	2.81847	0.0201343	0.000744723
207528	10	13.7527	0.270788	14.7991	0.317865	33.4573	0.709071	2.43264	0.00802953	1.07602	0.00532312	27.1363	1.04316	0.0527667	0.0016986
207528	11	13.6847	0.142766	14.7843	0.163751	33.3477	0.365377	2.43683	0.00428028	1.08035	0.00271314	95.192	2.42163	0.0133615	0.000770464
207528	12	13.5567	0.183993	14.6775	0.198762	33.1081	0.449503	2.44219	0.0012235	1.08267	0.00101675	105.401	2.02101	0.0125919	0.000665519
207528	13	13.5784	0.116305	14.725	0.121326	33.1573	0.266166	2.44196	0.00326597	1.08446	0.00264036	45.892	1.59914	0.024764	0.000819563
207528	14	13.7338	0.193398	14.7615	0.193469	33.344	0.434291	2.42799	0.00496871	1.07488	0.00292315	78.0764	1.78174	0.0170258	0.000565211
207528	15	13.6385	0.16112	14.7806	0.17473	33.3379	0.400436	2.44439	0.0035163	1.08375	0.00191012	47.2795	0.745796	0.0240453	0.000655353
207528	16	13.7399	0.13776	14.819	0.148822	33.477	0.34938	2.43643	0.00382438	1.07854	0.00193825	46.9147	0.789131	0.0267769	0.000775365
207528	17	13.6493	0.115218	14.7921	0.128847	33.3989	0.272739	2.44701	0.0142382	1.08374	0.00576278	27.4491	0.673295	0.0465697	0.00118101
207528	18	13.6165	0.126345	14.7664	0.140702	33.327	0.310601	2.44755	0.00521946	1.08444	0.0020731	60.9092	0.879743	0.0193167	0.000794097
207528	19	13.6824	0.0884751	14.836	0.101471	33.4832	0.203384	2.44719	0.00365255	1.08431	0.00235079	67.5508	1.25059	0.0201999	0.000746102
207528	20	13.5834	0.21701	14.7219	0.243451	33.2182	0.498869	2.44562	0.00796555	1.08381	0.00334666	47.4101	1.24421	0.0241268	0.000932655
224339	1	13.9479	0.14888	14.946	0.156928	33.5875	0.332517	2.40808	0.00758156	1.07156	0.00377441	101.589	6.66972	0.0127275	0.00154364
224339	2	14.0149	0.308234	15.0206	0.298781	33.6943	0.625842	2.40425	0.0224893	1.07179	0.0121883	30.1392	9.51252	0.0494086	0.0140642
224339	3	13.9981	0.200936	14.9572	0.203682	33.736	0.509609	2.41011	0.011723	1.06856	0.00827529	48.7795	9.93372	0.0321929	0.00513776
224339	4	13.9797	0.262009	14.9923	0.266423	33.6562	0.591125	2.40798	0.0162219	1.07245	0.0094179	30.6761	5.08121	0.0469037	0.0082322
224339	5	13.9898	0.295916	14.9844	0.334809	33.6493	0.659228	2.40656	0.0153537	1.07109	0.00845562	48.6411	19.091	0.0303948	0.0120927
224339	6	13.9607	0.235567	14.9642	0.245466	33.6121	0.555691	2.40764	0.0119396	1.07189	0.0063638	50.3569	16.4922	0.0312057	0.00824615
224339	7	13.9865	0.251436	14.9864	0.270039	33.6613	0.597281	2.40677	0.0173092	1.0715	0.00919264	44.103	14.5159	0.0206441	0.00358685
224339	8	14.0192	0.316146	15.0212	0.321297	33.7524	0.651592	2.40608	0.0146381	1.07083	0.00682101	53.2876	31.846	0.0269768	0.0220427
224339	9	13.9997	0.249191	14.985	0.231966	33.6355	0.492087	2.40215	0.0240047	1.06987	0.0114818	49.3297	18.6572	0.0284607	0.0111247
224339	10	13.9834	0.262784	14.973	0.280468	33.6484	0.629156	2.40632	0.0104477	1.07078	0.00674164	47.888	12.2285	0.036272	0.00895834
224339	11	13.9624	0.192874	14.9534	0.203926	33.603	0.454848	2.40671	0.011683	1.07095	0.00618187	54.9047	12.2355	0.0265416	0.00805457
224339	12	13.9814	0.216395	14.9757	0.228775	33.6997	0.434233	2.40933	0.0092418	1.07123	0.00439822	79.5803	44.7144	0.0226372	0.012867
224339	13	13.9626	0.224195	14.9771	0.214221	33.6252	0.493148	2.40825	0.0143252	1.07268	0.00762224	44.306	13.0905	0.0339963	0.0107969
224339	14	13.9715	0.223644	14.9762	0.253401	33.6381	0.544404	2.40762	0.0105612	1.07191	0.00599221	74.5306	19.3118	0.0246398	0.00481291
224339	15	13.9749	0.241969	14.9812	0.289016	33.6458	0.581286	2.40761	0.0110738	1.07151	0.00593691	63.8929	19.8711	0.0246974	0.00766207
224339	16	13.9891	0.217661	14.9588	0.215166	33.7599	0.633221	2.41329	0.0198035	1.06933	0.00784198	58.5014	15.9182	0.0271762	0.00841666
224339	17	13.9941	0.26074	15.0029	0.276692	33.6953	0.606469	2.40785	0.0161053	1.07209	0.00921612	37.3965	13.4349	0.0422138	0.0141365
224339	18	14.0101	0.253602	15.023	0.306007	33.7131	0.600685	2.40805	0.020859	1.07224	0.013267	27.9051	9.80184	0.0501933	0.0186365
224339	19	13.9969	0.269632	14.9921	0.305494	33.6958	0.657605	2.40728	0.0136171	1.07112	0.00858171	46.6981	19.0095	0.0318551	0.0141853
224339	20	13.9835	0.250434	14.9768	0.261076	33.6646	0.530988	2.40814	0.00937954	1.07085	0.0064027	58.3087	22.7116	0.0268473	0.0106083
224339	21	13.9981	0.204896	14.9911	0.243485	33.6921	0.47305	2.40692	0.0114644	1.07094	0.00804029	44.2852	9.69406	0.0369701	0.00563285
224339	22	13.9674	0.180354	14.9743	0.185546	33.6188	0.400988	2.40728	0.0122228	1.07209	0.00674668	58.4381	8.33584	0.0276076	0.0035517
224339	23	13.9907	0.268102	14.9759	0.275942	33.6632	0.604254	2.40613	0.0143184	1.07042	0.00793031	50.5001	18.4626	0.0330874	0.011036
224339	24	13.9978	0.248838	14.9983	0.308793	33.6814	0.604817	2.40621	0.016766	1.07148	0.0122687	28.1154	1.7123	0.0517956	0.00456098
224339	25	14.0195	0.312071	15.0165	0.324502	33.7539	0.699087	2.40766	0.0146886	1.07091	0.00810891	42.5685	15.8983	0.0398632	0.0127471
224339	26	13.9809	0.212729	14.9897	0.235324	33.6331	0.527403	2.40566	0.0101517	1.07214	0.00539988	56.3816	22.5882	0.0272764	0.00979078
224339	27	13.9958	0.240326	14.9751	0.255072	33.7567	0.523218	2.41132	0.0132644	1.06995	0.00663552	61.6876	31.8948	0.0282817	0.00998656
224339	28	13.948	0.166009	14.9497	0.186579	33.5871	0.374051	2.40799	0.00798988	1.07132	0.00394409	90.4965	21.9873	0.0153311	0.00379525
224339	29	13.965	0.22195	14.9498	0.247944	33.5715	0.530593	2.40398	0.0102869	1.07052	0.00579404	61.546	17.3314	0.0277959	0.00562021
224339	30	13.9959	0.248265	14.9987	0.285182	33.6771	0.603309	2.40511	0.0198016	1.07116	0.0127171	33.2687	10.918	0.0462636	0.0118721
224339	31	13.9658	0.317227	14.9648	0.321313	33.6146	0.694299	2.40666	0.0129465	1.07153	0.00663571	54.624	22.5929	0.0278271	0.0099084
224339	32	13.9866	0.249348	14.9661	0.248123	33.7216	0.623309	2.41101	0.0137629	1.07024	0.00726016	67.9409	18.36	0.0203414	0.00634104
224339	33	13.9894	0.261592	14.9976	0.270553	33.7244	0.588528	2.41069	0.0199007	1.07207	0.0110161	33.2507	7.59525	0.0474825	0.00703116
224339	34	14.0126	0.19886	15.0017	0.217347	33.7262	0.486025	2.40582	0.0192315	1.0704	0.00810312	42.3189	14.9525	0.03657	0.00969872
219901	1	13.8057	0.206969	14.868	0.21631	33.525	0.506465	2.42836	0.0115933	1.07716	0.00629822	54.859	11.6107	0.0463661	0.00600494
219901	2	13.7887	0.220065	14.8483	0.232535	33.495	0.524641	2.42916	0.0107443	1.07685	0.00639846	63.3866	11.9128	0.0366015	0.00612261
219901	3	13.8382	0.240418	14.8957	0.260756	33.6137	0.553652	2.42905	0.0153799	1.07648	0.0092833	48.2166	16.7111	0.0430963	0.0146725
219901	4	13.7482	0.181418	14.8039	0.185174	33.3999	0.417196	2.42942	0.0105011	1.07679	0.00598102	71.2317	5.04245	0.0285146	0.00249941
219901	5	13.7672	0.18753	14.8174	0.20053	33.4993	0.465887	2.43328	0.0120929	1.07629	0.00719557	62.1416	2.03704	0.0331446	0.0014372
219901	6	13.8692	0.275848	14.9286	0.270754	33.6699	0.657444	2.429	0.016983	1.07646	0.00833483	43.4847	19.3153	0.0509446	0.0255433
219901	7	13.7616	0.290354	14.8208	0.268415	33.4622	0.634042	2.4316	0.0179767	1.07699	0.00765129	38.4165	1.74971	0.0495565	0.00210457
219901	8	13.7582	0.187975	14.8301	0.201138	33.4669	0.440299	2.43251	0.00824703	1.07791	0.00464457	106.083	3.97655	0.0211587	0.00151527
219901	9	13.7709	0.275978	14.8296	0.273375	33.4683	0.648864	2.43037	0.0122804	1.07689	0.00766075	60.289	9.36222	0.0394732	0.00542241
219901	10	13.777	0.521958	14.8427	0.553127	33.4917	1.23736	2.43102	0.010445	1.07737	0.00584827	87.3337	5.11362	0.0234259	0.00116091
219901	11	13.8059	0.344461	14.868	0.391405	33.5536	0.852468	2.4304	0.0164841	1.07693	0.00961335	50.9403	13.8276	0.046834	0.0105562
219901	12	13.8276	0.193123	14.8807	0.219588	33.5875	0.442487	2.42903	0.00859789	1.07616	0.0071042	47.7199	2.23075	0.0438903	0.00157888
219901	13	13.7898	0.275826	14.8523	0.308254	33.5167	0.694408	2.43054	0.0126603	1.07705	0.00645112	64.366	12.6724	0.0391544	0.00627777
219901	14	13.8383	0.264718	14.9068	0.26683	33.617	0.617512	2.4293	0.019682	1.07723	0.0111844	39.9672	8.37773	0.0640094	0.0112162
219901	15	13.8773	0.401733	14.9262	0.417875	33.7232	0.87774	2.42845	0.0221648	1.0752	0.0107658	38.7062	27.9132	0.066647	0.0444662
219901	16	13.7706	0.259866	14.8251	0.286353	33.4597	0.621826	2.42981	0.0108681	1.07644	0.00529264	73.3142	29.1315	0.0316454	0.0112718
219901	17	13.7983	0.333086	14.8543	0.35914	33.5141	0.772337	2.42848	0.0121276	1.07672	0.0068398	60.6652	22.4545	0.0388072	0.0129074
219901	18	13.7525	0.227131	14.8115	0.241783	33.4059	0.528759	2.42936	0.00952513	1.07701	0.00619689	65.6356	12.3783	0.0380877	0.00572705
219901	19	13.7559	0.182886	14.8117	0.201631	33.421	0.443505	2.42958	0.0103938	1.07676	0.00586769	71.072	23.0789	0.0326019	0.00899762
219901	20	13.7808	0.208927	14.839	0.220957	33.4926	0.467934	2.43039	0.0152331	1.0768	0.00969629	47.1676	9.23503	0.0508974	0.00686788
219901	21	13.8255	0.389719	14.8735	0.390098	33.5848	0.873841	2.42923	0.015456	1.07557	0.00751098	54.4454	15.6585	0.0453704	0.0109547
219901	22	13.8329	0.300987	14.8908	0.32527	33.5795	0.706702	2.42761	0.0133343	1.07652	0.00810661	52.5558	21.6148	0.0476579	0.0141265
219901	23	13.8636	0.393171	14.9331	0.400006	33.7088	0.880449	2.43208	0.0208465	1.07749	0.00961576	41.425	39.3662	0.0694487	0.0454715
219901	24	13.7583	0.209225	14.8184	0.230369	33.4273	0.5104	2.42957	0.0107164	1.07705	0.00611442	68.3644	11.4621	0.0335503	0.00509524
219901	25	13.762	0.231374	14.8086	0.260457	33.4165	0.554414	2.42818	0.0117521	1.07605	0.00711406	57.1027	14.0393	0.0367705	0.00961718
219901	26	13.7881	0.294292	14.8451	0.312805	33.4809	0.688968	2.42836	0.0107025	1.07675	0.00586753	59.6893	25.7909	0.0403023	0.0136765
219901	27	13.8201	0.296047	14.8792	0.301506	33.5662	0.678832	2.42883	0.0137888	1.07665	0.00770234	54.6937	25.5277	0.0373386	0.0155439
219901	28	13.8042	0.259555	14.85	0.251636	33.5134	0.539061	2.42888	0.0148297	1.07629	0.00771248	52.7276	16.6399	0.0412907	0.0114258
219901	29	13.8129	0.266804	14.8637	0.250618	33.5496	0.580302	2.42889	0.0106969	1.07609	0.00608321	63.2564	4.46252	0.0332751	0.00244264
219901	30	13.7901	0.24398	14.8486	0.267225	33.5031	0.570771	2.42952	0.011128	1.07676	0.00593669	65.0412	18.7133	0.0310817	0.0095055
219901	31	13.7703	0.249474	14.8302	0.282444	33.4497	0.613933	2.42789	0.0112162	1.07642	0.00659182	72.2662	16.8857	0.0270272	0.00741883
219901	32	13.7785	0.284908	14.8437	0.33622	33.4565	0.674092	2.42809	0.0112134	1.0767	0.00685692	56.3587	8.95503	0.0370177	0.00481615
219901	33	13.7782	0.295111	14.842	0.31601	33.476	0.664036	2.42966	0.0185291	1.07722	0.0101692	38.263	8.9009	0.0502133	0.0113487
219901	34	13.8192	0.250628	14.8683	0.281515	33.557	0.574264	2.42883	0.0146717	1.07612	0.00652759	51.336	18.2966	0.045782	0.0108887
219901	35	13.7833	0.232323	14.8459	0.256336	33.4664	0.574959	2.42805	0.0134994	1.07709	0.00767869	53.0397	8.28336	0.0479114	0.00495015
207527	1	13.7755	0.104242	14.8824	0.103509	33.6003	0.250626	2.43916	0.00487187	1.08039	0.00312075	42.5505	1.11788	0.0347346	0.00123546
207527	2	13.8069	0.113184	14.8715	0.124659	33.667	0.22534	2.43848	0.005139	1.07711	0.00284594	41.0889	1.70834	0.0335949	0.000801974
207527	3	13.7544	0.0588096	14.8818	0.0585397	33.5591	0.139763	2.43991	0.00200955	1.08199	0.00113997	60.9863	2.02659	0.0248945	0.00102592
207527	4	13.7523	0.0993103	14.8434	0.107416	33.5507	0.245406	2.43967	0.00656214	1.07936	0.00316193	44.9652	0.87421	0.031302	0.000985378
207527	5	13.7239	0.0741146	14.8459	0.0701043	33.5028	0.164005	2.44126	0.00562131	1.08178	0.00230304	40.6488	0.241007	0.0334246	0.00117754
207527	6	13.7008	0.0393725	14.8005	0.0469473	33.4108	0.102776	2.43861	0.00283453	1.08027	0.00162299	44.4151	0.780284	0.0297181	0.000783048
207527	7	13.7617	0.10621	14.9004	0.107398	33.6084	0.240339	2.44224	0.00485414	1.08278	0.00286791	44.8444	1.36313	0.0320856	0.00195758
207527	8	13.8153	0.0435673	14.9373	0.0422951	33.7013	0.0708571	2.44081	0.00433848	1.08125	0.0021242	29.2965	1.16269	0.0473109	0.00259204
207527	9	13.7849	0.0638656	14.8668	0.0575168	33.61	0.128192	2.43825	0.00449467	1.07852	0.00267178	35.921	0.446826	0.040491	0.00119472
207527	10	13.7605	0.0964121	14.8631	0.084636	33.5443	0.143556	2.4379	0.011307	1.08019	0.00535424	34.1877	0.352774	0.0367079	0.00167631
207527	11	13.7963	0.116651	14.9199	0.135846	33.6957	0.32207	2.44232	0.0047333	1.08143	0.00223737	48.2852	0.870719	0.0294453	0.00115692
207527	12	13.838	0.089105	14.941	0.0976869	33.8071	0.212675	2.44311	0.00550043	1.07971	0.00211753	38.8431	1.66791	0.0453673	0.00245234
207527	13	13.8168	0.0477657	14.8968	0.0494787	33.704	0.116922	2.43937	0.00439332	1.07818	0.00240468	42.8655	0.433936	0.0354425	0.000877226
207527	14	13.8283	0.0870158	14.9534	0.0840597	33.7369	0.181409	2.4398	0.00443056	1.08141	0.00301151	39.4353	1.96954	0.0389004	0.00205867
207527	15	13.7282	0.070847	14.8605	0.0656057	33.4817	0.115553	2.43899	0.00699708	1.08251	0.00351007	38.5922	0.517698	0.0392989	0.00112647
207527	16	13.8207	0.0749482	14.8895	0.0821484	33.7307	0.180555	2.44061	0.00489699	1.07736	0.00347205	35.7729	0.42526	0.0423832	0.00078447
207527	17	13.8351	0.101608	14.9309	0.085375	33.7249	0.177872	2.43781	0.00945575	1.07927	0.00446464	35.5835	0.800738	0.0387014	0.00110191
207527	18	13.744	0.0671158	14.8971	0.0672395	33.5891	0.137796	2.44395	0.00671642	1.08392	0.00369007	37.7305	0.363054	0.0398563	0.0011306
207527	19	13.7945	0.0939962	14.8891	0.100431	33.6531	0.202172	2.43968	0.00478071	1.07937	0.00312966	44.1673	1.20038	0.0336073	0.00141672
207527	20	13.7355	0.0648779	14.8627	0.0598409	33.5483	0.126095	2.44251	0.00545934	1.08209	0.00296933	42.9208	0.359625	0.0349266	0.00104223
207527	21	13.8152	0.159182	14.9088	0.17818	33.742	0.398209	2.44239	0.00646659	1.07915	0.00287483	42.8899	1.76413	0.0355212	0.00201539
207527	22	13.7567	0.0528399	14.8529	0.052242	33.5414	0.118479	2.43824	0.00243154	1.07971	0.00123169	60.5708	1.82322	0.0243692	0.00104595
207527	23	13.7551	0.0485907	14.8713	0.0515795	33.541	0.11387	2.43847	0.00211011	1.08116	0.00132691	52.9491	2.15265	0.0284709	0.00143847
207527	24	13.7326	0.0351788	14.833	0.042022	33.5075	0.0863783	2.44	0.00260954	1.08013	0.00163635	52.5532	1.54878	0.0269685	0.00115476
207527	25	13.8123	0.0913442	14.9048	0.102747	33.6904	0.205403	2.43921	0.00642687	1.07911	0.00376038	40.131	0.522891	0.0324967	0.00124221
207527	26	13.8072	0.101784	14.9293	0.121163	33.6742	0.263692	2.43888	0.00581587	1.08126	0.00319266	41.6371	1.78025	0.0330987	0.00195618
207527	27	13.7815	0.0606579	14.8937	0.0595626	33.6272	0.13775	2.4401	0.0031479	1.08041	0.00119814	44.5208	2.22825	0.0315497	0.00147149
179449	1	13.6407	0.038563	14.728	0.0584786	33.4105	0.0986159	2.44931	0.00153951	1.07971	0.00158441	44.6383	1.19497	0.0271562	0.000916652
179449	2	13.7683	0.0953585	14.8328	0.103347	33.6824	0.22432	2.44639	0.00117585	1.07732	0.00163778	74.7231	2.54592	0.017178	0.000861281
179449	3	13.7948	0.0941311	14.8898	0.0918886	33.7971	0.214007	2.45	0.00173983	1.07938	0.000764169	97.5736	1.98289	0.0116934	0.000295568
179449	4	13.7474	0.0179279	14.8455	0.0471357	33.6273	0.111589	2.44608	0.00577545	1.07988	0.00342915	49.6588	0.797807	0.0204752	0.000615774
179449	5	13.8044	0.119641	14.8453	0.0905619	33.7208	0.233909	2.44279	0.00480807	1.07543	0.00431698	54.2797	2.95682	0.0225067	0.00251531
179449	6	13.7554	0.0422492	14.8427	0.0363396	33.6909	0.0944506	2.44929	0.00389423	1.07905	0.00239742	69.7987	1.47086	0.0140793	0.000322323
179449	7	13.7428	0.0688615	14.8336	0.0636287	33.6413	0.154378	2.44794	0.00330181	1.07938	0.00153154	57.8212	1.1106	0.0192651	0.000991159
179449	8	13.6528	0.0475933	14.7238	0.054377	33.4012	0.091882	2.44648	0.00217559	1.07844	0.000812845	64.5858	0.611555	0.0216942	0.000977799
179449	9	13.7881	0.0442494	14.8802	0.0434197	33.7535	0.115232	2.44801	0.00221655	1.07921	0.000820108	84.8091	5.28914	0.0155002	0.00132053
179449	10	13.7655	0.0372238	14.8342	0.162454	33.6967	0.331921	2.44789	0.0174931	1.07763	0.0088875	41.8893	2.07963	0.0239281	0.0015219
179449	11	13.7364	0.101426	14.8294	0.104052	33.6508	0.234194	2.44977	0.00314754	1.07958	0.0015075	53.2697	1.76271	0.0202361	0.000743577
179449	12	13.7795	0.0716791	14.8686	0.060312	33.7683	0.14181	2.45063	0.00486467	1.07905	0.00265694	50.3922	1.82457	0.0192606	0.00111174
179449	13	13.693	0.0505469	14.803	0.0453491	33.5665	0.144224	2.45137	0.00148363	1.08107	0.000678855	49.7996	2.71881	0.0273225	0.000479748
179449	14	13.6196	0.0464233	14.7358	0.0814406	33.4333	0.115209	2.45482	0.00932147	1.08196	0.00549402	33.1745	0.5811	0.0261723	0.000936859
142810	1	13.7965	0.0800705	14.8629	0.0854737	33.6817	0.165475	2.4414	0.00742727	1.0773	0.00199871	29.8541	1.92424	0.0766801	0.00543378
142810	2	13.7683	0.0467234	14.846	0.0515802	33.599	0.109771	2.44036	0.00403109	1.0783	0.00214202	30.9885	2.14006	0.0747056	0.00486312
142810	3	13.7911	0.0605618	14.8271	0.0465231	33.569	0.109793	2.43425	0.00557138	1.0752	0.00276045	28.6849	2.0471	0.0759632	0.00433505
142810	4	13.7547	0.0981134	14.8408	0.101177	33.5926	0.186591	2.44234	0.00604604	1.07898	0.00310736	31.6298	1.43643	0.0651036	0.00408558
142810	5	13.762	0.032907	14.845	0.0331055	33.5729	0.0832109	2.43956	0.00294877	1.07872	0.00199643	30.8593	1.83861	0.0682602	0.00347891
142810	6	13.7421	0.0292484	14.7911	0.0329346	33.5014	0.0562045	2.43911	0.00309316	1.07635	0.00186035	27.9171	0.792654	0.0803602	0.00303823
142810	7	13.7879	0.343262	14.8494	0.443469	33.7429	0.634647	2.44737	0.0149001	1.07695	0.00535194	25.7063	1.72843	0.0711826	0.0060305
142810	8	13.7766	0.0359801	14.8588	0.0451075	33.6348	0.0888409	2.44147	0.00388569	1.07856	0.00200373	28.8279	1.9469	0.0769686	0.0054478
142810	9	13.8449	0.074131	14.8466	0.0714399	33.725	0.169298	2.43594	0.00373767	1.07238	0.00269315	30.949	1.67311	0.0594025	0.00300529
142810	10	13.819	0.0448114	14.825	0.0421911	33.6652	0.0855894	2.43776	0.0048231	1.07284	0.00287726	25.4845	1.71163	0.0804384	0.0040662
142810	11	13.7679	0.0417789	14.8482	0.0452846	33.6083	0.0895707	2.4411	0.00309521	1.07848	0.002141	36.3401	2.80331	0.0679579	0.00422171
142810	12	13.7345	0.0346963	14.7894	0.0342064	33.539	0.0797578	2.44197	0.00296095	1.07683	0.00201073	32.8329	1.56137	0.0681192	0.0030059
142810	13	13.7046	0.0297914	14.7881	0.0328678	33.4967	0.0660835	2.44422	0.00307329	1.07908	0.00210052	30.1212	1.23232	0.0696053	0.00245643
142810	14	13.7773	0.0457516	14.8286	0.0519625	33.5904	0.10849	2.43812	0.00318745	1.07631	0.00199009	35.8491	2.45322	0.0618335	0.00462939
142810	15	13.788	0.0467237	14.8144	0.0468006	33.6064	0.0866953	2.43646	0.00337529	1.07447	0.00254261	26.8432	1.83283	0.0734199	0.00491506
142810	16	13.7377	0.0473846	14.7943	0.0550413	33.5258	0.110817	2.44047	0.00410626	1.07693	0.00247329	26.0771	0.684178	0.0819816	0.00275837
142810	17	13.7201	0.0428828	14.7514	0.046366	33.4223	0.0852011	2.43786	0.0047162	1.07519	0.00254879	24.1524	1.07196	0.0798075	0.00628071
142810	18	13.7633	0.0386621	14.8129	0.0407344	33.5567	0.0891777	2.43817	0.00323325	1.07573	0.00150203	34.6115	2.27309	0.0630008	0.00274931
142810	19	13.7929	0.0426002	14.8398	0.0563327	33.6231	0.108739	2.43774	0.00652394	1.07591	0.00302955	27.0614	1.86137	0.0832466	0.00551412
142810	20	13.7576	0.142621	14.8086	0.154913	33.6387	0.308909	2.44519	0.0118073	1.07643	0.00669084	22.1657	0.851	0.0924362	0.00256126
142810	21	13.7218	0.0367458	14.7981	0.0365691	33.5039	0.0837266	2.4417	0.00402662	1.07846	0.00202324	32.4469	2.03752	0.0629106	0.00400596
142810	22	13.7475	0.0481982	14.8112	0.0525724	33.5653	0.121249	2.44157	0.00314412	1.07739	0.00183646	29.7665	3.41284	0.0757287	0.00673919
142810	23	13.7502	0.0495919	14.7948	0.0498684	33.523	0.116307	2.43804	0.00384233	1.076	0.0026121	26.2655	1.86631	0.0767145	0.00379334
142810	24	13.6999	0.0274782	14.758	0.0336379	33.4435	0.0617882	2.44116	0.00273727	1.07724	0.00143005	36.2076	2.12198	0.0551717	0.0033125
142810	25	13.74	0.062797	14.7725	0.0971521	33.4779	0.157972	2.43656	0.00815456	1.07515	0.00501625	22.8329	0.143878	0.0805132	0.00493825
142810	26	13.7314	0.0819984	14.7965	0.0884642	33.5145	0.190202	2.44075	0.00619787	1.07758	0.00315865	23.2158	0.848464	0.0792844	0.00386569
142810	27	13.7872	0.063186	14.835	0.0659009	33.6065	0.14182	2.43757	0.00386508	1.07695	0.00213954	30.7974	2.92356	0.0725999	0.0106306
142810	28	13.7297	0.0383387	14.7788	0.0435429	33.5134	0.100167	2.44096	0.00385108	1.07643	0.00210036	32.6099	2.17082	0.0602845	0.00390974
224316	1	13.8303	0.512049	14.8777	0.5155	33.6432	1.07748	2.4327	0.0209295	1.07577	0.0109116	34.0689	3.29863	0.0643211	0.00437901
224316	2	13.8963	0.256047	14.8354	0.234426	33.5669	0.530942	2.41558	0.0217267	1.06762	0.0150019	30.2774	3.53281	0.0561058	0.00467527
224316	3	13.8075	0.284879	14.8527	0.348308	33.5687	0.805594	2.43118	0.0236804	1.0757	0.0115657	30.5915	1.94791	0.0591652	0.00409805
224316	4	13.7781	0.255433	14.839	0.245273	33.5421	0.570594	2.43446	0.0122148	1.07748	0.00780913	43.7299	13.0481	0.0375956	0.0116144
224316	5	13.8651	0.270472	14.8587	0.2085	33.5645	0.451356	2.42087	0.024296	1.07169	0.0114873	59.0067	10.0651	0.0275161	0.00666891
224316	6	13.8718	0.468885	14.8474	0.524038	33.5615	1.10845	2.41944	0.0179517	1.07033	0.0102943	28.8052	1.3257	0.05602	0.00434536
224316	7	13.8195	0.39337	14.8869	0.416025	33.6209	0.94342	2.43287	0.0106212	1.07725	0.00503941	74.2905	8.87048	0.0249929	0.00332939
224316	8	13.7601	0.204427	14.8172	0.256092	33.4689	0.508305	2.43233	0.0156077	1.07683	0.00832688	45.8934	1.09674	0.0304278	0.00247818
224316	9	13.7558	0.284443	14.8123	0.314795	33.4596	0.668695	2.43241	0.0136989	1.0768	0.00728737	43.5252	2.76276	0.0337807	0.00256515
224316	10	13.7726	0.304425	14.7955	0.327108	33.4417	0.697856	2.42817	0.0231624	1.07428	0.0120859	27.3522	0.7759	0.0475512	0.00408169
224316	11	13.7563	0.244701	14.8155	0.280267	33.4845	0.607404	2.43413	0.0127917	1.077	0.00784529	46.6441	14.4289	0.0283912	0.0114044
224316	12	13.789	0.193003	14.8583	0.235032	33.5325	0.4451	2.43184	0.0114107	1.07755	0.00878467	53.895	3.97923	0.0239086	0.00401159
224316	13	13.7858	0.5386	14.8091	0.610389	33.465	1.29302	2.42752	0.0135283	1.07422	0.0100456	30.2202	1.8214	0.0376523	0.00522001
224316	14	13.7435	0.195748	14.811	0.259059	33.4673	0.522584	2.43514	0.0174483	1.07768	0.0109463	45.6972	5.60409	0.0317292	0.00426099
224316	15	13.7808	0.306984	14.8137	0.315054	33.4877	0.735966	2.43006	0.0162224	1.07497	0.00823058	39.6305	1.21782	0.0381306	0.00196857
224316	16	13.7629	0.279916	14.8266	0.297625	33.4902	0.648031	2.43339	0.011082	1.07729	0.00625105	55.5102	5.4251	0.029712	0.0016184
224316	17	13.7786	0.342865	14.846	0.388061	33.5282	0.825073	2.43337	0.0103397	1.07747	0.0059249	60.2106	14.5094	0.0237079	0.00707823
224316	18	13.8265	0.419268	14.8882	0.437401	33.654	0.910192	2.4341	0.0153835	1.07681	0.00808346	42.699	8.36929	0.0301537	0.00920985
224316	19	13.7988	0.370047	14.8103	0.398173	33.4595	0.898341	2.42482	0.0134548	1.07331	0.00834133	59.6566	2.93436	0.0251762	0.00211421
224316	20	13.7419	0.305977	14.8005	0.320477	33.4306	0.706714	2.43279	0.0174538	1.07705	0.00879118	47.6804	8.20788	0.0298089	0.00687465
224316	21	13.8247	0.197074	14.8424	0.259343	33.5585	0.477969	2.42745	0.0186431	1.07362	0.0107467	40.9555	7.01069	0.0372172	0.00594918
224316	22	13.7634	0.258463	14.8303	0.279953	33.4949	0.635697	2.43389	0.0108957	1.07755	0.00660075	57.5779	23.8696	0.0286129	0.010719
224316	23	13.8191	0.343855	14.8813	0.369859	33.5968	0.837868	2.43121	0.019101	1.07688	0.0100835	43.5529	2.58301	0.0467754	0.00451066
224316	24	13.8742	0.43735	14.8726	0.399064	33.5986	0.90714	2.42178	0.0308877	1.07202	0.0147084	62.1766	8.56864	0.0274099	0.003373
224316	25	13.7866	0.644599	14.8442	0.545682	33.5928	1.34273	2.43685	0.0330834	1.07685	0.016145	18.579	0.815147	0.0732174	0.00456801
224316	26	13.7629	0.223373	14.8191	0.239777	33.463	0.542067	2.43105	0.0132916	1.07675	0.00663994	50.0432	8.58137	0.0381293	0.00293256
224316	27	13.8674	0.40511	14.9208	0.426556	33.7242	0.859883	2.43197	0.0156941	1.07597	0.00855019	43.9468	7.04833	0.0301281	0.00597284
178059	1	13.9095	0.0309825	15.0152	0.0437413	33.8744	0.0993504	2.43304	0.00158955	1.07847	0.000834276	56.4245	2.60175	0.0239564	0.00114846
178059	2	13.9378	0.0624224	15.0422	0.0690444	33.9439	0.149613	2.43539	0.00201305	1.07924	0.000992527	54.9437	0.370321	0.0205094	0.00012585
178059	3	13.933	0.0591374	15.0629	0.0617074	33.9646	0.130998	2.43772	0.00230223	1.0811	0.00161053	76.8971	5.38605	0.0129853	0.000454853
178059	4	13.9504	0.0415836	15.0539	0.0479525	33.9348	0.106888	2.43253	0.00199854	1.07909	0.000795486	51.4795	3.41145	0.0223512	0.00204808
178059	5	13.9179	0.0320009	15.021	0.0393604	33.8883	0.0832362	2.43486	0.00173942	1.07925	0.00103051	54.7744	2.73495	0.022985	0.00163084
178059	6	13.8787	0.0410323	14.9777	0.0645051	33.8064	0.0896934	2.43586	0.00320653	1.07919	0.00342437	51.2981	0.612408	0.0211678	0.000926292
178059	7	13.9739	0.037826	15.0748	0.0293669	33.9939	0.0545898	2.43267	0.00349598	1.07878	0.00136017	73.5421	1.22662	0.0146401	0.000908056
178059	8	13.9282	0.0299292	15.0499	0.0381405	33.951	0.0455386	2.43757	0.00205431	1.08053	0.00114856	68.4441	1.99486	0.0155658	0.000334255
178059	9	13.9581	0.108471	15.0561	0.1297	33.9456	0.280021	2.43196	0.00366226	1.07866	0.0026297	48.7284	1.0054	0.0221218	0.000860362
178059	10	14.114	0.0784067	15.1789	0.066113	34.2661	0.150216	2.42783	0.00396245	1.07546	0.00197072	95.5962	1.45699	0.0111489	0.000727216
178059	11	13.928	0.0389801	15.0082	0.0443371	33.8474	0.0887634	2.43019	0.00243133	1.07756	0.00132567	46.8406	1.44348	0.0235262	0.00105909
178059	12	13.9633	0.0583853	15.0609	0.0886448	34.0039	0.156236	2.43522	0.00262048	1.0786	0.00262412	65.5368	1.87286	0.0148147	0.000952334
178059	13	13.9497	0.0586566	15.0386	0.0438837	33.9549	0.131016	2.43409	0.00159315	1.07806	0.00154832	51.4868	1.35518	0.0216828	0.00132647
178059	14	13.9933	0.0461248	15.0078	0.0481742	33.9067	0.107673	2.42308	0.00243985	1.0725	0.00107042	47.7344	1.73198	0.0257157	0.00112046
178059	15	13.8728	0.0753037	14.9817	0.0830205	33.7737	0.153289	2.43453	0.00557058	1.07993	0.000796591	46.7002	0.808817	0.0220825	0.000937436
178059	16	13.8723	0.0300962	14.9841	0.0304358	33.8195	0.0741967	2.43792	0.00179681	1.08015	0.00103861	55.9257	0.385769	0.0208839	0.000757363
178059	17	13.9964	0.00730828	15.0731	0.0199976	33.9813	0.016473	2.42786	0.00218495	1.07693	0.000891667	73.2827	1.59642	0.016204	0.000733546
178059	18	13.8982	0.0331246	14.9982	0.0354874	33.8483	0.0834395	2.43545	0.00160702	1.07915	0.000900602	55.8121	2.5901	0.021191	0.00140643
178059	19	14.0051	0.0721001	15.096	0.0742925	34.0288	0.162929	2.42975	0.00334561	1.07789	0.00112662	81.7166	2.53888	0.0128315	0.000831743
178059	20	13.9048	0.0683741	15.0135	0.0817846	33.8869	0.148278	2.43708	0.00298111	1.07973	0.00186554	61.4177	1.16138	0.0153491	0.000943081
178059	21	14.0132	0.0540031	15.1227	0.0360878	34.1779	0.0996351	2.439	0.00305057	1.07918	0.00199931	81.1449	1.59811	0.0124696	0.00119225
178059	22	13.9219	0.0614318	15.0566	0.0666244	33.9418	0.143956	2.43801	0.00243767	1.08151	0.00156127	60.8695	1.47416	0.0172307	0.00101571
178059	23	13.9663	0.0647511	15.0298	0.0750059	33.8987	0.165171	2.42718	0.00275682	1.07615	0.00168669	60.0135	1.56145	0.0170927	0.00048779
178059	24	13.862	0.0772065	14.9893	0.0750655	33.8248	0.176511	2.44012	0.0030533	1.08133	0.00152397	53.5843	1.55553	0.0204287	0.000636527
178059	25	13.9031	0.0416762	15.0197	0.039769	33.9413	0.0891449	2.44128	0.00287185	1.08032	0.00140814	73.581	3.75947	0.0132392	0.000261081
178059	26	13.9553	0.0418809	15.0704	0.0360239	34.0421	0.0931949	2.43938	0.00196324	1.07991	0.00124026	81.9794	3.25648	0.0126273	0.00107732
178059	27	13.9463	0.0391351	15.0432	0.0567407	33.9594	0.113652	2.43501	0.00347091	1.07865	0.00180721	72.8289	0.562274	0.013517	0.000400301
178059	28	13.8821	0.0946982	14.9997	0.09334	33.825	0.229798	2.4366	0.00377627	1.08052	0.0024319	40.8258	5.6741	0.0232909	0.00376387
178057	1	13.9748	0.0965471	15.1275	0.104406	34.0314	0.22695	2.43528	0.00382484	1.08252	0.00250579	51.7002	1.31184	0.0128143	0.000320968
178057	2	13.9356	0.0626634	15.06	0.0853961	33.8774	0.146005	2.4313	0.00449852	1.08186	0.0029922	43.1351	1.25511	0.0128496	0.000571972
178057	3	13.9821	0.10423	15.1346	0.106583	34.0137	0.244842	2.43279	0.0053014	1.08182	0.00278679	54.5488	2.76648	0.0106421	0.000576387
178057	4	13.9441	0.0472909	15.1099	0.0548312	33.9823	0.110722	2.43594	0.00471907	1.0815	0.00261402	46.0481	1.90961	0.0127139	0.000742289
178057	5	13.9824	0.132286	15.0622	0.153302	34.0138	0.324645	2.4327	0.0094481	1.07726	0.00543639	46.0717	1.59732	0.0143632	0.000784624
178057	6	13.9563	0.0947118	15.0912	0.0984356	33.9875	0.220436	2.43528	0.00468948	1.08128	0.00278701	56.8764	2.83385	0.0113309	0.000584793
178057	7	13.9833	0.0695138	15.1045	0.0760379	34.0203	0.153568	2.43303	0.00421808	1.08069	0.00211169	68.8254	4.13838	0.0105852	0.000835682
178057	8	13.9918	0.0920971	15.1286	0.0958625	34.0451	0.211841	2.43219	0.00387056	1.0813	0.00228302	62.7981	4.28372	0.0118393	0.000801547
178057	9	13.9537	0.0684418	15.1014	0.0672116	33.9754	0.155484	2.43495	0.00353291	1.08231	0.00226931	57.4872	2.04888	0.0115771	0.000596603
178057	10	13.9625	0.0721742	15.1219	0.0733081	34.0066	0.165578	2.43563	0.00271584	1.08307	0.00154446	82.3115	3.14728	0.00882907	0.000450797
178057	11	13.9881	0.16443	15.039	0.175307	34.0041	0.355596	2.43107	0.0117661	1.07521	0.00876385	47.83	0.557279	0.0125705	0.00073019
178057	12	13.9178	0.183496	15.0902	0.179996	33.9434	0.432269	2.43896	0.00754863	1.08435	0.00447171	56.744	1.60283	0.00986606	0.000437129
178057	13	13.9152	0.0623145	15.085	0.0769456	33.9385	0.1255	2.43907	0.0102177	1.08409	0.00456229	48.4155	0.29287	0.0134693	0.000461344
178057	14	13.957	0.0622137	15.1001	0.0670782	33.9479	0.140466	2.43241	0.00409474	1.08194	0.00251209	69.2123	1.27116	0.00938541	0.000237081
178057	15	13.9978	0.252658	15.1092	0.255768	33.9738	0.527427	2.42751	0.0120179	1.0795	0.00509487	49.2336	1.57237	0.0122438	0.00159733
178057	16	13.974	0.0882757	15.1348	0.110684	34.0039	0.215827	2.43268	0.00444031	1.08117	0.00310834	57.248	3.37825	0.0124252	0.000691407
178057	17	13.9325	0.0456998	15.0583	0.0512823	33.9579	0.109954	2.4374	0.00500552	1.08032	0.00220755	55.4871	2.94157	0.0118947	0.000796823
178057	18	13.9295	0.147902	15.0494	0.122232	33.8759	0.282478	2.43219	0.012789	1.08052	0.00646471	47.357	0.643075	0.0117184	0.00040046
178057	19	13.9179	0.0413636	15.0425	0.0466197	33.8599	0.0738076	2.43296	0.0053379	1.08085	0.00299136	52.5038	0.777804	0.0112858	0.000459637
178057	20	13.9361	0.0481735	15.0828	0.0466929	33.9388	0.103956	2.4354	0.00406894	1.08232	0.00200469	81.5845	0.857925	0.00769721	0.000247363
178057	21	14.0076	0.0868401	15.1173	0.0837916	34.0422	0.183299	2.43037	0.0039315	1.07927	0.00217567	82.6367	1.09208	0.00729437	0.00028923
178057	22	13.9814	0.0596183	15.1033	0.0631883	34.0254	0.135877	2.43369	0.00321024	1.08028	0.00218807	70.8089	2.29841	0.00871892	0.000435407
178057	23	13.9854	0.10986	15.0978	0.124725	34.0374	0.27153	2.43383	0.0087709	1.07955	0.00396156	50.3931	1.84296	0.0126548	0.000827854
178057	24	13.9637	0.070036	15.0774	0.066652	33.9351	0.144307	2.43042	0.00521602	1.07926	0.00231263	53.353	0.980025	0.0102221	0.000425094
178057	25	13.933	0.0501431	15.0787	0.0694523	33.9279	0.130768	2.43373	0.00530546	1.08124	0.00300128	54.3504	2.37491	0.0117119	0.000677502
178057	26	13.9553	0.0807344	15.0374	0.0759714	33.925	0.167499	2.43107	0.0060759	1.0776	0.00409188	66.0193	0.547654	0.0089277	0.000385206
178057	27	13.9536	0.0994946	15.0586	0.112731	33.9165	0.247454	2.43069	0.00772194	1.07923	0.00579722	60.626	1.09057	0.0112697	0.000964668
178057	28	13.9328	0.159655	15.0777	0.183323	33.9632	0.404377	2.43765	0.0085148	1.08216	0.00391073	47.2551	1.19678	0.0127846	0.000592553
178057	29	13.8729	0.171659	15.0542	0.127275	33.9696	0.373222	2.44871	0.00827553	1.08523	0.00585636	43.6903	0.364188	0.0117516	0.00124669
178057	30	13.9421	0.0762408	15.0792	0.0824818	33.9461	0.173722	2.43489	0.00413485	1.08159	0.0023043	50.5335	2.16624	0.0125352	0.000717983
178057	31	13.9272	0.137599	15.0416	0.139309	33.9094	0.329433	2.43495	0.0166405	1.08018	0.00994877	33.5228	1.0143	0.0187542	0.000850506
178057	32	13.9643	0.107176	15.0932	0.10059	33.9739	0.213555	2.4331	0.0066929	1.08092	0.00364087	47.1735	2.3657	0.0133793	0.00091579
169096	1	14.0461	0.102244	15.102	0.0877795	34.0572	0.230411	2.4247	0.0077918	1.07521	0.00492357	78.2646	1.29511	0.00664655	0.000383517
169096	2	14.0363	0.113127	15.1592	0.113785	34.2116	0.238176	2.43748	0.00687247	1.08003	0.00323299	70.1204	3.48581	0.00774322	0.000579371
169096	3	14.0352	0.118974	15.1047	0.110782	34.0535	0.292649	2.42634	0.00795751	1.07626	0.00402122	55.3983	0.729459	0.00834167	0.000307366
169096	4	13.9536	0.0477564	15.0613	0.0551039	33.9746	0.117425	2.435	0.00254606	1.07946	0.00124179	117.162	1.26094	0.00431829	0.00012349
169096	5	13.969	0.135576	15.0876	0.133944	33.9527	0.283118	2.4307	0.00676046	1.08012	0.00307267	52.5125	0.565141	0.00849795	0.000428448
169096	6	13.9853	0.0596615	15.0951	0.0648425	34.043	0.138467	2.43424	0.00313929	1.07937	0.00155786	80.3786	4.33707	0.0072532	0.000560003
169096	7	13.8977	0.188334	15.0059	0.176989	33.8664	0.390372	2.43698	0.00772045	1.0798	0.00293849	59.7747	0.889567	0.00908564	0.00044622
169096	8	13.9861	0.142079	15.1335	0.164334	34.1233	0.362445	2.43978	0.00467696	1.08203	0.00320434	78.2539	3.01546	0.00701411	0.000415114
169096	9	14.0494	0.128239	15.1356	0.147265	34.139	0.317009	2.42994	0.00434606	1.07731	0.00235663	101.769	2.19887	0.00535954	0.000270449
169096	10	14.0306	0.075559	15.1508	0.0795956	34.1837	0.182567	2.43638	0.00168607	1.07963	0.000798043	139.537	7.72626	0.00388524	0.000268628
169096	11	14.0288	0.116967	15.1113	0.144301	34.0475	0.295349	2.42696	0.00411977	1.07714	0.00207084	114.26	3.66258	0.00513185	0.000342459
169096	12	13.8911	0.0729254	15.0075	0.0629752	33.8757	0.160743	2.43873	0.00642267	1.08042	0.00348037	72.6618	0.434287	0.00712151	0.000284387
169096	13	14.0536	0.0656659	15.1438	0.0700008	34.1912	0.123168	2.43297	0.00553831	1.07759	0.00277777	97.2545	2.77871	0.00590173	0.000370796
169096	14	14.0367	0.132781	15.0785	0.148243	34.0042	0.306502	2.42257	0.00635097	1.07423	0.0040854	91.9166	1.92409	0.00554683	0.0003849
169096	15	13.9796	0.0769966	15.1094	0.0919149	34.0544	0.18938	2.43608	0.0128803	1.08085	0.00615105	66.5377	0.80491	0.00695394	0.000451379
169096	16	13.9116	0.166656	15.0444	0.211103	33.944	0.44484	2.43995	0.0100106	1.08138	0.00448361	61.8342	1.3579	0.00797239	0.00051856
169096	17	13.9613	0.068401	15.0587	0.0745102	33.9613	0.163974	2.43256	0.00474329	1.07862	0.00251136	73.2869	1.18672	0.007	0.000297682
169096	18	14.0345	0.137872	15.135	0.163081	34.1032	0.317186	2.43	0.0048398	1.07841	0.0040641	86.2856	2.53978	0.0057583	0.000311801
169096	19	13.9733	0.0798243	15.0913	0.084386	34.0243	0.205832	2.43494	0.00415368	1.08002	0.00275829	107.41	2.85689	0.00451188	0.000291106
169096	20	13.9619	0.0935615	15.0677	0.0959341	33.9967	0.234411	2.43495	0.00370313	1.07922	0.00230943	114.228	2.27528	0.00394742	0.00030868
169096	21	14.0381	0.112928	15.154	0.134154	34.1583	0.27507	2.43327	0.00509818	1.07947	0.00243846	89.8451	2.70947	0.00556746	0.00022953
169096	22	13.9613	0.0709832	15.0756	0.0890149	34.0235	0.179593	2.43705	0.00904711	1.07982	0.00404059	56.2303	0.496637	0.00836939	0.00036869
169096	23	14.0385	0.125576	15.1261	0.122595	34.1184	0.273027	2.43046	0.00879964	1.07753	0.00431049	78.091	3.42009	0.00568933	0.000586966
142815	1	13.624	0.0827642	14.7809	0.0940751	33.5369	0.171772	2.45837	0.0106983	1.08208	0.00613622	42.8362	1.11035	0.0370357	0.00131762
142815	2	13.7027	0.0887538	14.6877	0.0912463	33.485	0.169067	2.44424	0.0118063	1.07375	0.00690959	32.3364	0.744125	0.0446994	0.00251483
142815	3	13.6539	0.101487	14.7558	0.0986694	33.4959	0.242744	2.45456	0.00488671	1.07881	0.00312898	70.5491	3.69593	0.023225	0.00188459
142815	4	13.6698	0.134282	14.7111	0.146691	33.4204	0.298628	2.44523	0.00714621	1.07624	0.00390938	60.0748	3.22455	0.0234268	0.00122749
142815	5	13.6826	0.161754	14.7678	0.176523	33.5434	0.273188	2.45275	0.0253796	1.07979	0.0137234	36.4643	0.312276	0.0386938	0.00191464
142815	6	13.6491	0.136125	14.8111	0.167192	33.6393	0.302373	2.46506	0.0169165	1.0852	0.00756695	34.6699	0.76955	0.0501815	0.00188599
142815	7	13.5226	0.131794	14.6314	0.16735	33.3265	0.278089	2.46494	0.0216161	1.08212	0.0107315	34.5831	0.226575	0.0342912	0.00268001
142815	8	13.5933	0.182711	14.6573	0.20238	33.3824	0.376396	2.45641	0.0142742	1.07842	0.00810649	42.6945	1.9295	0.0341393	0.00165674
142815	9	13.6556	0.211214	14.7567	0.209966	33.5874	0.456858	2.46067	0.0175597	1.08112	0.00907916	31.7944	2.18841	0.0446358	0.00386218
142815	10	13.6168	0.156365	14.7094	0.134806	33.4372	0.335319	2.45603	0.00884236	1.08054	0.00496562	60.8118	0.895063	0.0246147	0.000987204
142815	11	13.5208	0.156316	14.6134	0.147598	33.2202	0.242461	2.45785	0.0217713	1.08118	0.0118633	39.5412	0.539769	0.0350191	0.00156792
142815	12	13.5686	0.166238	14.7466	0.180614	33.4254	0.349411	2.46281	0.0211437	1.08805	0.014874	22.3199	0.753419	0.0669327	0.00387749
142815	13	13.5589	0.129492	14.6553	0.0990912	33.2479	0.301943	2.45239	0.0155584	1.08116	0.00906519	44.4426	1.37271	0.0351395	0.0013745
142815	14	13.6234	0.242272	14.6869	0.285286	33.37	0.600451	2.44956	0.0204116	1.07811	0.0114936	37.9009	2.3884	0.0355755	0.0029927
142815	15	13.5658	0.202299	14.6809	0.177065	33.5496	0.391546	2.47501	0.035484	1.0885	0.0146587	26.6477	0.858598	0.0449045	0.00236467
142815	16	13.6687	0.283657	14.6418	0.198664	33.3923	0.644292	2.44474	0.0351895	1.07293	0.0205488	19.0275	0.766446	0.071659	0.00480676
142815	17	13.5198	0.177888	14.6823	0.170493	33.1489	0.283206	2.45307	0.0225108	1.08637	0.0106156	40.8235	1.47673	0.0330546	0.00164058
142815	18	13.5406	0.14828	14.6607	0.14532	33.3076	0.275037	2.46042	0.0155332	1.08296	0.00851559	40.8882	0.616256	0.0321833	0.00166269
142815	19	13.6659	0.218539	14.8554	0.210283	33.7452	0.324454	2.47123	0.0275049	1.08781	0.0153936	21.8922	0.666116	0.061096	0.00304491
142815	20	13.6381	0.224247	14.8081	0.247127	33.5985	0.488715	2.46443	0.015311	1.08602	0.00897884	31.2418	1.59166	0.0468915	0.00286958
142815	21	13.5371	0.151355	14.5681	0.113084	33.2477	0.320578	2.45681	0.0232314	1.07655	0.00923864	33.9658	2.23928	0.0229995	0.00183409
142815	22	13.6348	0.169879	14.6661	0.167899	33.3004	0.30114	2.44391	0.0302993	1.07617	0.0130278	25.163	0.461499	0.050081	0.00208512
142815	23	13.5322	0.096477	14.6428	0.103917	33.2692	0.229273	2.45859	0.00686971	1.08206	0.00413561	68.7378	4.33068	0.0214223	0.00160471
142815	24	13.6032	0.216838	14.701	0.296402	33.2529	0.645103	2.44423	0.0185348	1.08052	0.00727228	49.0924	3.60648	0.0266461	0.00184848
142815	25	13.4637	0.196307	14.5862	0.197103	33.2787	0.375717	2.47276	0.0197061	1.08389	0.0129762	31.5182	1.01074	0.0474761	0.0022986
142815	26	13.6282	0.108158	14.6559	0.0894136	33.297	0.156467	2.44402	0.0137279	1.07573	0.00707685	43.1915	0.308726	0.0315713	0.000950165
182316	1	13.7487	0.0881586	14.7567	0.0826337	33.3429	0.143734	2.42422	0.0102774	1.07174	0.00535681	37.8091	0.92855	0.0136901	0.000378024
182316	2	13.694	0.101379	14.7879	0.108542	33.4618	0.234874	2.44372	0.0060637	1.07994	0.0029302	48.5101	2.38347	0.010511	0.000531939
182316	3	13.6978	0.0657053	14.7918	0.073947	33.4378	0.159536	2.43978	0.00486451	1.07992	0.00318736	43.6939	1.20232	0.0113777	0.000537032
182316	4	13.7492	0.0901615	14.822	0.0899767	33.5263	0.202796	2.43862	0.00599151	1.07814	0.00324611	45.8631	2.09924	0.0120227	0.000682358
182316	5	13.8011	0.0805604	14.8924	0.0829444	33.615	0.174199	2.43588	0.00595566	1.07916	0.00332476	46.5291	2.91229	0.0108519	0.000746454
182316	6	13.7688	0.0788786	14.8487	0.0746482	33.5906	0.171453	2.4398	0.00512641	1.07854	0.00292008	49.3333	1.21545	0.0105984	0.000295187
182316	7	13.8265	0.143144	14.8531	0.132009	33.6566	0.298137	2.43462	0.00905218	1.07444	0.00436675	47.8887	1.7153	0.0116071	0.000572908
182316	8	13.707	0.0855331	14.7927	0.0821808	33.4768	0.165	2.44115	0.00660688	1.07934	0.00360739	37.723	1.67901	0.0134277	0.000753722
182316	9	13.6669	0.0568983	14.7639	0.0575343	33.3476	0.120247	2.44017	0.00525543	1.08034	0.00298049	41.4301	1.10683	0.0127525	0.000461526
182316	10	13.7217	0.0554694	14.7615	0.0553303	33.4161	0.122335	2.43539	0.00536591	1.07586	0.00320588	45.1703	0.830622	0.0105065	0.000401358
182316	11	13.7162	0.0952231	14.806	0.10183	33.5251	0.21056	2.44444	0.00638863	1.07952	0.00314778	45.2224	1.83985	0.0122172	0.000504208
182316	12	13.678	0.0663737	14.7777	0.0748954	33.4078	0.160317	2.44253	0.00536977	1.08046	0.00355021	44.5247	0.793885	0.0118444	0.000463581
182316	13	13.7318	0.0721937	14.7713	0.0688889	33.386	0.14566	2.43156	0.00694947	1.07581	0.00343738	43.1966	1.83785	0.0125096	0.000578388
182316	14	13.7619	0.0757599	14.815	0.0756245	33.5006	0.170756	2.43449	0.0066707	1.07663	0.00378819	39.0723	1.87904	0.0134352	0.00109249
182316	15	13.8058	0.0780804	14.8539	0.0906879	33.6129	0.188387	2.43475	0.00610883	1.07592	0.00235308	42.5005	1.05228	0.0125956	0.000465393
182316	16	13.7183	0.094413	14.8332	0.0988972	33.5125	0.215478	2.44305	0.00614608	1.07983	0.00352443	41.2725	2.01195	0.0135147	0.000677705
182316	17	13.6597	0.0587625	14.7488	0.0750087	33.3616	0.141574	2.43957	0.00744381	1.07846	0.0033871	40.3688	0.615032	0.0133512	0.000436153
182316	18	13.7181	0.0908432	14.792	0.0987811	33.4544	0.202679	2.43898	0.00788041	1.07836	0.0036907	40.0096	1.96166	0.0125521	0.0006096
182316	19	13.7694	0.0935119	14.8181	0.0858352	33.5569	0.199261	2.43737	0.00736926	1.07633	0.0036144	45.2532	2.32429	0.0106692	0.000721224
182316	20	13.7187	0.0746778	14.8037	0.081903	33.5144	0.170889	2.44447	0.00557708	1.07914	0.00316281	45.7866	1.77498	0.0102968	0.000485899
182316	21	13.7052	0.0949721	14.8073	0.109278	33.4888	0.231906	2.44484	0.00518511	1.08041	0.00286479	43.9669	1.81788	0.0123329	0.000598568
182316	22	13.7618	0.0743097	14.8439	0.0840347	33.5686	0.171633	2.43942	0.00662577	1.07871	0.00408454	44.2556	2.4323	0.0119295	0.000926991
182316	23	13.7228	0.0773112	14.7643	0.0971745	33.4479	0.213807	2.43745	0.010326	1.0759	0.00381787	43.8762	0.424324	0.0112003	0.00044966
182316	24	13.7459	0.0641222	14.8568	0.063224	33.62	0.137065	2.44598	0.00569392	1.0809	0.00313941	44.1594	1.04633	0.012155	0.000435057
182316	25	13.6284	0.0544255	14.7355	0.064023	33.3194	0.108491	2.44436	0.00690799	1.08007	0.00428806	36.7329	1.22282	0.0136242	0.000649007
182316	26	13.7323	0.0860125	14.8143	0.104437	33.515	0.207566	2.4407	0.0059921	1.07883	0.00421102	39.3108	2.27554	0.0132949	0.000807086
182316	27	13.7534	0.0754516	14.8483	0.0854167	33.5458	0.19232	2.43551	0.00619762	1.07806	0.00360843	41.7211	1.91147	0.01316	0.000716803
182316	28	13.682	0.0849228	14.8035	0.0941275	33.4653	0.197519	2.44474	0.00591952	1.08202	0.00321275	43.1594	1.68831	0.0120306	0.000495165
182316	29	13.6632	0.0626285	14.7483	0.0583724	33.3466	0.118337	2.44086	0.00639622	1.07951	0.00318798	44.4187	0.60708	0.0117552	0.000310543
182316	30	13.6439	0.0462429	14.7384	0.0499162	33.2941	0.104569	2.44168	0.00521574	1.08026	0.00270871	40.8733	0.317686	0.0127536	0.000309604
182316	31	13.7141	0.101954	14.7896	0.101436	33.4952	0.244622	2.44252	0.00603402	1.07855	0.00325546	46.9104	1.28136	0.0110219	0.000386291
182316	32	13.7008	0.0426894	14.8197	0.0556714	33.4744	0.0970961	2.44511	0.00758216	1.08173	0.00402279	40.2204	2.08243	0.0116369	0.000821806
182316	33	13.7792	0.112897	14.8256	0.126815	33.527	0.252386	2.4333	0.014031	1.07601	0.00795207	48.0191	0.785383	0.00869982	0.000830788
182316	34	13.8594	0.178892	14.9181	0.171571	33.7849	0.363438	2.43796	0.0113569	1.07651	0.00621297	40.7934	2.08322	0.0130627	0.000965016
182316	35	13.7321	0.0833747	14.801	0.08341	33.5044	0.185276	2.44004	0.00536212	1.07793	0.00292213	46.1524	2.86295	0.0120677	0.000623477
168974	1	13.8562	0.0328358	15.0002	0.0353575	33.7836	0.0789295	2.43816	0.000953307	1.08257	0.00054269	96.9007	2.15067	0.0113389	0.000416582
168974	2	13.8437	0.0449752	14.981	0.0468314	33.7398	0.107398	2.4372	0.00175349	1.08216	0.000957051	82.9772	3.60754	0.013669	0.000713455
168974	3	13.8172	0.0777852	14.9709	0.0885305	33.7124	0.181039	2.4399	0.00432738	1.0835	0.00350788	70.5925	0.54439	0.0150058	0.000669589
168974	4	13.8513	0.0647312	14.9933	0.0660428	33.7743	0.14943	2.43836	0.00173591	1.08245	0.000938734	71.4925	3.34981	0.0149413	0.00132963
168974	5	13.8406	0.0656972	14.9976	0.0702834	33.7818	0.157483	2.44079	0.0020089	1.0836	0.00100965	76.5238	2.57794	0.0148585	0.000961801
168974	6	13.8135	0.032758	14.9623	0.0334088	33.6942	0.0765259	2.43921	0.00096385	1.08317	0.000509771	79.2406	2.7702	0.0142674	0.000730018
168974	7	13.8915	0.0499851	15.0093	0.0531389	33.8002	0.122884	2.43316	0.00136921	1.08047	0.000637719	114.134	4.36008	0.0101413	0.000494435
168974	8	13.8421	0.070005	14.9985	0.0785384	33.7712	0.171641	2.43975	0.00169525	1.08354	0.000836908	72.2026	2.79924	0.0156049	0.00117811
168974	9	13.83	0.0800756	14.985	0.0823469	33.7326	0.19335	2.43909	0.00194253	1.08352	0.00101513	75.3831	1.23625	0.0149439	0.000475652
168974	10	13.8287	0.0332948	14.9763	0.0362482	33.7273	0.0782299	2.43894	0.00118092	1.08299	0.000564392	75.9146	1.88061	0.0149469	0.000693803
168974	11	13.8176	0.0587653	14.9727	0.0646551	33.7253	0.143267	2.44075	0.00125275	1.0836	0.000664482	75.8641	2.97848	0.0153164	0.000672738
168974	12	13.8316	0.0308038	15.0053	0.0419601	33.7472	0.0758229	2.43989	0.000957942	1.08389	0.000669827	74.3297	2.28524	0.0153451	0.000719275
168974	13	13.8359	0.0545037	14.988	0.0591879	33.7618	0.130737	2.44016	0.00129314	1.08327	0.000693719	74.1126	2.48892	0.0144553	0.000634001
168974	14	13.8325	0.0517932	14.9855	0.0500494	33.776	0.127349	2.44178	0.00258651	1.08336	0.00124948	69.2193	0.266952	0.0152244	0.000517686
168974	15	13.8502	0.0505428	14.9962	0.0538502	33.7796	0.125258	2.43891	0.00194477	1.08274	0.0011027	85.5432	1.16353	0.0130819	0.000292155
168974	16	13.8437	0.0440289	15.0017	0.0469345	33.7982	0.107213	2.44142	0.00146533	1.08365	0.000811776	83.4742	4.89594	0.0135904	0.0009133
168974	17	13.8165	0.0236181	14.9783	0.0289902	33.7375	0.0620426	2.44183	0.00149375	1.08409	0.00067664	73.4943	1.29046	0.0147103	0.000642379
168974	18	13.814	0.0384304	14.9719	0.0345609	33.7483	0.09802	2.44305	0.00228044	1.08382	0.001383	68.5928	0.604173	0.0137412	0.000739259
168974	19	13.8222	0.0348141	14.9692	0.0397515	33.7341	0.0883662	2.44057	0.00103693	1.08298	0.000598194	76.9243	3.08883	0.0139904	0.000716966
168974	20	13.8319	0.0422504	14.9798	0.0455882	33.7706	0.11566	2.44149	0.00200971	1.08298	0.00116926	65.246	1.89017	0.015963	0.000838011
168974	21	13.851	0.0319798	14.9929	0.0345573	33.7829	0.0737426	2.43902	0.00119734	1.08244	0.000549001	98.8616	6.97933	0.0112697	0.000937693
168974	22	13.8183	0.0486693	14.9775	0.0537999	33.7437	0.117265	2.44196	0.00125967	1.08389	0.000674098	90.8175	2.13733	0.0108574	0.000386927
199034	1	13.9216	0.157385	15.0347	0.196978	33.6968	0.367526	2.42092	0.0219556	1.08001	0.0088847	26.5469	0.527488	0.0411027	0.00205577
199034	2	13.8426	0.14912	14.9669	0.111339	33.3816	0.217232	2.41402	0.0229613	1.07979	0.0111585	15.9671	0.394357	0.0743205	0.00288713
199034	3	13.9076	0.148384	14.9509	0.190676	33.5263	0.214037	2.41179	0.0189702	1.07578	0.0169351	16.5602	0.520926	0.0750684	0.00379069
199034	4	13.8471	0.227263	14.8693	0.215755	33.4958	0.318858	2.42151	0.0378392	1.07515	0.0224524	15.3259	0.351873	0.0683119	0.00217773
199034	5	13.7837	0.142497	14.8878	0.168085	33.5153	0.34861	2.4319	0.0225296	1.08039	0.0138517	22.8577	0.627894	0.0515454	0.0019972
199034	6	13.7162	0.305387	14.8824	0.249277	33.5057	0.24232	2.44647	0.0501827	1.08604	0.0198847	14.4763	0.176067	0.070768	0.00285278
199034	7	13.8961	0.187926	14.9736	0.176422	33.6008	0.237652	2.41971	0.0329289	1.07803	0.0137444	20.3362	0.342829	0.0557408	0.00186442
199034	8	13.8245	0.178386	14.9296	0.181279	33.6384	0.213102	2.4343	0.0289236	1.08037	0.0163716	22.3632	0.398405	0.0544221	0.00180938
199034	9	13.8221	0.284453	14.8635	0.312027	33.4358	0.352227	2.42296	0.0445141	1.07658	0.0230922	12.8326	0.321866	0.0837801	0.00504852
199034	10	13.8392	0.405014	14.9298	0.208694	33.3508	0.365595	2.41484	0.0730277	1.08127	0.0366712	12.4996	0.223471	0.0871442	0.00311492
224332	1	14.0404	0.326944	15.1007	0.360669	34.0276	0.821049	2.424	0.0185501	1.07572	0.010695	32.8518	8.98406	0.149671	0.0121448
224332	2	13.9313	0.22843	14.9862	0.270369	33.8329	0.544142	2.42888	0.011664	1.07524	0.00730233	52.5098	16.8429	0.0800166	0.0129994
224332	3	13.9702	0.305742	15.0203	0.297891	33.9202	0.714205	2.42724	0.0126555	1.07519	0.00943743	36.2212	4.7503	0.118096	0.00849312
224332	4	13.9668	0.282824	15.0274	0.337633	33.8753	0.68348	2.42543	0.015759	1.07616	0.00894642	39.1039	9.63049	0.110017	0.00598619
224332	5	13.896	0.277191	14.9623	0.296354	33.7404	0.66694	2.42807	0.0119047	1.07674	0.00809599	51.2911	6.59605	0.061488	0.00876166
224332	6	13.998	0.31389	15.061	0.397863	34.0014	0.872137	2.42758	0.0187537	1.0753	0.00935292	35.3812	11.6507	0.110422	0.0154766
224332	7	13.9586	0.269987	14.9995	0.324088	33.8622	0.666604	2.42591	0.0175949	1.07456	0.00936666	38.0141	9.4596	0.0955015	0.0109352
224332	8	13.961	0.261787	14.9952	0.236717	33.9567	0.558642	2.43229	0.01293	1.0741	0.00704593	54.0617	2.78254	0.0645808	0.00255887
224332	9	13.9734	0.277751	15.0126	0.305195	33.9634	0.665697	2.43033	0.019416	1.07469	0.0101185	33.8424	8.63706	0.115913	0.00898632
224332	10	14.0443	0.49629	15.1102	0.507908	34.1892	1.14566	2.43445	0.0257142	1.07593	0.0137642	26.2514	2.82549	0.0978459	0.0118702
224332	11	13.9409	0.278081	14.9766	0.304256	33.8113	0.644829	2.42573	0.0138312	1.0743	0.00928037	40.3584	10.7287	0.0553255	0.0156706
224332	12	13.9506	0.338201	15.0086	0.330286	33.862	0.7741	2.42731	0.0139664	1.07586	0.00607964	73.9476	7.29683	0.0560721	0.00240089
224332	13	13.9356	0.254981	14.9838	0.26845	33.7957	0.60885	2.42471	0.0152056	1.07523	0.00795345	41.5728	12.3084	0.0734368	0.0134317
224332	14	13.9166	0.301038	14.9713	0.306312	33.7558	0.701892	2.42559	0.0140322	1.07579	0.0051467	51.2273	5.99928	0.0791929	0.004987
224332	15	13.9575	0.380424	14.9892	0.400576	33.793	0.904572	2.42114	0.0104144	1.07392	0.00452048	43.66	2.40871	0.0822019	0.00482904
224332	16	13.9738	0.330625	14.9885	0.343324	33.8151	0.650819	2.41999	0.0288928	1.07264	0.0137756	31.3425	2.92241	0.0775881	0.00599244
224332	17	14.0145	0.433638	15.0471	0.528464	34.0748	1.11614	2.43139	0.0209744	1.07366	0.0108054	37.1643	3.14781	0.0681079	0.00731977
224332	18	14.0344	0.387082	15.0816	0.414913	34.0657	0.9261	2.42731	0.00958449	1.07462	0.00378424	59.7358	11.1266	0.0707491	0.00811365
224332	19	13.9964	0.277148	15.0478	0.286655	33.95	0.607185	2.42569	0.0271067	1.07503	0.0120795	29.2035	3.87795	0.113105	0.00689845
224332	20	13.9682	0.272922	15.0173	0.295705	33.922	0.630147	2.42855	0.0197162	1.07512	0.0111986	30.5215	3.6982	0.105972	0.0105173
224332	21	14.0307	0.39017	15.0613	0.424674	34.0261	0.944729	2.42514	0.0165538	1.07346	0.00989777	31.3573	1.24101	0.122785	0.00614101
224332	22	14.0479	0.25227	15.1177	0.270567	34.109	0.595119	2.42807	0.0171864	1.07617	0.00870317	39.8379	4.41337	0.114688	0.00763393
224332	23	13.9517	0.296268	14.9922	0.31117	33.8357	0.697094	2.42521	0.0125457	1.07458	0.00738888	50.6652	18.0413	0.0750022	0.0136942
224332	24	13.9476	0.252405	14.9928	0.270988	33.8513	0.603186	2.42705	0.0139458	1.07521	0.00865311	43.7905	10.2608	0.0826136	0.00607193
224332	25	13.9449	0.251136	15.0214	0.234904	33.9144	0.515877	2.43207	0.0170235	1.07721	0.00700866	53.1177	1.45303	0.0765854	0.00328866
224332	26	14.0192	0.619204	15.1035	0.684332	34.0135	1.43417	2.42627	0.0193995	1.07735	0.01369	26.2182	1.24579	0.157122	0.00998667
224332	27	13.9391	0.246666	14.9902	0.248679	33.8173	0.522136	2.42611	0.0159319	1.07542	0.00763658	48.3185	7.2068	0.0789953	0.00474524
224332	28	13.9931	0.553441	15.0791	0.556873	33.9994	1.2824	2.42977	0.0174628	1.07764	0.0118348	39.5074	1.10405	0.0999073	0.00801988
224332	29	13.998	0.335469	15.0548	0.301489	33.9989	0.737251	2.42648	0.0159122	1.07512	0.0077355	47.9812	17.6849	0.0830581	0.0130858
224332	30	14.0375	0.51628	15.0825	0.516418	34.0644	1.1762	2.42673	0.0192497	1.07448	0.0112177	30.6295	3.3213	0.0861556	0.00725991
224332	31	13.9998	0.391877	15.0557	0.423579	33.9686	0.941731	2.42602	0.0158831	1.07542	0.00805723	41.295	14.7829	0.085779	0.0203085
224378	1	13.604	0.216238	14.7422	0.210077	33.3936	0.453165	2.45473	0.0171412	1.08392	0.0083776	43.09	9.10791	0.0261421	0.00538087
224378	2	13.6077	0.142357	14.7406	0.191663	33.4168	0.426913	2.45573	0.0152169	1.08326	0.00936055	36.8278	1.01558	0.0300196	0.00225161
224378	3	13.6018	0.306326	14.7305	0.303214	33.4043	0.659494	2.45591	0.0131497	1.083	0.00758986	66.1511	5.13482	0.0196199	0.00161161
224378	4	13.5565	0.194903	14.7073	0.252312	33.3095	0.518132	2.45708	0.0169832	1.08488	0.00942131	33.985	2.15187	0.0313939	0.0039128
224378	5	13.5653	0.1944	14.7138	0.203862	33.3116	0.464838	2.45565	0.0133382	1.08412	0.00619283	57.4398	10.9199	0.0194158	0.00513397
224378	6	13.6022	0.196204	14.737	0.22116	33.3921	0.451824	2.45491	0.0100087	1.08343	0.00645456	60.7538	5.18239	0.0204586	0.00227213
224378	7	13.5475	0.204491	14.6796	0.224838	33.2445	0.490414	2.45392	0.00893856	1.08357	0.00413811	79.5991	8.85253	0.0154397	0.00210173
224378	8	13.5555	0.164035	14.6945	0.177095	33.3051	0.394892	2.45694	0.00860361	1.08402	0.00407066	71.4357	6.78315	0.015638	0.00267259
224378	9	13.5707	0.252242	14.7246	0.275277	33.342	0.61784	2.45662	0.0116608	1.0852	0.00612449	57.8473	23.3565	0.0232901	0.00842469
224378	10	13.5411	0.182983	14.6881	0.188335	33.2688	0.430319	2.45688	0.00732854	1.08471	0.00420058	81.1646	12.4451	0.0174803	0.00165181
224378	11	13.5428	0.186746	14.6929	0.250947	33.2802	0.499931	2.4574	0.012404	1.08491	0.00830256	46.4173	1.34868	0.0289796	0.00273153
224378	12	13.5456	0.164214	14.6852	0.159192	33.2805	0.399922	2.45693	0.0105688	1.08414	0.00591101	80.7192	1.76115	0.0205846	0.00232101
224378	13	13.5884	0.23067	14.7284	0.276612	33.3727	0.539234	2.45599	0.0167003	1.0839	0.00971373	46.7841	3.10681	0.0279238	0.00222043
224378	14	13.5917	0.304334	14.732	0.317924	33.3809	0.732849	2.45599	0.0130901	1.0839	0.0072393	56.3022	14.0299	0.0213359	0.00652332
224378	15	13.5729	0.248261	14.7258	0.288571	33.3433	0.60198	2.45547	0.0127282	1.08443	0.00583146	53.4875	13.4366	0.0212096	0.00557795
224378	16	13.5864	0.303475	14.7285	0.320792	33.4062	0.733343	2.45881	0.0139708	1.08407	0.00725225	46.0407	18.1143	0.025916	0.00909001
224378	17	13.5604	0.188475	14.7036	0.213608	33.3114	0.460006	2.45653	0.00854369	1.08445	0.00448878	83.566	27.9366	0.0156763	0.00502368
224378	18	13.5759	0.252807	14.717	0.291435	33.3341	0.598317	2.45509	0.0118619	1.08458	0.00816181	42.2475	11.3272	0.0278861	0.00657235
224378	19	13.5519	0.244966	14.7035	0.256143	33.3009	0.58038	2.45727	0.0100915	1.08496	0.00494494	75.1581	20.9236	0.0133758	0.00457941
224378	20	13.6308	0.230189	14.7544	0.27381	33.4389	0.561791	2.45321	0.0184157	1.08244	0.00958928	35.9079	13.2126	0.0299072	0.00980438
224378	21	13.5632	0.221999	14.7151	0.246954	33.3167	0.567163	2.4564	0.0125359	1.08468	0.0087109	44.5444	7.3562	0.0239982	0.00373904
224378	22	13.5561	0.23414	14.7098	0.254107	33.3164	0.556955	2.45768	0.0137586	1.08527	0.00578029	51.5366	16.6753	0.0196894	0.00632911
178058	1	13.84	0.0572954	14.9499	0.0592274	33.7582	0.133511	2.43919	0.00500214	1.0802	0.00242535	40.3786	1.31136	0.0465772	0.00077747
178058	2	13.7738	0.0406803	14.8692	0.0375733	33.6298	0.0823349	2.44163	0.00328198	1.07956	0.00196211	41.3408	1.30302	0.0448196	0.00215624
178058	3	13.8099	0.0295345	14.8973	0.0275885	33.6865	0.0648793	2.43931	0.00255076	1.07875	0.00141331	52.7975	2.07178	0.0414509	0.00126062
178058	4	13.8885	0.0584237	14.9204	0.0495814	33.7739	0.115032	2.43514	0.00252034	1.07608	0.00141726	45.4535	3.13569	0.0460968	0.00201608
178058	5	13.8246	0.0396749	14.8907	0.0483503	33.6982	0.109803	2.43964	0.00310751	1.07804	0.00141139	52.865	4.30763	0.0381017	0.00230075
178058	6	13.7605	0.0589482	14.8694	0.0649496	33.5918	0.126466	2.4412	0.00427621	1.0806	0.00283667	37.7453	1.0997	0.0438582	0.000953502
178058	7	13.7741	0.0250747	14.8408	0.0361785	33.5759	0.0628878	2.43803	0.00366788	1.07839	0.00178194	39.8775	1.46936	0.0435995	0.00058278
178058	8	13.7621	0.0334448	14.8621	0.0368801	33.5967	0.0722212	2.44129	0.00287062	1.07995	0.00174601	43.5299	0.93543	0.0435186	0.0018743
178058	9	13.7607	0.0299046	14.8545	0.0335225	33.5931	0.0653585	2.44199	0.00247176	1.07949	0.00130841	42.6597	1.41628	0.0450725	0.00184545
178058	10	13.8089	0.0604973	14.8996	0.0644821	33.6916	0.119579	2.43988	0.00424644	1.07899	0.00213877	48.7123	0.559196	0.0412264	0.00161152
178058	11	13.8245	0.0678758	14.9367	0.0765534	33.7311	0.183334	2.43994	0.00478735	1.08047	0.00255486	44.5138	2.1346	0.0445367	0.00329424
178058	12	13.8782	0.0661351	14.9244	0.0727999	33.8303	0.166331	2.43765	0.00280958	1.07538	0.0018149	51.7121	3.63686	0.0373295	0.0037129
178058	13	13.8737	0.0750554	14.9176	0.0663553	33.7432	0.135756	2.43221	0.00638528	1.07526	0.00304028	57.5867	3.45455	0.0329736	0.00255724
178058	14	13.8402	0.0375534	14.8979	0.0399922	33.7207	0.0956225	2.43644	0.00245203	1.07643	0.00162473	45.9765	2.94272	0.0396021	0.00227374
178058	15	13.7538	0.026632	14.8516	0.0276488	33.5625	0.0625034	2.44025	0.00137897	1.07982	0.00081657	100.848	4.12039	0.0196148	0.00107902
178058	16	13.812	0.0493858	14.8743	0.051664	33.6286	0.113615	2.43477	0.00311067	1.07693	0.0015754	52.8702	3.82089	0.0339901	0.00222723
178058	17	13.7576	0.0498981	14.8316	0.0551005	33.5968	0.108665	2.44209	0.00466086	1.07808	0.00304268	32.5675	0.846098	0.0507535	0.00272065
178058	18	13.8092	0.0489262	14.9162	0.0508387	33.7124	0.115128	2.44131	0.00255923	1.08018	0.00138781	51.0103	2.5542	0.0409682	0.00240954
178058	19	13.8095	0.0809636	14.8941	0.090571	33.6949	0.195807	2.43999	0.00294594	1.07855	0.00271598	53.1566	2.15385	0.0341544	0.00128681
178058	20	13.7646	0.0622224	14.8464	0.071508	33.5523	0.157518	2.43759	0.00675465	1.07861	0.00411619	35.2913	1.2104	0.0543156	0.00378709
178058	21	13.8111	0.0364838	14.9147	0.0397848	33.708	0.0881395	2.44065	0.00242008	1.07991	0.00135772	62.1528	4.54257	0.0341207	0.00298811
178058	22	13.7305	0.0282973	14.8442	0.0316243	33.5621	0.0545887	2.44439	0.00325558	1.08112	0.00166619	34.8427	0.5309	0.0529268	0.00247345
178058	23	13.7895	0.0342903	14.8933	0.0329629	33.665	0.0746256	2.44137	0.0022254	1.08006	0.00116953	50.7441	2.10368	0.0411225	0.00201891
178058	24	13.8245	0.0466695	14.9233	0.0488488	33.7305	0.108855	2.43992	0.00234183	1.07949	0.00128415	49.8337	3.06526	0.0411946	0.00322162
178058	25	13.8272	0.045136	14.8624	0.0570742	33.6823	0.146952	2.43596	0.0131176	1.07487	0.00534896	59.1462	1.38926	0.0358639	0.000740578
178058	26	13.8242	0.0654304	14.9243	0.0668617	33.7518	0.150162	2.44153	0.00176047	1.07959	0.00133757	51.2625	3.75156	0.0409631	0.00271616
178058	27	13.8809	0.0393871	14.8667	0.0260308	33.7473	0.0679033	2.43127	0.00340992	1.07162	0.00247281	48.183	1.4461	0.035186	0.00179948
178058	28	13.7784	0.0310872	14.8617	0.0316572	33.61	0.0701562	2.43934	0.00248007	1.07863	0.000888065	50.2503	2.50335	0.0384863	0.00134758
178058	29	13.8509	0.0589201	14.9279	0.0650936	33.7678	0.155579	2.43795	0.00194409	1.07776	0.00194763	63.8313	1.18777	0.0326337	0.000827699
178058	30	13.7404	0.0217114	14.8339	0.0270658	33.5419	0.052074	2.44113	0.00310521	1.07959	0.00157298	46.2967	1.12412	0.0355954	0.00176498
178058	31	13.7986	0.097554	14.8393	0.101765	33.6104	0.24732	2.43579	0.00514779	1.07544	0.00219711	38.3383	0.926557	0.0513122	0.00153072
178058	32	13.7999	0.0253464	14.8629	0.024994	33.6323	0.0516066	2.43717	0.00306897	1.07704	0.0017156	46.1003	0.871458	0.0358291	0.00242725
178058	33	13.7692	0.0400353	14.8643	0.0503754	33.5902	0.102506	2.43953	0.00256991	1.07954	0.00177652	47.6989	1.77576	0.0345922	0.00163255
178058	34	13.7566	0.0330708	14.8423	0.0381848	33.5508	0.0771008	2.43891	0.00241075	1.07893	0.00150151	44.085	2.13425	0.0367279	0.00140448
178058	35	13.8549	0.0476248	14.8989	0.0422703	33.7336	0.0870428	2.43387	0.00341673	1.0754	0.00247178	36.9978	1.78887	0.0456306	0.00106151
178058	36	13.8193	0.054224	14.9226	0.0668939	33.7483	0.146867	2.44211	0.00315691	1.07983	0.00136855	54.2512	1.61417	0.0302725	0.00077291
207526	1	13.8325	0.0834138	14.8965	0.0751241	33.5798	0.148711	2.42809	0.00909193	1.07716	0.00523954	34.6068	1.13451	0.0434276	0.00165123
207526	2	13.7829	0.0496104	14.9157	0.0658198	33.5642	0.113712	2.43536	0.00693125	1.08225	0.00421098	50.5561	1.82908	0.0276302	0.00114383
207526	3	13.7974	0.0742085	14.8778	0.0749834	33.583	0.163428	2.43428	0.00861299	1.07845	0.00467866	41.7405	1.66777	0.0308904	0.00138359
207526	4	13.7457	0.0841943	14.8763	0.0729909	33.4586	0.14799	2.4347	0.0109431	1.08256	0.00608544	29.2011	0.650494	0.0394609	0.00132341
207526	5	13.7995	0.0677611	14.9232	0.0680358	33.5867	0.144239	2.43409	0.00550534	1.08151	0.00290073	63.2706	2.61519	0.0215609	0.00142376
207526	6	13.8291	0.0641012	14.931	0.0679489	33.5738	0.122394	2.43009	0.00593503	1.07974	0.00291282	56.5728	2.30309	0.0284246	0.0016537
207526	7	13.7469	0.068032	14.8842	0.0655085	33.515	0.131649	2.43778	0.00780954	1.08271	0.0043521	43.6029	1.67433	0.0305647	0.00139384
207526	8	13.881	0.0876566	15.0043	0.116471	33.7075	0.149384	2.42894	0.0171983	1.0811	0.00870394	25.9642	0.968543	0.0522085	0.00268993
207526	9	13.7695	0.0652148	14.9091	0.0671522	33.5388	0.134809	2.43592	0.00618562	1.08285	0.00362613	48.8976	2.06031	0.0261293	0.000739902
207526	10	13.8081	0.0468171	14.9116	0.04573	33.6024	0.104929	2.43362	0.00467309	1.08077	0.00276959	70.501	3.67046	0.0202413	0.00119943
207526	11	13.7396	0.05615	14.899	0.061226	33.4917	0.113217	2.43782	0.00690534	1.08446	0.0035503	45.4633	1.25442	0.0303051	0.00145947
207526	12	13.8171	0.0786356	14.9519	0.0961847	33.6467	0.18128	2.43464	0.00721119	1.08041	0.00383047	44.3891	2.05298	0.0343175	0.00174657
207526	13	13.7839	0.0620684	14.9042	0.0616664	33.5203	0.128339	2.43221	0.010259	1.08136	0.00466659	37.9996	1.91978	0.038197	0.00233843
207526	14	13.8272	0.0843456	14.9641	0.085221	33.6506	0.172661	2.43248	0.00611473	1.08235	0.00398261	48.0165	2.03851	0.0331622	0.00194059
207526	15	13.8818	0.107726	14.8624	0.119948	33.489	0.191596	2.41282	0.0117948	1.0707	0.00525423	35.6899	0.834964	0.0299208	0.000806553
207526	16	13.8195	0.0510921	14.9401	0.0538908	33.6208	0.0908985	2.43306	0.0060672	1.08117	0.00353062	50.7162	1.86338	0.0250248	0.0013534
207526	17	13.8085	0.111718	14.875	0.123411	33.5205	0.161355	2.42826	0.0143163	1.07751	0.00892836	33.1968	0.734677	0.0354521	0.00137325
207526	18	13.8388	0.0632286	14.9071	0.0671904	33.5988	0.13362	2.42803	0.00574641	1.07726	0.00309166	57.9736	2.38852	0.0193534	0.000937351
207526	19	13.7945	0.0508341	14.8603	0.0554501	33.4922	0.125759	2.43056	0.00703273	1.07923	0.00335161	45.5325	1.59567	0.0204767	0.00123979
207526	20	13.8262	0.0832764	14.8927	0.0995153	33.5543	0.213345	2.42689	0.0071816	1.07715	0.00420841	55.1657	1.57078	0.0251094	0.00100504
207526	21	13.8003	0.0781944	14.9418	0.0840385	33.5424	0.143794	2.42775	0.0126097	1.08141	0.00608972	25.656	1.20507	0.0462045	0.00272196
207526	22	13.8885	0.127427	14.9574	0.130961	33.6449	0.230721	2.4228	0.0124731	1.07707	0.00699895	39.7776	1.22256	0.0373735	0.000704426
207526	23	13.8145	0.0715648	14.9112	0.0814266	33.5919	0.161487	2.43182	0.0071879	1.07947	0.00428698	42.6067	2.10298	0.0297981	0.00153913
207526	24	13.8036	0.0572174	14.9318	0.0631281	33.5536	0.117474	2.43092	0.00496899	1.08178	0.00303353	58.7226	1.47902	0.0249118	0.000542496
207526	25	13.8301	0.0706612	14.9613	0.074485	33.6301	0.137063	2.432	0.00846975	1.08192	0.00454094	41.9373	1.12373	0.0269857	0.000999936
207526	26	13.8409	0.100049	14.9974	0.123909	33.7104	0.214831	2.43587	0.00713769	1.08353	0.00387416	44.6255	1.20277	0.0286302	0.00197953
207526	27	13.7783	0.11018	14.864	0.120983	33.4469	0.237137	2.42806	0.0113902	1.07901	0.00618553	27.6551	0.588973	0.0380574	0.00146654
207526	28	13.8441	0.0786375	14.9374	0.0764941	33.6745	0.166083	2.43119	0.00632405	1.0791	0.00375369	44.9228	1.8682	0.026378	0.00134322
207526	29	13.8255	0.0807195	14.9592	0.0861143	33.6832	0.169779	2.43658	0.00705194	1.08213	0.00446355	52.1874	2.45654	0.0266507	0.00159551
207526	30	13.868	0.0736086	14.986	0.0800357	33.75	0.1691	2.43094	0.00660011	1.07943	0.00384267	51.3458	2.16256	0.0258384	0.00184149
207526	31	13.8234	0.0960905	14.9099	0.0909602	33.5747	0.177435	2.42943	0.0104563	1.07892	0.00646927	28.6336	0.961158	0.0426843	0.00203859
207526	32	13.861	0.0815772	14.9814	0.0691119	33.7316	0.148613	2.43415	0.00668539	1.08121	0.00385294	49.8194	1.59678	0.0289411	0.00129445
207526	33	13.858	0.0981662	14.9732	0.110521	33.6571	0.213076	2.42907	0.00854194	1.08062	0.00548059	37.3333	1.4425	0.0367886	0.00172059
179669	1	14.0905	0.0711044	15.0618	0.0619748	33.7331	0.129022	2.39662	0.00340099	1.07015	0.00175277	32.7997	1.71023	0.0525497	0.0015884
179669	2	14.1081	0.0505949	15.0544	0.0500944	33.6836	0.103687	2.38655	0.00419022	1.06712	0.00252489	27.6958	1.2635	0.0505252	0.00243054
179669	3	14.1133	0.100965	15.0562	0.105881	33.8992	0.256908	2.39923	0.00419312	1.06685	0.00392242	41.5249	0.962946	0.0324029	0.00144497
179669	4	14.1636	0.0684676	15.079	0.0788317	33.8784	0.151813	2.39203	0.00519784	1.06466	0.00303489	26.0242	0.902548	0.0534217	0.00229467
179669	5	14.0701	0.0815745	15.0075	0.0751008	33.6788	0.170837	2.3937	0.00683086	1.06665	0.00352733	48.0584	0.970039	0.0282691	0.00128916
179669	6	14.1798	0.159919	15.0466	0.206727	33.8379	0.421099	2.38637	0.0143132	1.06111	0.00672827	12.3939	0.317795	0.10399	0.00514045
179669	7	14.0229	0.110234	14.9967	0.117756	33.5998	0.242363	2.39617	0.00638444	1.06946	0.00244935	31.4986	1.14709	0.0418367	0.0012903
179669	8	14.0417	0.0867631	15.025	0.0914116	33.6823	0.201038	2.39881	0.00393316	1.07007	0.00231408	30.6558	1.20967	0.0461539	0.00225378
179669	9	14.129	0.11257	15.0081	0.101026	33.7999	0.300753	2.39316	0.00712037	1.05641	0.0110317	37.4491	0.652803	0.0307186	0.00106667
179669	10	14.0398	0.0793069	15.0069	0.0944958	33.6282	0.216782	2.39518	0.00476574	1.06888	0.00223567	35.6331	0.309138	0.0428337	0.000991036
179669	11	14.1612	0.104914	15.0381	0.0920642	33.7872	0.220602	2.38598	0.00695971	1.06198	0.00464935	37.0321	0.501207	0.040869	0.00129794
179669	12	14.0961	0.0577751	15.0801	0.0661951	33.768	0.12953	2.39561	0.00515454	1.06983	0.00325734	27.3193	0.218504	0.0521561	0.00123184
179669	13	14.0663	0.115554	15.02	0.135237	33.6235	0.282427	2.39037	0.00544698	1.0678	0.00407258	28.0093	0.665574	0.0530787	0.00122358
179669	14	14.0262	0.157375	15.0242	0.169185	33.6135	0.355467	2.39655	0.00506627	1.07117	0.00310089	29.1587	1.92266	0.0518942	0.00289663
179669	15	14.0238	0.0733143	15.0031	0.076497	33.6388	0.178106	2.39871	0.00531805	1.06985	0.00266011	34.3051	0.640701	0.0395809	0.00110311
179669	16	14.0928	0.0763317	15.0646	0.0805583	33.7839	0.162035	2.39747	0.00709322	1.06905	0.0039147	20.8733	0.936116	0.064148	0.00311807
179669	17	14.1651	0.109376	15.0255	0.108932	33.8043	0.249626	2.38655	0.00542307	1.06081	0.00286897	34.439	0.801737	0.034034	0.00101253
104964	1	13.8304	0.0726701	14.9323	0.0917523	33.5494	0.194721	2.42575	0.00354677	1.07967	0.00173609	55.8013	1.14704	0.0309811	0.00129653
104964	2	13.7448	0.092043	14.8221	0.0941721	33.3056	0.227429	2.42313	0.00230733	1.07838	0.00139285	57.3461	0.5008	0.0301319	0.00126795
104964	3	13.73	0.0340639	14.8066	0.0370228	33.2867	0.082234	2.42439	0.00145349	1.07842	0.000716378	58.7165	1.76816	0.0304895	0.00156522
104964	4	13.7729	0.0486426	14.8576	0.0522243	33.4121	0.1195	2.42593	0.00322051	1.07876	0.00191601	55.9984	0.630126	0.0292117	0.00134134
104964	5	13.6921	0.0578524	14.7739	0.044198	33.2167	0.107978	2.426	0.00394301	1.07902	0.00203369	58.2176	0.711439	0.0288983	0.000765947
104964	6	13.683	0.107326	14.7601	0.098191	33.1484	0.217721	2.42263	0.00339846	1.07874	0.00168179	50.4998	1.51768	0.0310647	0.000824631
104964	7	13.7012	0.033672	14.778	0.0360051	33.2174	0.0735262	2.42443	0.00156096	1.0786	0.000896602	58.8304	0.93688	0.0298748	0.00106902
104964	8	13.7594	0.0821641	14.8434	0.0840476	33.3521	0.198802	2.42396	0.00207227	1.07879	0.000871617	59.001	3.02811	0.0297248	0.00204744
104964	9	13.7261	0.0531497	14.8039	0.0690184	33.2792	0.167656	2.42451	0.00517783	1.07852	0.00280933	52.3409	0.571137	0.0308277	0.000915722
104964	10	13.735	0.114392	14.7553	0.0815999	33.1415	0.182852	2.41305	0.0100504	1.07434	0.00401357	50.8424	0.78496	0.0304988	0.000806358
104964	11	13.674	0.0350094	14.7595	0.0335271	33.1985	0.0660385	2.42788	0.00327839	1.07939	0.00205837	54.5197	0.698404	0.0300195	0.00131776
104964	12	13.6482	0.0493847	14.7269	0.0600936	33.1514	0.125163	2.42899	0.00372512	1.07904	0.00193375	48.952	1.00545	0.0295176	0.000454453
104964	13	13.6636	0.0486079	14.7467	0.0406481	33.1575	0.0755343	2.42674	0.00423712	1.07928	0.00170858	53.3909	0.529384	0.0300294	0.0012713
104964	14	13.6983	0.0644888	14.7942	0.07106	33.2603	0.146007	2.42806	0.00165748	1.08	0.000957022	60.0952	1.50733	0.0284971	0.00168901
104964	15	13.6604	0.0372937	14.7358	0.0505906	33.1372	0.10412	2.42578	0.00248037	1.07872	0.00151428	53.4239	0.510816	0.0287444	0.000898405
104964	16	13.662	0.0695353	14.7331	0.094176	33.1602	0.210216	2.42716	0.00451125	1.07839	0.00169504	49.3111	0.431007	0.030664	0.000981597
104964	17	13.7685	0.0489973	14.8283	0.0531829	33.3649	0.119692	2.42328	0.00374136	1.07698	0.00175491	59.66	0.892699	0.0279461	0.0010362
104964	18	13.6779	0.0261392	14.7695	0.0469313	33.2367	0.0806044	2.42995	0.00188397	1.07981	0.00193518	53.7814	0.74996	0.0296424	0.00108785
104964	19	13.6778	0.0599718	14.7594	0.0693799	33.2012	0.147651	2.42738	0.00153731	1.07908	0.00131923	49.4331	1.14696	0.030134	0.00168421
104964	20	13.7826	0.0440497	14.8018	0.0517629	33.3042	0.108387	2.4164	0.00346791	1.07395	0.00123738	50.8622	0.357885	0.0284874	0.00079023
104964	21	13.6759	0.0590011	14.7769	0.0619772	33.2446	0.140984	2.4309	0.00272312	1.08051	0.00168629	51.0766	0.754415	0.0273876	0.00081102
104964	22	13.7351	0.0656089	14.8213	0.0758797	33.3789	0.154674	2.4302	0.00288385	1.07908	0.00112111	50.4675	1.85841	0.0293244	0.00223154
104964	23	13.724	0.0600271	14.8169	0.0620091	33.3605	0.143227	2.43083	0.00165457	1.07964	0.000960288	51.0651	0.885264	0.0283995	0.00156412
104964	24	13.7163	0.0788155	14.7906	0.0731723	33.2893	0.185248	2.427	0.00265714	1.07833	0.0014508	51.998	1.31651	0.0299564	0.00162338
211059	1	13.6959	0.0607475	14.7985	0.0665764	33.4568	0.150137	2.44284	0.00242999	1.08051	0.00147579	54.947	1.56865	0.0258598	0.00158922
211059	2	13.658	0.211979	14.7648	0.209174	33.3789	0.519322	2.44393	0.00716843	1.08111	0.00364102	35.0318	1.60233	0.0326034	0.00181286
211059	3	13.5999	0.0234278	14.711	0.0263106	33.2435	0.0565518	2.44431	0.00127618	1.08167	0.000888512	74.8465	0.417833	0.0171534	0.000204151
211059	4	13.6372	0.0695843	14.695	0.0753853	33.2742	0.167689	2.44002	0.00228924	1.07755	0.00135301	63.6852	2.99439	0.0200216	0.000847992
211059	5	13.6126	0.0283591	14.7304	0.0317688	33.2915	0.0650421	2.44566	0.00210536	1.08213	0.00109873	59.7836	0.981594	0.0207268	0.000489491
211059	6	13.635	0.0330539	14.7468	0.0307707	33.3183	0.0641789	2.44466	0.00331486	1.082	0.00166596	41.3325	0.324302	0.0285278	0.000537715
211059	7	13.6318	0.111358	14.7503	0.121723	33.3229	0.260589	2.44456	0.00375221	1.08206	0.00201312	44.7452	1.30517	0.0268565	0.00101816
211059	8	13.6674	0.0527715	14.7836	0.0546784	33.4053	0.120851	2.4442	0.00319937	1.08169	0.00163312	49.1265	2.14787	0.0271901	0.00132742
211059	9	13.7458	0.0827479	14.8725	0.0925865	33.6248	0.212871	2.44616	0.00325806	1.08197	0.00188059	37.1193	2.22174	0.035783	0.00275856
211059	10	13.646	0.0681828	14.7727	0.0751191	33.3942	0.170329	2.44717	0.0019671	1.08256	0.0011413	64.1439	2.15632	0.0191127	0.00084598
211059	11	13.6387	0.0330657	14.7597	0.0356199	33.3553	0.0805596	2.44566	0.00206518	1.0822	0.00111822	58.1325	1.23025	0.0211203	0.00086285
211059	12	13.6741	0.0556748	14.7829	0.063046	33.4175	0.117531	2.44529	0.00313908	1.08109	0.00170985	35.2231	0.346449	0.0351141	0.000778578
211059	13	13.706	0.0738176	14.8249	0.083386	33.4725	0.163746	2.44504	0.00227966	1.08162	0.00129734	52.1528	2.63615	0.0255694	0.00144824
211059	14	13.7039	0.0488182	14.804	0.0474265	33.4974	0.0900874	2.44454	0.00601575	1.07956	0.00286879	19.399	0.25066	0.0637447	0.00158435
211059	15	13.69	0.0780621	14.8239	0.0911748	33.4929	0.192509	2.44654	0.00255153	1.0828	0.0015001	47.1531	1.8804	0.0298039	0.0014482
211059	16	13.6362	0.0330302	14.7586	0.0397848	33.357	0.0871471	2.44622	0.00316639	1.08232	0.00172343	42.6669	0.498421	0.0315419	0.000745813
211059	17	13.5996	0.173096	14.7153	0.178501	33.2614	0.405841	2.44581	0.00470363	1.08207	0.00304561	46.0349	0.435607	0.0257204	0.000934969
211059	18	13.6684	0.0675254	14.7768	0.0684974	33.4488	0.156398	2.44721	0.00180874	1.0809	0.000836366	70.7202	3.25963	0.0189024	0.00105837
211059	19	13.6514	0.073072	14.7534	0.0765659	33.3538	0.179325	2.44326	0.00217483	1.08074	0.00105443	54.2315	1.00861	0.0233689	0.000679937
211059	20	13.7256	0.0675471	14.8497	0.0694237	33.5505	0.153712	2.44444	0.00341727	1.08193	0.00164345	41.7926	2.96217	0.0334264	0.00206535
211059	21	13.7109	0.0596503	14.8157	0.0684574	33.507	0.149603	2.44465	0.00297557	1.08057	0.00165806	44.6488	2.90751	0.0315425	0.00236372
211059	22	13.6334	0.0909009	14.7549	0.0965959	33.3552	0.222445	2.44658	0.00166367	1.08227	0.000817698	73.1193	1.89272	0.0172786	0.000647599
211059	23	13.5754	0.0313406	14.6866	0.0331567	33.2014	0.07566	2.44571	0.00182609	1.08208	0.00077548	75.0852	1.47049	0.0179255	0.000588143
211059	24	13.6888	0.0712754	14.8115	0.0796117	33.4711	0.180001	2.4446	0.00217806	1.08195	0.00111801	58.6361	3.41996	0.0244765	0.0014345
211059	25	13.6488	0.0624067	14.7454	0.0663162	33.3376	0.144651	2.44195	0.00254179	1.08036	0.00132639	43.1577	1.334	0.0285096	0.00109439
211059	26	13.7183	0.0664231	14.8196	0.0703789	33.4376	0.14382	2.43757	0.00447846	1.08032	0.00248148	27.4439	1.39309	0.0472488	0.00280225
211059	27	13.5646	0.0508483	14.6814	0.055204	33.1515	0.131797	2.44398	0.00334285	1.08234	0.00163628	59.4494	0.625535	0.0226281	0.00045822
211059	28	13.6759	0.0627273	14.7655	0.0654135	33.5159	0.150631	2.45133	0.00223441	1.07969	0.00130967	54.9162	2.16863	0.0266913	0.000974195
211059	29	13.6939	0.0905016	14.7959	0.0876603	33.477	0.215654	2.44477	0.0051391	1.08058	0.00274613	23.4026	0.501075	0.0546475	0.00188653
211059	30	13.6545	0.0573236	14.7601	0.0537206	33.344	0.111935	2.44434	0.00392158	1.08215	0.00220782	30.413	0.700818	0.0428837	0.000925649
211059	31	13.5896	0.0435784	14.7031	0.049501	33.1983	0.098401	2.44297	0.00319303	1.08195	0.00172562	43.8242	0.996613	0.0318505	0.000851058
211059	32	13.5657	0.0531682	14.6747	0.0560467	33.1584	0.127609	2.4443	0.00176553	1.08177	0.0010061	70.4616	1.45806	0.0209479	0.000465418
211059	33	13.5772	0.0472149	14.6771	0.052124	33.1516	0.110539	2.44174	0.00147364	1.08101	0.000806507	87.9075	2.55586	0.0172063	0.00050864
211059	34	13.6261	0.0556062	14.7341	0.056647	33.2725	0.122018	2.44189	0.00321576	1.08134	0.0016517	37.9746	1.31011	0.0377885	0.00137207
211059	35	13.6396	0.184608	14.7665	0.168191	33.3822	0.35978	2.44775	0.00964705	1.08274	0.00502541	28.5484	0.727215	0.046919	0.00217458
211059	36	13.6594	0.154745	14.7953	0.159584	33.3353	0.378386	2.44048	0.0061637	1.08323	0.00743101	20.2223	0.197874	0.0626307	0.00108965
211059	37	13.6355	0.0435556	14.7552	0.043954	33.3261	0.096246	2.44413	0.00340452	1.08215	0.00184775	35.135	0.704792	0.0391778	0.000961964
211059	38	13.5737	0.0510125	14.6941	0.0562053	33.1647	0.116141	2.44337	0.00257721	1.08262	0.00153723	41.6105	0.815933	0.0309967	0.00102567
211059	39	13.6497	0.0584036	14.7776	0.0601147	33.3552	0.12791	2.4437	0.00404691	1.08266	0.00301593	34.3975	0.208505	0.0416876	0.000616949
183149	1	13.7329	0.150676	14.9029	0.172264	33.7731	0.320232	2.45961	0.0151338	1.08537	0.0105943	32.2053	1.13454	0.0587834	0.00317562
183149	2	13.6786	0.0781009	14.8002	0.102237	33.5355	0.186937	2.45195	0.00994373	1.0821	0.00595851	28.6265	0.915413	0.0620673	0.00283918
183149	3	13.7674	0.0943256	14.8126	0.100788	33.5273	0.174671	2.43602	0.012994	1.07621	0.00702148	32.7563	1.79587	0.0602282	0.00362982
183149	4	13.7258	0.104895	14.8826	0.0961308	33.6207	0.208929	2.45041	0.0156319	1.08474	0.00761531	24.7757	0.320246	0.0744026	0.00214534
183149	5	13.7574	0.118586	14.8695	0.11559	33.696	0.247665	2.45027	0.0160121	1.08125	0.00742201	19.7996	0.757443	0.0905305	0.00420747
183149	6	13.5828	0.167707	14.7988	0.115237	33.5757	0.282498	2.47279	0.021545	1.08995	0.0098772	32.1734	1.93652	0.0601636	0.00639739
183149	7	13.6876	0.154867	14.8559	0.161758	33.6207	0.33657	2.45679	0.0162021	1.08553	0.00756161	32.9298	1.1631	0.0595773	0.00320666
183149	8	13.7258	0.181229	14.8516	0.111171	33.6962	0.233778	2.45695	0.0270318	1.07881	0.0113282	26.2989	1.33145	0.0722878	0.00424945
183149	9	13.7767	0.210707	14.8408	0.205875	33.5655	0.372127	2.43752	0.0362052	1.07764	0.0163746	28.5404	0.619601	0.0622386	0.00227315
183149	10	13.7827	0.138608	14.9463	0.123543	33.6695	0.188568	2.44437	0.0242556	1.08165	0.0123486	21.9238	0.295475	0.0816073	0.0024668
183149	11	13.7326	0.102926	14.8189	0.110592	33.5858	0.250997	2.44619	0.013725	1.07934	0.00625111	27.2509	0.990078	0.0699483	0.00368837
183149	12	13.6658	0.145888	14.8396	0.148737	33.5554	0.282252	2.45593	0.016919	1.08601	0.00628063	37.6608	1.3561	0.0495271	0.00217225
183149	13	13.7079	0.0979667	14.8343	0.119425	33.5503	0.228052	2.44968	0.010438	1.08025	0.00679633	28.8002	1.16598	0.075149	0.00385871
183149	14	13.6785	0.170102	14.8955	0.191077	33.4451	0.261345	2.43848	0.0251505	1.08985	0.016334	23.2608	0.326093	0.0797235	0.0027505
183149	15	13.7498	0.262563	14.859	0.306884	33.6076	0.667222	2.44427	0.0144036	1.08082	0.012883	22.2276	1.07832	0.0926151	0.0056586
183149	16	13.5835	0.131352	14.7604	0.155663	33.3243	0.216426	2.45445	0.0216236	1.08711	0.0125608	23.3315	0.21284	0.0718951	0.0026414
183149	17	13.6279	0.18122	14.8036	0.159492	33.4374	0.395031	2.45393	0.0130938	1.08656	0.00911617	33.0866	1.60849	0.0613843	0.00408788
183149	18	13.6526	0.138911	14.8143	0.162294	33.4468	0.22993	2.45091	0.0189816	1.08534	0.00955207	21.1434	0.236002	0.0946436	0.00227014
183149	19	13.7197	0.104312	14.8724	0.102718	33.6625	0.217465	2.45023	0.0165747	1.08262	0.00865713	24.9026	1.4217	0.085212	0.0048539
183149	20	13.6904	0.10658	14.8257	0.0996541	33.5465	0.13264	2.45449	0.0167281	1.0835	0.00874512	22.729	0.418122	0.083741	0.00270473
183149	21	13.7128	0.0855011	14.8596	0.087746	33.5184	0.192509	2.44482	0.0126229	1.08182	0.00731788	29.6722	1.80452	0.0716059	0.0041359
183149	22	13.7657	0.150481	14.9271	0.187244	33.4958	0.253075	2.43397	0.0148647	1.08462	0.0120111	23.3321	0.607538	0.0791944	0.00335149
183149	23	13.7097	0.0830605	14.833	0.0843325	33.5616	0.149476	2.45114	0.0105562	1.08223	0.00660429	31.3252	0.993569	0.0635378	0.00280504
183149	24	13.7344	0.0932652	14.7597	0.0839613	33.4681	0.147689	2.43759	0.0118639	1.07508	0.00753251	25.6139	0.288178	0.076142	0.00156933
183149	25	13.6647	0.120229	14.799	0.113729	33.4774	0.197461	2.45395	0.0121537	1.08342	0.00689953	26.7263	0.552417	0.0733585	0.00285152
183149	26	13.611	0.106883	14.7646	0.106473	33.4142	0.259263	2.4553	0.011179	1.08501	0.00567144	30.375	0.889515	0.0679007	0.002736
183149	27	13.7609	0.119542	14.8665	0.123739	33.7186	0.229566	2.4468	0.0170308	1.0812	0.0082973	23.4028	1.27038	0.0925974	0.00418832
183149	28	13.654	0.103094	14.7588	0.0990807	33.5114	0.190094	2.45848	0.0125161	1.08309	0.00865506	26.351	1.19469	0.0782959	0.00378563
183149	29	13.6264	0.111208	14.7563	0.120218	33.4945	0.184472	2.45933	0.016211	1.08341	0.00899273	23.0101	0.297353	0.0788102	0.00190678
183149	30	13.6755	0.231995	14.787	0.197538	33.6602	0.424767	2.46289	0.0244696	1.08212	0.0143438	23.7748	0.54518	0.0787203	0.00314619
183149	31	13.5934	0.0886433	14.7462	0.0823871	33.4787	0.194629	2.46332	0.0111935	1.08507	0.00579354	31.0354	1.51405	0.0610779	0.00298481
183149	32	13.6413	0.133601	14.8022	0.123022	33.5505	0.242847	2.46039	0.0171124	1.08569	0.0114084	24.3914	0.612161	0.0773088	0.00288222
183149	33	13.6156	0.118271	14.7639	0.121258	33.5028	0.230874	2.46113	0.0126234	1.08454	0.00691823	34.8267	1.23423	0.0528802	0.0028908
183149	34	13.6286	0.110719	14.8109	0.10329	33.505	0.191929	2.45955	0.0153204	1.08725	0.0081155	27.8912	0.651514	0.0645126	0.0027202
183149	35	13.6159	0.104092	14.7757	0.115014	33.5674	0.195126	2.4662	0.0140102	1.08556	0.00823251	25.395	1.08633	0.0714718	0.00304421
199024	1	13.6892	0.0315062	14.8132	0.0407759	33.4007	0.0754286	2.43994	0.00446465	1.08211	0.0023208	50.2677	2.01031	0.0384045	0.00118044
199024	2	13.712	0.0505358	14.8484	0.0535562	33.3737	0.121239	2.43394	0.00602732	1.08289	0.00249132	35.7393	0.535233	0.0512803	0.00113248
199024	3	13.7027	0.0299522	14.8211	0.0336227	33.3598	0.0674928	2.43456	0.00269575	1.08162	0.00134589	48.0458	2.62935	0.036418	0.00290292
199024	4	13.6951	0.0348405	14.8169	0.0450898	33.3871	0.0754641	2.4379	0.00363091	1.08192	0.00236453	46.4236	2.05405	0.0354357	0.00193428
199024	5	13.7368	0.103599	14.8597	0.0751104	33.4408	0.241033	2.43442	0.00617473	1.08177	0.0030822	49.7082	2.2744	0.0379575	0.00126454
199024	6	13.7601	0.179423	14.8591	0.187973	33.4524	0.442372	2.43111	0.00627451	1.07989	0.00335905	48.4538	4.46739	0.029463	0.00766035
199024	7	13.7331	0.0325956	14.8581	0.0365073	33.452	0.076703	2.43589	0.00200747	1.08221	0.000935663	56.3606	3.73707	0.0314842	0.0020824
199024	8	13.8128	0.0908231	14.8859	0.0902416	33.5502	0.200999	2.42894	0.00219753	1.07769	0.000972351	77.397	4.22223	0.0200954	0.00213962
199024	9	13.7722	0.0459685	14.8553	0.0450781	33.4867	0.0883649	2.43155	0.00394099	1.07867	0.00191108	40.722	2.04677	0.0441444	0.00320241
199024	10	13.7652	0.0447892	14.8654	0.0471625	33.4767	0.107695	2.43132	0.00205818	1.07993	0.00115333	54.1092	5.09633	0.0362722	0.0031979
199024	11	13.7376	0.0280462	14.8599	0.0321033	33.4423	0.0619724	2.43439	0.00279585	1.08171	0.00172171	51.0415	4.65028	0.0355047	0.00292819
199024	12	13.725	0.0430896	14.8491	0.0446392	33.4554	0.0993259	2.43758	0.0026762	1.08191	0.0014575	34.6215	0.986687	0.0554507	0.00179341
199024	13	13.7479	0.0600066	14.8596	0.060358	33.4618	0.136417	2.434	0.00332453	1.08088	0.0014707	43.2605	1.99104	0.0405429	0.00231787
199024	14	13.6843	0.0341393	14.8183	0.03842	33.3469	0.078034	2.43688	0.00239247	1.08287	0.00195593	57.6087	2.37619	0.0280542	0.00157059
199024	15	13.7496	0.0546705	14.8537	0.0838029	33.4493	0.165768	2.43273	0.00364141	1.08029	0.00326775	58.706	2.0381	0.0304897	0.00134303
199024	16	13.716	0.0319114	14.8514	0.0343903	33.4294	0.076253	2.43727	0.00201089	1.08279	0.00106873	50.2928	1.84861	0.0348214	0.00149412
199024	17	13.7033	0.0536728	14.8258	0.0599865	33.3967	0.13233	2.43677	0.00239548	1.08174	0.00131791	50.7273	2.86325	0.0361017	0.00204779
199024	18	13.7314	0.0816837	14.8331	0.0797344	33.3762	0.232042	2.43066	0.0096641	1.08024	0.00317834	61.4355	1.05557	0.0278047	0.00158229
199024	19	13.7574	0.052775	14.847	0.077709	33.396	0.13648	2.42751	0.00553739	1.0792	0.00332303	33.2558	0.991229	0.0491077	0.00122001
199024	20	13.733	0.0522517	14.851	0.0530712	33.4412	0.123866	2.43512	0.00246536	1.08142	0.00132665	47.5808	2.08296	0.0338143	0.00185989
199024	21	13.7186	0.0284662	14.8545	0.0333762	33.427	0.064815	2.4365	0.00210013	1.08215	0.00137237	57.1435	3.30593	0.0318439	0.00176717
199024	22	13.7131	0.0578062	14.8356	0.0618632	33.4049	0.142375	2.43597	0.00123824	1.08185	0.000805497	82.4029	6.57841	0.0230898	0.00165295
199024	23	13.7786	0.0983456	14.8709	0.0911695	33.4879	0.196076	2.43051	0.0106235	1.07931	0.00507309	41.0135	2.36412	0.0411378	0.00192191
224329	1	13.8048	0.288241	14.8674	0.312485	33.5605	0.686377	2.43163	0.0188403	1.07699	0.0110477	30.0437	7.33946	0.0393456	0.0133833
224329	2	13.8169	0.297183	14.9021	0.286846	33.6004	0.609221	2.43191	0.0271424	1.07861	0.0107321	24.2666	6.51627	0.0478455	0.0151487
224329	3	13.8432	0.376798	14.9226	0.33455	33.6384	0.847176	2.43004	0.0210848	1.0774	0.0113573	28.7844	11.3187	0.0438536	0.0177936
224329	4	13.9087	0.353765	14.9327	0.439465	33.6947	0.863311	2.42262	0.0362236	1.07209	0.0186171	20.4258	3.44215	0.0686176	0.0106811
224329	5	13.8965	0.262968	14.888	0.229025	33.6247	0.53814	2.4197	0.0211074	1.07138	0.0128283	24.289	1.08681	0.0558678	0.00397261
224329	6	13.8494	0.268995	14.9155	0.298418	33.6528	0.646701	2.42992	0.0131101	1.07679	0.00602052	56.3792	32.091	0.0244652	0.0223596
224329	7	13.8047	0.313278	14.8541	0.343901	33.5196	0.693472	2.42689	0.0219771	1.07576	0.0107377	31.6603	7.45801	0.0365734	0.00981961
224329	8	13.9102	0.218631	14.849	0.288332	33.5466	0.622865	2.40949	0.0144196	1.06653	0.00872446	44.6239	1.43747	0.0245517	0.00233135
224329	9	13.8827	0.298374	14.9245	0.342907	33.6625	0.723112	2.42479	0.0149441	1.07483	0.00729064	46.8242	30.6114	0.0268575	0.0182317
224329	10	13.8045	0.240439	14.8828	0.274533	33.5543	0.569303	2.4307	0.0213083	1.07811	0.00998096	32.1925	8.01952	0.0359123	0.0127948
224329	11	13.8669	0.305543	14.9073	0.314254	33.6394	0.644341	2.42595	0.024158	1.07505	0.0129102	26.8614	7.33671	0.0454184	0.0158217
224329	12	13.8176	0.362243	14.88	0.339099	33.5526	0.749526	2.42908	0.0254258	1.07683	0.0145351	27.4502	7.46291	0.0513005	0.0113577
224329	13	13.8079	0.244979	14.8431	0.234556	33.511	0.564803	2.42694	0.0120021	1.07529	0.00553635	47.2146	19.0938	0.0267258	0.0120592
224329	14	13.8017	0.264748	14.865	0.292443	33.5368	0.63635	2.42992	0.0117152	1.07705	0.00595144	49.7442	16.2056	0.0242609	0.00877776
224329	15	13.8001	0.257859	14.8533	0.246545	33.5047	0.584737	2.42789	0.0126452	1.07634	0.00673015	46.7329	11.7311	0.0262274	0.00700499
224329	16	13.832	0.323025	14.8462	0.332751	33.503	0.799991	2.42215	0.0185758	1.07368	0.0090721	35.3876	10.382	0.0343157	0.00924261
224329	17	13.8136	0.359299	14.8366	0.368964	33.5252	0.788228	2.42704	0.0242407	1.07409	0.0134062	26.7864	8.66659	0.041603	0.0153818
224329	18	13.8775	0.411098	14.9231	0.430376	33.6684	0.950163	2.42617	0.0243172	1.07537	0.0126467	33.3831	6.3392	0.0384969	0.00829092
224329	19	13.9135	0.390054	14.9049	0.401386	33.6341	0.831054	2.41713	0.0267389	1.07047	0.013751	32.9395	15.3099	0.0474976	0.0181271
224329	20	13.8532	0.260729	14.8878	0.283321	33.5659	0.584542	2.42409	0.0203477	1.0747	0.0100849	34.549	14.5536	0.0380704	0.0151769
224329	21	13.8518	0.277615	14.8637	0.317874	33.5656	0.697571	2.42309	0.0178133	1.07297	0.010205	39.7501	16.7713	0.0351013	0.0104504
224329	22	13.8309	0.25024	14.8748	0.282388	33.5337	0.625279	2.42511	0.0180348	1.07493	0.0121525	31.737	11.0304	0.0400745	0.0136702
224329	23	13.8934	0.237052	14.9396	0.227293	33.6917	0.565603	2.42502	0.0147232	1.07531	0.00738156	49.1765	12.3294	0.0270322	0.00788512
224329	24	13.7841	0.235028	14.8436	0.23374	33.4786	0.434849	2.43003	0.018185	1.07688	0.00796742	45.001	7.07592	0.0282073	0.0053668
224329	25	13.8557	0.27706	14.8944	0.275224	33.6232	0.618527	2.42671	0.0226537	1.07554	0.0139121	30.7907	14.1622	0.0432072	0.0174617
224329	26	13.8871	0.252292	14.8501	0.253209	33.5694	0.529137	2.41735	0.0222341	1.06936	0.0130326	28.7635	2.14279	0.0451846	0.00446393
224329	27	13.8892	0.198809	14.8714	0.277973	33.6892	0.498041	2.42559	0.016454	1.07073	0.0150518	20.6987	1.38652	0.0658885	0.005042
224329	28	13.9021	0.352744	14.8968	0.366392	33.6462	0.796872	2.42028	0.0230771	1.07157	0.0116139	32.5614	10.9234	0.0379828	0.0123594
224329	29	13.8133	0.288936	14.8822	0.307405	33.5456	0.679209	2.42853	0.0190694	1.0774	0.0102283	32.1789	5.4052	0.0386156	0.00353877
224329	30	13.854	0.262791	14.8622	0.227815	33.5303	0.606332	2.42029	0.0166595	1.07321	0.00819678	40.0745	11.6255	0.0302984	0.00916772
224329	31	13.8281	0.303491	14.8635	0.321748	33.4971	0.64719	2.42246	0.0271222	1.07489	0.014222	25.7991	3.14154	0.0422003	0.00715129
224329	32	13.8649	0.181049	14.909	0.253461	33.593	0.441242	2.42292	0.026235	1.07532	0.0154523	20.1005	1.40758	0.0599489	0.00534418
224329	33	13.8446	0.295122	14.8655	0.261084	33.5625	0.613809	2.42429	0.0214952	1.07419	0.0128404	30.4773	1.48742	0.0354818	0.00309726
224329	34	13.9123	0.324779	14.9309	0.32189	33.6546	0.744181	2.41911	0.0247548	1.07324	0.0124206	30.7234	11.7272	0.0415188	0.0134754
193316	1	13.7514	0.183077	14.8308	0.209682	33.6625	0.480926	2.44791	0.00663285	1.07849	0.00486807	39.0587	2.90373	0.0408026	0.0041829
193316	2	13.7221	0.0962341	14.8261	0.109828	33.5585	0.155685	2.44562	0.0117308	1.08046	0.00141574	38.7855	0.723164	0.0427724	0.0046505
193316	3	13.7028	0.122579	14.8565	0.184266	33.5862	0.459335	2.451	0.0136075	1.08418	0.00469577	30.8971	1.0704	0.0638528	0.00732951
193316	4	13.7484	0.183476	14.8954	0.172858	33.6866	0.356995	2.45028	0.00723948	1.08345	0.0049967	33.4279	1.84136	0.0495169	0.00404481
178190	1	13.7116	0.0795244	14.8461	0.0842563	33.5613	0.153703	2.44802	0.00761267	1.08291	0.00514414	48.3725	1.48418	0.031711	0.000855257
178190	2	13.7702	0.140492	14.8488	0.156407	33.6483	0.321916	2.44395	0.00885182	1.07839	0.00437013	59.5494	2.3744	0.0230843	0.00110536
178190	3	13.8374	0.199054	14.9235	0.185852	33.8104	0.390854	2.44513	0.030146	1.07952	0.017128	24.0138	1.07569	0.0599908	0.00299675
178190	4	13.7045	0.0962208	14.8497	0.105041	33.5412	0.241788	2.44752	0.00626467	1.0828	0.00359058	67.7539	2.79835	0.0224957	0.00102703
178190	5	13.7033	0.118426	14.8529	0.121378	33.5409	0.24241	2.44844	0.0128699	1.08582	0.00566738	40.7737	2.1841	0.0343746	0.00210229
178190	6	13.8034	0.131756	14.8566	0.154626	33.6158	0.265356	2.43564	0.0128905	1.07637	0.00733815	52.3113	2.26073	0.0304424	0.00203653
178190	7	13.7764	0.0520076	14.8075	0.0637595	33.5517	0.119425	2.43709	0.00551114	1.0749	0.00386647	58.7383	1.73253	0.0223117	0.000953179
178190	8	13.7771	0.0949114	14.8861	0.100595	33.5992	0.20121	2.43913	0.00817053	1.08064	0.0047561	51.9302	3.07664	0.0338244	0.00292801
178190	9	13.7156	0.15122	14.8431	0.159816	33.5218	0.299013	2.44454	0.0162677	1.08235	0.00800504	45.3588	2.04342	0.0293357	0.00196683
178190	10	13.7317	0.0990537	14.8218	0.124891	33.5105	0.239904	2.44049	0.0125657	1.0794	0.00547052	77.6732	3.67039	0.0176324	0.0013675
178190	11	13.6488	0.0722386	14.7814	0.0719142	33.3715	0.133232	2.44507	0.00730824	1.08293	0.00443812	67.6688	1.2942	0.0199543	0.000657213
178190	12	13.767	0.0977457	14.8431	0.106051	33.5296	0.222757	2.4357	0.00605072	1.07825	0.00374198	61.8443	3.08489	0.0237079	0.00156294
178190	13	13.7724	0.0832216	14.8704	0.0848105	33.5829	0.195855	2.44226	0.00790424	1.08144	0.00364111	60.1073	4.47502	0.0256655	0.0018803
178190	14	13.6718	0.096027	14.8252	0.0924998	33.463	0.20308	2.44789	0.0058342	1.0845	0.00327191	77.0343	2.75024	0.0190665	0.000918279
178190	15	13.7897	0.0874761	14.8858	0.0989044	33.6299	0.194176	2.43897	0.00602107	1.07956	0.0041306	63.8824	2.58425	0.0237803	0.00135927
178190	16	13.7984	0.0905295	14.8803	0.0846649	33.6751	0.167294	2.44107	0.00979521	1.07745	0.0044496	45.9389	1.95842	0.0336552	0.00170137
178190	17	13.7651	0.0680811	14.8614	0.0777835	33.562	0.143703	2.43844	0.00766052	1.07971	0.00407701	60.5189	2.92021	0.0252882	0.00127439
178190	18	13.7687	0.20159	14.8326	0.197692	33.5935	0.379624	2.44117	0.0238403	1.07779	0.0120923	31.9798	1.01342	0.0463844	0.00195016
178190	19	13.6951	0.0722574	14.8237	0.0850931	33.5305	0.160165	2.44858	0.007254	1.08245	0.003535	72.6526	2.24602	0.0203314	0.000802824
178190	20	13.7369	0.195418	14.8706	0.203053	33.6407	0.299304	2.44944	0.0301413	1.08267	0.013504	49.121	0.924359	0.0259324	0.0021294
178190	21	13.7968	0.123569	14.8286	0.0935	33.5033	0.145402	2.43721	0.0135884	1.07752	0.0069911	36.7433	0.470995	0.0353422	0.00328343
178190	22	13.6619	0.152679	14.8633	0.151955	33.5235	0.24275	2.45467	0.0201885	1.08825	0.0105995	37.1796	0.61626	0.0388946	0.00190745
178190	23	13.697	0.238048	14.8595	0.241623	33.5209	0.50477	2.44768	0.0118123	1.08496	0.00435503	71.4691	2.28228	0.0210901	0.00141554
178190	24	13.7716	0.0840639	14.882	0.091941	33.6491	0.198037	2.44222	0.00503234	1.08002	0.00258124	90.381	7.06345	0.0180316	0.00132494
178190	25	13.789	0.110256	14.8929	0.121445	33.63	0.197387	2.43984	0.0174219	1.08039	0.00883162	29.4086	0.784007	0.04738	0.00157848
178190	26	13.6869	0.0682045	14.7997	0.0658117	33.4629	0.134453	2.44515	0.00712036	1.08141	0.00351018	73.2203	1.03292	0.0200973	0.000733382
178190	27	13.7785	0.159754	14.8738	0.162308	33.6767	0.38108	2.44433	0.0123987	1.07962	0.00674289	57.5554	1.61278	0.0247073	0.00132082
178190	28	13.759	0.0961493	14.8614	0.0955776	33.6045	0.187492	2.44027	0.0118818	1.07875	0.00474553	43.6833	3.78019	0.03685	0.00287901
178190	29	13.7244	0.106183	14.8323	0.106566	33.5468	0.238952	2.44992	0.00434324	1.08268	0.00346595	74.8172	3.28295	0.0197966	0.000959669
178190	30	13.7639	0.0986349	14.8921	0.103616	33.6359	0.20321	2.44421	0.00905818	1.08213	0.00491019	54.7599	2.70669	0.0295867	0.00125228
178190	31	13.6558	0.126652	14.8206	0.11109	33.4479	0.25322	2.44958	0.0123291	1.08545	0.00791009	57.0516	0.999681	0.0216795	0.000888888
178190	32	13.7228	0.0840882	14.8334	0.0927916	33.4631	0.167238	2.43892	0.0111512	1.08267	0.00547004	48.9943	0.670413	0.0292782	0.000939216
178190	33	13.7015	0.0838883	14.8425	0.0998442	33.5359	0.192651	2.44941	0.00685276	1.08434	0.00402828	61.4151	4.64834	0.026522	0.00200156
178190	34	13.8512	0.261908	14.9092	0.300598	33.6898	0.529697	2.43361	0.0316725	1.07686	0.0183012	20.4455	0.248651	0.0643006	0.0027702
178190	35	13.7262	0.0652235	14.8565	0.077989	33.5286	0.134229	2.44286	0.0102505	1.08132	0.00539088	47.3736	1.6621	0.0294712	0.00164043
178190	36	13.7179	0.0742747	14.8361	0.0739035	33.5069	0.155316	2.44285	0.00785394	1.08169	0.00490831	51.6099	2.18123	0.0281708	0.00179265
178190	37	13.7436	0.0621143	14.8065	0.0814321	33.5366	0.152223	2.44015	0.00930111	1.07765	0.00565944	44.5938	1.08531	0.0299024	0.00111378
178190	38	13.7524	0.210153	14.8452	0.301729	33.4321	0.595154	2.43087	0.0174484	1.07937	0.0120292	38.8045	1.58576	0.0346837	0.00168613
178190	39	13.6453	0.212627	14.866	0.208982	33.6736	0.389363	2.46834	0.0237654	1.08978	0.016047	36.8504	2.16353	0.0373488	0.00292553
219902	1	13.8062	0.286321	14.8833	0.272657	33.5782	0.565565	2.43219	0.024922	1.07805	0.0126415	23.3909	3.64573	0.0543355	0.0118305
219902	2	13.817	0.263073	14.8812	0.322975	33.5941	0.626417	2.43139	0.0246199	1.07703	0.0135024	28.6048	6.96137	0.0456161	0.0145969
219902	3	13.8471	0.335991	14.9317	0.332822	33.6657	0.713853	2.43275	0.0258065	1.07836	0.0126372	23.2359	7.77532	0.0550605	0.0210999
219902	4	13.8314	0.283395	14.916	0.339079	33.6863	0.683827	2.43298	0.0304587	1.07787	0.0163984	21.0037	3.48945	0.0598902	0.0185365
219902	5	13.8283	0.255497	14.9055	0.25182	33.615	0.5118	2.43093	0.0194439	1.07791	0.00743979	29.9629	4.88381	0.0411887	0.0116884
219902	6	13.815	0.266629	14.8964	0.23961	33.623	0.565361	2.43215	0.01719	1.07765	0.00931569	31.4445	5.64112	0.0422379	0.00919518
219902	7	13.8413	0.2599	14.909	0.277741	33.6489	0.614803	2.43044	0.0189332	1.07715	0.0119071	29.0882	8.29073	0.0484319	0.0148454
219902	8	13.8257	0.282996	14.9044	0.271402	33.6474	0.666634	2.43373	0.0243601	1.07807	0.0159201	24.3325	5.30676	0.0548501	0.0171765
219902	9	13.8532	0.298753	14.931	0.319482	33.6986	0.705991	2.43259	0.0250709	1.07782	0.0127303	26.8172	5.77888	0.0486223	0.0148543
219902	10	13.853	0.289809	14.9355	0.274055	33.6954	0.571298	2.43242	0.02485	1.07858	0.0136856	26.815	4.27682	0.0457843	0.0139838
219902	11	13.8442	0.245797	14.9261	0.247262	33.6828	0.549382	2.43302	0.0180009	1.07817	0.0107771	32.5424	3.89178	0.0409758	0.00903705
219902	12	13.8537	0.248705	14.9162	0.24324	33.6702	0.51494	2.43047	0.0226953	1.07672	0.013032	26.6286	7.49204	0.0495918	0.0179694
219902	13	13.8429	0.235969	14.9201	0.269215	33.5894	0.490257	2.42652	0.0255514	1.07783	0.0124086	24.2953	2.26697	0.058238	0.00635562
219902	14	13.8968	0.340576	14.9678	0.369089	33.8051	0.770066	2.43265	0.0313754	1.07711	0.0189855	19.7104	4.73787	0.0664579	0.0229847
219902	15	13.8426	0.274425	14.9102	0.285502	33.6695	0.636939	2.43169	0.0239271	1.07715	0.014205	25.4485	4.69692	0.0495407	0.0162057
219902	16	13.8112	0.273364	14.8968	0.281491	33.5871	0.630784	2.43191	0.0219222	1.07863	0.0114171	28.1703	4.45126	0.045972	0.0136837
219902	17	13.8393	0.25318	14.8983	0.252632	33.6299	0.571452	2.43006	0.0183549	1.07608	0.0118344	27.575	4.36416	0.0480573	0.0137548
219902	18	13.8245	0.265865	14.9038	0.301106	33.601	0.565977	2.43059	0.0235856	1.07776	0.0111816	27.8386	7.61769	0.0481785	0.0180563
219902	19	13.8155	0.337261	14.872	0.351721	33.5616	0.740283	2.42934	0.0291562	1.0765	0.0152866	22.8595	4.27229	0.0594614	0.0135563
219902	20	13.8536	0.292808	14.9171	0.323469	33.6588	0.672648	2.42787	0.0296802	1.0756	0.0175442	28.0958	6.60228	0.0488498	0.0144467
219902	21	13.8533	0.27782	14.9139	0.302143	33.6778	0.650082	2.43039	0.0267405	1.07658	0.013329	25.6791	8.70708	0.0554743	0.01936
219902	22	13.8825	0.273797	14.9745	0.325123	33.7836	0.677123	2.43323	0.023437	1.07839	0.0147103	27.9723	11.2814	0.0504925	0.0218353
219902	23	13.8164	0.266775	14.8974	0.287623	33.5767	0.592914	2.43024	0.0231842	1.07825	0.0123278	29.4285	5.69148	0.0445221	0.0128678
219902	24	13.8475	0.232774	14.9071	0.264783	33.6604	0.568239	2.43082	0.0220379	1.07654	0.0135674	26.0205	6.98954	0.0511483	0.0159844
219902	25	13.8738	0.308869	14.9881	0.361253	33.8366	0.663162	2.43899	0.0362427	1.08035	0.0206209	18.3974	4.28238	0.0724669	0.0193671
219902	26	13.8333	0.266239	14.9022	0.312147	33.6161	0.600617	2.4313	0.0207924	1.07728	0.0122683	31.3046	6.06989	0.0413185	0.00990732
219902	27	13.8734	0.239023	14.9937	0.333591	33.75	0.638093	2.43275	0.029204	1.08076	0.0178615	19.5051	2.73696	0.0604227	0.0135741
219902	28	13.8327	0.268297	14.9228	0.339172	33.6552	0.656437	2.43299	0.0198398	1.07882	0.0112424	33.6295	7.06016	0.043396	0.0101244
219902	29	13.9011	0.352618	14.946	0.342693	33.8003	0.768351	2.43161	0.039434	1.07599	0.025039	15.5385	2.65655	0.0794921	0.0259807
219902	30	13.8951	0.448616	14.9488	0.323082	33.7877	0.676819	2.43192	0.0456984	1.07655	0.0259954	20.0751	3.13006	0.0656018	0.0141213
219902	31	13.8364	0.263047	14.9209	0.254097	33.647	0.53384	2.43252	0.0232732	1.07841	0.0146533	28.2203	5.05225	0.0433009	0.0132002
219902	32	13.8039	0.204567	14.8854	0.249088	33.5801	0.52137	2.43267	0.0176776	1.07835	0.00840834	44.134	10.3491	0.0297732	0.00863447
219902	33	13.8173	0.258427	14.9018	0.259383	33.6539	0.585387	2.43567	0.0240624	1.07851	0.0111132	28.3488	5.04815	0.0482885	0.0110461
219902	34	13.8178	0.211875	14.8993	0.241018	33.609	0.477165	2.43233	0.0207448	1.07828	0.0104489	31.4206	4.94492	0.0433918	0.0093597
219902	35	13.7992	0.254698	14.877	0.261749	33.5753	0.569233	2.43368	0.0190766	1.07842	0.00998442	28.4119	3.49843	0.0440622	0.0102283
204585	1	13.8076	0.127215	14.9044	0.126203	33.7101	0.294903	2.44145	0.00357955	1.07946	0.00330317	46.8743	3.42282	0.0403668	0.00261575
204585	2	13.8124	0.0389746	14.863	0.0401164	33.6357	0.0866885	2.43521	0.00332045	1.07608	0.00175791	36.2793	1.24156	0.046541	0.00240445
204585	3	13.8014	0.047244	14.8778	0.0429076	33.6458	0.11061	2.43787	0.00296279	1.07801	0.00141542	48.2963	3.22364	0.0392063	0.0027737
204585	4	13.722	0.054217	14.8014	0.0551666	33.4677	0.118062	2.43902	0.00427956	1.07868	0.00222957	45.2463	1.11559	0.0406753	0.00110316
204585	5	13.8173	0.308311	14.8855	0.304122	33.6906	0.742127	2.4383	0.0063412	1.07735	0.00339234	85.5177	4.81318	0.0204004	0.00179276
204585	6	13.8674	0.0624342	14.8977	0.0659612	33.7746	0.153975	2.43438	0.00311618	1.07431	0.00185112	29.2261	1.10796	0.0590524	0.00296711
204585	7	13.8563	0.272271	14.9071	0.271549	33.7414	0.848117	2.43495	0.0245904	1.07587	0.00639761	21.2446	0.687547	0.0883039	0.00310085
204585	8	13.7537	0.187459	14.8502	0.184449	33.5639	0.412744	2.44043	0.00539679	1.07976	0.00257428	62.6431	1.99537	0.0275275	0.00154857
204585	9	13.7689	0.243092	14.7768	0.255944	33.5199	0.56693	2.43458	0.00735872	1.07326	0.00577343	17.9839	1.15929	0.0923053	0.00523271
204585	10	13.8207	0.0408207	14.9074	0.0331754	33.7327	0.0769571	2.4408	0.00307458	1.07867	0.00213645	31.5644	2.1283	0.0596079	0.00354564
204585	11	13.7797	0.164613	14.873	0.173715	33.6215	0.394807	2.4393	0.00191186	1.07939	0.00127469	49.9047	6.24276	0.0423057	0.00511612
204585	12	13.8733	0.104739	14.9093	0.116835	33.8028	0.331323	2.43644	0.00661218	1.0747	0.00538287	19.8468	0.647437	0.0797206	0.00571316
204585	13	13.7823	0.0972489	14.7807	0.0958821	33.5081	0.192654	2.43132	0.00658808	1.07247	0.00399217	33.6139	1.34982	0.0496126	0.000873363
204585	14	13.7352	0.0800779	14.8311	0.0854158	33.4913	0.193318	2.43836	0.00232041	1.07979	0.00143582	43.181	0.731868	0.0421274	0.000837924
204585	15	13.8218	0.250278	14.8224	0.253653	33.6304	0.574061	2.43345	0.00510451	1.07256	0.0039251	36.7017	3.71429	0.0481794	0.00579143
204585	16	13.8272	0.0657133	14.8553	0.0386896	33.6151	0.0999098	2.43114	0.00815831	1.07437	0.00260343	40.3642	0.596896	0.0424058	0.000936004
204585	17	13.6888	0.0193619	14.7884	0.0141448	33.3919	0.0377023	2.43938	0.0018525	1.08034	0.00102537	75.6079	1.75301	0.0224736	0.000640813
204585	18	13.8103	0.112199	14.8335	0.125791	33.6523	0.273564	2.43675	0.00119314	1.07408	0.00127025	71.5136	4.39227	0.0225122	0.001621
204585	19	13.7652	0.0629175	14.84	0.060525	33.5668	0.141737	2.43855	0.00304461	1.0781	0.0017225	65.517	2.18946	0.0277002	0.00150374
204585	20	13.7938	0.135389	14.768	0.152474	33.5694	0.32592	2.43368	0.00293879	1.07063	0.00354837	49.6706	1.45168	0.0290193	0.000610774
204585	21	13.6961	0.0404279	14.8002	0.0444206	33.431	0.100426	2.44091	0.001779	1.08058	0.000963455	74.8558	3.66246	0.0209921	0.00160201
204585	22	13.789	0.0624448	14.8062	0.0565246	33.5432	0.142588	2.43263	0.00313849	1.0738	0.00178585	57.58	2.39761	0.0244714	0.00166309
185985	1	13.7865	0.0342771	14.9129	0.0322481	33.6986	0.0675319	2.4446	0.00383184	1.08252	0.00232075	23.7359	0.501933	0.0653737	0.00101044
185985	2	13.7432	0.0343031	14.8725	0.0354648	33.5865	0.075675	2.44391	0.00361189	1.08219	0.00193982	31.0477	1.10402	0.0486606	0.00217589
185985	3	13.8029	0.150691	14.9885	0.0954673	33.8195	0.269996	2.45031	0.013316	1.08598	0.00746502	30.3231	0.502448	0.0532294	0.00155567
185985	4	13.7743	0.0766077	14.9001	0.0770652	33.718	0.214551	2.44789	0.00695083	1.08175	0.00298275	38.9907	0.500431	0.0440227	0.00174881
185985	5	13.781	0.116285	14.92	0.124257	33.7429	0.24931	2.44856	0.00810604	1.08266	0.00351074	25.8575	0.452773	0.0567499	0.00170955
185985	6	13.7949	0.0727675	14.9186	0.112697	33.7168	0.178556	2.44418	0.00892058	1.08145	0.00509347	36.8779	1.64671	0.0474938	0.00242056
185985	7	13.8078	0.0387791	14.9211	0.0321022	33.7902	0.0662206	2.44866	0.00384898	1.08067	0.00223711	30.3135	1.47076	0.0553948	0.00257857
185985	8	13.8193	0.0532173	14.8899	0.0592016	33.8703	0.088349	2.44848	0.00410356	1.07628	0.00228064	36.9495	1.07106	0.0400679	0.00240325
185985	9	13.8207	0.0613902	14.8875	0.0460142	34.0015	0.187581	2.45676	0.00897624	1.07725	0.0023998	27.133	1.99245	0.0628214	0.00298069
185985	10	13.7332	0.0484079	14.9045	0.0372424	33.6374	0.0992017	2.4494	0.00698057	1.08531	0.00259938	40.5919	0.825582	0.0407081	0.000804491
185985	11	13.8021	0.0426909	14.9031	0.0372038	33.7488	0.0872488	2.44526	0.00469603	1.07981	0.00244714	22.8091	0.290371	0.065833	0.00153715
185985	12	13.7045	0.0577578	14.887	0.0858296	33.5322	0.154507	2.44682	0.0079909	1.08629	0.00495063	29.4909	1.36134	0.0566897	0.00254758
185985	13	13.7569	0.06744	14.8957	0.0582091	33.8011	0.140956	2.45706	0.00613887	1.0828	0.0031618	53.5457	0.50024	0.0391057	0.00157135
185985	14	13.7588	0.0776403	14.8874	0.0927531	33.663	0.195118	2.44665	0.00478606	1.08203	0.00409196	26.8703	0.451153	0.057328	0.00138423
185985	15	13.785	0.0779493	14.9106	0.0904061	33.6886	0.185634	2.4439	0.00820425	1.08166	0.00390705	36.7194	1.40984	0.0470395	0.0017105
185985	16	13.7786	0.045191	14.8808	0.0389942	33.6693	0.0875195	2.44546	0.00298076	1.08096	0.00151935	41.7677	2.43555	0.0361075	0.00202915
185985	17	13.7284	0.0690606	14.8732	0.0650584	33.5676	0.163023	2.44514	0.00485931	1.0834	0.00245241	42.1022	1.15125	0.0341203	0.00203041
185985	18	13.7415	0.14024	14.8952	0.164434	33.5977	0.314615	2.44504	0.00719276	1.08394	0.00273193	31.0479	0.589897	0.0521754	0.00204732
185985	19	13.7637	0.0611494	14.9178	0.0760144	33.6135	0.158444	2.44218	0.00616231	1.08384	0.00192916	38.5057	0.627891	0.0426353	0.00184367
185985	20	13.818	0.0555028	14.9248	0.0560778	33.8458	0.119072	2.44946	0.00581844	1.08013	0.00345256	28.0305	1.23599	0.0611364	0.00347937
185985	21	13.7938	0.104346	14.9372	0.110401	33.7218	0.27626	2.4447	0.00496545	1.0829	0.00303671	37.7337	2.2435	0.0401053	0.0033132
185985	22	13.7152	0.0654059	14.8841	0.0779748	33.5806	0.145849	2.44845	0.00395525	1.08523	0.00249359	37.0768	1.03835	0.0485152	0.00130105
185985	23	13.764	0.0380545	14.8629	0.0449931	33.5533	0.082478	2.43781	0.00384198	1.07985	0.00187624	28.4836	1.4492	0.0436945	0.00352741
185985	24	13.767	0.0448929	14.9214	0.0392848	33.6573	0.0846012	2.44485	0.00388354	1.08388	0.00197681	28.4403	1.02816	0.0550719	0.00257973
185985	25	13.7614	0.0400778	14.8741	0.0485677	33.6431	0.103665	2.44477	0.00385137	1.08087	0.00218493	30.3402	0.496223	0.0436871	0.00105175
178054	1	13.8272	0.117405	14.8769	0.157093	33.5544	0.340592	2.42669	0.011068	1.0759	0.00458967	60.5439	0.546987	0.0256154	0.000978872
178054	2	13.6695	0.0298117	14.805	0.0344691	33.3911	0.067106	2.44275	0.00166697	1.08307	0.000863596	73.6804	3.6856	0.0263676	0.00157149
178054	3	13.6567	0.0887054	14.757	0.0469081	33.3458	0.186337	2.44172	0.00221556	1.08057	0.00358394	46.026	0.378341	0.0286349	0.00136939
178054	4	13.7697	0.0876741	14.8141	0.0946793	33.4522	0.21284	2.42941	0.00311521	1.07585	0.0021799	59.1356	0.753833	0.0269087	0.00045176
178054	5	13.7189	0.0694978	14.8707	0.0728388	33.5942	0.165894	2.44876	0.00156077	1.08396	0.00187353	59.3533	1.85485	0.0241509	0.00154194
178054	6	13.8034	0.0954426	14.9681	0.102112	33.7842	0.227748	2.44754	0.00107778	1.08438	0.000956024	64.7015	3.4997	0.0229267	0.00204416
178054	7	13.7395	0.111564	14.8933	0.126551	33.6233	0.296983	2.44718	0.00252437	1.08398	0.0020543	58.9849	1.69286	0.0229967	0.00141265
178054	8	13.7489	0.0798704	14.8245	0.112057	33.5164	0.226645	2.43774	0.00379703	1.07822	0.00271017	47.0732	0.419273	0.0258848	0.00114594
178054	9	13.7631	0.0608841	14.8582	0.0633179	33.5634	0.134537	2.43866	0.00461136	1.07957	0.00199595	49.5514	1.10986	0.0245591	0.00126244
178054	10	13.656	0.0758363	14.8039	0.0814437	33.4265	0.19166	2.44776	0.00286705	1.08407	0.0018713	51.8628	0.676859	0.0252475	0.00101079
178054	11	13.7746	0.108147	14.782	0.10381	33.3995	0.224394	2.42479	0.0133007	1.07316	0.00557682	43.6894	1.62049	0.0279906	0.00107241
178199	1	13.7765	0.217277	14.8492	0.240992	33.3701	0.542468	2.42223	0.00190619	1.07786	0.00128783	104.528	7.64921	0.0151949	0.00081135
178199	2	13.8114	0.11668	14.877	0.114016	33.4305	0.263327	2.42052	0.00258054	1.07716	0.00225345	68.7084	0.959019	0.0251944	0.000400216
178199	3	13.7225	0.044263	14.8314	0.0561724	33.3465	0.107703	2.43006	0.002104	1.0808	0.00134985	121.951	1.7516	0.0140697	0.000468217
178199	4	13.8448	0.0928029	14.9005	0.102155	33.522	0.197068	2.4214	0.00727677	1.07628	0.00345107	28.1247	1.34745	0.05574	0.00450027
178199	5	13.7521	0.0404719	14.8137	0.0405492	33.2839	0.0887963	2.42028	0.00175715	1.0772	0.000723439	166.347	3.57198	0.00994391	0.00027803
178199	6	13.7911	0.152739	14.8859	0.158447	33.47	0.364852	2.42693	0.00296104	1.0794	0.00191935	96.3659	4.2724	0.0174573	0.00120391
178199	7	13.7823	0.0447243	14.8751	0.0406323	33.4654	0.10811	2.42815	0.00195178	1.08023	0.0012542	57.7677	3.87297	0.0308243	0.0017756
178199	8	13.8594	0.0575765	14.87	0.0637894	33.3868	0.140019	2.40898	0.00247865	1.07292	0.00118898	76.3554	0.905895	0.0244957	0.000468189
178199	9	13.892	0.0734172	14.9462	0.0734299	33.5771	0.165202	2.41703	0.0025306	1.0759	0.00154874	65.1367	4.64096	0.029624	0.00270184
178199	10	13.9402	0.0491398	14.9262	0.0487841	33.5051	0.115504	2.40351	0.00421781	1.07075	0.00175993	73.9257	3.61115	0.0267396	0.00135531
178199	11	13.7774	0.0614624	14.8423	0.0697729	33.37	0.142349	2.4221	0.00433549	1.0773	0.00171176	104.524	1.97986	0.0153772	0.000305557
178199	12	13.797	0.0482124	14.8915	0.0499252	33.4435	0.0974516	2.42398	0.00387996	1.07934	0.00217618	75.0981	1.85201	0.0222911	0.0006751
178199	13	13.749	0.108397	14.8443	0.123182	33.3411	0.27047	2.42497	0.00160247	1.07965	0.00113535	110.513	3.3298	0.015334	0.000368321
178199	14	13.9042	0.169915	14.8862	0.164645	33.4075	0.333896	2.40274	0.00662229	1.07064	0.00140124	81.4497	2.70488	0.0192484	0.00126862
178199	15	13.9045	0.09679	14.9548	0.110138	33.5674	0.242855	2.41413	0.00262664	1.07553	0.00113266	106.845	4.4104	0.015448	0.0012729
178199	16	13.9171	0.0845983	14.9012	0.0842181	33.446	0.223197	2.40323	0.00502799	1.07073	0.00418566	54.3885	0.903714	0.0351279	0.000953981
178199	17	13.8427	0.0443423	14.9294	0.0496889	33.542	0.110757	2.42308	0.0019357	1.07851	0.00110524	47.6123	3.08498	0.0386128	0.00230313
178199	18	13.8933	0.101975	14.92	0.0993647	33.5018	0.219139	2.4114	0.00631664	1.07392	0.00357293	30.9775	0.455101	0.0580759	0.00149248
178199	19	13.8866	0.1098	14.9653	0.117525	33.609	0.265933	2.42024	0.00133154	1.07768	0.000772192	146.251	4.06233	0.0111565	0.000249459
178199	20	13.8277	0.0270566	14.8862	0.0247502	33.4364	0.0461734	2.41672	0.00218575	1.07599	0.00111851	56.7369	1.67886	0.0290906	0.000873565
214243	1	13.643	0.0459445	14.7878	0.0458541	33.3339	0.108093	2.44333	0.00302084	1.08393	0.00147265	51.306	2.20867	0.0318712	0.00111698
214243	2	13.5877	0.115823	14.7314	0.139456	33.2438	0.292243	2.4466	0.0034203	1.08415	0.0016975	49.9784	0.587288	0.0261015	0.000809014
214243	3	13.6462	0.0598879	14.7683	0.0682081	33.3165	0.141489	2.44149	0.00269495	1.08223	0.00169922	33.0173	0.704853	0.0504831	0.00138666
214243	4	13.6084	0.251083	14.6941	0.261219	33.1771	0.5512	2.43813	0.00755314	1.0798	0.0022593	49.9622	0.708016	0.0287628	0.00163145
214243	5	13.536	0.036889	14.6749	0.0391401	33.0962	0.0868429	2.44506	0.00206012	1.08415	0.00101321	67.7972	0.641586	0.0180097	0.000411147
214243	6	13.6074	0.080806	14.7196	0.0790444	33.2678	0.193261	2.44487	0.00130472	1.08313	0.000720451	85.7916	3.9934	0.0159641	0.000953446
214243	7	13.5312	0.0354705	14.6786	0.0355557	33.1012	0.0727669	2.44633	0.00312673	1.08481	0.00169569	42.6894	0.750087	0.0307417	0.000661522
214243	8	13.6025	0.0863479	14.7432	0.0921785	33.2769	0.208885	2.44608	0.00127758	1.08387	0.000768175	89.7446	3.93671	0.0156277	0.000713574
214243	9	13.5795	0.0395022	14.7117	0.0398901	33.2098	0.0883462	2.44562	0.00225014	1.08339	0.00116195	46.6672	0.884162	0.0258948	0.000894762
214243	10	13.6014	0.076684	14.7415	0.0805264	33.2727	0.176396	2.44634	0.0026337	1.08384	0.0011502	51.7295	2.65341	0.025911	0.00157882
214243	11	13.6063	0.0519304	14.7518	0.0549905	33.2807	0.124499	2.44596	0.00173471	1.08409	0.000830004	74.8665	2.83517	0.0180228	0.00096501
214243	12	13.5501	0.0378858	14.6822	0.0432583	33.1277	0.094635	2.44484	0.00237325	1.08355	0.00143639	50.5375	1.13249	0.0238246	0.000915247
214243	13	13.568	0.0465369	14.6932	0.0480399	33.1338	0.100483	2.44391	0.00199203	1.08294	0.00100505	73.4352	2.22346	0.0194109	0.000868083
214243	14	13.5966	0.0409133	14.7172	0.0351602	33.2094	0.0777617	2.44334	0.0028318	1.08284	0.00142539	40.6943	0.830731	0.0305313	0.00107993
214243	15	13.6394	0.049163	14.7687	0.0543427	33.3198	0.133753	2.4429	0.00457569	1.0828	0.00246712	32.24	1.35743	0.0382325	0.00181466
214243	16	13.5749	0.0279126	14.6901	0.0277473	33.2068	0.0602513	2.44623	0.00238267	1.08217	0.00157801	52.9569	0.552352	0.0247334	0.000576842
214243	17	13.6094	0.0493857	14.7476	0.0530644	33.2833	0.117705	2.44563	0.00239661	1.08365	0.00120366	62.2386	2.11466	0.0217686	0.00110152
214243	18	13.6297	0.0625089	14.7662	0.0689659	33.3253	0.153705	2.44513	0.00271097	1.08341	0.001394	44.286	2.01121	0.0294335	0.00154862
214243	19	13.5417	0.0467457	14.6717	0.0489372	33.1294	0.105808	2.44652	0.00234456	1.08346	0.00122339	53.6045	0.770896	0.0243521	0.000547075
214243	20	13.5764	0.0559103	14.7156	0.0585321	33.2057	0.130649	2.44587	0.00183772	1.08422	0.000919394	55.6161	2.33385	0.0227953	0.00100374
214243	21	13.5937	0.0487496	14.73	0.0489428	33.2525	0.108221	2.44611	0.00200035	1.08353	0.00105594	56.7877	1.50896	0.0248257	0.000745833
214243	22	13.5846	0.0520421	14.7244	0.0562986	33.2323	0.122554	2.44644	0.0014778	1.08405	0.000658082	81.6346	3.07153	0.0150599	0.000675366
214243	23	13.5418	0.0356219	14.6885	0.0383511	33.115	0.0811938	2.44542	0.00275776	1.08469	0.00140197	52.9436	0.848883	0.0240628	0.000739495
214243	24	13.604	0.0461268	14.7606	0.0530006	33.3414	0.111995	2.45086	0.00181463	1.08501	0.00103673	61.5687	1.73716	0.0209765	0.000552449
214243	25	13.5944	0.199318	14.745	0.223686	33.3106	0.484131	2.45033	0.00453641	1.08464	0.00409564	54.6486	2.23355	0.0261745	0.000825676
214243	26	13.5911	0.0313005	14.7419	0.0356965	33.2909	0.0748423	2.44948	0.00174366	1.08468	0.000898495	80.5437	1.83373	0.0166786	0.000580414
214243	27	13.6062	0.0619819	14.7541	0.0640697	33.3207	0.141491	2.44901	0.00376833	1.08441	0.00215525	39.8665	0.632581	0.0323121	0.000603786
214243	28	13.6118	0.109035	14.75	0.116997	33.3079	0.256083	2.44705	0.00654702	1.08365	0.00377045	37.1158	0.801385	0.0385367	0.000911339
214243	29	13.6429	0.0409678	14.8071	0.0451344	33.4189	0.0928859	2.44959	0.00379451	1.08536	0.00241274	32.3395	0.362346	0.0368584	0.000706078
214243	30	13.6185	0.0524444	14.7679	0.0588077	33.3666	0.13168	2.45008	0.00188424	1.0844	0.00102864	78.5256	2.78194	0.0176819	0.000811377
214243	31	13.604	0.0587526	14.7509	0.0638317	33.304	0.143828	2.44812	0.00323594	1.08432	0.00194185	48.2665	1.24129	0.0282865	0.000753265
214243	32	13.6363	0.108146	14.8083	0.0987455	33.4799	0.219191	2.45534	0.00675214	1.08601	0.00358674	25.0131	0.186452	0.0514619	0.00106398
214243	33	13.5902	0.0282037	14.7369	0.030343	33.2829	0.0634243	2.44904	0.00184017	1.08439	0.001053	79.1899	1.57095	0.0168426	0.000528263
214243	34	13.6426	0.0782207	14.7927	0.0785295	33.4107	0.181656	2.44904	0.00421773	1.08433	0.00211559	50.2404	0.940645	0.0281774	0.000558576
214243	35	13.586	0.0475144	14.7315	0.0441164	33.2853	0.112671	2.44999	0.00167289	1.08511	0.000930148	69.7499	1.22444	0.0207199	0.000515869
214243	36	13.6172	0.0425877	14.7779	0.0438541	33.3636	0.0975819	2.45014	0.00278322	1.08526	0.00148276	48.0282	0.766542	0.0263431	0.00076866
214243	37	13.6033	0.0512696	14.7604	0.0561418	33.3226	0.124788	2.44961	0.0019009	1.08507	0.00100179	69.733	3.54962	0.0201761	0.00102158
214243	38	13.5762	0.0497718	14.7229	0.0613148	33.288	0.132097	2.45194	0.00464628	1.08447	0.00269329	48.3721	0.669629	0.024377	0.000590024
224395	1	13.7309	0.245113	14.8556	0.26726	33.5594	0.599005	2.44406	0.0121916	1.08173	0.00590223	59.2121	18.8285	0.081657	0.00531136
224395	2	13.7683	0.2396	14.8607	0.256019	33.5612	0.617469	2.43921	0.0189123	1.07937	0.00824112	41.0937	6.23898	0.0750623	0.00421424
224395	3	13.7283	0.25435	14.8185	0.287629	33.5073	0.604983	2.44059	0.0169325	1.0793	0.00852797	42.4992	7.19626	0.0552967	0.0046815
224395	4	13.7078	0.369706	14.8137	0.342863	33.4687	0.834313	2.44162	0.0150634	1.08071	0.00627857	67.1621	3.12272	0.0314056	0.00215404
224395	5	13.7354	0.246363	14.8312	0.273121	33.4963	0.587967	2.43869	0.013921	1.07978	0.00771885	50.8148	13.993	0.0345911	0.00942941
224395	6	13.7115	0.169351	14.8205	0.210482	33.5048	0.524325	2.44356	0.0206542	1.08089	0.00712759	35.1209	0.933503	0.0479305	0.00266296
224395	7	13.7522	0.246027	14.8329	0.256213	33.5274	0.604623	2.43798	0.0176908	1.0786	0.0089202	38.7378	2.16658	0.0471088	0.00301966
224395	8	13.7509	0.269328	14.8674	0.263472	33.5963	0.57763	2.44326	0.0175988	1.08146	0.00842507	43.5687	14.0089	0.0579588	0.0105007
224395	9	13.7307	0.230439	14.8291	0.235275	33.5462	0.528171	2.44317	0.0129775	1.08001	0.00659968	58.9761	30.272	0.0297231	0.0144373
224395	10	13.7073	0.260263	14.8208	0.274343	33.5008	0.653123	2.44402	0.0106894	1.08125	0.00648193	58.6905	9.14362	0.0411403	0.00417452
224395	11	13.7618	0.265467	14.8433	0.292904	33.5802	0.664836	2.4401	0.0151909	1.07859	0.00891864	43.6982	9.1573	0.0603548	0.00836794
224395	12	13.7514	0.241855	14.8525	0.269251	33.5482	0.577474	2.43964	0.0149407	1.08008	0.0087902	36.7171	1.64629	0.0796534	0.00447354
224395	13	13.7386	0.216946	14.8624	0.243204	33.555	0.530146	2.44393	0.0192172	1.08248	0.00857694	33.771	8.34225	0.0694205	0.00860726
224395	14	13.7306	0.239858	14.8373	0.257032	33.5298	0.59438	2.44189	0.008279	1.08058	0.00482468	74.9092	16.3358	0.0432227	0.00432786
224395	15	13.7331	0.278118	14.8489	0.298124	33.5574	0.665281	2.44356	0.0112033	1.08125	0.0058622	65.6865	29.6809	0.0705143	0.0141104
98260	1	13.7717	0.0623822	14.8746	0.0940032	33.5386	0.216116	2.43531	0.00726381	1.08008	0.00332828	43.2201	0.640595	0.0286754	0.000770473
98260	2	13.7491	0.138124	14.8571	0.116584	33.509	0.294199	2.43721	0.00347517	1.08062	0.00261513	40.7384	0.444055	0.030575	0.00121382
98260	3	13.744	0.051776	14.8783	0.0466701	33.4921	0.142508	2.43686	0.00370274	1.08253	0.00120445	47.029	1.40157	0.0263409	0.000541866
98260	4	13.8204	0.063496	14.94	0.0406373	33.6415	0.128967	2.4342	0.00513108	1.08102	0.00270491	50.4805	1.24818	0.0245067	0.00135304
98260	5	13.8407	0.0798581	14.9243	0.101287	33.6572	0.176749	2.43176	0.00221566	1.07828	0.00161457	53.2765	0.967901	0.0246189	0.00137239
98260	6	13.7714	0.0276492	14.8498	0.0369946	33.5321	0.0488443	2.43491	0.00159926	1.07831	0.00149595	41.9254	0.440294	0.0285122	0.000741584
98260	7	13.7808	0.0693934	14.9024	0.0654287	33.6013	0.139501	2.43829	0.00293134	1.0814	0.00184145	49.019	0.73703	0.0250562	0.00116816
98260	8	13.8117	0.0653398	14.862	0.0601134	33.5544	0.138445	2.42945	0.00324195	1.07606	0.00192773	47.9805	1.36592	0.0288463	0.00129943
98260	9	13.845	0.17741	14.9119	0.160756	33.5925	0.415627	2.42636	0.0092761	1.0771	0.00487142	38.4892	4.23632	0.0300049	0.00419227
98260	10	13.8141	0.0763797	14.9277	0.0999901	33.6347	0.188068	2.4348	0.0038555	1.0806	0.00198735	45.569	1.52954	0.0276054	0.00157233
98260	11	13.754	0.0581351	14.857	0.0645141	33.485	0.124508	2.43459	0.00286111	1.0802	0.00151378	47.2252	1.51153	0.026041	0.000710921
98260	12	13.8078	0.0781476	14.9494	0.0572453	33.6408	0.139473	2.4364	0.0106297	1.08269	0.00327717	46.6546	1.00873	0.023891	0.000770326
98260	13	13.7614	0.0254839	14.8621	0.0461178	33.478	0.0688316	2.43274	0.00502161	1.07998	0.00283931	49.3436	1.10689	0.0235515	0.000658392
98260	14	13.8473	0.0370593	14.8956	0.040668	33.6696	0.075207	2.43151	0.00354433	1.07571	0.00185008	40.4748	1.12005	0.0272944	0.00160999
98260	15	13.8009	0.0533309	14.8988	0.0737529	33.5614	0.136369	2.43184	0.00686163	1.07956	0.00340465	43.577	1.43056	0.0225384	0.00168168
98260	16	13.7957	0.0393153	14.8925	0.0535836	33.574	0.105194	2.43366	0.00162709	1.0795	0.0011958	54.0553	4.01809	0.0183731	0.000647099
98260	17	13.8142	0.0599674	14.8836	0.0711406	33.5678	0.156918	2.42996	0.00496713	1.07741	0.00126823	40.4636	1.58656	0.0274056	0.00271079
98260	18	13.8488	0.0960322	14.9297	0.11007	33.655	0.213502	2.43019	0.00389285	1.07805	0.00116553	48.0837	2.37675	0.0268302	0.00119244
98260	19	13.8344	0.0749379	14.8927	0.0888917	33.6243	0.19264	2.43048	0.00419688	1.07649	0.00238731	43.545	0.174658	0.0233716	0.00102655
98260	20	13.7346	0.0720679	14.8379	0.0651786	33.4432	0.138073	2.43499	0.00502246	1.08034	0.00229777	37.8828	1.67366	0.0282507	0.000525723
98260	21	13.8181	0.105435	14.9017	0.135372	33.6055	0.254044	2.432	0.00460839	1.07841	0.00344255	35.8107	0.661094	0.0291674	0.001966
98260	22	13.842	0.113664	14.9254	0.0876338	33.6333	0.198768	2.42983	0.00593509	1.07828	0.00268487	44.0894	1.2221	0.0250271	0.00196188
98260	23	13.8418	0.0451217	14.9406	0.0552415	33.6536	0.132459	2.43129	0.00350604	1.07938	0.00164544	45.3732	3.53852	0.0274644	0.00294321
98260	24	13.8269	0.0405299	14.9262	0.0390572	33.6506	0.0838667	2.43374	0.00285053	1.07952	0.00146227	44.8288	3.58824	0.027432	0.00267711
98260	25	13.8302	0.0759618	14.9426	0.0850073	33.6831	0.190895	2.43548	0.00312682	1.08043	0.00180221	47.8184	0.700903	0.0224914	0.00101003
168901	1	13.9093	0.0735408	15.1033	0.0743874	33.9274	0.133579	2.43973	0.0114337	1.08603	0.00519708	37.0386	1.23566	0.0470349	0.00154878
168901	2	13.9443	0.205487	15.1638	0.231253	34.084	0.431672	2.44473	0.0229641	1.08783	0.0186144	29.9266	0.38751	0.0575426	0.00306928
168901	3	13.8099	0.0814702	15.0338	0.0801164	33.7318	0.146072	2.44303	0.00870407	1.08878	0.00439186	48.1963	1.29657	0.0347089	0.00193005
168901	4	13.8851	0.124053	15.1439	0.105139	33.9031	0.244607	2.44216	0.0127663	1.09095	0.00735334	46.2357	0.988305	0.0372338	0.00134368
168901	5	13.8735	0.101278	15.0567	0.106071	33.9173	0.16583	2.44071	0.0160816	1.08526	0.0094923	26.4999	0.368051	0.0637767	0.00142922
168901	6	13.8905	0.0921807	15.0887	0.10222	33.8574	0.205755	2.4377	0.00734399	1.08639	0.0050658	54.1883	3.0126	0.0327332	0.00230246
168901	7	13.923	0.229445	15.1436	0.270317	33.7384	0.465882	2.42427	0.0285383	1.08805	0.0162879	28.3623	0.397416	0.0598025	0.00272803
168901	8	13.8339	0.10364	15.0493	0.132383	33.7891	0.252318	2.44016	0.0090812	1.0879	0.00569158	43.0113	2.77309	0.0376039	0.00237402
168901	9	13.8888	0.0938809	15.0816	0.103866	33.8759	0.211711	2.43928	0.00626377	1.08493	0.00374501	61.7407	4.3601	0.0268648	0.00217555
168901	10	13.8673	0.106957	15.0724	0.0998105	33.7267	0.16691	2.4335	0.0180685	1.08744	0.00859233	33.4867	0.623183	0.0435111	0.00134741
168901	11	13.8985	0.18854	15.1265	0.162427	33.8576	0.375858	2.43689	0.0170149	1.08879	0.0084617	33.3689	1.14737	0.0509602	0.00306078
168901	12	13.8384	0.0731929	15.062	0.0862829	33.7481	0.189469	2.43884	0.00805005	1.08849	0.00416968	58.5827	3.45358	0.0288103	0.00202767
168901	13	13.9121	0.158585	15.1083	0.124975	33.7774	0.289486	2.42857	0.016838	1.08637	0.00939786	41.1779	1.00247	0.038347	0.00198862
168901	14	13.7886	0.0882085	15.0109	0.114286	33.6309	0.228575	2.43586	0.0131943	1.08725	0.00720309	38.6046	1.0005	0.0367305	0.0017764
168901	15	13.9053	0.0856483	15.1029	0.0820236	33.8784	0.146783	2.43448	0.00955643	1.08483	0.00523804	42.6515	2.022	0.0413825	0.0022374
168901	16	13.8928	0.0840295	15.1042	0.103506	33.8636	0.162368	2.43803	0.0112141	1.08747	0.00768273	36.1017	0.742847	0.0465477	0.00157193
168901	17	13.8881	0.0896109	15.0787	0.103406	33.8271	0.193532	2.43637	0.0141929	1.08609	0.00818123	31.5458	0.661615	0.0496493	0.0019381
168901	18	13.8636	0.076228	15.0629	0.0800978	33.7659	0.139667	2.4337	0.0101079	1.0868	0.0068567	44.118	2.45298	0.0402308	0.00291505
168901	19	13.9078	0.0685291	15.0853	0.0662944	33.9181	0.141703	2.43902	0.00682923	1.087	0.00390642	59.7769	4.71316	0.0300279	0.00222449
168901	20	13.9082	0.12952	15.1568	0.12345	34.0812	0.246169	2.44085	0.0222079	1.0874	0.00830246	27.371	2.62289	0.0703105	0.00673079
168901	21	13.9705	0.125924	15.1077	0.135484	33.911	0.255297	2.42811	0.011504	1.08351	0.00692354	33.7181	3.05783	0.0589678	0.00471132
168901	22	13.8408	0.240993	15.1223	0.26399	33.6438	0.385228	2.43233	0.0321362	1.09306	0.016544	20.3489	0.382721	0.0692502	0.00327374
168901	23	13.9205	0.113577	15.0578	0.0974389	33.7808	0.21261	2.43104	0.0101768	1.08206	0.00567971	38.3039	1.32383	0.0448671	0.0019688
168901	24	13.8439	0.348589	15.0808	0.367715	33.8682	0.519052	2.44849	0.0401877	1.09016	0.025517	21.5159	0.683768	0.0708458	0.00362381
168901	25	13.9371	0.149519	15.1541	0.15016	34.0473	0.284205	2.44446	0.0231407	1.08827	0.0142476	23.4992	1.02299	0.0808281	0.00442697
168901	26	13.9287	0.15984	15.0947	0.151726	33.878	0.306897	2.43381	0.0171935	1.08435	0.00843157	25.3294	0.864855	0.0538736	0.0026618
168901	27	13.8651	0.14507	14.9924	0.125967	33.6742	0.288262	2.42921	0.0126441	1.08161	0.00730276	57.9488	3.75951	0.027391	0.00238876
168901	28	13.9298	0.118486	15.1281	0.122322	33.8337	0.218853	2.42971	0.011753	1.08639	0.00740873	34.4434	1.99961	0.0478328	0.00275932
168901	29	13.8536	0.0951543	15.0163	0.109613	33.7313	0.186988	2.43558	0.013385	1.08246	0.00793644	35.2044	1.68991	0.0525806	0.00228259
168901	30	13.8737	0.113212	15.0345	0.103286	33.7195	0.197554	2.43017	0.0148381	1.08175	0.00858112	33.206	2.03645	0.0472298	0.00303952
168901	31	13.9339	0.127428	15.1196	0.130176	33.9906	0.184804	2.43738	0.0152448	1.08555	0.00815634	34.8017	2.56739	0.0491994	0.00399578
207524	1	13.8608	0.0854047	14.935	0.103792	33.6138	0.221447	2.42504	0.00349634	1.07744	0.00179728	105.172	5.03624	0.0219537	0.00101222
207524	2	13.8361	0.0543113	14.9008	0.0653613	33.5065	0.131696	2.41958	0.00588471	1.076	0.00274162	66.8436	1.45192	0.0283469	0.000927572
207524	3	13.8257	0.0667296	14.8961	0.0736926	33.5078	0.152309	2.42368	0.00395389	1.07744	0.00194269	81.5993	1.20873	0.0234875	0.000679427
207524	4	13.8068	0.0759415	14.8764	0.0838745	33.4559	0.175197	2.42268	0.00540595	1.07731	0.00258967	78.892	1.65445	0.0235714	0.000771803
207524	5	13.8538	0.0894638	14.9431	0.103905	33.5633	0.222375	2.42277	0.00694827	1.07949	0.00305733	60.7827	1.75578	0.0302173	0.000965567
207524	6	13.815	0.0927495	14.8682	0.116853	33.4907	0.268413	2.42423	0.0101764	1.07626	0.00604874	75.0379	1.16626	0.0261246	0.00275404
207524	7	13.8848	0.12264	14.9767	0.129308	33.7246	0.285827	2.42901	0.00384376	1.0787	0.00233757	85.6777	3.51933	0.0212589	0.00112506
207524	8	13.9605	0.143291	14.9398	0.151594	33.6366	0.264009	2.40991	0.0141775	1.07036	0.0090359	41.5817	1.06078	0.0463916	0.00138961
207524	9	13.9123	0.100046	14.9453	0.0947216	33.7045	0.210554	2.42285	0.00932409	1.07438	0.00539528	49.7002	1.42312	0.0345391	0.00120092
207524	10	13.9451	0.164263	14.9938	0.173694	33.7312	0.413359	2.41883	0.0068751	1.07527	0.00433794	80.7396	2.84592	0.0229682	0.000977002
207524	11	13.9348	0.100974	14.9456	0.0783922	33.6636	0.192166	2.41634	0.0095503	1.07287	0.00525899	38.4233	0.780071	0.0472507	0.00110102
207524	12	13.858	0.0937795	14.9424	0.0966647	33.612	0.220827	2.42558	0.00551562	1.07834	0.0032855	69.5078	2.40361	0.0269519	0.000825635
207524	13	13.816	0.0651198	14.94	0.0648328	33.5284	0.118289	2.42712	0.00857215	1.08246	0.00410568	46.3643	0.632281	0.0384324	0.000759562
207524	14	13.8323	0.0529503	14.8716	0.0550981	33.4745	0.116208	2.42112	0.00401028	1.07566	0.00211184	82.7474	1.5441	0.0226464	0.000807077
207524	15	13.8465	0.0920812	14.9013	0.0870922	33.5226	0.19695	2.42003	0.004904	1.07558	0.00270855	77.5262	4.60486	0.024131	0.0016041
207524	16	13.8587	0.0975877	14.8899	0.106064	33.542	0.222014	2.42044	0.00484702	1.07446	0.00312208	73.9044	3.66969	0.0247679	0.00139062
207524	17	13.7899	0.0772113	14.8713	0.0858635	33.4416	0.184256	2.42514	0.00523863	1.07844	0.00274416	98.2373	3.40649	0.0179195	0.000812276
207524	18	13.8344	0.0688137	14.8772	0.0819697	33.4752	0.165886	2.41975	0.00472891	1.0754	0.00343295	93.2957	3.93587	0.0201793	0.00113519
207524	19	13.9047	0.167138	14.9469	0.160159	33.6365	0.38202	2.41927	0.00778098	1.07513	0.00470593	58.4953	4.04017	0.0348996	0.00213021
207524	20	13.8774	0.10316	14.9343	0.103375	33.5755	0.225903	2.41964	0.00407154	1.07625	0.00224987	100.363	3.17479	0.0170541	0.000693946
207524	21	13.9321	0.181002	14.9364	0.184906	33.5633	0.414197	2.40924	0.0161942	1.07214	0.00578303	62.1579	1.35481	0.0273274	0.0017407
207524	22	13.8417	0.0557769	14.874	0.0563526	33.4679	0.117289	2.41806	0.00586563	1.07466	0.00322537	71.6396	1.22608	0.0244714	0.00122412
207524	23	13.9542	0.0874799	14.9403	0.089038	33.6326	0.200524	2.4096	0.00283451	1.07029	0.00195068	101.338	6.69349	0.0204737	0.00147929
207524	24	13.9528	0.105201	14.9527	0.0953996	33.6715	0.211808	2.41358	0.0110871	1.07186	0.00638869	59.22	2.05145	0.0308485	0.00147558
207524	25	13.9262	0.0625331	14.9387	0.0619383	33.6546	0.12969	2.41688	0.00789519	1.0718	0.00459381	38.1055	0.438204	0.037342	0.000964319
207524	26	13.889	0.150578	14.9323	0.151198	33.582	0.350747	2.41798	0.00818416	1.07518	0.00440649	74.7745	3.33519	0.0207966	0.000844352
207524	27	13.9357	0.0865522	14.9842	0.0964709	33.6474	0.213892	2.4145	0.0042371	1.07525	0.00220316	98.8973	5.09631	0.0172249	0.00100184
207524	28	13.949	0.101064	14.9941	0.109119	33.6275	0.225209	2.41455	0.00397252	1.07495	0.00203726	85.8537	4.30641	0.0207854	0.000931321
207524	29	13.9118	0.103881	14.9821	0.111487	33.6048	0.229696	2.41574	0.00365129	1.07698	0.00256423	83.7417	2.76239	0.0215244	0.000863562
207524	30	13.8747	0.0756975	14.9187	0.0755999	33.5113	0.164168	2.41542	0.0033597	1.07532	0.0021815	102.817	4.52415	0.0179744	0.000879481
207524	31	13.9789	0.155399	14.9895	0.153679	33.7221	0.367986	2.41239	0.00453083	1.07234	0.00263075	94.5359	2.40285	0.0225417	0.000842348
198220	1	13.8177	0.079888	14.8794	0.0726359	33.5663	0.183393	2.42924	0.00442909	1.07685	0.00242113	46.2496	1.01242	0.0440217	0.00202547
198220	2	13.8615	0.0502961	14.9119	0.0479118	33.5905	0.111608	2.42334	0.00344281	1.07641	0.00167665	50.9134	2.11002	0.0468926	0.00231961
198220	3	13.8091	0.0473279	14.9044	0.0491755	33.5653	0.110223	2.43069	0.00194847	1.07933	0.00113815	65.4055	4.99311	0.0392841	0.00302246
198220	4	13.7836	0.0978543	14.87	0.102791	33.5242	0.228019	2.43221	0.00505847	1.07883	0.00266674	46.6175	0.688121	0.0519925	0.00194547
198220	5	13.839	0.0992438	14.9263	0.122335	33.6489	0.268021	2.43145	0.00643629	1.07856	0.00264071	48.0564	2.20946	0.042849	0.00335694
198220	6	13.8709	0.129179	14.9219	0.130846	33.6352	0.312853	2.42488	0.00659515	1.07577	0.00144464	48.9026	1.77305	0.0516471	0.00323743
198220	7	13.8239	0.0373056	14.8919	0.0351484	33.5491	0.0871838	2.42691	0.00280528	1.07727	0.00156573	41.3062	0.929559	0.0570261	0.00129187
198220	8	13.7979	0.0888743	14.884	0.0848632	33.5404	0.201092	2.43084	0.00307923	1.07873	0.00211694	77.4374	3.69039	0.0315018	0.00201185
198220	9	13.7835	0.0230135	14.8615	0.0270521	33.4538	0.0480045	2.42711	0.00158023	1.07821	0.000944507	56.938	1.81607	0.0398229	0.00190771
198220	10	13.7791	0.0308935	14.8579	0.0342719	33.4569	0.0740244	2.42809	0.0014953	1.07829	0.000734557	80.9401	2.41637	0.0304164	0.000892555
198220	11	13.777	0.0344627	14.8802	0.0471675	33.4843	0.0865065	2.43042	0.0013047	1.07947	0.000885145	62.0998	4.4094	0.0433761	0.00231927
198220	12	13.8295	0.0492334	14.9142	0.0670688	33.6189	0.14709	2.43095	0.00369729	1.07843	0.00191632	59.8861	2.33656	0.040703	0.00219657
198220	13	13.7703	0.109922	14.8784	0.136225	33.512	0.276545	2.43363	0.00305541	1.08045	0.00257648	57.495	3.25524	0.0381368	0.00157973
198220	14	13.8253	0.175565	14.9275	0.174413	33.6672	0.441852	2.43519	0.00901945	1.07978	0.0040889	24.4202	0.598575	0.0872822	0.002159
198220	15	13.8414	0.0392826	14.8943	0.0412342	33.5627	0.089381	2.42482	0.00164304	1.07607	0.000840502	70.8079	4.46012	0.0335889	0.00274114
198220	16	13.8548	0.0909723	14.9125	0.106369	33.6511	0.25778	2.42883	0.00866309	1.07634	0.00385472	30.696	0.488172	0.0702877	0.00140239
198220	17	13.8071	0.0271678	14.9037	0.0248837	33.5844	0.0614984	2.43242	0.00266233	1.07943	0.00126072	40.9912	1.67307	0.0596963	0.00278896
198220	18	13.8642	0.0880885	14.9312	0.0860649	33.6719	0.191228	2.42872	0.00529828	1.07697	0.00198033	48.1064	0.97465	0.0516448	0.0011095
198220	19	13.8268	0.058446	14.895	0.0527442	33.5652	0.121517	2.42759	0.00372446	1.07728	0.00196065	37.451	0.348139	0.059444	0.000841499
198220	20	13.8259	0.0479211	14.8949	0.0588497	33.6052	0.105732	2.43062	0.00630521	1.07732	0.00287463	33.9222	0.563634	0.0666058	0.00206835
198220	21	13.8518	0.0330308	14.9224	0.03647	33.6157	0.0822303	2.42732	0.00139339	1.07765	0.000738693	70.5126	4.91947	0.033028	0.00204834
198220	22	13.8164	0.0271074	14.9056	0.028541	33.5525	0.0636788	2.42847	0.00199311	1.07855	0.000985563	48.2321	1.14369	0.0415749	0.00140237
198220	23	13.8434	0.0726404	14.9014	0.102604	33.6799	0.277005	2.43288	0.0101531	1.07644	0.00649449	26.7403	0.734169	0.0705252	0.00245769
198220	24	13.8338	0.0302221	14.9243	0.0333533	33.6112	0.0638344	2.42967	0.0023421	1.07884	0.00132453	55.6192	3.14167	0.0441302	0.00280137
198220	25	13.883	0.0307461	14.9285	0.0276697	33.6339	0.0607984	2.4227	0.00260315	1.07532	0.00167684	39.7295	0.563806	0.0470593	0.00162227
198220	26	13.8794	0.043978	14.9265	0.0388981	33.6305	0.0851105	2.42308	0.0037818	1.07546	0.00236356	39.636	0.828892	0.0473052	0.00236408
198220	27	13.8868	0.0444659	14.9306	0.0408321	33.6376	0.0901419	2.42229	0.00369213	1.07518	0.00246711	39.8297	0.787073	0.0467959	0.00229166
185997	1	13.7765	0.0286109	14.9143	0.0322335	33.6228	0.0723964	2.4406	0.00153687	1.0826	0.000876703	81.3157	2.69706	0.0244305	0.00158129
185997	2	13.7931	0.0346697	14.9163	0.0364763	33.6493	0.0865264	2.43957	0.00163723	1.08143	0.000580999	89.1022	0.998607	0.0204217	0.000993379
185997	3	13.86	0.0339407	14.9215	0.0735663	33.6766	0.125504	2.42976	0.00496727	1.07658	0.00313396	33.3443	2.49597	0.0525457	0.00370562
185997	4	13.8076	0.0297856	14.9235	0.0333568	33.6408	0.0719761	2.4364	0.00102011	1.08082	0.000572271	145.096	7.38866	0.0134233	0.00106029
185997	5	13.837	0.034694	14.9548	0.0336675	33.6987	0.0754198	2.43542	0.00188737	1.08079	0.000902835	84.591	10.6414	0.0248254	0.00340111
185997	6	13.7425	0.0507615	14.867	0.0724127	33.5475	0.124657	2.44116	0.00516094	1.08182	0.0016793	48.1931	0.782399	0.0368706	0.0017466
185997	7	13.8089	0.0513719	14.9346	0.119762	33.552	0.199763	2.42974	0.00558242	1.08152	0.0046697	25.578	1.14821	0.0676265	0.00397157
185997	8	13.8701	0.0962208	14.9548	0.10514	33.7462	0.220643	2.43303	0.00497749	1.07821	0.00284947	63.2573	2.42168	0.0260656	0.00261028
185997	9	13.8229	0.117182	14.9508	0.12837	33.718	0.311961	2.43927	0.00334495	1.0816	0.000822946	77.2234	2.82419	0.021194	0.0019625
185997	10	13.755	0.140926	14.8802	0.173433	33.5913	0.271176	2.44218	0.00778681	1.08179	0.00271457	27.2688	1.56222	0.0634267	0.00552472
185997	11	13.8503	0.046263	14.9121	0.0325784	33.6234	0.0766352	2.4277	0.00385327	1.07669	0.00199177	106.208	5.10678	0.0164844	0.00128805
207530	1	13.8619	0.118745	15.0118	0.110539	33.7325	0.169497	2.43395	0.0161177	1.08308	0.00628214	44.4617	1.05672	0.0374438	0.00133402
207530	2	13.8532	0.155029	14.9898	0.140968	33.6873	0.306075	2.43198	0.0133457	1.08216	0.00673957	43.1135	0.732104	0.0380031	0.00152223
207530	3	13.9072	0.129186	14.9994	0.145164	33.7627	0.296173	2.42786	0.0115376	1.07861	0.00733043	61.5617	1.7676	0.0274236	0.00118935
207530	4	13.9011	0.171634	14.9969	0.211113	33.7551	0.435126	2.4283	0.0120137	1.07881	0.00678251	48.6144	0.808953	0.0363212	0.00157841
207530	5	13.8716	0.0876896	14.9911	0.111281	33.6768	0.180273	2.42795	0.010195	1.08072	0.00516814	46.0305	0.744276	0.0368109	0.000950851
207530	6	13.8954	0.108448	14.9535	0.104957	33.7383	0.231161	2.42822	0.0123414	1.07624	0.00616287	55.9287	1.17451	0.0332345	0.00190153
207530	7	13.8898	0.07637	14.9933	0.0889881	33.7522	0.128673	2.43058	0.0108941	1.07971	0.00692546	32.5498	0.632975	0.0524086	0.00160701
207530	8	13.856	0.167249	14.9067	0.165437	33.6659	0.349082	2.43006	0.0103374	1.07597	0.0054847	58.622	1.55847	0.029796	0.00128607
207530	9	13.9105	0.0572407	15.023	0.0572668	33.7484	0.122848	2.42391	0.00760944	1.07793	0.00337717	51.935	2.87318	0.0377801	0.00238516
207530	10	13.9033	0.0984248	14.9948	0.0971084	33.7722	0.224745	2.4293	0.00742297	1.07864	0.00384466	49.4094	0.981057	0.0370637	0.000979103
207530	11	13.8307	0.141102	14.9386	0.115909	33.6757	0.322247	2.43498	0.00900165	1.08027	0.00553546	58.6528	1.37346	0.0289498	0.00108531
207530	12	13.8725	0.0910708	15.0114	0.0933906	33.7109	0.210051	2.43032	0.00887249	1.08124	0.00388024	38.9899	1.39479	0.0421722	0.00173343
207530	13	13.8851	0.0866535	14.937	0.0899665	33.8706	0.130259	2.43699	0.0109656	1.07589	0.00551552	40.4233	0.340796	0.038715	0.00125541
207530	14	13.852	0.059254	14.948	0.0651341	33.7318	0.122821	2.43542	0.00831375	1.07922	0.00421422	43.1891	0.421748	0.0430977	0.00113414
207530	15	13.8805	0.0884984	15.0048	0.0782887	33.8636	0.141434	2.44193	0.00962468	1.0796	0.00526758	46.962	1.73207	0.0389816	0.00169586
207530	16	13.8156	0.0736319	14.9449	0.0747834	33.7281	0.112152	2.4397	0.0102801	1.08196	0.00571424	35.0422	0.457394	0.0502111	0.00120289
207530	17	13.8807	0.0815814	15.0247	0.099084	33.888	0.198611	2.44158	0.00835976	1.08249	0.00466048	42.4531	2.42274	0.0474114	0.00246618
207530	18	13.8699	0.168684	14.9618	0.187685	33.7829	0.223445	2.43625	0.0244442	1.07887	0.0125476	35.2912	1.23233	0.0534016	0.00197419
207530	19	13.8664	0.0923073	15.0188	0.0923348	33.8576	0.21393	2.44189	0.00672724	1.08322	0.00336537	55.8586	2.91495	0.0329701	0.00186409
207530	20	13.9093	0.09623	15.0234	0.100874	33.8746	0.185602	2.43781	0.00765071	1.08022	0.0042744	46.0248	3.1322	0.0483099	0.00447223
207530	21	13.8231	0.0709794	14.9458	0.0704808	33.7755	0.150096	2.4408	0.00687065	1.08141	0.00401858	65.7844	2.91574	0.0321927	0.00134305
207530	22	13.8059	0.0845795	14.9271	0.0767154	33.6503	0.162012	2.43782	0.00895169	1.08139	0.00431222	47.0499	2.07471	0.0389711	0.00139398
207530	23	13.8345	0.0660182	14.9478	0.0587072	33.6993	0.143077	2.43615	0.00873533	1.07934	0.00394388	43.9539	0.78422	0.0411615	0.00126305
207530	24	13.8118	0.0938617	14.8888	0.103901	33.6249	0.180458	2.43835	0.0076983	1.07808	0.00450183	40.8542	0.591802	0.0387659	0.000824471
207530	25	13.9062	0.0876903	15.0065	0.0896974	33.8236	0.199586	2.43444	0.0079494	1.0793	0.00504844	39.3101	1.15578	0.0416306	0.00136974
207530	26	13.813	0.0840499	14.9521	0.0899055	33.6523	0.188439	2.43651	0.00716707	1.08256	0.00373246	49.0857	2.15904	0.0392086	0.00217016
207530	27	13.7885	0.0858813	14.897	0.068176	33.621	0.149704	2.43875	0.0101365	1.08059	0.00508525	45.9502	0.710073	0.0414504	0.00114645
207530	28	13.7969	0.138101	14.9175	0.157612	33.637	0.351588	2.43806	0.0103638	1.08127	0.00572974	45.0027	1.22887	0.0390247	0.00139815
207530	29	13.7979	0.0711531	14.9129	0.0648398	33.5809	0.118919	2.43229	0.0112258	1.08102	0.00523519	35.8036	0.565228	0.0460536	0.00120118
207530	30	13.7948	0.0776105	14.8889	0.0974206	33.5246	0.214536	2.43361	0.00649857	1.08082	0.00335073	57.7658	3.03392	0.033928	0.00189978
207530	31	13.8436	0.153017	14.9721	0.112956	33.7368	0.22995	2.43566	0.0160638	1.08053	0.00924645	36.2528	1.73311	0.0493918	0.00266039
207530	32	13.77	0.112238	14.896	0.125321	33.5601	0.257319	2.43747	0.00770998	1.08191	0.00534886	42.4294	2.55398	0.0432616	0.00229771
199023	1	13.8108	0.0429105	14.8594	0.0310249	33.4091	0.0706347	2.41909	0.00508837	1.07594	0.00270465	68.2157	1.15068	0.0308846	0.000743547
199023	2	13.7205	0.0218516	14.8247	0.0249816	33.3119	0.0505424	2.42791	0.00193105	1.08106	0.000755957	57.6034	2.73449	0.0314233	0.00111446
199023	3	13.7759	0.027824	14.8901	0.0228011	33.4922	0.0509617	2.42997	0.00235607	1.08039	0.00103564	69.336	3.61343	0.0309676	0.00119792
199023	4	13.7734	0.0294982	14.8731	0.0284255	33.4526	0.0629866	2.4288	0.00213154	1.07985	0.00104361	61.9298	2.288	0.0357954	0.000960457
199023	5	13.6919	0.044928	14.8019	0.0484644	33.2346	0.0874023	2.42735	0.00502353	1.08108	0.00297336	59.399	1.04286	0.0227058	0.000859217
199023	6	13.7303	0.0231778	14.8376	0.0216852	33.3726	0.0499714	2.43059	0.00225535	1.08065	0.000949641	60.3531	2.37777	0.0338651	0.00161072
199023	7	13.7673	0.0474115	14.8261	0.0388221	33.3587	0.0790864	2.42542	0.00357862	1.07806	0.00177115	47.3868	1.14982	0.0379179	0.000752354
199023	8	13.7622	0.0379257	14.8558	0.0457423	33.4257	0.0953429	2.42882	0.00209073	1.07946	0.00117332	59.1545	3.8173	0.0308456	0.00200113
199023	9	13.7468	0.0257073	14.8538	0.0240428	33.3641	0.055594	2.42705	0.00160545	1.08054	0.00109785	63.8259	3.09733	0.0278619	0.00167217
199023	10	13.7358	0.0253981	14.8571	0.0276234	33.3966	0.0609536	2.43136	0.00161443	1.08164	0.000784976	66.8523	2.22836	0.0321929	0.000706145
199023	11	13.7706	0.0435649	14.8871	0.0452152	33.4445	0.10248	2.42962	0.00176093	1.08108	0.00133896	58.1008	3.09771	0.0329834	0.00123388
199023	12	13.7583	0.07486	14.8571	0.0693656	33.3706	0.179061	2.4255	0.00496363	1.07988	0.0017481	55.3407	2.44953	0.0258191	0.00225379
199023	13	13.778	0.0533599	14.8872	0.0564748	33.4746	0.124245	2.42958	0.00179485	1.08051	0.00100349	65.8302	4.50536	0.0345792	0.00286979
199023	14	13.753	0.0259747	14.8488	0.0262864	33.3687	0.0730925	2.42769	0.00165326	1.07973	0.000907393	61.9466	2.10972	0.0303135	0.00117209
199023	15	13.7525	0.0283614	14.8598	0.0314152	33.4146	0.0664368	2.42972	0.00240486	1.08051	0.0010591	66.9291	6.98411	0.0264627	0.00251401
199023	16	13.7728	0.0391447	14.8888	0.0411245	33.4827	0.0921393	2.43108	0.00195404	1.08104	0.00137235	52.0073	1.8333	0.0358486	0.00160404
199023	17	13.7479	0.025474	14.8478	0.0238245	33.3839	0.0547859	2.42832	0.00282513	1.08001	0.0012959	58.7459	2.13477	0.0333139	0.00195496
199023	18	13.7834	0.0418266	14.8978	0.0426065	33.4651	0.0869975	2.42794	0.00266216	1.08085	0.00150715	76.659	5.31454	0.0246328	0.00136157
199023	19	13.7682	0.0516874	14.878	0.0531919	33.4201	0.114547	2.42737	0.00374523	1.08062	0.0021014	54.172	2.32297	0.0350558	0.00419112
199023	20	13.7701	0.0307847	14.8802	0.0349074	33.4347	0.0732043	2.42807	0.00168458	1.08062	0.00123558	60.2496	4.60673	0.0317404	0.00233475
199023	21	13.7769	0.0367432	14.9083	0.0319532	33.473	0.0745179	2.42991	0.00250837	1.08222	0.00163207	67.3766	3.02123	0.0268518	0.000977624
199023	22	13.7622	0.0292016	14.8772	0.0310756	33.4345	0.0749688	2.42944	0.00185419	1.08102	0.00105407	57.6361	2.3487	0.0340567	0.00176204
199023	23	13.7258	0.0266238	14.8445	0.0289865	33.3687	0.0560773	2.43111	0.00206588	1.08146	0.0011878	60.301	3.09137	0.0324234	0.00107588
199023	24	13.7232	0.0235057	14.8398	0.0236627	33.364	0.0584113	2.43121	0.0014978	1.08137	0.00084649	80.5834	3.03569	0.0270496	0.00108484
199023	25	13.7765	0.036008	14.8794	0.0381735	33.4324	0.0890892	2.42678	0.00250129	1.08006	0.00120566	55.6589	2.82648	0.0345849	0.0015781
199023	26	13.7	0.0192418	14.8	0.0221177	33.267	0.0466194	2.4287	0.00189881	1.08074	0.00114484	57.327	1.5073	0.0285264	0.00171784
199023	27	13.7829	0.0312736	14.886	0.0355087	33.4362	0.0720414	2.42744	0.00214487	1.08004	0.00106252	65.3157	4.61292	0.0330638	0.00233325
199023	28	13.7535	0.030667	14.8708	0.031939	33.4313	0.0665507	2.43031	0.00164837	1.08124	0.00104365	62.6077	2.4356	0.031337	0.00233832
199023	29	13.7548	0.0552632	14.8582	0.0515089	33.3955	0.120262	2.42795	0.00291192	1.08024	0.00154641	54.2599	4.20534	0.0360826	0.00347421
199023	30	13.719	0.0271637	14.8253	0.0308505	33.3297	0.0573613	2.42947	0.00243494	1.0803	0.00109765	58.7307	1.63302	0.0328441	0.00164667
199023	31	13.6859	0.0240679	14.8125	0.0260399	33.2504	0.0500853	2.43083	0.00271485	1.08232	0.00152283	59.0698	1.28921	0.0278784	0.00153196
199023	32	13.7716	0.0428424	14.8648	0.0439436	33.4088	0.0800488	2.42596	0.00424298	1.07939	0.0022676	63.4548	1.63418	0.0275597	0.00133371
199023	33	13.8035	0.0385191	14.8836	0.0527052	33.4583	0.11555	2.42389	0.00354903	1.07824	0.00184046	56.768	3.90462	0.0348128	0.00260342
199023	34	13.7311	0.0256899	14.8298	0.0225263	33.3405	0.043982	2.42714	0.00177014	1.08002	0.00079452	62.6607	1.38721	0.0332623	0.00211557
199023	35	13.7347	0.0256093	14.8334	0.0263041	33.3219	0.055208	2.42613	0.00198252	1.08001	0.00122101	65.1407	2.82288	0.0317698	0.00136998
199023	36	13.7373	0.0336126	14.8568	0.03308	33.371	0.0740664	2.42925	0.00206046	1.0815	0.000925209	72.8358	3.00499	0.0313573	0.00117352
199023	37	13.7682	0.0252212	14.8629	0.0289633	33.4146	0.0537299	2.42695	0.00185717	1.07951	0.000880676	66.7017	4.78371	0.0342106	0.00257606
198212	1	13.8084	0.0752882	14.8984	0.0837427	33.6083	0.182887	2.4339	0.00197576	1.07894	0.00157011	53.0909	2.54817	0.0363654	0.00277015
198212	2	13.676	0.0812437	14.7959	0.0772435	33.3486	0.174164	2.43849	0.00357379	1.0819	0.00270133	47.4994	0.666777	0.0364006	0.00300026
198212	3	13.7951	0.0547754	14.9018	0.0669618	33.5551	0.125571	2.43796	0.00333007	1.08151	0.00163545	40.118	2.75844	0.0533311	0.00363195
198212	4	13.7312	0.0843687	14.8418	0.100969	33.4536	0.216937	2.43632	0.00602679	1.08089	0.00401069	29.2043	1.4163	0.0585239	0.00142193
198212	5	13.7983	0.0664672	14.8906	0.0966992	33.5996	0.132493	2.43506	0.00520494	1.07915	0.00337864	50.3206	0.909298	0.0437613	0.00136206
198212	6	13.7805	0.126018	14.9225	0.135347	33.6145	0.300467	2.4393	0.00177434	1.08288	0.00166771	46.0899	1.43857	0.0487057	0.00131756
198212	7	13.7615	0.115244	14.845	0.133188	33.4816	0.30904	2.43296	0.00582825	1.07873	0.00350019	44.071	1.96695	0.0441985	0.00299981
198212	8	13.6945	0.0553803	14.8019	0.04632	33.356	0.115009	2.43575	0.00247221	1.08088	0.00128816	51.3931	0.326221	0.0324335	0.00124989
198212	9	13.8321	0.0806387	14.9411	0.0827411	33.6555	0.155142	2.43319	0.00669637	1.08019	0.00298085	33.9054	0.814431	0.0474729	0.00234609
198212	10	13.7999	0.0520436	14.9143	0.0530388	33.6349	0.101277	2.43735	0.00385696	1.08076	0.00171271	46.4112	1.82583	0.0355059	0.00170212
198212	11	13.7648	0.0503232	14.8851	0.0637133	33.554	0.130094	2.43769	0.00484957	1.08139	0.00230244	34.4327	1.42004	0.0581862	0.00116291
198212	12	13.8004	0.108959	14.933	0.0814664	33.6329	0.182401	2.43725	0.00869228	1.08214	0.00393748	33.3976	1.69874	0.0441139	0.00362772
198212	13	13.8627	0.0912277	14.8924	0.0944739	33.6621	0.199022	2.42829	0.00636799	1.07429	0.00284011	40.7895	0.944393	0.0456557	0.000900784
198212	14	13.809	0.0896262	14.9501	0.108329	33.6934	0.210041	2.43997	0.0041723	1.08262	0.00199211	56.8885	2.33385	0.0401415	0.00214768
198212	15	13.7413	0.0750089	14.8266	0.0799978	33.4847	0.170232	2.43683	0.00332501	1.07899	0.00198733	46.9733	2.84023	0.0416397	0.00256192
198212	16	13.7191	0.0391766	14.873	0.0423122	33.447	0.0933505	2.438	0.00539724	1.08411	0.00267778	44.6703	0.433395	0.0417959	0.00184764
198212	17	13.8033	0.0898433	14.9153	0.0923456	33.7377	0.181461	2.44425	0.00601943	1.08059	0.00419027	35.3233	0.595173	0.0469017	0.000934999
198212	18	13.7119	0.0703029	14.8364	0.0889671	33.4315	0.205704	2.43812	0.00338758	1.082	0.00173269	56.6054	1.03238	0.0281914	0.001195
198212	19	13.837	0.115634	14.9501	0.123086	33.7277	0.28254	2.43751	0.0033782	1.08045	0.00142024	54.45	1.93997	0.0397067	0.00180952
198212	20	13.7507	0.130011	14.8834	0.143731	33.5478	0.319263	2.43972	0.00344423	1.08237	0.00164197	50.885	2.28943	0.0361675	0.00293
198212	21	13.8284	0.103776	14.9324	0.119108	33.7539	0.271791	2.4409	0.00588783	1.07983	0.00264589	45.7269	1.29155	0.0405158	0.00314582
198212	22	13.7736	0.0371507	14.8969	0.0415404	33.55	0.0904255	2.43583	0.00232156	1.08156	0.00133762	46.8664	2.55438	0.0410029	0.00284816
198212	23	13.7858	0.100608	14.9156	0.109232	33.6209	0.234073	2.43884	0.00692726	1.08197	0.00427394	49.993	3.20945	0.0370425	0.00481774
198212	24	13.8272	0.0969981	14.9	0.0839769	33.6531	0.216866	2.43388	0.00472626	1.07762	0.00284038	50.6636	3.4608	0.0349311	0.00332916
198212	25	13.7285	0.0663377	14.8301	0.0614108	33.547	0.129974	2.44365	0.00467024	1.08026	0.00201306	42.3206	0.647308	0.0407202	0.00145486
198212	26	13.7576	0.060186	14.8862	0.060154	33.5453	0.132215	2.43835	0.00451619	1.08205	0.00240615	34.7046	1.2663	0.0545364	0.000786979
198212	27	13.7665	0.0461132	14.8974	0.0479729	33.5554	0.104939	2.43749	0.00192354	1.08216	0.00114095	72.2356	5.45302	0.0300327	0.00260453
198212	28	13.7264	0.0788753	14.7941	0.107684	33.3738	0.15448	2.43141	0.00717993	1.07777	0.00279857	35.4573	0.601829	0.0387905	0.0018587
198212	29	13.7544	0.0892454	14.8833	0.102619	33.5676	0.187646	2.44057	0.00523194	1.08207	0.0022893	37.6831	2.63357	0.0515164	0.00169118
198212	30	13.7344	0.0365863	14.8328	0.0354802	33.4586	0.0837425	2.43613	0.00356988	1.07999	0.00200608	51.268	1.24336	0.0346647	0.00104326
168963	1	13.6875	0.0560803	14.8523	0.0507983	33.4393	0.116199	2.44534	0.00419325	1.08608	0.00217942	58.5574	1.79913	0.0284645	0.000969411
168963	2	13.6458	0.0649533	14.8207	0.0725579	33.4005	0.158997	2.44771	0.00414068	1.08611	0.00202438	68.9428	1.38202	0.0212707	0.000603561
168963	3	13.614	0.0451104	14.7923	0.0511984	33.2652	0.0962047	2.44355	0.00469419	1.08659	0.00281743	63.6315	1.59459	0.0198381	0.000505708
168963	4	13.6636	0.0653039	14.7956	0.0732391	33.3875	0.162157	2.44358	0.00491688	1.0829	0.00347329	47.1839	1.90159	0.0263751	0.00118209
168963	5	13.6614	0.0703822	14.8256	0.0982305	33.379	0.180282	2.44335	0.00857594	1.08524	0.00548118	52.7706	1.09011	0.0259514	0.000654596
168963	6	13.6155	0.0323504	14.7823	0.0330488	33.2864	0.0560466	2.44582	0.00393948	1.08573	0.00222132	80.3739	1.51697	0.0147821	0.000538962
168963	7	13.6298	0.0503808	14.7691	0.0550599	33.2841	0.118675	2.44206	0.00315899	1.08361	0.00171078	85.6259	2.26727	0.0164865	0.000483759
168963	8	13.6532	0.118072	14.8263	0.125791	33.3815	0.275059	2.44508	0.00343346	1.08595	0.00163073	96.7444	3.05532	0.0140122	0.000503185
168963	9	13.6807	0.102882	14.8403	0.106967	33.4337	0.221989	2.44409	0.00425587	1.08482	0.00203666	76.8584	3.6615	0.0170403	0.000953365
168963	10	13.6672	0.0664587	14.8421	0.0845966	33.415	0.165664	2.445	0.00662027	1.08516	0.00300904	44.23	1.90367	0.0318882	0.00128611
168963	11	13.5914	0.0665596	14.762	0.0781693	33.2352	0.152309	2.44543	0.00515633	1.08615	0.00288274	53.9348	1.18893	0.0240908	0.000656333
168963	12	13.6494	0.117661	14.7939	0.109033	33.3196	0.282594	2.44113	0.00539554	1.08389	0.00342529	82.6499	1.64057	0.0147128	0.000892035
168963	13	13.6048	0.088999	14.7733	0.0928091	33.2629	0.213216	2.44501	0.00359457	1.08552	0.00165209	80.1927	2.19369	0.0157675	0.000419236
168963	14	13.6151	0.0615306	14.7812	0.0643642	33.2816	0.142438	2.44498	0.00196496	1.08567	0.00129506	133.26	3.92622	0.0100608	0.000329381
168963	15	13.6468	0.0881981	14.8231	0.101688	33.3505	0.231438	2.44382	0.00601192	1.08622	0.00343763	47.128	1.57499	0.0274567	0.00148971
168963	16	13.6823	0.104247	14.845	0.101275	33.5017	0.223079	2.44886	0.00660867	1.08513	0.00370683	48.2759	1.85481	0.0322235	0.000993423
168963	17	13.6409	0.0582138	14.8109	0.0886361	33.3469	0.192049	2.44459	0.00743012	1.08576	0.00410175	60.8278	0.871153	0.0228257	0.000589025
168963	18	13.698	0.0694409	14.864	0.0754754	33.455	0.164798	2.4411	0.00409255	1.08518	0.00217847	71.0489	1.60662	0.017359	0.000805754
168963	19	13.6047	0.0782655	14.7807	0.0789146	33.2744	0.155449	2.44909	0.00485337	1.0865	0.00235797	58.3408	0.95536	0.0231744	0.000521428
168963	20	13.6493	0.0824373	14.8516	0.0974185	33.4373	0.168981	2.44636	0.00733054	1.0865	0.00381281	42.0509	0.929119	0.0317306	0.000897768
168963	21	13.6208	0.114204	14.7888	0.124288	33.3066	0.269406	2.44533	0.00440716	1.08578	0.00331033	95.0431	2.07355	0.0158401	0.000379305
168963	22	13.687	0.0805255	14.8649	0.0867725	33.4459	0.191343	2.44271	0.00382267	1.0861	0.0024435	72.5389	3.33901	0.0215383	0.000917919
168963	23	13.6403	0.05332	14.8015	0.0509004	33.3518	0.12936	2.44512	0.00274572	1.08605	0.00182671	103.417	2.95472	0.0133037	0.000425731
168963	24	13.643	0.0910329	14.8022	0.0940606	33.35	0.208534	2.4446	0.00418661	1.08502	0.00214552	69.1267	0.887568	0.0168265	0.000556887
168963	25	13.6495	0.0562813	14.7853	0.0573454	33.3423	0.122549	2.44292	0.00669604	1.08431	0.00304334	53.5436	0.933175	0.0241834	0.000605946
168963	26	13.7257	0.190332	14.8541	0.209327	33.487	0.46718	2.43974	0.00585716	1.08221	0.00303596	78.5337	2.3059	0.0170988	0.00068826
168963	27	13.699	0.0936118	14.8841	0.1222	33.4993	0.247285	2.44537	0.00541957	1.08649	0.00363059	70.2855	0.732199	0.0205981	0.00046449
168963	28	13.6816	0.0673312	14.8474	0.075378	33.4071	0.163051	2.44181	0.00428433	1.08522	0.00186474	63.6391	1.59085	0.0208576	0.000578868
168963	29	13.7249	0.073803	14.875	0.0731348	33.4938	0.147593	2.44062	0.00682985	1.08391	0.00391337	44.7436	1.13192	0.0274038	0.00116018
168963	30	13.7069	0.0806902	14.8591	0.0865532	33.4692	0.190265	2.44187	0.00484379	1.0841	0.00243458	59.1495	2.3636	0.0223664	0.00117466
155514	1	13.8556	0.102531	14.9212	0.121038	33.6988	0.271283	2.43221	0.0122293	1.07697	0.00688831	33.2988	1.07783	0.018144	0.000920702
155514	2	13.8134	0.0586156	14.8859	0.0646929	33.562	0.11545	2.43137	0.00633549	1.07668	0.00371907	38.0909	2.17713	0.0156281	0.000803964
155514	3	13.7568	0.0767451	14.8643	0.0754406	33.4296	0.168415	2.43021	0.00572466	1.07821	0.0033104	34.8264	2.02614	0.0183821	0.00108017
155514	4	13.7938	0.0626188	14.8482	0.0563642	33.4808	0.109065	2.42756	0.00807456	1.07661	0.00459341	37.6645	1.10307	0.0148446	0.000685443
155514	5	13.8236	0.0814147	14.8942	0.094081	33.5632	0.185954	2.42816	0.00705743	1.07749	0.00353197	38.0328	1.25193	0.0157719	0.000807803
155514	6	13.8275	0.117787	14.8876	0.121312	33.5533	0.267985	2.42681	0.00969245	1.07677	0.00456565	30.7274	1.94436	0.0203852	0.00131779
155514	7	13.8147	0.0530627	14.9035	0.0615572	33.616	0.128054	2.43344	0.00565076	1.07886	0.00303276	39.2634	0.829002	0.0150992	0.000677101
155514	8	13.8568	0.126556	14.9289	0.13831	33.9682	0.271171	2.4516	0.0102002	1.07742	0.00485143	43.2498	0.43883	0.0140456	0.00055618
155514	9	13.8651	0.127746	14.936	0.12856	33.7838	0.274196	2.43689	0.00941049	1.07738	0.00556474	33.0538	1.63231	0.0145167	0.00129795
155514	10	13.826	0.159802	14.905	0.151249	33.6468	0.381685	2.43374	0.014247	1.07815	0.00602347	30.1459	0.481161	0.0206825	0.00228292
155514	11	13.8214	0.113567	14.906	0.130154	33.6142	0.275429	2.43216	0.00694872	1.07849	0.00366046	43.7422	1.37746	0.0129419	0.000474528
155514	12	13.7769	0.0602523	14.834	0.0780853	33.4499	0.163353	2.43112	0.00668872	1.07813	0.0037924	38.0352	1.0144	0.0153919	0.000711361
155514	13	13.7682	0.0855662	14.8421	0.0873293	33.5338	0.198454	2.4358	0.00739552	1.07809	0.00332129	32.4555	1.90325	0.0174425	0.00104143
155514	14	13.8256	0.0653884	14.8753	0.0753147	33.5682	0.174981	2.43074	0.00507989	1.0772	0.00350071	42.3611	0.770973	0.0136946	0.000535613
155514	15	13.836	0.126501	14.9173	0.146172	33.7245	0.314511	2.43444	0.00692007	1.07814	0.00305001	41.4156	0.881095	0.0118894	0.000488956
155514	16	13.8158	0.123451	14.8725	0.126558	33.6176	0.272853	2.43364	0.00758079	1.07575	0.00335691	37.6034	2.04807	0.0166861	0.000880689
155514	17	13.8035	0.104627	14.879	0.0842033	33.5469	0.174653	2.43253	0.00696048	1.0796	0.00395607	37.6469	1.92909	0.0167702	0.00117505
155514	18	13.8144	0.0765757	14.8691	0.087412	33.6009	0.177877	2.43091	0.00577264	1.07562	0.00306559	39.3216	1.94849	0.0152245	0.000886736
155514	19	13.8514	0.145153	14.91	0.179576	33.6891	0.347916	2.4323	0.00964274	1.07644	0.00693635	28.6602	0.594688	0.0208017	0.000733398
155514	20	13.8636	0.17953	14.9208	0.184891	33.5738	0.506393	2.43138	0.00694349	1.07678	0.00474573	34.6077	5.92202	0.0192948	0.00181498
155514	21	13.7418	0.171621	14.8125	0.136847	33.8405	0.560016	2.46236	0.0203156	1.0782	0.00797223	39.1774	1.16365	0.0153562	0.000642623
155514	22	13.8387	0.138938	14.9038	0.134752	33.6725	0.2776	2.43376	0.0154866	1.07719	0.00754173	27.2714	0.755543	0.021198	0.00094131
155514	23	13.7327	0.0895622	14.8295	0.0867675	33.4112	0.18859	2.43319	0.0137914	1.07998	0.00667087	34.6554	0.315259	0.0174379	0.00075871
155514	24	13.8635	0.090215	14.9277	0.0953893	33.6569	0.196106	2.43037	0.00421939	1.07845	0.00276471	47.5466	2.34271	0.0131478	0.000727803
155514	25	13.7523	0.0880672	14.8408	0.0905145	33.4499	0.208995	2.43254	0.00826294	1.0793	0.00431263	34.13	0.977539	0.016913	0.000754854
155514	26	13.743	0.117991	14.8331	0.122455	33.4166	0.237913	2.43176	0.00920141	1.07942	0.006086	31.8594	0.344526	0.0184585	0.000814815
155514	27	13.823	0.10091	14.8993	0.122264	33.6087	0.225202	2.43513	0.00664729	1.07784	0.00365176	34.1263	1.82837	0.0193763	0.000917354
155514	28	13.771	0.0794451	14.8356	0.0914315	33.5718	0.17197	2.43308	0.00746236	1.07633	0.00446889	35.5997	1.98775	0.0174925	0.00096201
155514	29	13.8406	0.103857	14.9163	0.119416	33.5852	0.256804	2.42496	0.00645312	1.07775	0.0036278	39.0236	2.23844	0.015825	0.000831705
155514	30	13.8013	0.104933	14.851	0.110655	33.5257	0.234893	2.42934	0.00731593	1.07612	0.00389608	41.2854	1.54372	0.014497	0.000640075
155514	31	13.7752	0.0879577	14.8425	0.0940165	33.462	0.197756	2.42932	0.0055609	1.07755	0.00325855	43.4714	1.26608	0.0135401	0.00059638
155514	32	13.7879	0.215231	14.8765	0.220713	33.6019	0.52176	2.43711	0.00959157	1.07901	0.00458018	60.1054	3.45871	0.009019	0.000814648
155514	33	13.7365	0.0710302	14.8238	0.0652974	33.4622	0.125878	2.43422	0.00861153	1.07933	0.00451067	37.6237	0.967028	0.01495	0.000654123
155502	1	13.6153	0.0847927	14.7879	0.0914217	33.3825	0.205381	2.45184	0.00167075	1.08613	0.000841917	53.5972	1.9422	0.0229991	0.000237013
155502	2	13.6372	0.0553835	14.8074	0.0541462	33.4508	0.11832	2.45291	0.00217295	1.08581	0.00139779	48.5163	0.467665	0.0224355	0.000924992
155502	3	13.7038	0.101949	14.85	0.0948353	33.5629	0.219099	2.44918	0.00518763	1.08365	0.00277227	61.5062	1.08614	0.0219804	0.000935361
155502	4	13.6485	0.0683447	14.822	0.0661645	33.4517	0.152527	2.45095	0.00214493	1.08598	0.00116888	50.7595	0.739964	0.0242011	0.000458423
155502	5	13.586	0.0550145	14.7528	0.0598933	33.2621	0.145163	2.44826	0.00298452	1.08588	0.00150979	50.421	1.84732	0.0246819	0.000372392
155502	6	13.6712	0.0438713	14.8224	0.0558669	33.5	0.105428	2.45041	0.00121794	1.0842	0.000942584	49.966	0.851871	0.022285	0.000825292
155502	7	13.661	0.037625	14.8275	0.0689279	33.4522	0.118136	2.44874	0.00213207	1.08539	0.00418546	47.2412	0.241007	0.0252005	0.00136518
155502	8	13.5574	0.0568375	14.7243	0.051817	33.2249	0.156402	2.45067	0.00395227	1.08607	0.0013978	47.2876	0.473231	0.0248077	0.000343194
155502	9	13.7626	0.0484637	14.9127	0.048611	33.6882	0.115686	2.44781	0.00247303	1.08357	0.00163347	51.3958	0.942672	0.0201731	0.00114948
155502	10	13.7471	0.0760253	14.8734	0.0693244	33.5869	0.129536	2.44323	0.00543874	1.08193	0.00229494	44.2883	0.196285	0.0186962	0.000780482
155502	11	13.6103	0.0573298	14.7482	0.0472084	33.2788	0.125088	2.44513	0.00570011	1.08361	0.00296311	43.1992	0.913753	0.0250413	0.000563193
155502	12	13.727	0.0775353	14.8918	0.0839428	33.5931	0.171412	2.44726	0.0030876	1.08486	0.00143205	47.5053	2.05074	0.0230496	0.00167224
155502	13	13.6105	0.0746712	14.7808	0.0716004	33.3377	0.16899	2.44941	0.00207552	1.08599	0.0015339	47.5529	0.593038	0.024398	0.00104866
155502	14	13.6709	0.0934966	14.8209	0.103334	33.4631	0.235664	2.44777	0.00432187	1.08412	0.00145434	48.4353	2.07354	0.0197511	0.000221317
155502	15	13.7439	0.0593673	14.9165	0.0622554	33.6464	0.133686	2.44811	0.0020515	1.08532	0.00100412	53.0858	2.03414	0.020028	0.00155
155502	16	13.7183	0.0755006	14.8614	0.0822754	33.5214	0.183852	2.44355	0.0015214	1.08332	0.000838656	44.9051	1.72993	0.0211119	0.00059515
155502	17	13.651	0.104814	14.798	0.0923973	33.3822	0.232368	2.44543	0.00337702	1.08404	0.00200794	40.4469	1.11209	0.0239467	0.0017463
155502	18	13.7015	0.0234035	14.8585	0.022967	33.513	0.052434	2.44594	0.00115894	1.08444	0.000641306	65.5193	1.90722	0.0183589	0.000632426
155502	19	13.6653	0.0611232	14.7719	0.0483461	33.3448	0.0940567	2.44012	0.00439753	1.08098	0.0016209	42.0841	1.63731	0.0240909	0.000562406
155502	20	13.7483	0.0425326	14.8773	0.0541286	33.6008	0.120788	2.44399	0.00207229	1.08212	0.00256301	43.846	1.9728	0.0222386	0.0014584
155502	21	13.7801	0.107091	14.9092	0.124929	33.6453	0.293039	2.44156	0.00479171	1.08193	0.00201016	39.7261	5.02024	0.0248142	0.00427838
155502	22	13.6757	0.0649742	14.8028	0.0575363	33.4325	0.137225	2.44466	0.00199473	1.08242	0.00243907	42.0849	0.787089	0.0228523	0.0016302
155502	23	13.5774	0.0463444	14.7289	0.0437102	33.2226	0.113961	2.44692	0.00383313	1.08482	0.00153952	41.5704	0.981204	0.0246527	0.000388438
155502	24	13.6579	0.0386036	14.8236	0.0802377	33.4314	0.118757	2.44777	0.00400772	1.08535	0.00428431	44.957	0.553587	0.0201939	0.000606573
185986	1	13.9451	0.120624	15.1116	0.174096	33.993	0.356373	2.4376	0.00644359	1.08363	0.00338715	39.401	0.809622	0.0570144	0.00410879
185986	2	13.8707	0.101276	15.0449	0.103892	33.8233	0.276286	2.43845	0.00551045	1.08466	0.0026859	37.8264	0.45931	0.0628854	0.00274109
185986	3	13.9025	0.111074	15.0685	0.0973298	33.8662	0.187917	2.43602	0.00695114	1.08389	0.00599727	42.3463	0.175997	0.0556906	0.00264091
185986	4	14.0179	0.0574094	15.1832	0.0687368	34.0896	0.154893	2.43185	0.00311637	1.08313	0.00358563	40.1219	0.208057	0.0517273	0.00308732
185986	5	13.9292	0.15431	15.1091	0.176705	33.9161	0.393025	2.43489	0.00517165	1.0847	0.00204506	43.8154	0.806322	0.0494852	0.00134705
185986	6	13.8799	0.15355	15.04	0.159015	33.809	0.388789	2.43582	0.00674425	1.08358	0.0038241	39.4716	1.44858	0.0578366	0.00156135
185986	7	13.9722	0.131117	15.1844	0.125583	34.0711	0.202367	2.43857	0.00992009	1.08677	0.00316591	35.4184	0.877614	0.0696582	0.00358395
185986	8	13.8281	0.303917	15.014	0.271456	33.8021	0.431901	2.44457	0.0224938	1.08578	0.00423289	36.4706	0.815151	0.0667205	0.000907415
185986	9	13.9298	0.091273	15.1122	0.0918083	33.9192	0.214189	2.43502	0.00399616	1.08489	0.00278491	34.5404	0.815881	0.0582146	0.00206168
185986	10	13.861	0.109821	15.0485	0.0977544	33.8394	0.300365	2.44135	0.0109599	1.08569	0.00189943	25.8735	0.689666	0.0825464	0.00414597
185986	11	13.9202	0.0248317	15.1091	0.0268774	33.8781	0.0185875	2.43375	0.00546228	1.08541	0.000910771	36.8399	0.778457	0.0582601	0.00289161
185986	12	13.9776	0.0866456	15.1733	0.0813993	34.037	0.20565	2.43515	0.0138469	1.08556	0.00486094	29.5371	0.601963	0.0717039	0.00343539
185986	13	14.0394	0.0591343	15.1605	0.0548713	34.1691	0.126616	2.43381	0.00350067	1.07986	0.00143665	41.1415	1.11667	0.0539614	0.00454797
185986	14	13.8572	0.0779187	15.0555	0.0695594	33.8471	0.152529	2.44259	0.00482	1.08649	0.0033806	41.3497	0.313382	0.0537451	0.0036069
185986	15	13.8865	0.0762489	15.0663	0.0960624	33.8824	0.18662	2.43997	0.00339749	1.08496	0.00355965	41.2618	1.01554	0.049448	0.00409168
185986	16	13.9743	0.0604727	15.1469	0.0529174	34.0223	0.142129	2.43464	0.00601758	1.08391	0.00315701	42.8011	0.838903	0.0491899	0.0038745
185986	17	13.9109	0.211294	15.0756	0.241008	33.9086	0.496997	2.43757	0.00549076	1.08372	0.00229646	39.2189	0.678927	0.0477142	0.00262372
185986	18	13.8588	0.0999376	15.0307	0.12656	33.7408	0.279796	2.43458	0.00573364	1.08455	0.00284879	38.2866	0.94501	0.0519783	0.00169599
185986	19	13.9821	0.149035	15.1311	0.165163	34.0999	0.35421	2.43884	0.00674756	1.08218	0.00214905	48.406	1.05713	0.046334	0.00212407
185986	20	14.0277	0.0612311	15.1919	0.0690738	34.1087	0.160733	2.43151	0.00342329	1.083	0.00315525	37.3985	3.4423	0.0520432	0.00683549
185986	21	13.9244	0.129031	15.1087	0.143335	33.8779	0.279784	2.43302	0.00409754	1.08505	0.00217707	40.9719	1.18626	0.051173	0.00243695
185986	22	13.843	0.0731319	15.0155	0.0788176	33.7704	0.185172	2.43952	0.00225882	1.0847	0.00151443	45.882	0.718328	0.0473578	0.00276882
185986	23	13.8756	0.0716083	15.0481	0.124349	33.7705	0.231724	2.43378	0.00588973	1.08448	0.00428507	29.258	0.649852	0.0668139	0.00530078
185986	24	14.0398	0.141455	15.1608	0.128582	34.0186	0.274465	2.42306	0.00570718	1.07986	0.00335604	36.0929	1.07964	0.0579542	0.00379146
185986	25	13.8408	0.0421178	15.0107	0.140694	33.7383	0.197389	2.43759	0.0102027	1.08451	0.00690717	29.4538	0.490179	0.0716135	0.00300848
185986	26	13.9227	0.126462	15.034	0.107383	33.8444	0.194406	2.43095	0.0135063	1.07984	0.00468202	33.5826	0.665606	0.0567507	0.00369766
185986	27	13.8524	0.0657084	15.0141	0.102235	33.7583	0.168772	2.437	0.00301432	1.08385	0.00347593	34.5225	0.509941	0.0555213	0.00151462
185986	28	13.8716	0.0671954	15.0235	0.0892656	33.7287	0.141275	2.43152	0.00505471	1.08305	0.00495516	37.0277	0.28768	0.0516301	0.00237333
185986	29	13.923	0.0626545	15.1028	0.053767	33.9275	0.156217	2.43681	0.00522917	1.08475	0.00272832	40.855	0.723642	0.047979	0.0034982
185986	30	14.0583	0.1798	15.2328	0.137904	34.2628	0.37828	2.43725	0.0058184	1.08361	0.00670472	37.5274	2.36805	0.048922	0.00642379
185986	31	14.0664	0.0325907	15.2431	0.0375608	34.2644	0.0702434	2.43591	0.00153641	1.08366	0.00168877	40.2622	1.8334	0.0522854	0.00304308
178052	1	13.7505	0.0385092	14.9533	0.0377971	33.7405	0.0860714	2.4538	0.00260258	1.08749	0.00139007	91.9793	1.4852	0.00569744	0.000252218
178052	2	13.6165	0.17917	14.8205	0.184424	33.5389	0.330575	2.46334	0.0171535	1.08849	0.00891143	54.4408	0.246113	0.00873814	0.00087523
178052	3	13.7668	0.0522651	14.9831	0.0638588	33.7962	0.13318	2.4549	0.00274285	1.08834	0.00173221	105.027	2.33838	0.00519943	0.000235732
178052	4	13.7364	0.125649	14.9894	0.175256	33.7621	0.356527	2.45789	0.0143631	1.09121	0.00740045	40.3655	0.672301	0.0110679	0.000665177
178052	5	13.6561	0.11153	14.8274	0.13413	33.4898	0.255032	2.45245	0.00910379	1.0858	0.00647169	39.8381	0.676758	0.0129681	0.000798368
178052	6	13.7469	0.0497931	14.9597	0.0580925	33.7371	0.117298	2.45422	0.0039937	1.08824	0.00216012	68.6367	0.677197	0.00771512	0.000274678
178052	7	13.7438	0.086637	14.9642	0.0822575	33.7858	0.18969	2.45843	0.00702541	1.08889	0.0038828	52.1448	1.63905	0.00988985	0.000489139
178052	8	13.6509	0.10139	14.8861	0.116755	33.5912	0.265368	2.46073	0.00649422	1.09049	0.00348802	56.2031	0.777148	0.00898459	0.000470235
178052	9	13.7461	0.0881286	14.9939	0.0852167	33.8245	0.181919	2.46077	0.00578104	1.09082	0.00293336	77.6548	0.796877	0.00641634	0.000232415
178052	10	13.6256	0.169642	14.8741	0.172773	33.5291	0.399744	2.46083	0.00707926	1.09171	0.0050113	49.2082	1.09218	0.00944898	0.000517946
178052	11	13.7531	0.148299	14.9533	0.133173	33.7762	0.327667	2.45605	0.0104356	1.08737	0.00561901	44.1118	0.948432	0.0113503	0.000592823
178052	12	13.7671	0.0376674	14.9614	0.0410696	33.7839	0.0861185	2.45399	0.00315597	1.08676	0.00159643	81.9035	2.23977	0.00640846	0.000292026
178052	13	13.6235	0.082162	14.8	0.0869896	33.5398	0.190132	2.462	0.00951108	1.08641	0.00522559	44.4405	0.186072	0.0111677	0.000501824
178052	14	13.7452	0.056801	14.9698	0.0554648	33.7653	0.119606	2.45658	0.00550431	1.08913	0.00287273	65.3284	0.599119	0.00877112	0.000318364
178052	15	13.6511	0.0718399	14.8571	0.0916714	33.5414	0.123226	2.4572	0.0139574	1.08844	0.00958186	44.1074	0.433287	0.0111297	0.000831118
178052	16	13.7655	0.0594175	14.995	0.050184	33.7945	0.109749	2.45513	0.00864697	1.08936	0.00352494	57.6762	0.256114	0.00836894	0.000559539
168903	1	13.7239	0.170135	14.905	0.16795	33.6396	0.407705	2.45147	0.0181753	1.08626	0.00882613	38.6238	0.91416	0.044912	0.00177422
168903	2	13.7115	0.190647	14.8124	0.140255	33.4135	0.363711	2.43724	0.0176839	1.08051	0.009948	39.0695	0.774901	0.0314433	0.00108422
168903	3	13.779	0.176299	14.8848	0.19813	33.5885	0.435764	2.43804	0.0186192	1.08046	0.0097114	36.8806	1.46119	0.0461708	0.00177834
168903	4	13.6896	0.147914	14.8226	0.16437	33.435	0.343009	2.44275	0.019347	1.08294	0.0096592	38.2571	1.23638	0.038651	0.00232363
168903	5	13.7668	0.228516	14.8433	0.210908	33.5291	0.457591	2.44296	0.0094501	1.082	0.004844	48.3119	0.953518	0.0325042	0.000851658
168903	6	13.7668	0.184354	15.0078	0.189988	33.7551	0.413792	2.45218	0.0121231	1.09023	0.0050386	54.0554	1.3619	0.0261916	0.00132414
168903	7	13.7922	0.111908	14.9353	0.146321	33.7291	0.355134	2.4455	0.0158065	1.08289	0.0072043	42.7376	0.964454	0.0259993	0.00181811
168903	8	13.669	0.0990239	14.8534	0.112499	33.5198	0.253763	2.45249	0.0109761	1.0855	0.0052592	34.532	1.57849	0.0453806	0.00234797
168903	9	13.6295	0.116741	14.8279	0.115039	33.4279	0.281206	2.45255	0.00953492	1.08798	0.00502676	36.7411	1.55323	0.0434333	0.00193423
168903	10	13.6783	0.0926036	14.8656	0.0979561	33.5746	0.178908	2.45515	0.007169	1.087	0.00546581	32.4877	1.00874	0.0467831	0.00202264
168903	11	13.691	0.26407	14.8258	0.261806	33.5765	0.61369	2.45318	0.0305904	1.08337	0.0166088	28.2817	1.05841	0.0538637	0.00273572
168903	12	13.6299	0.280273	14.9002	0.334732	33.4403	0.586362	2.45404	0.0183564	1.09316	0.008699	27.8429	0.83174	0.0572531	0.00132248
168903	13	13.6877	0.113127	14.8842	0.10679	33.6219	0.220452	2.45703	0.0106642	1.08648	0.00417656	41.7927	2.05441	0.0397886	0.00268155
168903	14	13.7928	0.15596	14.9754	0.142217	33.8679	0.325227	2.45577	0.0107728	1.08589	0.00573072	67.23	1.59145	0.0212911	0.00122009
168903	15	13.7055	0.085318	14.9161	0.0889358	33.6353	0.182492	2.45449	0.00879332	1.08842	0.00340789	37.9336	1.64989	0.0387515	0.00209543
168903	16	13.7401	0.207627	14.9065	0.22565	33.7279	0.47781	2.45521	0.0291004	1.08505	0.0124019	25.7613	0.425593	0.0502177	0.00163959
168903	17	13.6708	0.0820117	14.8556	0.0795434	33.493	0.163962	2.45323	0.0120657	1.08692	0.00592154	33.3475	1.13734	0.0458225	0.00183368
168903	18	13.638	0.189992	14.8352	0.198008	33.3608	0.447695	2.44634	0.0183566	1.08792	0.0113735	46.6936	1.07854	0.0270571	0.00122224
155513	1	13.79	0.117389	14.9217	0.109612	33.5778	0.181629	2.4352	0.0123249	1.08214	0.00552614	22.5949	0.5797	0.070611	0.00521578
155513	2	13.8342	0.0345654	14.9622	0.0314676	33.6767	0.0689217	2.43434	0.00451419	1.08155	0.00190445	80.8922	2.16514	0.0216577	0.00104326
155513	3	13.8112	0.133682	14.9112	0.141356	33.58	0.328687	2.43137	0.004604	1.07966	0.00305106	59.8297	1.92442	0.0241368	0.000936273
155513	4	13.8095	0.174568	14.8917	0.107928	33.5489	0.270733	2.42959	0.0185049	1.07846	0.00929126	29.1158	0.17182	0.0568535	0.00177882
155513	5	13.7648	0.0371807	14.901	0.0381036	33.5179	0.0745129	2.43506	0.00243806	1.08255	0.0012898	103.932	2.09201	0.0168529	0.000805686
155513	6	13.8527	0.0376597	15	0.0471193	33.7473	0.0799218	2.43618	0.00590066	1.08283	0.00289901	52.1625	2.94298	0.0317648	0.0033596
155513	7	13.7994	0.112328	14.9498	0.160313	33.6988	0.338327	2.44201	0.00967132	1.08335	0.00637035	41.1937	1.10168	0.0429083	0.00181417
155513	8	13.865	0.129084	14.9094	0.151614	33.6607	0.259253	2.42779	0.0104456	1.07534	0.00699043	43.7706	0.532198	0.0374976	0.00127476
155513	9	13.8767	0.0734746	14.8956	0.0645628	33.5607	0.164362	2.41851	0.0100967	1.07343	0.00465132	55.737	1.41275	0.0277001	0.00101512
155513	10	13.8175	0.0495201	14.9531	0.0567509	33.6682	0.122633	2.43663	0.00206779	1.08218	0.00133747	91.9081	3.80872	0.0232157	0.00137087
155513	11	13.8159	0.0968475	14.9463	0.0688199	33.6631	0.0979537	2.43669	0.0156475	1.08185	0.00410449	38.919	0.584134	0.0348181	0.00272417
155513	12	13.8417	0.0453396	14.9256	0.0571992	33.6335	0.105024	2.42988	0.00366256	1.07831	0.00223045	89.1011	1.35452	0.0189515	0.000760914
168966	1	13.7028	0.114515	14.8377	0.149736	33.4258	0.310535	2.43151	0.0123361	1.07938	0.00763061	30.7256	0.676816	0.0457294	0.000938685
168966	2	13.7549	0.0863636	14.9102	0.0810481	33.565	0.170503	2.44056	0.0072416	1.08414	0.00367162	35.9361	1.21019	0.0386942	0.00117862
168966	3	13.6239	0.0696105	14.828	0.0804018	33.4242	0.178911	2.45328	0.00660856	1.08822	0.00308767	42.7627	1.15244	0.0311264	0.0008635
168966	4	13.6758	0.0861298	14.85	0.0960928	33.4632	0.203499	2.44705	0.00690122	1.08594	0.00405306	39.656	1.35586	0.0342412	0.00134482
168966	5	13.7433	0.0754835	14.8507	0.0964502	33.4752	0.156058	2.43605	0.00827351	1.07904	0.00469114	30.1982	0.88918	0.0435473	0.00137347
168966	6	13.7325	0.194367	14.8077	0.185131	33.4393	0.414389	2.43611	0.0294116	1.07894	0.0161353	19.2479	0.595345	0.0615043	0.00286239
168966	7	13.6345	0.130987	14.8184	0.168579	33.3939	0.332551	2.4493	0.011553	1.0868	0.00555226	40.2869	1.07376	0.0312068	0.00135921
168966	8	13.6814	0.128169	14.8711	0.136077	33.4818	0.289262	2.44761	0.00797977	1.08709	0.0041032	38.4882	1.09988	0.032637	0.00119802
168966	9	13.6837	0.163597	14.7768	0.140982	33.4107	0.311727	2.44208	0.0139511	1.0801	0.00740461	31.8592	0.334212	0.0364279	0.00170817
168966	10	13.6378	0.0678301	14.8176	0.0658422	33.3656	0.149246	2.44724	0.00721403	1.08675	0.00430549	39.9648	0.743559	0.0302324	0.00100361
168966	11	13.653	0.0818351	14.875	0.113838	33.3954	0.203902	2.44628	0.00734032	1.08788	0.00470966	40.3561	1.46272	0.0332354	0.00189794
168966	12	13.6619	0.0570777	14.8059	0.060648	33.3813	0.11367	2.44358	0.00689737	1.0841	0.00327268	33.5163	0.378841	0.0399527	0.000886155
168966	13	13.7203	0.162044	14.8421	0.180667	33.4713	0.424887	2.43959	0.0136961	1.08186	0.0076083	30.9414	0.682237	0.041915	0.00144886
168966	14	13.7264	0.178286	14.858	0.19328	33.4976	0.424688	2.44054	0.0153509	1.08254	0.00878087	51.5652	0.967016	0.0259696	0.000909394
168966	15	13.7593	0.0816774	14.9078	0.0821586	33.5332	0.160566	2.43747	0.00791711	1.0836	0.00410457	38.0805	2.11126	0.0366589	0.00277187
168966	16	13.6698	0.0979325	14.8675	0.0994862	33.4802	0.238232	2.4493	0.00587851	1.08773	0.00345877	40.35	1.63968	0.034435	0.00161855
168966	17	13.6383	0.0761589	14.8717	0.0775325	33.4429	0.142603	2.4525	0.00834002	1.09058	0.00464078	36.181	0.424624	0.0355084	0.000675496
168966	18	13.7137	0.153503	14.7752	0.191315	33.3687	0.305055	2.43365	0.0102892	1.07754	0.00993926	27.3276	0.94068	0.0456081	0.00176164
168966	19	13.7425	0.0817817	14.8668	0.0687509	33.4919	0.146333	2.43751	0.00812909	1.08202	0.00462393	38.3198	0.480793	0.0325385	0.000714262
168966	20	13.6763	0.0702649	14.839	0.0743718	33.3962	0.149	2.44212	0.00706421	1.08515	0.00466213	38.176	0.98999	0.032235	0.00120384
168966	21	13.7355	0.142367	14.9045	0.161768	33.5287	0.330374	2.44132	0.0138691	1.08517	0.00596646	34.5275	1.11894	0.0489337	0.00169199
168966	22	13.6017	0.145237	14.7845	0.140271	33.2607	0.213613	2.44569	0.0232005	1.08715	0.0144383	35.7054	0.182575	0.0374586	0.00203372
185992	1	13.6268	0.0789887	14.7935	0.138399	33.1995	0.28705	2.43631	0.0103183	1.0856	0.00460827	24.6002	0.461833	0.074803	0.00222553
185992	2	13.6139	0.0615513	14.861	0.0758291	33.4169	0.191663	2.45458	0.00427334	1.09161	0.00323987	43.8118	1.37107	0.0455409	0.00261035
185992	3	13.609	0.0520604	14.8157	0.0538186	33.3655	0.0918194	2.4503	0.00427388	1.0887	0.00244032	38.1456	1.92933	0.0459484	0.0040386
185992	4	13.5916	0.0397273	14.8092	0.0395505	33.3172	0.0746782	2.45135	0.00349384	1.0896	0.00180466	44.3905	1.56427	0.03743	0.00244877
185992	5	13.6306	0.0542215	14.8818	0.0607164	33.4598	0.128749	2.45481	0.00511161	1.09181	0.00234485	40.6173	2.15696	0.0466073	0.00460792
185992	6	13.649	0.061165	14.8648	0.0620362	33.4493	0.118952	2.45077	0.00471986	1.0891	0.00191408	43.3414	1.5997	0.0407044	0.00319523
185992	7	13.6126	0.0432004	14.8316	0.0455084	33.3809	0.0942038	2.45224	0.00324223	1.08956	0.00185367	52.9557	2.57207	0.0403296	0.00321449
185992	8	13.5961	0.0538808	14.8184	0.0631305	33.3741	0.114335	2.45472	0.00589529	1.08993	0.00485927	40.6227	0.567745	0.0542844	0.00247784
185992	9	13.5889	0.130605	14.8071	0.119279	33.2393	0.29716	2.44611	0.0105903	1.08969	0.00579913	38.5935	0.308474	0.048176	0.000856462
185992	10	13.5698	0.0768619	14.7854	0.0608181	33.2323	0.131737	2.44925	0.0100022	1.08969	0.0045105	27.9497	0.911672	0.0623764	0.00473118
185992	11	13.6206	0.0560395	14.781	0.0631503	33.2853	0.138317	2.44379	0.00519761	1.08523	0.00356041	35.739	1.84992	0.043687	0.00384197
185992	12	13.5721	0.0910971	14.7739	0.0633862	33.233	0.171623	2.44866	0.00473773	1.08859	0.00520756	46.2627	2.14897	0.0377074	0.00171191
185992	13	13.5521	0.0599121	14.8014	0.0903685	33.3897	0.173986	2.46382	0.00909682	1.09218	0.00451872	30.6024	0.595316	0.0622554	0.00341679
185992	14	13.5917	0.0718832	14.7788	0.0665602	33.2752	0.109171	2.4483	0.0120825	1.08736	0.00438136	30.7744	0.700954	0.0677857	0.00241842
185992	15	13.5433	0.0540401	14.7829	0.0623297	33.2905	0.117191	2.45815	0.00498345	1.09155	0.00315898	38.8943	2.01796	0.0514269	0.00344195
185992	16	13.5527	0.0437621	14.7509	0.0496178	33.186	0.0992102	2.44869	0.00341598	1.08842	0.00195114	53.9485	2.2619	0.0306042	0.00229255
185992	17	13.5575	0.0405182	14.7725	0.0593839	33.2708	0.137914	2.45408	0.00859616	1.08963	0.00394168	34.2168	0.475052	0.0600645	0.00189359
185992	18	13.5752	0.0728252	14.7963	0.0859849	33.2951	0.153952	2.45268	0.00426329	1.08995	0.00280857	41.3672	0.864665	0.044295	0.00255014
185992	19	13.6484	0.0847783	14.8031	0.0917706	33.3668	0.184273	2.44479	0.00569554	1.08462	0.00315096	41.801	2.59429	0.0484709	0.00549459
185992	20	13.5804	0.0436486	14.7891	0.0452373	33.303	0.0932655	2.45088	0.00390433	1.08903	0.00258374	46.9147	2.01433	0.0436865	0.0030489
185992	21	13.5877	0.0497691	14.8205	0.050737	33.3438	0.113866	2.454	0.00392573	1.09075	0.00238578	45.1246	1.68935	0.0435565	0.00347113
199700	1	13.578	0.0677113	14.7707	0.0729976	33.427	0.166205	2.46204	0.00189849	1.08794	0.00107237	71.3711	3.8781	0.0214687	0.000919818
199700	2	13.5597	0.0430046	14.7561	0.0488433	33.4234	0.117592	2.46299	0.0028436	1.08832	0.00147459	42.9745	1.09582	0.0343641	0.00109962
199700	3	13.6374	0.0548824	14.8009	0.0641815	33.5453	0.131684	2.45988	0.00517627	1.08535	0.00314874	28.6612	1.28922	0.047629	0.00220916
199700	4	13.6366	0.0754016	14.7177	0.0485421	33.4912	0.118671	2.45607	0.00751027	1.07934	0.00522495	30.1458	0.589175	0.0427107	0.00112002
199700	5	13.6409	0.221823	14.8207	0.254215	33.4621	0.550033	2.45314	0.0129002	1.08648	0.00427507	24.2782	0.474738	0.0564037	0.00339173
199700	6	13.6141	0.0544803	14.7562	0.056824	33.4771	0.135541	2.45903	0.00456289	1.0839	0.002182	35.0206	0.736963	0.0411213	0.00121546
199700	7	13.6161	0.183736	14.7642	0.201564	33.5579	0.289421	2.4648	0.0153101	1.08436	0.00831893	27.4711	0.676202	0.0542248	0.00362669
199700	8	13.5128	0.0327384	14.7254	0.0480168	33.3205	0.0958391	2.46419	0.00261008	1.08921	0.00146415	42.8828	0.765316	0.033757	0.000620856
199700	9	13.6113	0.0452748	14.8041	0.0502158	33.5238	0.104736	2.463	0.00371644	1.08765	0.0018759	36.2281	1.52202	0.0432504	0.00222633
199700	10	13.5705	0.040503	14.7256	0.0408822	33.3887	0.0906666	2.46044	0.00304476	1.08514	0.00151566	49.9761	1.04181	0.0301642	0.00084865
199700	11	13.6407	0.0618755	14.8201	0.0699563	33.5762	0.157669	2.46147	0.00342765	1.08646	0.00184543	39.2981	2.79237	0.0417373	0.00269255
199700	12	13.6191	0.0508697	14.8218	0.0593451	33.5541	0.139616	2.46377	0.00490531	1.08834	0.00247528	26.7036	1.43573	0.0550674	0.00284966
199700	13	13.6112	0.0701723	14.7701	0.0765418	33.5212	0.177255	2.46277	0.00252921	1.08552	0.00146282	49.1652	1.92827	0.0309789	0.00128842
199700	14	13.735	0.0870504	14.8849	0.110762	33.6952	0.211605	2.45327	0.00816092	1.08373	0.00506334	22.3363	0.479764	0.0796804	0.00316771
199700	15	13.6565	0.0494958	14.8038	0.0557521	33.5864	0.115257	2.45941	0.0029553	1.08402	0.00170096	38.4099	2.18479	0.0414425	0.00283013
199700	16	13.5616	0.0444784	14.7454	0.049288	33.3648	0.108138	2.46026	0.00191342	1.0873	0.00122645	63.611	2.85192	0.0231043	0.00127965
199700	17	13.6193	0.0458423	14.8073	0.052478	33.5026	0.112862	2.46002	0.00560488	1.08727	0.0029996	22.8062	0.286819	0.0628788	0.00145842
199700	18	13.6004	0.039414	14.7993	0.0490844	33.4816	0.0878365	2.46187	0.00420352	1.08817	0.00263482	25.7861	0.328837	0.0591063	0.00102625
199700	19	13.6266	0.121511	14.7429	0.123761	33.4959	0.257893	2.45822	0.00644003	1.08196	0.00420893	31.8642	0.6219	0.0467051	0.00156075
199700	20	13.6309	0.0388256	14.8214	0.045693	33.5293	0.0918543	2.4591	0.00269639	1.08686	0.00151999	34.5915	1.48029	0.0468902	0.00222252
199700	21	13.6726	0.0983133	14.8271	0.0879914	33.5905	0.227031	2.45682	0.00495359	1.08449	0.00392652	32.6247	0.297021	0.0415162	0.000877114
199700	22	13.7312	0.0603577	14.8958	0.0622614	33.6338	0.142425	2.44949	0.00382646	1.08484	0.00180234	32.0689	2.0393	0.0423007	0.0024758
199700	23	13.6998	0.0593732	14.8597	0.0609772	33.552	0.136738	2.44916	0.0034516	1.0847	0.00181252	44.9656	1.40731	0.0292883	0.00106899
199700	24	13.7203	0.0429542	14.842	0.0431862	33.5768	0.0970125	2.44728	0.00248461	1.08179	0.00218716	45.2181	2.75252	0.0311651	0.00174688
199700	25	13.6204	0.120638	14.7883	0.138862	33.4112	0.30176	2.45303	0.00493191	1.08575	0.00301687	57.0987	1.17115	0.0212045	0.000463302
199700	26	13.6568	0.053823	14.8307	0.0573858	33.4712	0.128366	2.45094	0.00223504	1.08608	0.0012972	57.1577	2.7333	0.022074	0.00116796
199700	27	13.7228	0.0411237	14.8458	0.0398597	33.6117	0.0911616	2.44937	0.00267436	1.08186	0.00165211	38.7728	0.985863	0.0369086	0.00153923
207505	1	13.6698	0.26822	14.9228	0.216701	33.3311	0.452142	2.43925	0.0435508	1.09193	0.0137991	22.7762	0.173259	0.0490196	0.00297927
207505	2	13.6188	0.211426	14.9431	0.228926	33.4851	0.3285	2.45923	0.0220339	1.09739	0.0132453	26.4183	0.3274	0.0329407	0.00325936
207505	3	13.8196	0.198589	15.0153	0.16704	33.7031	0.272696	2.43943	0.0269559	1.08678	0.0134067	25.8354	0.601011	0.0557896	0.00297675
207505	4	13.7489	0.180056	14.8707	0.196576	33.3798	0.258033	2.42863	0.0258839	1.08195	0.0164309	23.101	0.14066	0.0487286	0.00169436
207505	5	13.724	0.18175	14.958	0.174185	33.4301	0.274508	2.43666	0.0204752	1.09009	0.00759618	26.5957	0.467405	0.0522526	0.00156623
207505	6	13.7714	0.118314	15.0182	0.121621	33.7629	0.204278	2.4523	0.0206702	1.09092	0.0128293	20.9874	0.345571	0.053634	0.00170569
207505	7	13.7936	0.215551	14.912	0.162542	33.5106	0.529096	2.42952	0.0158038	1.0813	0.00972181	27.4118	0.538025	0.0502764	0.00276719
207505	8	13.9101	0.246151	14.9719	0.215126	33.8047	0.410365	2.43162	0.0303089	1.07692	0.0151073	25.5993	0.314684	0.0590939	0.00188141
207505	9	13.7291	0.285468	14.8687	0.216917	33.3248	0.373026	2.4288	0.037284	1.08394	0.0250414	24.9672	0.532766	0.0414624	0.0025286
207505	10	13.6943	0.12155	14.9594	0.113952	33.5371	0.242953	2.44975	0.01864	1.09271	0.0085407	23.7102	0.179437	0.0484302	0.00887512
207505	11	13.8834	0.174941	14.9919	0.153464	33.5011	0.344049	2.41395	0.0278727	1.08034	0.0142525	23.5712	0.389531	0.0506625	0.00217191
207505	12	13.711	0.144055	14.8686	0.135508	33.4014	0.21631	2.43768	0.0222043	1.08509	0.0116336	17.3837	0.307061	0.0637781	0.00181647
207505	13	13.6395	0.219056	14.8468	0.176372	33.3155	0.363764	2.44369	0.0295689	1.0891	0.0162345	28.4592	0.317113	0.03231	0.00178647
207505	14	13.8243	0.12798	14.9689	0.16011	33.5912	0.352598	2.43042	0.0322485	1.08293	0.0113819	24.658	0.243278	0.0440899	0.00158066
207505	15	13.796	0.261785	14.9624	0.251475	33.6393	0.416349	2.43939	0.027965	1.08501	0.0175069	28.0356	1.23467	0.0340988	0.00189877
207505	16	13.7754	0.109298	14.9078	0.11493	33.5248	0.216787	2.43403	0.014455	1.08237	0.00807285	27.423	0.598592	0.0347283	0.00107991
207505	17	13.6526	0.190675	14.8796	0.182948	33.3842	0.338173	2.44589	0.0193811	1.09023	0.0139141	26.5772	0.66557	0.0295558	0.00137561
207505	18	13.8122	0.223794	14.9166	0.236737	33.5825	0.428076	2.43198	0.0226333	1.08025	0.0149729	33.2511	0.354685	0.0330664	0.00177382
207505	19	13.7763	0.277217	15.0117	0.400303	33.5753	0.626716	2.43771	0.0333654	1.08979	0.0220395	22.2397	1.18982	0.0503451	0.00650965
207505	20	13.7544	0.253909	14.8745	0.263247	33.4412	0.563877	2.43171	0.023	1.08149	0.00532191	31.255	0.758848	0.0397619	0.00235751
207505	21	13.789	0.225731	14.9149	0.150852	33.4897	0.387089	2.42945	0.0221238	1.08239	0.0195895	24.9198	0.607289	0.0410815	0.00411765
207505	22	13.7028	0.236525	14.8067	0.219771	33.3433	0.484407	2.43386	0.0158361	1.08087	0.00981678	37.0228	1.30004	0.0352197	0.00269913
207505	23	13.6921	0.126965	14.7869	0.138663	33.2434	0.248632	2.42887	0.0208146	1.08037	0.0110865	22.2902	0.286772	0.0294433	0.00447435
207505	24	13.6316	0.220445	14.8281	0.170966	33.4099	0.283232	2.45276	0.0332019	1.08887	0.021091	20.6967	0.391361	0.0531048	0.00241075
207505	25	13.895	0.122222	15.0367	0.249364	33.7024	0.318434	2.4257	0.0244673	1.08218	0.0160394	25.2143	0.41145	0.0571993	0.00205078
207505	26	13.8678	0.281138	15.0517	0.214098	33.8601	0.422189	2.44307	0.0287061	1.08601	0.0149441	28.4546	0.970499	0.0436151	0.00217768
207505	27	13.7665	0.222555	14.8371	0.188475	33.3604	0.359287	2.424	0.0284419	1.07819	0.0184554	23.6787	0.250347	0.0334108	0.00329746
207505	28	13.8417	0.29593	15.0169	0.375713	33.5621	0.511817	2.42624	0.0259679	1.08515	0.018922	20.1687	0.350474	0.050667	0.00118495
207505	29	13.739	0.158861	14.8873	0.180587	33.5359	0.265105	2.44169	0.0253267	1.08402	0.0169697	20.1514	0.266391	0.0509671	0.00238599
207505	30	13.7994	0.196511	14.8874	0.262559	33.7678	0.513546	2.44714	0.0187604	1.07884	0.0109998	24.7474	0.536728	0.0456741	0.00202918
207505	31	13.7139	0.179148	14.9249	0.141925	33.4054	0.329051	2.43637	0.0209022	1.08861	0.0121495	26.427	0.571995	0.030153	0.00126524
207505	32	13.8351	0.128199	15.0681	0.170017	33.763	0.334531	2.44052	0.0160769	1.08922	0.0105222	24.8456	0.33652	0.0519263	0.00138202
207505	33	13.8666	0.175397	14.9798	0.215263	33.6611	0.216334	2.42833	0.0215101	1.08045	0.0127239	24.7364	0.566658	0.0525029	0.0014854
207505	34	13.8197	0.188051	14.9101	0.243799	33.5079	0.347776	2.42541	0.0317555	1.07917	0.0182355	22.033	0.212758	0.0521681	0.00122587
207505	35	13.8107	0.122742	15.0703	0.104858	33.7103	0.229544	2.44181	0.0126276	1.08985	0.00706333	24.8259	0.995571	0.0475799	0.00102354
207505	36	13.7642	0.163038	14.8781	0.191284	33.5263	0.370022	2.43625	0.0258584	1.08111	0.0125543	25.4086	0.576372	0.0452871	0.00377516
207505	37	13.8399	0.186907	14.9056	0.333941	33.3853	0.628896	2.41204	0.0235943	1.07681	0.0139174	34.1755	1.11278	0.0237937	0.00172223
207505	38	13.8746	0.167957	15.0871	0.193349	33.9348	0.4248	2.44589	0.0139079	1.08752	0.0117469	38.3356	0.673155	0.0319054	0.00255121
169068	1	13.6872	0.145559	14.8453	0.109347	33.5946	0.337316	2.45447	0.00332936	1.08465	0.00427912	36.84	0.79015	0.0255849	0.000704024
169068	2	13.7058	0.13741	14.8137	0.110632	33.5244	0.318192	2.44603	0.00856237	1.08089	0.00649558	28.7973	0.958964	0.0290135	0.00175739
169068	3	13.6792	0.0709351	14.8527	0.0371155	33.5739	0.134718	2.45439	0.00401791	1.0858	0.00302335	33.3596	0.873223	0.0241642	0.00109076
169068	4	13.6584	0.0467804	14.8469	0.0579071	33.5187	0.142537	2.45408	0.00519671	1.08702	0.00274926	61.7072	1.0875	0.0135282	0.000368632
169068	5	13.7983	0.0325692	14.9423	0.0454415	33.7496	0.0944362	2.44593	0.0115505	1.08291	0.00445436	46.1514	2.16896	0.016896	0.0020093
169068	6	13.6742	0.0438112	14.8492	0.0698124	33.5022	0.127879	2.45003	0.00499	1.08593	0.00325701	38.4339	1.15669	0.0209913	0.00178188
169068	7	13.7368	0.109299	14.8798	0.111485	33.62	0.244012	2.44746	0.00287767	1.08321	0.00148264	60.7639	0.867685	0.0142766	0.000248635
169068	8	13.7578	0.1676	14.9032	0.11798	33.7371	0.222541	2.4523	0.0151936	1.08329	0.00772781	31.164	1.62546	0.0240501	0.00170314
169068	9	13.7929	0.0557957	14.8817	0.0385902	33.6552	0.0956196	2.44013	0.00440008	1.07899	0.00269429	77.1508	1.39229	0.0129001	0.000543375
169068	10	13.8023	0.0500308	14.9122	0.0461758	33.7014	0.102025	2.44177	0.00328372	1.08044	0.00225626	87.0735	4.38944	0.0115181	0.000822037
169068	11	13.729	0.092816	14.7933	0.0751985	33.4678	0.181285	2.43781	0.00518929	1.07757	0.00371455	38.0475	1.01719	0.0248771	0.00109994
169068	12	13.6233	0.107893	14.7436	0.102816	33.2777	0.181691	2.44278	0.00702302	1.08225	0.00176978	32.6068	1.13713	0.0262479	0.00146733
169068	13	13.7474	0.0926325	14.8723	0.0955673	33.646	0.153878	2.44747	0.00610718	1.08183	0.0016824	43.7398	0.631294	0.0172582	0.000803048
169068	14	13.6178	0.0764812	14.779	0.0825302	33.3246	0.172132	2.44716	0.00327245	1.08527	0.00141374	31.8687	0.760256	0.024058	0.000723717
207525	1	13.8967	0.0580897	14.9741	0.055252	33.6753	0.0998311	2.42347	0.00581105	1.07661	0.0041372	49.0722	1.55777	0.0246235	0.00148754
207525	2	13.8807	0.0588098	14.9539	0.050272	33.6913	0.122061	2.42592	0.00483868	1.07756	0.00229637	66.9071	0.942295	0.0177198	0.00142449
207525	3	13.9621	0.0994365	15.0222	0.104525	33.8694	0.237995	2.42594	0.00637507	1.07602	0.00368684	57.6178	3.61963	0.0196788	0.0012697
207525	4	13.9335	0.0827878	15.0752	0.0988506	33.8379	0.216894	2.42836	0.00488941	1.08202	0.00275448	67.9727	3.17672	0.0209444	0.00107205
207525	5	13.8871	0.0713028	14.9529	0.0734412	33.6128	0.14997	2.42056	0.00757195	1.07691	0.00374546	40.3564	0.673302	0.0332991	0.00107294
207525	6	13.8547	0.0737816	14.9289	0.0705395	33.6973	0.139138	2.43256	0.00861152	1.07769	0.00457252	42.0819	0.914965	0.0233694	0.00110178
207525	7	13.9108	0.065367	15.0124	0.0708495	33.7504	0.149726	2.42634	0.00653877	1.0802	0.00377823	50.4022	1.15494	0.0260851	0.00158693
207525	8	13.9332	0.134121	15.0272	0.131193	33.8096	0.303872	2.42686	0.00713177	1.07871	0.0037147	49.7892	1.89374	0.0272889	0.00131228
207525	9	13.8786	0.109143	14.9633	0.118626	33.619	0.251473	2.42253	0.00555244	1.07818	0.00242433	52.6372	0.99894	0.0193799	0.00085536
207525	10	13.9569	0.105685	15.0763	0.133924	33.8741	0.250017	2.42721	0.00660716	1.08019	0.00472207	42.0163	2.08061	0.025988	0.000849284
207525	11	13.9708	0.0989495	15.0472	0.0922567	33.7989	0.212716	2.41949	0.00586811	1.07718	0.00306304	50.852	1.46541	0.0259638	0.00133159
207525	12	13.9104	0.140266	15.0121	0.128161	33.8578	0.273288	2.43434	0.0120889	1.07938	0.00721109	42.8953	1.02302	0.0290616	0.00131842
207525	13	13.9329	0.0797946	14.9924	0.0951602	33.7948	0.17138	2.42698	0.00741673	1.07805	0.00373044	45.9301	3.02568	0.0297444	0.00218082
207525	14	13.9216	0.0715188	14.9674	0.0787093	33.7258	0.15767	2.42273	0.00677928	1.0752	0.00391107	40.1533	1.12232	0.0404946	0.000969911
207525	15	13.8534	0.0449925	14.9361	0.0699098	33.6311	0.104717	2.42778	0.00699523	1.07936	0.00432205	42.0818	0.448976	0.0335991	0.00125733
207525	16	13.9168	0.0709654	14.9493	0.0652189	33.7388	0.0953841	2.42316	0.0099483	1.07436	0.0047628	38.4334	0.462095	0.035995	0.00110888
207525	17	13.979	0.100173	15.0123	0.104875	33.7233	0.211199	2.41284	0.0131839	1.07404	0.00527626	35.3236	0.297704	0.0457489	0.00122051
207525	18	13.8977	0.0750329	14.9845	0.0873823	33.6815	0.181358	2.42366	0.0069163	1.07825	0.00361159	49.4243	3.28923	0.0264015	0.00136503
207525	19	13.9137	0.0681452	15.0096	0.0885908	33.7976	0.184266	2.4291	0.00622176	1.07877	0.0036794	47.9527	0.997968	0.0255586	0.000774525
207525	20	13.9075	0.085442	15.007	0.0817709	33.7867	0.166365	2.42981	0.00939789	1.07922	0.00427627	41.3514	1.70861	0.0279234	0.000890273
207525	21	13.8524	0.0647103	14.9976	0.0608422	33.6905	0.118667	2.43236	0.00661611	1.08278	0.00348199	48.7648	1.30561	0.0178701	0.00151836
207525	22	13.9689	0.0976673	15.0276	0.110306	33.8442	0.229252	2.42304	0.00833387	1.07587	0.00445795	47.1233	2.60967	0.0226506	0.000960316
207525	23	13.952	0.115684	14.9986	0.117049	33.8052	0.253811	2.42337	0.00951649	1.0752	0.00479688	40.1894	1.45113	0.0303363	0.00169755
207525	24	13.9624	0.0820376	15.0041	0.0968401	33.8985	0.219386	2.42787	0.00750554	1.07466	0.00424688	44.2564	2.17161	0.0211782	0.00123416
207525	25	13.9418	0.0836744	15.0488	0.0798209	33.9235	0.151464	2.43365	0.00889444	1.07959	0.00502496	42.9906	2.16811	0.0308394	0.00187502
205942	1	13.7577	0.214168	14.8042	0.244026	33.4572	0.468423	2.43191	0.0141136	1.07607	0.010013	41.4342	3.23497	0.0319413	0.00361049
205942	2	13.7416	0.25293	14.7977	0.240689	33.4109	0.51391	2.43145	0.0322158	1.07688	0.0126279	25.9455	5.45727	0.0468117	0.0111144
205942	3	13.7999	0.211684	14.7929	0.21399	33.372	0.427817	2.41831	0.017799	1.07196	0.0090463	37.8061	1.11917	0.0333936	0.0022675
205942	4	13.7788	0.234739	14.7866	0.241637	33.3568	0.522448	2.42079	0.0122353	1.0731	0.00645334	61.8555	22.2125	0.0207852	0.00728667
205942	5	13.7698	0.391029	14.8133	0.398344	33.4648	0.878776	2.43035	0.0157082	1.0758	0.00812529	44.4573	5.4227	0.0274596	0.00455945
205942	6	13.7297	0.229235	14.8023	0.238039	33.3935	0.511075	2.43223	0.0147113	1.07813	0.00799706	57.0575	12.3954	0.0215947	0.00551186
205942	7	13.7659	0.236407	14.7993	0.213912	33.4205	0.523863	2.42824	0.0153832	1.0755	0.00852824	42.3609	14.7538	0.0281808	0.0106525
[truncated: 2,345 more rows]
[truncated: 1 more columns]

## Sheet: Dataset S4 - Ore Compilation
Dataset S4. Compilation of the Pb isotope data from gold and volcanic hosted massive sulphide ores and granites from the Yilgarn Craton.
[truncated: 156 more rows]

[truncated: 2 more sheets: Dataset S5 - Parameters, D6 - Calculated Mu]
